# Supplementary material for: Metabolomic profiling of rare cell populations isolated by flow cytometry from tissues
Source: eLife. 2021 Jan 20;10:e61980. doi: 10.7554/eLife.61980 (PMC7847306; doi:10.7554/eLife.61980)
Supplement: Figure 1—figure supplement 1—source data 1. [file elife-61980-fig1-figsupp1-data1.xlsx]

## Sheet: 1A
Figure 1 - Supplemental figure 1A
PC (36:2)	Time(min)	Intensity
	0.003654	0
	0.025963	0
	0.046522	0
	0.06695	0
	0.087347	0
	0.107742	0
	0.128163	0
	0.148561	0
	0.168963	0
	0.189364	0
	0.20976	0
	0.230165	0
	0.250567	0
	0.270979	0
	0.291386	0
	0.311784	0
	0.332215	0
	0.352618	0
	0.373019	0
	0.393418	0
	0.413826	0
	0.434225	0
	0.454619	0
	0.475059	0
	0.495459	0
	0.515864	0
	0.53627	0
	0.556709	0
	0.577104	0
	0.597521	0
	0.617916	0
	0.638328	0
	0.658725	0
	0.679123	0
	0.699538	0
	0.719939	0
	0.740357	0
	0.760759	0
	0.781163	0
	0.801597	0
	0.82201	0
	0.842408	0
	0.862805	0
	0.883214	0
	0.903615	0
	0.924022	0
	0.944439	0
	0.964836	0
	0.985236	0
	1.00564	0
	1.02609	0
	1.04649	0
	1.06692	0
	1.08567	0
	1.10429	0
	1.12288	0
	1.14146	0
	1.16005	0
	1.17867	1118169
	1.1973	4492803
	1.21591	8887350
	1.23449	14683292
	1.25308	23853464
	1.27168	19844742
	1.29028	18975430
	1.30888	15522214
	1.32749	13236093
	1.34611	10357573
	1.36472	6710434
	1.38334	4734845
	1.40197	3961777
	1.42059	2930581
	1.43922	2309009
	1.45785	1644829
	1.47648	1182907
	1.49513	1451767
	1.51376	1016868
	1.53241	1151555
	1.55105	761395
	1.5697	668019
	1.58839	647335
	1.60705	614487
	1.62573	851526
	1.64439	514567
	1.66306	616088
	1.68172	449843
	1.7004	395572
	1.71907	560148
	1.73775	490009
	1.75643	447011
	1.77511	370477
	1.79379	318192
	1.81247	323879
	1.83115	286680
	1.84983	414529
	1.86851	254012
	1.88717	309532
	1.90582	127028
	1.92447	325868
	1.94311	217503
	1.96177	205252
	1.98042	271036
	1.99909	167520
	2.01781	192061
	2.03659	60596.7
	2.05539	92532.1
	2.07421	36234.1
	2.09303	60531
	2.11186	32476.7
	2.13069	102703
	2.14952	96470.1
	2.16835	68349.4
	2.18719	0
	2.20601	72699
	2.22484	86054.8
	2.24366	61336
	2.26248	41919
	2.2813	80963.4
	2.30012	30673.2
	2.31893	0
	2.33772	53216.4
	2.35651	46192.3
	2.37528	64239.6
	2.39402	90520.4
	2.41275	46673
	2.43149	62280.6
	2.45023	51209.4
	2.46895	68781.6
	2.48767	63813.8
	2.50641	141132
	2.52514	66404
	2.54386	55303
	2.56258	60705.8
	2.58129	0
	2.6	68372.6
	2.61873	46617.4
	2.63748	40269.6
	2.6562	0
	2.67492	56146.1
	2.69364	64370.4
	2.71236	49863.2
	2.73108	82830.5
	2.74981	50050.2
	2.76854	104633
	2.78726	46552.1
	2.80598	77586.3
	2.82469	95446.6
	2.84341	93193.8
	2.86214	84216.9
	2.88086	111912
	2.89958	59396.1
	2.9183	43142.4
	2.93701	103701
	2.95573	81137.1
	2.97445	85144
	2.99317	67309.7
	3.01188	66271.4
	3.03059	0
	3.04931	41300.6
	3.06803	82345.4
	3.08674	90595.4
	3.10545	42460.5
	3.1242	61668.8
	3.14292	0
	3.16164	67204.1
	3.18036	47065.1
	3.19907	49363.9
	3.21778	84253.7
	3.2365	67296.3
	3.25522	67041.8
	3.27394	0
	3.29266	71699.7
	3.31137	56058.9
	3.33009	0
	3.34881	35255.6
	3.36754	0
	3.38627	53474.4
	3.40501	0
	3.42374	49860.6
	3.44249	0
	3.46126	0
	3.48003	0
	3.49882	0
	3.51764	0
	3.53645	0
	3.55527	0
	3.57409	30157.2
	3.59292	0
	3.61176	0
	3.6306	0
	3.64944	0
	3.66829	0
	3.68714	0
	3.70599	0
	3.72484	0
	3.74369	40820.6
	3.76254	0
	3.78139	0
	3.80027	0
	3.81912	0
	3.83795	0
	3.85681	32583.7
	3.87566	0
	3.89451	0
	3.91337	0
	3.93224	0
	3.9511	0
	3.96997	28879.5
	3.98884	0
	4.0077	0
	4.02658	34527.1
	4.04545	0
	4.06433	40850.6
	4.08321	0
	4.10208	0
	4.12096	0
	4.13984	0
	4.15871	0
	4.17761	0
	4.1965	0
	4.21538	0
	4.23426	0
	4.25315	0
	4.27203	0
	4.29093	0
	4.30982	0
	4.3287	0
	4.34759	0
	4.36648	0
	4.38536	0
	4.40423	0
	4.42313	0
	4.44199	0
	4.46083	0
	4.47968	0
	4.4985	0
	4.51732	0
	4.53615	0
	4.55499	0
	4.57381	0
	4.59264	0
	4.61148	0
	4.6303	0
	4.64914	0
	4.66797	0
	4.68682	0
	4.70568	0
	4.72453	0
	4.74339	0
	4.76229	0
	4.78118	0
	4.80008	0
	4.819	0
	4.8379	0
	4.85682	0
	4.87572	0
	4.89463	0
	4.91355	0
	4.93247	0
	4.95139	0
	4.97032	0
	4.98923	0
	5.00814	0
	5.02708	0
	5.04599	0
	5.06492	0
	5.08384	0
	5.10276	0
	5.12169	0
	5.1406	0
	5.15949	0
	5.17841	0
	5.19732	0
	5.21623	0
	5.23516	0
	5.25408	0
	5.27299	0
	5.2919	0
	5.31082	0
	5.32975	0
	5.34866	0
	5.36756	0
	5.38645	0
	5.40534	0
	5.42418	0
	5.44304	0
	5.46186	0
	5.48068	0
	5.49951	0
	5.51832	0
	5.53715	0
	5.55601	0
	5.57486	0
	5.59375	0
	5.61263	0
	5.63152	0
	5.65041	0
	5.66931	0
	5.68821	0
	5.70714	0
	5.72605	0
	5.74498	0
	5.7639	0
	5.7828	0
	5.80171	0
	5.82062	0
	5.83953	0
	5.85843	0
	5.87731	0
	5.89617	0
	5.915	0
	5.93384	0
	5.95265	0
	5.97147	0
	5.99029	0
	6.00915	0
	6.02801	0
	6.0469	0
	6.06582	0
	6.08472	0
	6.10362	0
	6.12253	0
	6.14143	0
	6.16034	0
	6.17927	0
	6.19818	0
	6.21709	0
	6.236	0
	6.25491	0
	6.27383	0
	6.29275	0
	6.31165	0
	6.33055	0
	6.34946	0
	6.36836	0
	6.38729	0
	6.4062	0
	6.42509	0
	6.44398	0
	6.46286	0
	6.48173	0
	6.50063	0
	6.51953	0
	6.53839	0
	6.55725	0
	6.57613	0
	6.595	0
	6.61389	0
	6.63276	0
	6.65161	0
	6.67048	0
	6.68934	0
	6.70819	0
	6.72701	0
	6.74583	0
	6.76464	0
	6.78344	0
	6.80224	0
	6.82102	0
	6.8398	0
	6.85858	0
	6.87736	0
	6.89614	0
	6.91492	0
	6.93369	0
	6.95245	0
	6.97125	0
	6.99001	0
	7.00877	0
	7.02755	0
	7.0463	0
	7.06505	0
	7.0838	0
	7.10254	0
	7.12126	0
	7.13998	0
	7.15869	0
	7.17739	0
	7.19608	0
	7.21477	0
	7.23346	0
	7.25217	0
	7.27085	0
	7.28955	0
	7.30824	0
	7.32696	0
	7.34571	0
	7.36447	0
	7.38326	0
	7.40207	0
	7.42094	0
	7.43981	0
	7.45869	0
	7.47755	0
	7.49639	0
	7.51523	0
	7.53403	0
	7.55281	0
	7.57158	0
	7.59034	0
	7.60909	0
	7.62781	0
	7.64653	0
	7.66525	0
	7.68396	0
	7.70266	0
	7.72138	0
	7.74009	0
	7.75879	0
	7.77751	0
	7.79623	0
	7.81496	0
	7.83369	0
	7.85243	0
	7.87116	0
	7.88992	0
	7.9087	0
	7.92746	0
	7.94622	0
	7.96499	0
	7.98375	0
	8.00252	0
	8.02128	0
	8.04004	0
	8.05881	0
	8.07757	0
	8.09633	0
	8.1151	0
	8.13387	0
	8.15265	0
	8.17141	0
	8.19017	0
	8.20893	0
	8.22771	0
	8.24648	0
	8.26525	0
	8.28402	0
	8.30279	0
	8.3215	0
	8.34027	0
	8.35906	0
	8.37783	0
	8.39663	0
	8.41544	0
	8.43421	0
	8.45298	0
	8.47173	0
	8.49048	0
	8.50923	0
	8.52796	0
	8.54669	0
	8.56543	0
	8.58417	0
	8.6029	0
	8.62166	0
	8.64041	0
	8.65916	0
	8.67791	0
	8.69669	0
	8.71544	0
	8.7342	0
	8.75296	0
	8.77172	0
	8.79048	0
	8.80924	0
	8.828	0
	8.84677	0
	8.86554	0
	8.88431	0
	8.90307	0
	8.9218	0
	8.94051	0
	8.95922	0
	8.97788	0
	8.99653	0
	9.01518	0
	9.03383	0
	9.05248	0
	9.07114	0
	9.08978	0
	9.10845	0
	9.12711	0
	9.14579	0
	9.16448	0
	9.18318	0
	9.20189	0
	9.22061	0
	9.23933	0
	9.2581	0
	9.27685	0
	9.29559	0
	9.31433	0
	9.3331	0
	9.35185	0
	9.37061	0
	9.38936	0
	9.40811	0
	9.42686	0
	9.44561	0
	9.46436	0
	9.48311	0
	9.50186	0
	9.52061	0
	9.53936	0
	9.55815	0
	9.57691	0
	9.59566	0
	9.61444	0
	9.6332	0
	9.65196	0
	9.67072	0
	9.68948	0
	9.70824	0
	9.727	0
	9.74577	0
	9.76454	0
	9.78329	0
	9.80205	0
	9.82085	0
	9.83962	0
	9.8584	0
	9.87717	0
	9.89595	0
	9.91472	0
	9.9335	0
	9.95227	0
	9.97105	0
	9.98982	0
	10.0086	0
	10.0274	0
	10.0462	0
	10.065	0
	10.0838	0
	10.1026	0
	10.1214	0
	10.1402	0
	10.159	0
	10.1777	0
	10.1965	0
	10.2153	0
	10.2341	0
	10.2529	0
	10.2716	0
	10.2904	0
	10.3092	0
	10.3279	0
	10.3467	0
	10.3654	0
	10.3842	0
	10.403	0
	10.4217	0
	10.4405	0
	10.4593	0
	10.4781	0
	10.4969	0
	10.5157	0
	10.5345	0
	10.5533	0
	10.5721	0
	10.5909	0
	10.6097	0
	10.6285	0
	10.6473	0
	10.6661	0
	10.6849	0
	10.7037	0
	10.7225	0
	10.7413	0
	10.7601	0
	10.7789	0
	10.7977	0
	10.8165	0
	10.8353	0
	10.8541	0
	10.8729	0
	10.8917	0
	10.9105	0
	10.9293	0
	10.9481	0
	10.9668	0
	10.9856	0
	11.0044	0
	11.0231	0
	11.0419	0
	11.0607	0
	11.0794	0
	11.0982	0
	11.117	0
	11.1358	0
	11.1545	0
	11.1733	0
	11.1921	0
	11.2109	0
	11.2296	0
	11.2484	0
	11.2671	0
	11.2859	0
	11.3047	0
	11.3234	0
	11.3422	0
	11.361	0
	11.3797	0
	11.3985	0
	11.4172	0
	11.436	0
	11.4547	0
	11.4735	0
	11.4923	0
	11.511	0
	11.5298	0
	11.5485	0
	11.5673	0
	11.5861	0
	11.6048	0
	11.6236	0
	11.6424	0
	11.6612	0
	11.68	0
	11.6988	0
	11.7175	0
	11.7363	0
	11.7551	0
	11.7739	0
	11.7926	0
	11.8114	0
	11.8301	0
	11.8489	0
	11.8677	0
	11.8864	0
	11.9051	0
	11.9239	0
	11.9426	0
	11.9613	0
	11.9801	0
	11.9989	0
	12.0176	0
	12.0364	0
	12.0551	0
	12.0739	0
	12.0927	0
	12.1114	0
	12.1302	0
	12.149	0
	12.1678	0
	12.1865	0
	12.2053	0
	12.2241	0
	12.2429	0
	12.2616	0
	12.2804	0
	12.2992	0
	12.3179	0
	12.3367	0
	12.3555	0
	12.3743	0
	12.3931	0
	12.4118	0
	12.4306	0
	12.4494	0
	12.4682	0
	12.4869	0
	12.5057	0
	12.5245	0
	12.5433	0
	12.562	0
	12.5808	0
	12.5996	0
	12.6184	0
	12.6372	0
	12.6559	0
	12.6747	0
	12.6935	0
	12.7123	0
	12.731	0
	12.7498	0
	12.7686	0
	12.7874	0
	12.8062	0
	12.8249	0
	12.8437	0
	12.8625	0
	12.8812	0
	12.9	0
	12.9188	0
	12.9376	0
	12.9564	0
	12.9751	0
	12.9939	0
	13.0127	0
	13.0314	0
	13.0502	0
	13.069	0
	13.0878	0
	13.1065	0
	13.1253	0
	13.1441	0
	13.1629	0
	13.1816	0
	13.2004	0
	13.2192	0
	13.2379	0
	13.2567	0
	13.2755	0
	13.2942	0
	13.313	0
	13.3318	0
	13.3506	0
	13.3694	0
	13.3881	0
	13.4069	0
	13.4256	0
	13.4444	0
	13.4632	0
	13.482	0
	13.5007	0
	13.5195	0
	13.5383	0
	13.557	0
	13.5758	0
	13.5946	0
	13.6134	0
	13.6321	0
	13.6509	0
	13.6697	0
	13.6884	0
	13.7072	0
	13.726	0
	13.7447	0
	13.7635	0
	13.7823	0
	13.8011	0
	13.8198	0
	13.8386	0
	13.8574	0
	13.8762	0
	13.8949	0
	13.9137	0
	13.9324	0
	13.9512	0
	13.97	0
	13.9887	0
	14.0075	0
	14.0263	0
	14.045	0
	14.0638	0
	14.0826	0
	14.1014	0
	14.1201	0
	14.1389	0
	14.1577	0
	14.1764	0
	14.1952	0
	14.214	0
	14.2327	0
	14.2515	0
	14.2703	0
	14.289	0
	14.3078	0
	14.3266	0
	14.3453	0
	14.3641	0
	14.3829	0
	14.4016	0
	14.4204	0
	14.4391	0
	14.4579	0
	14.4767	0
	14.4954	0
	14.5142	0
	14.533	0
	14.5518	0
	14.5707	0
	14.5895	0
	14.6082	0
	14.6302	0
	14.6524	0
	14.6746	0
	14.6968	0
	14.719	0
	14.7413	0
	14.7635	0
	14.7857	0
	14.8079	0
	14.8301	0
	14.8523	0
	14.8746	0
	14.8968	0
	14.919	0
	14.9412	0
	14.9634	0
	14.9856	0
	15.0079	0
	15.0301	0
	15.0523	0
	15.0745	0
	15.0968	0
	15.119	0
	15.1412	0
	15.1634	0
	15.1856	0
	15.2078	0
	15.2301	0
	15.2523	0
	15.273	0
	15.2921	0
	15.3108	0
	15.3295	0
	15.3481	0
	15.3667	0
	15.3853	0
	15.404	0
	15.4226	0
	15.4413	0
	15.4599	0
	15.4786	0
	15.4972	0
	15.5159	0
	15.5345	0
	15.5531	0
	15.5717	0
	15.5903	0
	15.6089	0
	15.6275	0
	15.6461	0
	15.6647	0
	15.6833	0
	15.7019	0
	15.7205	0
	15.7391	0
	15.7577	0
	15.7764	0
	15.795	0
	15.8136	0
	15.8323	0
	15.8525	0
	15.8746	0
	15.8968	0
	15.919	0
	15.9412	0
	15.9635	0
	15.9857	0
	16.0079	0
	16.0301	0
	16.0523	0
	16.0746	0
	16.0968	0
	16.119	0
	16.1412	0
	16.1635	0
	16.1857	0
	16.2079	0
	16.2301	0
	16.2523	0
	16.2746	0
	16.2968	0
	16.3176	0
	16.3398	0
	16.362	0
	16.3842	0
	16.4064	0
	16.4286	0
	16.4508	0
	16.4731	0
	16.4953	0
	16.5175	0
	16.5397	0
	16.5619	0
	16.5842	0
	16.6064	0
	16.6286	0
	16.6508	0
	16.673	0
	16.6953	0
	16.7175	0
	16.7397	0
	16.7619	0
	16.7841	0
	16.8063	0
	16.8286	0
	16.8508	0
	16.873	0
	16.8953	0
	16.9175	0
	16.9397	0
	16.9619	0
	16.9841	0
	17.0064	0
	17.0286	0
	17.0508	0
	17.073	0
	17.0952	0
	17.1175	0
	17.1397	0
	17.1619	0
	17.1841	0
	17.2063	0
	17.2285	0
	17.2508	0
	17.273	0
	17.2952	0
	17.3174	0
	17.3396	0
	17.3619	0
	17.3824	0
	17.4036	0
	17.4258	0
	17.448	0
	17.4703	0
	17.4925	0
	17.5147	0
	17.5369	0
	17.5591	0
	17.5814	0
	17.6036	0
	17.6242	0
	17.6458	0
	17.6681	0
	17.6903	0
	17.7125	0
	17.7347	0
	17.7553	0
	17.777	0
	17.7992	0
	17.8214	0
	17.842	0
	17.8641	0
	17.8863	0
	17.9085	0
	17.9291	0
	17.9504	0
	17.971	0
	17.9927	0
	18.0149	0
	18.0371	0
	18.0593	0
	18.0799	0
	18.101	0
	18.1232	0
	18.1454	0
	18.166	0
	18.1864	0
	18.2079	0
	18.2301	0
	18.2507	0
	18.2722	0
	18.2928	0
	18.3132	0
	18.3343	0
	18.3549	0
	18.3753	0
	18.3968	0
	18.419	0
	18.4412	0
	18.4635	0
	18.484	0
	18.5061	0
	18.5283	0
	18.5489	0
	18.5692	0
	18.5896	0
	18.61	0
	18.6313	0
	18.6518	0
	18.6722	0
	18.6943	0
	18.7166	0
	18.7371	0
	18.7575	0
	18.7796	0
	18.8002	0
	18.8206	0
	18.841	0
	18.8626	0
	18.8831	0
	18.9035	0
	18.9239	0
	18.9443	0
	18.9647	0
	18.9851	0
	19.0071	0
	19.0277	0
	19.048	0
	19.0684	0
	19.0889	0
	19.1101	0
	19.1307	0
	19.1511	0
	19.1715	0
	19.1919	0
	19.2123	0
	19.2327	0
	19.2531	0
	19.2749	0
	19.2954	0
	19.3158	0
	19.3362	0
	19.3566	0
	19.377	0
	19.3974	0
	19.4178	0
	19.4382	0
	19.4586	0
	19.479	0
	19.4994	0
	19.5198	0
	19.5402	0
	19.5606	0
	19.5827	0
	19.6033	0
	19.6237	0
	19.6441	0
	19.6645	0
	19.6849	0
	19.7053	0
	19.7257	0
	19.7461	0
	19.7665	0
	19.7869	0
	19.8073	0
	19.8277	0
	19.8481	0
	19.8685	0
	19.8889	0
	19.9093	0
	19.9297	0
	19.9501	0
	19.9705	0
	19.9909	0
	20.0113	0
	20.0317	0
	20.0521	0
	20.0725	0
	20.0929	0
	20.1134	0
	20.1337	0
	20.1541	0
	20.1745	0
	20.1949	0
	20.2153	0
	20.2358	0
	20.2562	0
	20.2766	0
	20.297	0
	20.3174	0
	20.3378	0
	20.3582	0
	20.3786	0
	20.399	0
	20.4194	0
	20.4398	0
	20.4602	0
	20.4806	0
	20.501	0
	20.5214	0
	20.5418	0
	20.5622	0
	20.5826	0
	20.603	0
	20.6234	0
	20.6438	0
	20.6642	0
	20.6846	0
	20.705	0
	20.7254	0
	20.7458	0
	20.7662	0
	20.7866	0
	20.807	0
	20.8274	0
	20.8478	0
	20.8682	0
	20.8886	0
	20.909	0
	20.9294	0
	20.9498	0
	20.9702	0
	20.9906	0
	21.011	0
	21.0314	0
	21.0518	0
	21.0722	0
	21.0926	0
	21.113	0
	21.1334	0
	21.1538	0
	21.1742	0
	21.1946	0
	21.215	0
	21.2355	0
	21.2558	0
	21.2763	0
	21.2966	0
	21.317	0
	21.3375	0
	21.3578	0
	21.3783	0
	21.3986	0
	21.419	0
	21.4395	0
	21.4599	0
	21.4803	0
	21.5007	0
	21.5211	0
	21.5415	0
	21.5619	0
	21.5823	0
	21.6027	0
	21.6231	0
	21.6435	0
	21.6639	0
	21.6843	0
	21.7047	0
	21.7251	0
	21.7455	0
	21.7659	0
	21.7862	0
	21.8066	0
	21.827	0
	21.8474	0
	21.8678	0
	21.8882	0
	21.9086	0
	21.929	0
	21.9494	0
	21.9698	0
	21.9902	0
	22.0106	0
	22.031	0
	22.0514	0
	22.0719	0
	22.0922	0
	22.1126	0
	22.1331	0
	22.1534	0
	22.1739	0
	22.1943	0
	22.2147	0
	22.2351	0
	22.2555	0
	22.2759	0
	22.2963	0
	22.3167	0
	22.3371	0
	22.3575	0
	22.3779	0
	22.3983	0
	22.4187	0
	22.4391	0
	22.4595	0
	22.48	0
	22.5004	0
	22.5208	0
	22.5412	0
	22.5616	0
	22.582	0
	22.6024	0
	22.6228	0
	22.6432	0
	22.6636	0
	22.684	0
	22.7044	0
	22.7248	0
	22.7452	0
	22.7656	0
	22.786	0
	22.8064	0
	22.8269	0
	22.8472	0
	22.8677	0
	22.8881	0
	22.9085	0
	22.9289	0
	22.9493	0
	22.9697	0
	22.9901	0
	23.0105	0
	23.0309	0
	23.0513	0
	23.0717	0
	23.0921	0
	23.1125	0
	23.1329	0
	23.1534	0
	23.1738	0
	23.1942	0
	23.2146	0
	23.235	0
	23.2554	0
	23.2758	0
	23.2962	0
	23.3166	0
	23.337	0
	23.3574	0
	23.3778	0
	23.3982	0
	23.4186	0
	23.4391	0
	23.4595	0
	23.4798	0
	23.5003	0
	23.5207	0
	23.5411	0
	23.5615	0
	23.5819	0
	23.6023	0
	23.6227	0
	23.6431	0
	23.6635	0
	23.6839	0
	23.7043	0
	23.7247	0
	23.7451	0
	23.7655	0
	23.7859	0
	23.8063	0
	23.8268	0
	23.8471	0
	23.8676	0
	23.8879	0
	23.9083	0
	23.9288	0
	23.9491	0
	23.9696	0
	23.99	0
	24.0103	0
	24.0308	0
	24.0512	0
	24.0716	0
	24.092	0
	24.1124	0
	24.1328	0
	24.1532	0
	24.1736	0
	24.194	0
	24.2144	0
	24.2348	0
	24.2552	0
	24.2756	0
	24.296	0
	24.3164	0
	24.3368	0
	24.3573	0
	24.3777	0
	24.3981	0
	24.4185	0
	24.4389	0
	24.4593	0
	24.4797	0
	24.5001	0
	24.5205	0
	24.5409	0
	24.5613	0
	24.5817	0
	24.6021	0
	24.6226	0
	24.6429	0
	24.6633	0
	24.6837	0
	24.7042	0
	24.7246	0
	24.745	0
	24.7654	0
	24.7858	0
	24.8062	0
	24.8266	0
	24.8469	0
	24.8674	0
	24.8878	0
	24.9082	0
	24.9286	0
	24.949	0
	24.9694	0
	24.9898	0
	25.0102	0
	25.0306	0
	25.051	0
	25.0714	0
	25.0918	0
	25.1122	0
	25.1326	0
	25.153	0
	25.1734	0
	25.1938	0
	25.2142	0
	25.2346	0
	25.255	0
	25.2754	0
	25.2958	0
	25.3162	0
	25.3366	0
	25.3571	0
	25.3774	0
	25.3979	0
	25.4183	0
	25.4386	0
	25.4591	0
	25.4795	0
	25.4999	0
	25.5203	0
	25.5407	0
	25.5611	0
	25.5815	0
	25.6019	0
	25.6223	0
	25.6427	0
	25.6631	0
	25.6835	0
	25.704	0
	25.7244	0
	25.7448	0
	25.7652	0
	25.7856	0
	25.806	0
	25.8264	0
	25.8468	0
	25.8672	0
	25.8876	0
	25.908	0
	25.9284	0
	25.9488	0
	25.9692	0
	25.9896	0
	26.01	0
	26.0304	0
	26.0508	0
	26.0712	0
	26.0917	0
	26.112	0
	26.1324	0
	26.1529	0
	26.1733	0
	26.1937	0
	26.2141	0
	26.2345	0
	26.2549	0
	26.2749	0
	26.2953	0
	26.3157	0
	26.3361	0
	26.3565	0
	26.3769	0
	26.3974	0
	26.4178	0
	26.4382	0
	26.4586	0
	26.479	0
	26.4994	0
	26.5198	0
	26.5402	0
	26.5606	0
	26.581	0
	26.6014	0
	26.6218	0
	26.6422	0
	26.6626	0
	26.683	0
	26.7034	0
	26.7238	0
	26.7442	0
	26.7646	0
	26.785	0
	26.8054	0
	26.8258	0
	26.8462	0
	26.8666	0
	26.8871	0
	26.9075	0
	26.9279	0
	26.9483	0
	26.9687	0
	26.9891	0
	27.0095	0

## Sheet: 1B
Figure 1 - supplemental figure 1B
PE(38:6)	Time (min)	Intensity
	0.003654	0
	0.025963	0
	0.046522	0
	0.06695	0
	0.087347	0
	0.107742	0
	0.128163	0
	0.148561	0
	0.168963	0
	0.189364	0
	0.20976	0
	0.230165	0
	0.250567	0
	0.270979	0
	0.291386	0
	0.311784	0
	0.332215	0
	0.352618	0
	0.373019	0
	0.393418	0
	0.413826	0
	0.434225	0
	0.454619	0
	0.475059	0
	0.495459	0
	0.515864	0
	0.53627	0
	0.556709	0
	0.577104	0
	0.597521	0
	0.617916	0
	0.638328	0
	0.658725	0
	0.679123	0
	0.699538	0
	0.719939	0
	0.740357	0
	0.760759	0
	0.781163	0
	0.801597	0
	0.82201	0
	0.842408	0
	0.862805	0
	0.883214	0
	0.903615	0
	0.924022	0
	0.944439	0
	0.964836	0
	0.985236	0
	1.00564	0
	1.02609	0
	1.04649	0
	1.06692	12246.1
	1.08567	0
	1.10429	0
	1.12288	0
	1.14146	0
	1.16005	0
	1.17867	0
	1.1973	316425
	1.21591	888994
	1.23449	612376
	1.25308	1902671
	1.27168	2186014
	1.29028	1811423
	1.30888	1679404
	1.32749	1480594
	1.34611	1199553
	1.36472	776530
	1.38334	558441
	1.40197	496036
	1.42059	418796
	1.43922	385678
	1.45785	234969
	1.47648	126164
	1.49513	107352
	1.51376	0
	1.53241	114103
	1.55105	0
	1.5697	130142
	1.58839	115608
	1.60705	0
	1.62573	70155
	1.64439	0
	1.66306	61728.4
	1.68172	78104.9
	1.7004	0
	1.71907	0
	1.73775	76181.9
	1.75643	69528.7
	1.77511	55841.1
	1.79379	86006.5
	1.81247	0
	1.83115	0
	1.84983	0
	1.86851	0
	1.88717	0
	1.90582	0
	1.92447	0
	1.94311	0
	1.96177	0
	1.98042	0
	1.99909	0
	2.01781	0
	2.03659	0
	2.05539	0
	2.07421	0
	2.09303	0
	2.11186	0
	2.13069	0
	2.14952	0
	2.16835	0
	2.18719	0
	2.20601	0
	2.22484	0
	2.24366	0
	2.26248	0
	2.2813	0
	2.30012	0
	2.31893	0
	2.33772	0
	2.35651	0
	2.37528	0
	2.39402	0
	2.41275	0
	2.43149	0
	2.45023	0
	2.46895	0
	2.48767	0
	2.50641	0
	2.52514	0
	2.54386	0
	2.56258	0
	2.58129	0
	2.6	0
	2.61873	0
	2.63748	0
	2.6562	0
	2.67492	0
	2.69364	0
	2.71236	0
	2.73108	0
	2.74981	0
	2.76854	36356.2
	2.78726	35290.9
	2.80598	39792.2
	2.82469	42293
	2.84341	0
	2.86214	0
	2.88086	0
	2.89958	0
	2.9183	0
	2.93701	0
	2.95573	0
	2.97445	0
	2.99317	0
	3.01188	0
	3.03059	0
	3.04931	0
	3.06803	0
	3.08674	0
	3.10545	0
	3.1242	0
	3.14292	0
	3.16164	0
	3.18036	0
	3.19907	36764.1
	3.21778	0
	3.2365	40037.2
	3.25522	0
	3.27394	0
	3.29266	0
	3.31137	0
	3.33009	0
	3.34881	0
	3.36754	0
	3.38627	0
	3.40501	0
	3.42374	0
	3.44249	0
	3.46126	0
	3.48003	0
	3.49882	0
	3.51764	0
	3.53645	0
	3.55527	0
	3.57409	0
	3.59292	0
	3.61176	0
	3.6306	0
	3.64944	0
	3.66829	0
	3.68714	0
	3.70599	0
	3.72484	0
	3.74369	36979
	3.76254	0
	3.78139	0
	3.80027	0
	3.81912	0
	3.83795	0
	3.85681	0
	3.87566	0
	3.89451	0
	3.91337	0
	3.93224	0
	3.9511	0
	3.96997	0
	3.98884	0
	4.0077	0
	4.02658	0
	4.04545	0
	4.06433	0
	4.08321	0
	4.10208	0
	4.12096	0
	4.13984	0
	4.15871	0
	4.17761	0
	4.1965	0
	4.21538	0
	4.23426	0
	4.25315	0
	4.27203	0
	4.29093	0
	4.30982	0
	4.3287	0
	4.34759	0
	4.36648	0
	4.38536	0
	4.40423	0
	4.42313	0
	4.44199	0
	4.46083	0
	4.47968	0
	4.4985	0
	4.51732	0
	4.53615	0
	4.55499	0
	4.57381	0
	4.59264	0
	4.61148	0
	4.6303	0
	4.64914	0
	4.66797	0
	4.68682	0
	4.70568	0
	4.72453	0
	4.74339	0
	4.76229	0
	4.78118	0
	4.80008	0
	4.819	0
	4.8379	0
	4.85682	0
	4.87572	0
	4.89463	0
	4.91355	0
	4.93247	0
	4.95139	0
	4.97032	0
	4.98923	0
	5.00814	0
	5.02708	0
	5.04599	0
	5.06492	0
	5.08384	0
	5.10276	0
	5.12169	0
	5.1406	0
	5.15949	0
	5.17841	0
	5.19732	0
	5.21623	0
	5.23516	0
	5.25408	0
	5.27299	0
	5.2919	0
	5.31082	0
	5.32975	0
	5.34866	0
	5.36756	0
	5.38645	0
	5.40534	0
	5.42418	0
	5.44304	0
	5.46186	0
	5.48068	0
	5.49951	0
	5.51832	0
	5.53715	0
	5.55601	0
	5.57486	0
	5.59375	0
	5.61263	0
	5.63152	0
	5.65041	0
	5.66931	0
	5.68821	0
	5.70714	0
	5.72605	0
	5.74498	0
	5.7639	0
	5.7828	0
	5.80171	0
	5.82062	0
	5.83953	0
	5.85843	0
	5.87731	0
	5.89617	0
	5.915	0
	5.93384	0
	5.95265	0
	5.97147	0
	5.99029	0
	6.00915	0
	6.02801	0
	6.0469	0
	6.06582	0
	6.08472	0
	6.10362	0
	6.12253	0
	6.14143	0
	6.16034	0
	6.17927	0
	6.19818	0
	6.21709	0
	6.236	0
	6.25491	0
	6.27383	0
	6.29275	0
	6.31165	0
	6.33055	0
	6.34946	0
	6.36836	0
	6.38729	0
	6.4062	0
	6.42509	0
	6.44398	0
	6.46286	0
	6.48173	0
	6.50063	0
	6.51953	0
	6.53839	0
	6.55725	0
	6.57613	0
	6.595	0
	6.61389	0
	6.63276	0
	6.65161	0
	6.67048	0
	6.68934	0
	6.70819	0
	6.72701	0
	6.74583	0
	6.76464	0
	6.78344	0
	6.80224	0
	6.82102	0
	6.8398	0
	6.85858	0
	6.87736	0
	6.89614	0
	6.91492	0
	6.93369	0
	6.95245	0
	6.97125	0
	6.99001	0
	7.00877	0
	7.02755	0
	7.0463	0
	7.06505	0
	7.0838	0
	7.10254	0
	7.12126	0
	7.13998	0
	7.15869	0
	7.17739	0
	7.19608	0
	7.21477	0
	7.23346	0
	7.25217	0
	7.27085	0
	7.28955	0
	7.30824	0
	7.32696	0
	7.34571	0
	7.36447	0
	7.38326	0
	7.40207	0
	7.42094	0
	7.43981	0
	7.45869	0
	7.47755	0
	7.49639	0
	7.51523	0
	7.53403	0
	7.55281	0
	7.57158	0
	7.59034	0
	7.60909	0
	7.62781	0
	7.64653	0
	7.66525	0
	7.68396	0
	7.70266	0
	7.72138	0
	7.74009	0
	7.75879	0
	7.77751	0
	7.79623	0
	7.81496	0
	7.83369	0
	7.85243	0
	7.87116	0
	7.88992	0
	7.9087	0
	7.92746	0
	7.94622	0
	7.96499	0
	7.98375	0
	8.00252	0
	8.02128	0
	8.04004	0
	8.05881	0
	8.07757	0
	8.09633	0
	8.1151	0
	8.13387	0
	8.15265	0
	8.17141	0
	8.19017	0
	8.20893	0
	8.22771	0
	8.24648	0
	8.26525	0
	8.28402	0
	8.30279	0
	8.3215	0
	8.34027	0
	8.35906	0
	8.37783	0
	8.39663	0
	8.41544	0
	8.43421	0
	8.45298	0
	8.47173	0
	8.49048	0
	8.50923	0
	8.52796	0
	8.54669	0
	8.56543	0
	8.58417	0
	8.6029	0
	8.62166	0
	8.64041	0
	8.65916	0
	8.67791	0
	8.69669	0
	8.71544	0
	8.7342	0
	8.75296	0
	8.77172	0
	8.79048	0
	8.80924	0
	8.828	0
	8.84677	0
	8.86554	0
	8.88431	0
	8.90307	0
	8.9218	0
	8.94051	0
	8.95922	0
	8.97788	0
	8.99653	0
	9.01518	0
	9.03383	0
	9.05248	0
	9.07114	0
	9.08978	0
	9.10845	0
	9.12711	0
	9.14579	0
	9.16448	0
	9.18318	0
	9.20189	0
	9.22061	0
	9.23933	0
	9.2581	0
	9.27685	0
	9.29559	0
	9.31433	0
	9.3331	0
	9.35185	0
	9.37061	0
	9.38936	0
	9.40811	0
	9.42686	0
	9.44561	0
	9.46436	0
	9.48311	0
	9.50186	0
	9.52061	0
	9.53936	0
	9.55815	0
	9.57691	0
	9.59566	0
	9.61444	0
	9.6332	0
	9.65196	0
	9.67072	0
	9.68948	0
	9.70824	0
	9.727	0
	9.74577	0
	9.76454	0
	9.78329	0
	9.80205	0
	9.82085	0
	9.83962	0
	9.8584	0
	9.87717	0
	9.89595	0
	9.91472	0
	9.9335	0
	9.95227	0
	9.97105	0
	9.98982	0
	10.0086	0
	10.0274	0
	10.0462	0
	10.065	0
	10.0838	0
	10.1026	0
	10.1214	0
	10.1402	0
	10.159	0
	10.1777	0
	10.1965	0
	10.2153	0
	10.2341	0
	10.2529	0
	10.2716	0
	10.2904	0
	10.3092	0
	10.3279	0
	10.3467	0
	10.3654	0
	10.3842	0
	10.403	0
	10.4217	0
	10.4405	0
	10.4593	0
	10.4781	0
	10.4969	0
	10.5157	0
	10.5345	0
	10.5533	0
	10.5721	0
	10.5909	0
	10.6097	0
	10.6285	0
	10.6473	0
	10.6661	0
	10.6849	0
	10.7037	0
	10.7225	0
	10.7413	0
	10.7601	0
	10.7789	0
	10.7977	0
	10.8165	0
	10.8353	0
	10.8541	0
	10.8729	0
	10.8917	0
	10.9105	0
	10.9293	0
	10.9481	0
	10.9668	0
	10.9856	0
	11.0044	0
	11.0231	0
	11.0419	0
	11.0607	0
	11.0794	0
	11.0982	0
	11.117	53409.2
	11.1358	0
	11.1545	0
	11.1733	0
	11.1921	0
	11.2109	0
	11.2296	0
	11.2484	0
	11.2671	0
	11.2859	0
	11.3047	0
	11.3234	0
	11.3422	0
	11.361	0
	11.3797	0
	11.3985	0
	11.4172	0
	11.436	0
	11.4547	0
	11.4735	0
	11.4923	0
	11.511	0
	11.5298	0
	11.5485	0
	11.5673	0
	11.5861	0
	11.6048	0
	11.6236	0
	11.6424	0
	11.6612	0
	11.68	0
	11.6988	0
	11.7175	0
	11.7363	0
	11.7551	0
	11.7739	0
	11.7926	0
	11.8114	0
	11.8301	0
	11.8489	0
	11.8677	0
	11.8864	0
	11.9051	0
	11.9239	0
	11.9426	0
	11.9613	0
	11.9801	0
	11.9989	0
	12.0176	0
	12.0364	0
	12.0551	0
	12.0739	0
	12.0927	0
	12.1114	0
	12.1302	0
	12.149	0
	12.1678	0
	12.1865	0
	12.2053	0
	12.2241	0
	12.2429	0
	12.2616	0
	12.2804	0
	12.2992	0
	12.3179	0
	12.3367	0
	12.3555	0
	12.3743	0
	12.3931	0
	12.4118	0
	12.4306	0
	12.4494	0
	12.4682	0
	12.4869	0
	12.5057	0
	12.5245	0
	12.5433	0
	12.562	0
	12.5808	0
	12.5996	0
	12.6184	0
	12.6372	0
	12.6559	0
	12.6747	0
	12.6935	0
	12.7123	0
	12.731	0
	12.7498	0
	12.7686	0
	12.7874	0
	12.8062	0
	12.8249	0
	12.8437	0
	12.8625	0
	12.8812	0
	12.9	0
	12.9188	0
	12.9376	0
	12.9564	0
	12.9751	0
	12.9939	0
	13.0127	0
	13.0314	0
	13.0502	0
	13.069	0
	13.0878	0
	13.1065	0
	13.1253	0
	13.1441	0
	13.1629	0
	13.1816	0
	13.2004	0
	13.2192	0
	13.2379	0
	13.2567	0
	13.2755	0
	13.2942	0
	13.313	0
	13.3318	0
	13.3506	0
	13.3694	0
	13.3881	0
	13.4069	0
	13.4256	0
	13.4444	0
	13.4632	0
	13.482	0
	13.5007	0
	13.5195	0
	13.5383	0
	13.557	0
	13.5758	0
	13.5946	0
	13.6134	0
	13.6321	0
	13.6509	0
	13.6697	0
	13.6884	0
	13.7072	0
	13.726	0
	13.7447	0
	13.7635	0
	13.7823	0
	13.8011	0
	13.8198	0
	13.8386	0
	13.8574	0
	13.8762	0
	13.8949	0
	13.9137	0
	13.9324	0
	13.9512	0
	13.97	0
	13.9887	0
	14.0075	0
	14.0263	0
	14.045	0
	14.0638	0
	14.0826	0
	14.1014	0
	14.1201	0
	14.1389	0
	14.1577	0
	14.1764	0
	14.1952	0
	14.214	0
	14.2327	0
	14.2515	0
	14.2703	0
	14.289	0
	14.3078	0
	14.3266	0
	14.3453	0
	14.3641	0
	14.3829	0
	14.4016	0
	14.4204	0
	14.4391	0
	14.4579	0
	14.4767	0
	14.4954	0
	14.5142	0
	14.533	0
	14.5518	0
	14.5707	0
	14.5895	0
	14.6082	0
	14.6302	0
	14.6524	0
	14.6746	0
	14.6968	0
	14.719	0
	14.7413	0
	14.7635	0
	14.7857	0
	14.8079	0
	14.8301	0
	14.8523	0
	14.8746	0
	14.8968	0
	14.919	0
	14.9412	0
	14.9634	0
	14.9856	0
	15.0079	0
	15.0301	0
	15.0523	0
	15.0745	0
	15.0968	0
	15.119	0
	15.1412	0
	15.1634	0
	15.1856	0
	15.2078	0
	15.2301	0
	15.2523	0
	15.273	0
	15.2921	0
	15.3108	0
	15.3295	0
	15.3481	0
	15.3667	0
	15.3853	0
	15.404	0
	15.4226	0
	15.4413	0
	15.4599	0
	15.4786	0
	15.4972	0
	15.5159	0
	15.5345	0
	15.5531	0
	15.5717	0
	15.5903	0
	15.6089	0
	15.6275	0
	15.6461	0
	15.6647	0
	15.6833	0
	15.7019	0
	15.7205	0
	15.7391	0
	15.7577	0
	15.7764	0
	15.795	0
	15.8136	0
	15.8323	0
	15.8525	0
	15.8746	0
	15.8968	0
	15.919	0
	15.9412	0
	15.9635	0
	15.9857	0
	16.0079	0
	16.0301	0
	16.0523	0
	16.0746	0
	16.0968	0
	16.119	0
	16.1412	0
	16.1635	0
	16.1857	0
	16.2079	0
	16.2301	0
	16.2523	0
	16.2746	0
	16.2968	0
	16.3176	0
	16.3398	0
	16.362	0
	16.3842	0
	16.4064	0
	16.4286	0
	16.4508	0
	16.4731	0
	16.4953	0
	16.5175	0
	16.5397	0
	16.5619	0
	16.5842	0
	16.6064	0
	16.6286	0
	16.6508	0
	16.673	0
	16.6953	0
	16.7175	0
	16.7397	0
	16.7619	0
	16.7841	0
	16.8063	0
	16.8286	0
	16.8508	0
	16.873	0
	16.8953	0
	16.9175	0
	16.9397	0
	16.9619	0
	16.9841	0
	17.0064	0
	17.0286	0
	17.0508	0
	17.073	0
	17.0952	0
	17.1175	0
	17.1397	0
	17.1619	0
	17.1841	0
	17.2063	0
	17.2285	0
	17.2508	0
	17.273	0
	17.2952	0
	17.3174	0
	17.3396	0
	17.3619	0
	17.3824	0
	17.4036	0
	17.4258	0
	17.448	0
	17.4703	0
	17.4925	0
	17.5147	0
	17.5369	0
	17.5591	0
	17.5814	0
	17.6036	0
	17.6242	0
	17.6458	0
	17.6681	0
	17.6903	0
	17.7125	0
	17.7347	0
	17.7553	0
	17.777	0
	17.7992	0
	17.8214	0
	17.842	0
	17.8641	0
	17.8863	0
	17.9085	0
	17.9291	0
	17.9504	0
	17.971	0
	17.9927	0
	18.0149	0
	18.0371	0
	18.0593	0
	18.0799	0
	18.101	0
	18.1232	0
	18.1454	0
	18.166	0
	18.1864	0
	18.2079	0
	18.2301	0
	18.2507	0
	18.2722	0
	18.2928	0
	18.3132	0
	18.3343	0
	18.3549	0
	18.3753	0
	18.3968	0
	18.419	0
	18.4412	0
	18.4635	0
	18.484	0
	18.5061	0
	18.5283	0
	18.5489	0
	18.5692	0
	18.5896	0
	18.61	0
	18.6313	0
	18.6518	0
	18.6722	0
	18.6943	0
	18.7166	0
	18.7371	0
	18.7575	0
	18.7796	0
	18.8002	0
	18.8206	0
	18.841	0
	18.8626	0
	18.8831	0
	18.9035	0
	18.9239	0
	18.9443	0
	18.9647	0
	18.9851	0
	19.0071	0
	19.0277	0
	19.048	0
	19.0684	0
	19.0889	0
	19.1101	0
	19.1307	0
	19.1511	0
	19.1715	0
	19.1919	0
	19.2123	0
	19.2327	0
	19.2531	0
	19.2749	0
	19.2954	0
	19.3158	0
	19.3362	0
	19.3566	0
	19.377	0
	19.3974	0
	19.4178	0
	19.4382	0
	19.4586	0
	19.479	0
	19.4994	0
	19.5198	0
	19.5402	0
	19.5606	0
	19.5827	0
	19.6033	0
	19.6237	0
	19.6441	0
	19.6645	0
	19.6849	0
	19.7053	0
	19.7257	0
	19.7461	0
	19.7665	0
	19.7869	0
	19.8073	0
	19.8277	0
	19.8481	0
	19.8685	0
	19.8889	0
	19.9093	0
	19.9297	0
	19.9501	0
	19.9705	0
	19.9909	0
	20.0113	0
	20.0317	0
	20.0521	0
	20.0725	0
	20.0929	0
	20.1134	0
	20.1337	0
	20.1541	0
	20.1745	0
	20.1949	0
	20.2153	0
	20.2358	0
	20.2562	0
	20.2766	0
	20.297	0
	20.3174	0
	20.3378	0
	20.3582	0
	20.3786	0
	20.399	0
	20.4194	0
	20.4398	0
	20.4602	0
	20.4806	0
	20.501	0
	20.5214	0
	20.5418	0
	20.5622	0
	20.5826	0
	20.603	0
	20.6234	0
	20.6438	0
	20.6642	0
	20.6846	0
	20.705	0
	20.7254	0
	20.7458	0
	20.7662	0
	20.7866	0
	20.807	0
	20.8274	0
	20.8478	0
	20.8682	0
	20.8886	0
	20.909	0
	20.9294	0
	20.9498	0
	20.9702	0
	20.9906	0
	21.011	0
	21.0314	0
	21.0518	0
	21.0722	0
	21.0926	0
	21.113	0
	21.1334	0
	21.1538	0
	21.1742	0
	21.1946	0
	21.215	0
	21.2355	0
	21.2558	0
	21.2763	0
	21.2966	0
	21.317	0
	21.3375	0
	21.3578	0
	21.3783	0
	21.3986	0
	21.419	0
	21.4395	0
	21.4599	0
	21.4803	0
	21.5007	0
	21.5211	0
	21.5415	0
	21.5619	0
	21.5823	0
	21.6027	0
	21.6231	0
	21.6435	0
	21.6639	0
	21.6843	0
	21.7047	0
	21.7251	0
	21.7455	0
	21.7659	0
	21.7862	0
	21.8066	0
	21.827	0
	21.8474	0
	21.8678	0
	21.8882	0
	21.9086	0
	21.929	0
	21.9494	0
	21.9698	0
	21.9902	0
	22.0106	0
	22.031	0
	22.0514	0
	22.0719	0
	22.0922	0
	22.1126	0
	22.1331	0
	22.1534	0
	22.1739	0
	22.1943	0
	22.2147	0
	22.2351	0
	22.2555	0
	22.2759	0
	22.2963	0
	22.3167	0
	22.3371	0
	22.3575	0
	22.3779	0
	22.3983	0
	22.4187	0
	22.4391	0
	22.4595	0
	22.48	0
	22.5004	0
	22.5208	0
	22.5412	0
	22.5616	0
	22.582	0
	22.6024	0
	22.6228	0
	22.6432	0
	22.6636	0
	22.684	0
	22.7044	0
	22.7248	0
	22.7452	0
	22.7656	0
	22.786	0
	22.8064	0
	22.8269	0
	22.8472	0
	22.8677	0
	22.8881	0
	22.9085	0
	22.9289	0
	22.9493	0
	22.9697	0
	22.9901	0
	23.0105	0
	23.0309	0
	23.0513	0
	23.0717	0
	23.0921	0
	23.1125	0
	23.1329	0
	23.1534	0
	23.1738	0
	23.1942	973.549
	23.2146	0
	23.235	0
	23.2554	0
	23.2758	0
	23.2962	0
	23.3166	0
	23.337	0
	23.3574	0
	23.3778	0
	23.3982	0
	23.4186	0
	23.4391	0
	23.4595	0
	23.4798	0
	23.5003	0
	23.5207	0
	23.5411	0
	23.5615	0
	23.5819	0
	23.6023	0
	23.6227	0
	23.6431	0
	23.6635	0
	23.6839	0
	23.7043	0
	23.7247	0
	23.7451	0
	23.7655	0
	23.7859	0
	23.8063	0
	23.8268	0
	23.8471	0
	23.8676	0
	23.8879	0
	23.9083	0
	23.9288	0
	23.9491	0
	23.9696	0
	23.99	0
	24.0103	0
	24.0308	0
	24.0512	0
	24.0716	0
	24.092	0
	24.1124	0
	24.1328	0
	24.1532	0
	24.1736	0
	24.194	0
	24.2144	0
	24.2348	0
	24.2552	0
	24.2756	0
	24.296	0
	24.3164	0
	24.3368	0
	24.3573	0
	24.3777	0
	24.3981	0
	24.4185	0
	24.4389	0
	24.4593	0
	24.4797	0
	24.5001	0
	24.5205	0
	24.5409	0
	24.5613	0
	24.5817	0
	24.6021	0
	24.6226	0
	24.6429	0
	24.6633	0
	24.6837	0
	24.7042	0
	24.7246	0
	24.745	0
	24.7654	0
	24.7858	0
	24.8062	0
	24.8266	0
	24.8469	0
	24.8674	0
	24.8878	0
	24.9082	0
	24.9286	0
	24.949	0
	24.9694	0
	24.9898	0
	25.0102	0
	25.0306	0
	25.051	0
	25.0714	0
	25.0918	0
	25.1122	0
	25.1326	0
	25.153	0
	25.1734	0
	25.1938	0
	25.2142	0
	25.2346	0
	25.255	0
	25.2754	0
	25.2958	0
	25.3162	0
	25.3366	0
	25.3571	0
	25.3774	0
	25.3979	0
	25.4183	0
	25.4386	0
	25.4591	0
	25.4795	0
	25.4999	0
	25.5203	0
	25.5407	0
	25.5611	0
	25.5815	0
	25.6019	0
	25.6223	0
	25.6427	0
	25.6631	0
	25.6835	0
	25.704	0
	25.7244	0
	25.7448	0
	25.7652	0
	25.7856	0
	25.806	0
	25.8264	0
	25.8468	0
	25.8672	0
	25.8876	0
	25.908	0
	25.9284	0
	25.9488	0
	25.9692	0
	25.9896	0
	26.01	0
	26.0304	0
	26.0508	0
	26.0712	0
	26.0917	0
	26.112	0
	26.1324	0
	26.1529	0
	26.1733	0
	26.1937	0
	26.2141	0
	26.2345	0
	26.2549	0
	26.2749	0
	26.2953	0
	26.3157	0
	26.3361	0
	26.3565	0
	26.3769	0
	26.3974	0
	26.4178	0
	26.4382	0
	26.4586	0
	26.479	0
	26.4994	0
	26.5198	0
	26.5402	0
	26.5606	0
	26.581	0
	26.6014	0
	26.6218	0
	26.6422	0
	26.6626	0
	26.683	0
	26.7034	0
	26.7238	0
	26.7442	0
	26.7646	0
	26.785	0
	26.8054	0
	26.8258	0
	26.8462	0
	26.8666	0
	26.8871	0
	26.9075	0
	26.9279	0
	26.9483	0
	26.9687	0
	26.9891	0
	27.0095	0

## Sheet: 1C
Figure 1 - Supplemental figure 1C
Lyso-PC (18:0)	Time (min)	Intensity
	0.003654	0
	0.025963	0
	0.046522	0
	0.06695	0
	0.087347	0
	0.107742	0
	0.128163	0
	0.148561	0
	0.168963	0
	0.189364	0
	0.20976	0
	0.230165	0
	0.250567	0
	0.270979	0
	0.291386	0
	0.311784	0
	0.332215	0
	0.352618	0
	0.373019	0
	0.393418	0
	0.413826	0
	0.434225	0
	0.454619	0
	0.475059	0
	0.495459	0
	0.515864	0
	0.53627	0
	0.556709	0
	0.577104	0
	0.597521	0
	0.617916	0
	0.638328	0
	0.658725	0
	0.679123	0
	0.699538	0
	0.719939	0
	0.740357	0
	0.760759	0
	0.781163	0
	0.801597	0
	0.82201	0
	0.842408	0
	0.862805	0
	0.883214	0
	0.903615	0
	0.924022	0
	0.944439	0
	0.964836	0
	0.985236	0
	1.00564	0
	1.02609	0
	1.04649	0
	1.06692	14210.4
	1.08567	143974
	1.10429	0
	1.12288	0
	1.14146	0
	1.16005	0
	1.17867	0
	1.1973	0
	1.21591	0
	1.23449	0
	1.25308	0
	1.27168	0
	1.29028	0
	1.30888	0
	1.32749	0
	1.34611	0
	1.36472	0
	1.38334	0
	1.40197	0
	1.42059	0
	1.43922	0
	1.45785	0
	1.47648	0
	1.49513	0
	1.51376	0
	1.53241	0
	1.55105	0
	1.5697	0
	1.58839	0
	1.60705	0
	1.62573	97793.5
	1.64439	114695
	1.66306	323677
	1.68172	573790
	1.7004	1020541
	1.71907	1450957
	1.73775	1889703
	1.75643	2607819
	1.77511	2649986
	1.79379	2805292
	1.81247	2508606
	1.83115	2562730
	1.84983	2319880
	1.86851	2105770
	1.88717	1563989
	1.90582	1463672
	1.92447	1325703
	1.94311	1303464
	1.96177	927752
	1.98042	660527
	1.99909	334466
	2.01781	130938
	2.03659	84970.6
	2.05539	38083.3
	2.07421	0
	2.09303	52154.1
	2.11186	40701.2
	2.13069	0
	2.14952	0
	2.16835	0
	2.18719	62550.3
	2.20601	0
	2.22484	0
	2.24366	35003.9
	2.26248	0
	2.2813	42696.4
	2.30012	0
	2.31893	0
	2.33772	34446.2
	2.35651	0
	2.37528	0
	2.39402	36086.1
	2.41275	0
	2.43149	36122.8
	2.45023	0
	2.46895	50244.3
	2.48767	0
	2.50641	0
	2.52514	0
	2.54386	43810.7
	2.56258	37925.1
	2.58129	0
	2.6	35161.5
	2.61873	36985.3
	2.63748	0
	2.6562	0
	2.67492	0
	2.69364	0
	2.71236	0
	2.73108	0
	2.74981	0
	2.76854	0
	2.78726	0
	2.80598	35776.1
	2.82469	0
	2.84341	0
	2.86214	0
	2.88086	0
	2.89958	0
	2.9183	0
	2.93701	0
	2.95573	0
	2.97445	0
	2.99317	0
	3.01188	0
	3.03059	0
	3.04931	0
	3.06803	0
	3.08674	36010.4
	3.10545	0
	3.1242	41488.2
	3.14292	0
	3.16164	0
	3.18036	0
	3.19907	0
	3.21778	0
	3.2365	0
	3.25522	0
	3.27394	0
	3.29266	0
	3.31137	0
	3.33009	0
	3.34881	0
	3.36754	0
	3.38627	0
	3.40501	0
	3.42374	0
	3.44249	0
	3.46126	0
	3.48003	0
	3.49882	0
	3.51764	0
	3.53645	0
	3.55527	0
	3.57409	0
	3.59292	0
	3.61176	0
	3.6306	0
	3.64944	0
	3.66829	0
	3.68714	0
	3.70599	0
	3.72484	0
	3.74369	0
	3.76254	0
	3.78139	0
	3.80027	0
	3.81912	0
	3.83795	0
	3.85681	0
	3.87566	0
	3.89451	0
	3.91337	0
	3.93224	0
	3.9511	0
	3.96997	0
	3.98884	0
	4.0077	0
	4.02658	0
	4.04545	0
	4.06433	0
	4.08321	0
	4.10208	0
	4.12096	0
	4.13984	0
	4.15871	0
	4.17761	0
	4.1965	0
	4.21538	0
	4.23426	0
	4.25315	0
	4.27203	0
	4.29093	0
	4.30982	0
	4.3287	0
	4.34759	0
	4.36648	0
	4.38536	0
	4.40423	0
	4.42313	0
	4.44199	0
	4.46083	0
	4.47968	0
	4.4985	0
	4.51732	0
	4.53615	0
	4.55499	0
	4.57381	0
	4.59264	0
	4.61148	0
	4.6303	0
	4.64914	0
	4.66797	0
	4.68682	0
	4.70568	0
	4.72453	0
	4.74339	0
	4.76229	0
	4.78118	0
	4.80008	0
	4.819	0
	4.8379	0
	4.85682	0
	4.87572	0
	4.89463	0
	4.91355	0
	4.93247	0
	4.95139	0
	4.97032	0
	4.98923	0
	5.00814	0
	5.02708	0
	5.04599	0
	5.06492	0
	5.08384	0
	5.10276	0
	5.12169	0
	5.1406	0
	5.15949	0
	5.17841	0
	5.19732	0
	5.21623	0
	5.23516	0
	5.25408	0
	5.27299	0
	5.2919	0
	5.31082	0
	5.32975	0
	5.34866	0
	5.36756	0
	5.38645	0
	5.40534	0
	5.42418	0
	5.44304	0
	5.46186	0
	5.48068	0
	5.49951	0
	5.51832	0
	5.53715	0
	5.55601	0
	5.57486	0
	5.59375	0
	5.61263	0
	5.63152	0
	5.65041	0
	5.66931	0
	5.68821	0
	5.70714	0
	5.72605	0
	5.74498	0
	5.7639	0
	5.7828	0
	5.80171	0
	5.82062	0
	5.83953	0
	5.85843	0
	5.87731	0
	5.89617	0
	5.915	0
	5.93384	0
	5.95265	0
	5.97147	0
	5.99029	0
	6.00915	0
	6.02801	0
	6.0469	0
	6.06582	0
	6.08472	0
	6.10362	0
	6.12253	0
	6.14143	0
	6.16034	0
	6.17927	0
	6.19818	0
	6.21709	0
	6.236	0
	6.25491	0
	6.27383	0
	6.29275	0
	6.31165	0
	6.33055	0
	6.34946	0
	6.36836	0
	6.38729	0
	6.4062	0
	6.42509	44166.9
	6.44398	0
	6.46286	0
	6.48173	0
	6.50063	0
	6.51953	0
	6.53839	0
	6.55725	0
	6.57613	0
	6.595	0
	6.61389	0
	6.63276	0
	6.65161	0
	6.67048	0
	6.68934	0
	6.70819	0
	6.72701	0
	6.74583	0
	6.76464	0
	6.78344	0
	6.80224	0
	6.82102	0
	6.8398	0
	6.85858	0
	6.87736	0
	6.89614	0
	6.91492	0
	6.93369	0
	6.95245	0
	6.97125	0
	6.99001	0
	7.00877	0
	7.02755	0
	7.0463	0
	7.06505	0
	7.0838	0
	7.10254	0
	7.12126	0
	7.13998	0
	7.15869	0
	7.17739	0
	7.19608	0
	7.21477	0
	7.23346	0
	7.25217	0
	7.27085	0
	7.28955	0
	7.30824	0
	7.32696	0
	7.34571	0
	7.36447	0
	7.38326	0
	7.40207	0
	7.42094	0
	7.43981	0
	7.45869	0
	7.47755	29451.9
	7.49639	0
	7.51523	0
	7.53403	0
	7.55281	0
	7.57158	0
	7.59034	0
	7.60909	0
	7.62781	0
	7.64653	0
	7.66525	0
	7.68396	0
	7.70266	0
	7.72138	0
	7.74009	0
	7.75879	0
	7.77751	0
	7.79623	0
	7.81496	0
	7.83369	0
	7.85243	0
	7.87116	0
	7.88992	0
	7.9087	0
	7.92746	0
	7.94622	0
	7.96499	0
	7.98375	0
	8.00252	0
	8.02128	0
	8.04004	0
	8.05881	0
	8.07757	0
	8.09633	0
	8.1151	0
	8.13387	0
	8.15265	0
	8.17141	0
	8.19017	0
	8.20893	0
	8.22771	0
	8.24648	0
	8.26525	0
	8.28402	0
	8.30279	0
	8.3215	0
	8.34027	0
	8.35906	0
	8.37783	0
	8.39663	0
	8.41544	0
	8.43421	0
	8.45298	0
	8.47173	0
	8.49048	0
	8.50923	0
	8.52796	0
	8.54669	0
	8.56543	0
	8.58417	0
	8.6029	0
	8.62166	0
	8.64041	0
	8.65916	0
	8.67791	0
	8.69669	0
	8.71544	0
	8.7342	0
	8.75296	0
	8.77172	0
	8.79048	0
	8.80924	0
	8.828	0
	8.84677	0
	8.86554	0
	8.88431	0
	8.90307	0
	8.9218	0
	8.94051	0
	8.95922	0
	8.97788	0
	8.99653	0
	9.01518	0
	9.03383	0
	9.05248	0
	9.07114	0
	9.08978	0
	9.10845	0
	9.12711	0
	9.14579	0
	9.16448	0
	9.18318	0
	9.20189	0
	9.22061	0
	9.23933	0
	9.2581	0
	9.27685	0
	9.29559	0
	9.31433	0
	9.3331	0
	9.35185	0
	9.37061	0
	9.38936	0
	9.40811	0
	9.42686	0
	9.44561	0
	9.46436	0
	9.48311	0
	9.50186	0
	9.52061	0
	9.53936	0
	9.55815	0
	9.57691	0
	9.59566	0
	9.61444	0
	9.6332	0
	9.65196	0
	9.67072	0
	9.68948	0
	9.70824	0
	9.727	0
	9.74577	0
	9.76454	0
	9.78329	0
	9.80205	0
	9.82085	0
	9.83962	0
	9.8584	0
	9.87717	0
	9.89595	0
	9.91472	0
	9.9335	0
	9.95227	0
	9.97105	0
	9.98982	0
	10.0086	0
	10.0274	0
	10.0462	0
	10.065	0
	10.0838	0
	10.1026	0
	10.1214	0
	10.1402	0
	10.159	0
	10.1777	0
	10.1965	0
	10.2153	0
	10.2341	0
	10.2529	0
	10.2716	0
	10.2904	0
	10.3092	0
	10.3279	0
	10.3467	0
	10.3654	0
	10.3842	0
	10.403	0
	10.4217	0
	10.4405	0
	10.4593	0
	10.4781	0
	10.4969	0
	10.5157	0
	10.5345	0
	10.5533	0
	10.5721	0
	10.5909	0
	10.6097	0
	10.6285	0
	10.6473	0
	10.6661	0
	10.6849	0
	10.7037	0
	10.7225	0
	10.7413	0
	10.7601	0
	10.7789	0
	10.7977	0
	10.8165	0
	10.8353	0
	10.8541	0
	10.8729	0
	10.8917	0
	10.9105	0
	10.9293	0
	10.9481	0
	10.9668	0
	10.9856	0
	11.0044	0
	11.0231	0
	11.0419	0
	11.0607	0
	11.0794	0
	11.0982	0
	11.117	0
	11.1358	0
	11.1545	0
	11.1733	0
	11.1921	0
	11.2109	0
	11.2296	0
	11.2484	0
	11.2671	0
	11.2859	0
	11.3047	0
	11.3234	0
	11.3422	0
	11.361	0
	11.3797	0
	11.3985	0
	11.4172	0
	11.436	0
	11.4547	0
	11.4735	0
	11.4923	0
	11.511	0
	11.5298	0
	11.5485	0
	11.5673	0
	11.5861	0
	11.6048	0
	11.6236	0
	11.6424	0
	11.6612	0
	11.68	0
	11.6988	0
	11.7175	0
	11.7363	0
	11.7551	0
	11.7739	0
	11.7926	0
	11.8114	0
	11.8301	0
	11.8489	0
	11.8677	0
	11.8864	0
	11.9051	0
	11.9239	0
	11.9426	0
	11.9613	0
	11.9801	0
	11.9989	0
	12.0176	0
	12.0364	0
	12.0551	0
	12.0739	0
	12.0927	0
	12.1114	0
	12.1302	0
	12.149	0
	12.1678	0
	12.1865	0
	12.2053	0
	12.2241	0
	12.2429	0
	12.2616	0
	12.2804	0
	12.2992	0
	12.3179	0
	12.3367	0
	12.3555	0
	12.3743	0
	12.3931	0
	12.4118	0
	12.4306	0
	12.4494	0
	12.4682	0
	12.4869	0
	12.5057	0
	12.5245	0
	12.5433	0
	12.562	0
	12.5808	0
	12.5996	0
	12.6184	0
	12.6372	0
	12.6559	0
	12.6747	0
	12.6935	0
	12.7123	0
	12.731	0
	12.7498	0
	12.7686	0
	12.7874	0
	12.8062	0
	12.8249	0
	12.8437	0
	12.8625	0
	12.8812	0
	12.9	0
	12.9188	0
	12.9376	0
	12.9564	0
	12.9751	0
	12.9939	0
	13.0127	0
	13.0314	0
	13.0502	0
	13.069	0
	13.0878	0
	13.1065	0
	13.1253	0
	13.1441	0
	13.1629	0
	13.1816	0
	13.2004	0
	13.2192	0
	13.2379	0
	13.2567	0
	13.2755	0
	13.2942	0
	13.313	0
	13.3318	0
	13.3506	0
	13.3694	0
	13.3881	0
	13.4069	0
	13.4256	0
	13.4444	0
	13.4632	0
	13.482	0
	13.5007	0
	13.5195	0
	13.5383	0
	13.557	0
	13.5758	0
	13.5946	0
	13.6134	0
	13.6321	0
	13.6509	0
	13.6697	0
	13.6884	0
	13.7072	0
	13.726	0
	13.7447	0
	13.7635	0
	13.7823	0
	13.8011	0
	13.8198	0
	13.8386	0
	13.8574	0
	13.8762	0
	13.8949	0
	13.9137	0
	13.9324	0
	13.9512	0
	13.97	0
	13.9887	0
	14.0075	0
	14.0263	0
	14.045	0
	14.0638	0
	14.0826	0
	14.1014	0
	14.1201	0
	14.1389	0
	14.1577	0
	14.1764	0
	14.1952	0
	14.214	0
	14.2327	0
	14.2515	0
	14.2703	0
	14.289	0
	14.3078	0
	14.3266	0
	14.3453	0
	14.3641	0
	14.3829	0
	14.4016	0
	14.4204	0
	14.4391	0
	14.4579	0
	14.4767	0
	14.4954	0
	14.5142	0
	14.533	0
	14.5518	0
	14.5707	0
	14.5895	0
	14.6082	0
	14.6302	0
	14.6524	0
	14.6746	0
	14.6968	0
	14.719	0
	14.7413	0
	14.7635	0
	14.7857	0
	14.8079	0
	14.8301	0
	14.8523	0
	14.8746	0
	14.8968	0
	14.919	0
	14.9412	0
	14.9634	0
	14.9856	0
	15.0079	0
	15.0301	0
	15.0523	0
	15.0745	0
	15.0968	0
	15.119	0
	15.1412	0
	15.1634	0
	15.1856	0
	15.2078	0
	15.2301	0
	15.2523	0
	15.273	0
	15.2921	0
	15.3108	0
	15.3295	0
	15.3481	0
	15.3667	0
	15.3853	0
	15.404	0
	15.4226	0
	15.4413	0
	15.4599	0
	15.4786	0
	15.4972	0
	15.5159	0
	15.5345	0
	15.5531	0
	15.5717	0
	15.5903	0
	15.6089	0
	15.6275	0
	15.6461	0
	15.6647	0
	15.6833	0
	15.7019	0
	15.7205	0
	15.7391	0
	15.7577	0
	15.7764	0
	15.795	0
	15.8136	0
	15.8323	0
	15.8525	0
	15.8746	0
	15.8968	0
	15.919	0
	15.9412	0
	15.9635	0
	15.9857	0
	16.0079	0
	16.0301	0
	16.0523	0
	16.0746	0
	16.0968	0
	16.119	0
	16.1412	0
	16.1635	0
	16.1857	0
	16.2079	0
	16.2301	0
	16.2523	0
	16.2746	0
	16.2968	0
	16.3176	0
	16.3398	0
	16.362	0
	16.3842	0
	16.4064	0
	16.4286	0
	16.4508	0
	16.4731	0
	16.4953	0
	16.5175	0
	16.5397	0
	16.5619	0
	16.5842	0
	16.6064	0
	16.6286	0
	16.6508	0
	16.673	0
	16.6953	0
	16.7175	0
	16.7397	0
	16.7619	0
	16.7841	0
	16.8063	0
	16.8286	0
	16.8508	0
	16.873	0
	16.8953	0
	16.9175	0
	16.9397	0
	16.9619	0
	16.9841	0
	17.0064	0
	17.0286	0
	17.0508	0
	17.073	0
	17.0952	0
	17.1175	0
	17.1397	0
	17.1619	0
	17.1841	0
	17.2063	0
	17.2285	0
	17.2508	0
	17.273	0
	17.2952	0
	17.3174	0
	17.3396	0
	17.3619	0
	17.3824	0
	17.4036	0
	17.4258	0
	17.448	0
	17.4703	0
	17.4925	0
	17.5147	0
	17.5369	0
	17.5591	0
	17.5814	0
	17.6036	0
	17.6242	0
	17.6458	0
	17.6681	0
	17.6903	0
	17.7125	0
	17.7347	0
	17.7553	0
	17.777	0
	17.7992	0
	17.8214	0
	17.842	0
	17.8641	0
	17.8863	0
	17.9085	0
	17.9291	0
	17.9504	0
	17.971	0
	17.9927	0
	18.0149	0
	18.0371	0
	18.0593	0
	18.0799	0
	18.101	0
	18.1232	0
	18.1454	0
	18.166	0
	18.1864	0
	18.2079	0
	18.2301	0
	18.2507	0
	18.2722	0
	18.2928	0
	18.3132	0
	18.3343	0
	18.3549	0
	18.3753	0
	18.3968	0
	18.419	0
	18.4412	0
	18.4635	0
	18.484	0
	18.5061	0
	18.5283	0
	18.5489	0
	18.5692	0
	18.5896	0
	18.61	0
	18.6313	0
	18.6518	0
	18.6722	0
	18.6943	0
	18.7166	0
	18.7371	0
	18.7575	0
	18.7796	0
	18.8002	0
	18.8206	0
	18.841	0
	18.8626	0
	18.8831	0
	18.9035	0
	18.9239	0
	18.9443	0
	18.9647	0
	18.9851	0
	19.0071	0
	19.0277	0
	19.048	0
	19.0684	0
	19.0889	0
	19.1101	0
	19.1307	0
	19.1511	0
	19.1715	0
	19.1919	0
	19.2123	0
	19.2327	0
	19.2531	0
	19.2749	0
	19.2954	0
	19.3158	0
	19.3362	0
	19.3566	0
	19.377	0
	19.3974	0
	19.4178	0
	19.4382	0
	19.4586	0
	19.479	0
	19.4994	0
	19.5198	0
	19.5402	0
	19.5606	0
	19.5827	0
	19.6033	0
	19.6237	0
	19.6441	0
	19.6645	0
	19.6849	0
	19.7053	0
	19.7257	0
	19.7461	0
	19.7665	0
	19.7869	0
	19.8073	0
	19.8277	0
	19.8481	0
	19.8685	0
	19.8889	0
	19.9093	0
	19.9297	0
	19.9501	0
	19.9705	0
	19.9909	0
	20.0113	0
	20.0317	0
	20.0521	0
	20.0725	0
	20.0929	0
	20.1134	0
	20.1337	0
	20.1541	0
	20.1745	0
	20.1949	0
	20.2153	0
	20.2358	0
	20.2562	0
	20.2766	0
	20.297	0
	20.3174	0
	20.3378	0
	20.3582	0
	20.3786	0
	20.399	0
	20.4194	0
	20.4398	0
	20.4602	0
	20.4806	0
	20.501	0
	20.5214	0
	20.5418	0
	20.5622	0
	20.5826	0
	20.603	0
	20.6234	0
	20.6438	0
	20.6642	0
	20.6846	0
	20.705	0
	20.7254	0
	20.7458	0
	20.7662	0
	20.7866	0
	20.807	0
	20.8274	0
	20.8478	0
	20.8682	0
	20.8886	0
	20.909	0
	20.9294	0
	20.9498	0
	20.9702	0
	20.9906	0
	21.011	0
	21.0314	0
	21.0518	0
	21.0722	0
	21.0926	0
	21.113	0
	21.1334	0
	21.1538	0
	21.1742	0
	21.1946	0
	21.215	0
	21.2355	0
	21.2558	0
	21.2763	0
	21.2966	0
	21.317	0
	21.3375	0
	21.3578	0
	21.3783	0
	21.3986	0
	21.419	0
	21.4395	0
	21.4599	0
	21.4803	0
	21.5007	0
	21.5211	0
	21.5415	0
	21.5619	0
	21.5823	0
	21.6027	0
	21.6231	0
	21.6435	0
	21.6639	0
	21.6843	0
	21.7047	0
	21.7251	0
	21.7455	0
	21.7659	0
	21.7862	0
	21.8066	0
	21.827	0
	21.8474	0
	21.8678	0
	21.8882	0
	21.9086	0
	21.929	0
	21.9494	0
	21.9698	0
	21.9902	0
	22.0106	0
	22.031	0
	22.0514	0
	22.0719	0
	22.0922	0
	22.1126	0
	22.1331	0
	22.1534	0
	22.1739	0
	22.1943	0
	22.2147	0
	22.2351	0
	22.2555	0
	22.2759	0
	22.2963	0
	22.3167	0
	22.3371	0
	22.3575	0
	22.3779	0
	22.3983	0
	22.4187	0
	22.4391	0
	22.4595	0
	22.48	0
	22.5004	0
	22.5208	0
	22.5412	0
	22.5616	0
	22.582	0
	22.6024	0
	22.6228	0
	22.6432	0
	22.6636	0
	22.684	0
	22.7044	0
	22.7248	0
	22.7452	0
	22.7656	0
	22.786	0
	22.8064	0
	22.8269	0
	22.8472	0
	22.8677	0
	22.8881	0
	22.9085	0
	22.9289	0
	22.9493	0
	22.9697	0
	22.9901	0
	23.0105	0
	23.0309	0
	23.0513	0
	23.0717	0
	23.0921	0
	23.1125	0
	23.1329	0
	23.1534	0
	23.1738	0
	23.1942	0
	23.2146	0
	23.235	0
	23.2554	0
	23.2758	0
	23.2962	0
	23.3166	0
	23.337	0
	23.3574	0
	23.3778	0
	23.3982	0
	23.4186	0
	23.4391	0
	23.4595	0
	23.4798	0
	23.5003	0
	23.5207	0
	23.5411	0
	23.5615	0
	23.5819	0
	23.6023	0
	23.6227	0
	23.6431	0
	23.6635	0
	23.6839	0
	23.7043	0
	23.7247	0
	23.7451	0
	23.7655	0
	23.7859	0
	23.8063	0
	23.8268	0
	23.8471	0
	23.8676	0
	23.8879	0
	23.9083	0
	23.9288	0
	23.9491	0
	23.9696	0
	23.99	0
	24.0103	0
	24.0308	0
	24.0512	0
	24.0716	0
	24.092	0
	24.1124	0
	24.1328	0
	24.1532	0
	24.1736	0
	24.194	0
	24.2144	0
	24.2348	0
	24.2552	0
	24.2756	0
	24.296	0
	24.3164	0
	24.3368	0
	24.3573	0
	24.3777	0
	24.3981	0
	24.4185	0
	24.4389	0
	24.4593	0
	24.4797	0
	24.5001	0
	24.5205	0
	24.5409	0
	24.5613	0
	24.5817	0
	24.6021	0
	24.6226	0
	24.6429	0
	24.6633	0
	24.6837	0
	24.7042	0
	24.7246	0
	24.745	0
	24.7654	0
	24.7858	0
	24.8062	0
	24.8266	0
	24.8469	0
	24.8674	0
	24.8878	0
	24.9082	0
	24.9286	0
	24.949	0
	24.9694	0
	24.9898	0
	25.0102	0
	25.0306	0
	25.051	0
	25.0714	0
	25.0918	0
	25.1122	0
	25.1326	0
	25.153	0
	25.1734	0
	25.1938	0
	25.2142	0
	25.2346	0
	25.255	0
	25.2754	0
	25.2958	0
	25.3162	0
	25.3366	0
	25.3571	0
	25.3774	0
	25.3979	0
	25.4183	0
	25.4386	0
	25.4591	0
	25.4795	0
	25.4999	0
	25.5203	0
	25.5407	0
	25.5611	0
	25.5815	0
	25.6019	0
	25.6223	0
	25.6427	0
	25.6631	0
	25.6835	0
	25.704	0
	25.7244	0
	25.7448	0
	25.7652	0
	25.7856	0
	25.806	0
	25.8264	0
	25.8468	0
	25.8672	0
	25.8876	0
	25.908	0
	25.9284	0
	25.9488	0
	25.9692	0
	25.9896	0
	26.01	0
	26.0304	0
	26.0508	0
	26.0712	0
	26.0917	0
	26.112	0
	26.1324	0
	26.1529	0
	26.1733	0
	26.1937	0
	26.2141	0
	26.2345	0
	26.2549	0
	26.2749	0
	26.2953	0
	26.3157	0
	26.3361	0
	26.3565	0
	26.3769	0
	26.3974	0
	26.4178	0
	26.4382	0
	26.4586	0
	26.479	0
	26.4994	0
	26.5198	0
	26.5402	0
	26.5606	0
	26.581	0
	26.6014	0
	26.6218	0
	26.6422	0
	26.6626	0
	26.683	0
	26.7034	0
	26.7238	0
	26.7442	0
	26.7646	0
	26.785	0
	26.8054	0
	26.8258	0
	26.8462	0
	26.8666	0
	26.8871	0
	26.9075	0
	26.9279	0
	26.9483	0
	26.9687	0
	26.9891	0
	27.0095	0

## Sheet: 1D
Figure 1 - supplemental figure 1D
Lyso-PE(20:4)	Time (min)	Intensity
	0.003667	0
	0.025985	0
	0.048199	0
	0.070414	0
	0.090985	0
	0.111389	0
	0.131792	0
	0.152224	0
	0.172624	0
	0.193028	0
	0.213436	0
	0.233854	0
	0.254252	0
	0.27466	0
	0.29506	0
	0.315454	0
	0.335861	0
	0.356253	0
	0.37665	0
	0.39706	0
	0.417468	0
	0.43789	0
	0.458289	0
	0.478685	0
	0.499081	0
	0.519485	0
	0.539883	0
	0.560277	0
	0.580681	0
	0.601076	0
	0.621479	0
	0.641912	0
	0.662307	0
	0.682711	0
	0.703108	0
	0.723502	0
	0.743908	0
	0.764301	0
	0.7847	0
	0.805105	0
	0.825504	0
	0.845919	0
	0.866321	0
	0.88672	0
	0.907119	0
	0.927522	0
	0.947919	0
	0.968316	0
	0.988717	0
	1.00912	0
	1.02952	0
	1.04995	0
	1.07035	0
	1.08911	0
	1.10771	0
	1.1263	0
	1.14491	0
	1.16351	0
	1.18212	0
	1.20072	0
	1.21932	0
	1.23793	0
	1.25653	0
	1.27514	0
	1.29374	0
	1.31235	0
	1.33096	0
	1.34957	0
	1.3682	0
	1.38685	0
	1.40548	0
	1.42412	0
	1.44274	0
	1.46137	0
	1.48002	0
	1.49867	0
	1.51732	0
	1.53596	0
	1.55461	0
	1.57327	0
	1.59195	0
	1.61062	0
	1.6293	0
	1.64799	0
	1.66667	0
	1.68534	0
	1.70402	0
	1.72271	0
	1.7414	0
	1.7601	0
	1.7788	0
	1.79749	0
	1.8162	59182.3
	1.8349	106634
	1.85362	109702
	1.87231	229973
	1.89099	247016
	1.90967	302545
	1.92835	271802
	1.94702	235229
	1.9657	149346
	1.98438	152429
	2.00306	0
	2.02175	0
	2.04052	0
	2.05932	0
	2.07813	0
	2.09695	0
	2.11577	0
	2.13462	0
	2.15347	0
	2.17229	0
	2.19114	0
	2.20997	0
	2.2288	0
	2.24763	0
	2.26646	0
	2.28529	0
	2.3041	0
	2.32289	0
	2.34168	0
	2.36045	0
	2.37922	0
	2.39797	0
	2.41672	0
	2.43546	0
	2.45419	0
	2.47294	0
	2.49168	0
	2.5104	0
	2.52914	0
	2.54787	0
	2.56659	0
	2.58534	0
	2.60408	0
	2.62281	0
	2.64154	0
	2.66026	0
	2.67898	0
	2.69774	0
	2.71646	0
	2.73518	0
	2.7539	0
	2.77262	0
	2.79135	0
	2.81007	0
	2.82878	0
	2.8475	0
	2.86622	0
	2.88493	0
	2.90364	0
	2.92236	0
	2.94107	0
	2.95979	0
	2.97851	0
	2.99723	0
	3.01594	0
	3.03466	0
	3.05341	0
	3.07212	0
	3.09084	0
	3.10956	0
	3.12827	0
	3.14699	0
	3.16573	0
	3.18445	0
	3.20317	0
	3.22189	0
	3.2406	0
	3.25932	0
	3.27803	0
	3.29676	0
	3.31548	0
	3.33421	0
	3.35294	0
	3.37168	0
	3.39043	0
	3.40917	0
	3.42792	0
	3.4467	0
	3.46552	0
	3.48432	0
	3.50314	0
	3.52195	0
	3.54078	0
	3.55961	0
	3.57844	0
	3.59729	0
	3.61616	0
	3.635	0
	3.65386	0
	3.67271	0
	3.69155	0
	3.71041	0
	3.72926	0
	3.74812	0
	3.76697	0
	3.78583	0
	3.80468	0
	3.82354	0
	3.84239	0
	3.86126	0
	3.88016	0
	3.89902	0
	3.91788	0
	3.93677	0
	3.95565	0
	3.97452	0
	3.9934	0
	4.0123	0
	4.03118	0
	4.05006	0
	4.06895	0
	4.08783	0
	4.10672	0
	4.12561	0
	4.14451	0
	4.16339	0
	4.18227	0
	4.20116	0
	4.22005	0
	4.23898	0
	4.25787	0
	4.27677	0
	4.29566	0
	4.31455	0
	4.33345	0
	4.35234	0
	4.37122	0
	4.39012	0
	4.40899	0
	4.42785	0
	4.44671	0
	4.46556	0
	4.4844	0
	4.50323	0
	4.52206	0
	4.5409	0
	4.55973	0
	4.57856	0
	4.5974	0
	4.61626	0
	4.63511	0
	4.65397	0
	4.67283	0
	4.69171	0
	4.7106	0
	4.72951	0
	4.7484	0
	4.7673	0
	4.78621	0
	4.80512	0
	4.82404	0
	4.84295	0
	4.86188	0
	4.88081	0
	4.89973	0
	4.91866	0
	4.93759	0
	4.95651	0
	4.97544	0
	4.99437	0
	5.01329	0
	5.03226	0
	5.05119	0
	5.07012	0
	5.08905	0
	5.10798	0
	5.12693	0
	5.14586	0
	5.16479	0
	5.18371	0
	5.20264	0
	5.22161	0
	5.24055	0
	5.25949	0
	5.27842	0
	5.29735	0
	5.31629	0
	5.33522	0
	5.35415	0
	5.37306	0
	5.39195	0
	5.4108	0
	5.42965	0
	5.44848	0
	5.46729	0
	5.48609	0
	5.5049	0
	5.52372	0
	5.54256	0
	5.56142	0
	5.5803	0
	5.59918	0
	5.61808	0
	5.63698	0
	5.65591	0
	5.67481	0
	5.69372	0
	5.71265	0
	5.73156	0
	5.75047	0
	5.76938	0
	5.78832	0
	5.80724	0
	5.82617	0
	5.84509	0
	5.86399	0
	5.88287	0
	5.90174	0
	5.92055	0
	5.93936	0
	5.95817	0
	5.97699	0
	5.99584	0
	6.0147	0
	6.03358	0
	6.05252	0
	6.07142	0
	6.09034	0
	6.10926	0
	6.12817	0
	6.14708	0
	6.16602	0
	6.18494	0
	6.20387	0
	6.22279	0
	6.24171	0
	6.26063	0
	6.27956	0
	6.29847	0
	6.31738	0
	6.33628	0
	6.3552	0
	6.37412	0
	6.39304	0
	6.41196	0
	6.43086	0
	6.44976	0
	6.46865	0
	6.48755	0
	6.50644	0
	6.52533	0
	6.54421	0
	6.5631	0
	6.58198	0
	6.60086	0
	6.61974	0
	6.63861	0
	6.65747	0
	6.67632	0
	6.6952	0
	6.71405	0
	6.73288	0
	6.75171	0
	6.77051	0
	6.78933	0
	6.80812	0
	6.82691	0
	6.84573	0
	6.86451	0
	6.88329	0
	6.90208	0
	6.92085	0
	6.93962	0
	6.95839	0
	6.97715	0
	6.99592	0
	7.01469	0
	7.03346	0
	7.05221	0
	7.07096	0
	7.0897	0
	7.10845	0
	7.12717	0
	7.14588	0
	7.16458	0
	7.18328	0
	7.20197	0
	7.22066	0
	7.23935	0
	7.25805	0
	7.27676	0
	7.29546	0
	7.31415	0
	7.33288	0
	7.35164	0
	7.37041	0
	7.38921	0
	7.40806	0
	7.42694	0
	7.44586	0
	7.46473	0
	7.48358	0
	7.50242	0
	7.52123	0
	7.54002	0
	7.55881	0
	7.57757	0
	7.59632	0
	7.61505	0
	7.6338	0
	7.65253	0
	7.67125	0
	7.68996	0
	7.70866	0
	7.72738	0
	7.74609	0
	7.76483	0
	7.78354	0
	7.80227	0
	7.82099	0
	7.83973	0
	7.85848	0
	7.87723	0
	7.89599	0
	7.91474	0
	7.93349	0
	7.95225	0
	7.97102	0
	7.98979	0
	8.00858	0
	8.02735	0
	8.04612	0
	8.06489	0
	8.08366	0
	8.10242	0
	8.1212	0
	8.13997	0
	8.15873	0
	8.17752	0
	8.19628	0
	8.21504	0
	8.23382	0
	8.25261	0
	8.27138	0
	8.2902	0
	8.30898	0
	8.32776	0
	8.34655	0
	8.36534	0
	8.38412	0
	8.40289	0
	8.42165	0
	8.44042	0
	8.45921	0
	8.47795	0
	8.4967	0
	8.51544	0
	8.53418	0
	8.55294	0
	8.57169	0
	8.59044	0
	8.60919	0
	8.62796	0
	8.64672	0
	8.66547	0
	8.68424	0
	8.70299	0
	8.72175	0
	8.74053	0
	8.75932	0
	8.77807	0
	8.79685	0
	8.81561	0
	8.83438	0
	8.85316	0
	8.87193	0
	8.8907	0
	8.90946	0
	8.92819	0
	8.94691	0
	8.96561	0
	8.98427	0
	9.00291	0
	9.02157	0
	9.04022	0
	9.05888	0
	9.07755	0
	9.09622	0
	9.1149	0
	9.13359	0
	9.15228	0
	9.17098	0
	9.18971	0
	9.20843	0
	9.22716	0
	9.24593	0
	9.26468	0
	9.28342	0
	9.30217	0
	9.32094	0
	9.3397	0
	9.35846	0
	9.37721	0
	9.39596	0
	9.41471	0
	9.43345	0
	9.4522	0
	9.47096	0
	9.48971	0
	9.50846	0
	9.52722	0
	9.546	0
	9.56476	0
	9.58353	0
	9.60231	0
	9.62107	0
	9.63983	0
	9.6586	0
	9.67736	0
	9.69613	0
	9.7149	0
	9.73367	0
	9.75244	0
	9.77121	0
	9.79001	0
	9.80878	0
	9.82755	0
	9.84634	0
	9.86512	0
	9.88389	0
	9.90267	0
	9.92145	0
	9.94023	0
	9.95901	0
	9.97777	0
	9.99655	0
	10.0153	0
	10.0341	0
	10.0529	0
	10.0717	0
	10.0905	0
	10.1093	0
	10.1281	0
	10.1469	0
	10.1657	0
	10.1845	0
	10.2033	0
	10.2221	0
	10.2408	0
	10.2596	0
	10.2783	0
	10.2971	0
	10.3158	0
	10.3346	0
	10.3534	0
	10.3721	0
	10.3909	0
	10.4097	0
	10.4285	0
	10.4473	0
	10.4661	0
	10.4849	0
	10.5037	0
	10.5224	0
	10.5412	0
	10.5601	0
	10.5788	0
	10.5976	0
	10.6164	0
	10.6352	0
	10.6541	0
	10.6729	0
	10.6917	0
	10.7105	0
	10.7293	0
	10.7481	0
	10.7669	0
	10.7857	0
	10.8044	0
	10.8232	0
	10.8421	0
	10.8609	0
	10.8796	0
	10.8985	0
	10.9172	0
	10.936	0
	10.9548	0
	10.9736	0
	10.9924	0
	11.0112	0
	11.0299	0
	11.0487	0
	11.0675	0
	11.0863	0
	11.1051	0
	11.1238	0
	11.1426	0
	11.1614	0
	11.1801	0
	11.1989	0
	11.2177	0
	11.2364	0
	11.2552	0
	11.2739	0
	11.2927	0
	11.3115	0
	11.3302	0
	11.349	0
	11.3678	0
	11.3865	0
	11.4053	0
	11.424	0
	11.4428	0
	11.4615	0
	11.4803	0
	11.499	0
	11.5178	0
	11.5366	0
	11.5553	0
	11.5741	0
	11.5929	0
	11.6117	0
	11.6305	0
	11.6493	0
	11.6681	0
	11.6868	0
	11.7056	0
	11.7244	0
	11.7432	0
	11.7619	0
	11.7807	0
	11.7995	0
	11.8182	0
	11.837	0
	11.8557	0
	11.8745	0
	11.8932	0
	11.912	0
	11.9307	0
	11.9495	0
	11.9682	0
	11.987	0
	12.0057	0
	12.0245	0
	12.0432	0
	12.062	0
	12.0808	0
	12.0996	0
	12.1183	0
	12.1371	0
	12.1559	0
	12.1746	0
	12.1934	0
	12.2122	0
	12.231	0
	12.2497	0
	12.2685	0
	12.2873	0
	12.3061	0
	12.3248	0
	12.3436	0
	12.3624	0
	12.3811	0
	12.3999	0
	12.4187	0
	12.4375	0
	12.4563	0
	12.475	0
	12.4938	0
	12.5126	0
	12.5314	0
	12.5501	0
	12.5689	0
	12.5877	0
	12.6065	0
	12.6252	0
	12.644	0
	12.6628	0
	12.6816	0
	12.7004	0
	12.7191	0
	12.7379	0
	12.7567	0
	12.7755	0
	12.7943	0
	12.8131	0
	12.8318	0
	12.8506	0
	12.8694	0
	12.8881	0
	12.9069	0
	12.9257	0
	12.9445	0
	12.9633	0
	12.982	0
	13.0008	0
	13.0196	0
	13.0384	0
	13.0572	0
	13.076	0
	13.0947	0
	13.1135	0
	13.1323	0
	13.151	0
	13.1698	0
	13.1886	0
	13.2073	0
	13.2261	0
	13.2449	0
	13.2637	0
	13.2825	0
	13.3012	0
	13.32	0
	13.3388	0
	13.3575	0
	13.3763	0
	13.3951	0
	13.4138	0
	13.4326	0
	13.4514	0
	13.4702	0
	13.4889	0
	13.5077	0
	13.5265	0
	13.5453	0
	13.564	0
	13.5828	0
	13.6016	0
	13.6203	0
	13.6391	0
	13.6579	0
	13.6766	0
	13.6954	0
	13.7142	0
	13.7329	0
	13.7517	0
	13.7705	0
	13.7893	0
	13.808	0
	13.8268	0
	13.8456	0
	13.8644	0
	13.8831	0
	13.9019	0
	13.9207	0
	13.9394	0
	13.9582	0
	13.977	0
	13.9957	0
	14.0145	0
	14.0333	0
	14.0521	0
	14.0708	0
	14.0896	0
	14.1084	0
	14.1272	0
	14.1459	0
	14.1647	0
	14.1835	0
	14.2022	0
	14.221	0
	14.2398	0
	14.2586	0
	14.2774	0
	14.2961	0
	14.3149	0
	14.3337	0
	14.3524	0
	14.3712	0
	14.39	0
	14.4087	0
	14.4275	0
	14.4463	0
	14.465	0
	14.4838	0
	14.5026	0
	14.5213	0
	14.5402	0
	14.5611	0
	14.5833	0
	14.6055	0
	14.6278	0
	14.65	0
	14.6722	0
	14.6944	0
	14.7166	0
	14.7388	0
	14.7611	0
	14.7833	0
	14.8055	0
	14.8277	0
	14.8499	0
	14.8721	0
	14.8944	0
	14.9166	0
	14.9388	0
	14.961	0
	14.9832	0
	15.0055	0
	15.0277	0
	15.0499	0
	15.0721	0
	15.0944	0
	15.1166	0
	15.1388	0
	15.161	0
	15.1832	0
	15.2055	0
	15.2277	0
	15.2499	0
	15.2721	0
	15.2944	0
	15.3166	0
	15.3388	0
	15.361	0
	15.3817	0
	15.4018	0
	15.4206	0
	15.4392	0
	15.4579	0
	15.4765	0
	15.4951	0
	15.5138	0
	15.5324	0
	15.551	0
	15.5696	0
	15.5883	0
	15.6068	0
	15.6255	0
	15.6441	0
	15.6626	0
	15.6813	0
	15.6999	0
	15.7185	0
	15.7371	0
	15.7558	0
	15.7744	0
	15.793	0
	15.8116	0
	15.8303	0
	15.8489	0
	15.8675	0
	15.8894	0
	15.9116	0
	15.9338	0
	15.956	0
	15.9783	0
	16.0005	0
	16.0227	0
	16.0449	0
	16.0671	0
	16.0894	0
	16.1116	0
	16.1338	0
	16.156	0
	16.1782	0
	16.2004	0
	16.2227	0
	16.2449	0
	16.2671	0
	16.2893	0
	16.3115	0
	16.3338	0
	16.356	0
	16.3782	0
	16.4004	0
	16.4226	0
	16.4449	0
	16.4671	0
	16.4893	0
	16.5115	0
	16.5337	0
	16.556	0
	16.5782	0
	16.6004	0
	16.6226	0
	16.6448	0
	16.6671	0
	16.6893	0
	16.7115	0
	16.7337	0
	16.7559	0
	16.7782	0
	16.8004	0
	16.8226	0
	16.8448	0
	16.867	0
	16.8892	0
	16.9114	0
	16.9337	0
	16.9559	0
	16.9781	0
	16.9996	0
	17.0219	0
	17.0441	0
	17.0663	0
	17.0885	0
	17.1107	0
	17.1329	0
	17.1552	0
	17.1774	0
	17.1996	0
	17.2218	0
	17.2441	0
	17.2663	0
	17.2885	0
	17.3107	0
	17.3329	0
	17.3551	0
	17.3774	0
	17.3996	0
	17.4218	0
	17.444	0
	17.4663	0
	17.4885	0
	17.5107	0
	17.5329	0
	17.5551	0
	17.5773	0
	17.5996	0
	17.6218	0
	17.644	0
	17.6662	0
	17.6884	0
	17.7107	0
	17.7329	0
	17.7551	0
	17.7773	0
	17.7995	0
	17.8208	0
	17.8431	0
	17.8643	0
	17.8866	0
	17.9088	0
	17.931	0
	17.9533	0
	17.9755	0
	17.9977	0
	18.0199	0
	18.0422	0
	18.0644	0
	18.0866	0
	18.1088	0
	18.1311	0
	18.1533	0
	18.1755	0
	18.1977	0
	18.22	0
	18.2422	0
	18.2644	0
	18.2866	0
	18.3088	0
	18.3311	0
	18.3533	0
	18.3755	0
	18.3978	0
	18.42	0
	18.4422	0
	18.4644	0
	18.4867	0
	18.5089	0
	18.5311	0
	18.5533	0
	18.5755	0
	18.5978	0
	18.62	0
	18.6422	0
	18.6644	0
	18.6867	0
	18.7089	0
	18.7311	0
	18.7533	0
	18.7756	0
	18.7978	0
	18.82	0
	18.8422	0
	18.8645	0
	18.8867	0
	18.9089	0
	18.9311	0
	18.9534	0
	18.9756	0
	18.9978	0
	19.02	0
	19.0423	0
	19.0645	0
	19.0867	0
	19.1082	0
	19.1304	0
	19.1526	0
	19.1748	0
	19.197	0
	19.2193	0
	19.2415	0
	19.2637	0
	19.2859	0
	19.3081	0
	19.3303	0
	19.3526	0
	19.3748	0
	19.397	0
	19.4192	0
	19.4414	0
	19.4636	0
	19.4859	0
	19.5081	0
	19.5303	0
	19.5525	0
	19.5747	0
	19.597	0
	19.6192	0
	19.6414	0
	19.6636	0
	19.6859	0
	19.7081	0
	19.7303	0
	19.7525	0
	19.7748	0
	19.797	0
	19.8192	0
	19.8414	0
	19.8637	0
	19.8859	0
	19.9081	0
	19.9303	0
	19.9526	0
	19.9748	0
	19.997	857.43
	20.0192	0
	20.0415	0
	20.0637	0
	20.0859	0
	20.1065	0
	20.1286	0
	20.1508	0
	20.173	0
	20.1952	0
	20.2175	0
	20.2397	0
	20.2619	0
	20.2841	0
	20.3064	0
	20.3286	0
	20.3508	0
	20.373	0
	20.3953	0
	20.4175	0
	20.4397	0
	20.4619	0
	20.4842	0
	20.5054	0
	20.5276	0
	20.5482	0
	20.5703	0
	20.5925	0
	20.6147	0
	20.6353	0
	20.6573	0
	20.6795	0
	20.7018	0
	20.724	0
	20.7462	0
	20.7684	0
	20.7906	0
	20.8112	0
	20.8333	0
	20.8539	0
	20.8759	0
	20.8981	0
	20.9204	0
	20.9426	0
	20.9648	0
	20.9854	0
	21.0069	0
	21.0274	0
	21.0495	0
	21.0717	0
	21.094	0
	21.1146	0
	21.1364	0
	21.157	0
	21.1791	0
	21.2013	0
	21.2235	0
	21.2457	0
	21.2663	0
	21.2867	0
	21.3071	0
	21.3292	0
	21.3514	0
	21.3719	0
	21.3924	0
	21.4144	0
	21.4367	0
	21.4573	0
	21.4793	0
	21.4999	0
	21.522	0
	21.5426	0
	21.563	0
	21.5834	0
	21.6055	0
	21.6261	0
	21.6465	0
	21.6686	0
	21.6908	0
	21.7114	0
	21.7334	0
	21.7556	0
	21.7779	0
	21.8001	0
	21.8207	0
	21.8427	0
	21.8649	0
	21.8855	0
	21.9059	0
	21.9263	0
	21.9484	0
	21.9689	0
	21.991	0
	22.0132	0
	22.0355	0
	22.0577	0
	22.0782	0
	22.0986	0
	22.1191	0
	22.1395	0
	22.1615	0
	22.1837	0
	22.206	0
	22.2282	0
	22.2488	0
	22.2708	0
	22.2914	0
	22.3118	0
	22.3338	0
	22.3544	0
	22.3761	0
	22.3983	0
	22.4189	0
	22.4393	0
	22.4613	0
	22.4819	0
	22.5023	0
	22.5238	0
	22.546	0
	22.5666	0
	22.587	0
	22.6091	0
	22.6296	0
	22.6517	0
	22.6739	0
	22.6961	0
	22.7167	0
	22.7371	0
	22.7575	0
	22.7796	0
	22.8018	0
	22.8223	0
	22.8427	0
	22.8632	0
	22.8853	0
	22.9058	0
	22.9279	0
	22.9501	0
	22.9724	0
	22.9946	0
	23.0168	0
	23.039	0
	23.0613	0
	23.0835	0
	23.1041	0
	23.1261	0
	23.1484	0
	23.1706	0
	23.1912	0
	23.2116	0
	23.2337	0
	23.2542	0
	23.2747	0
	23.2967	0
	23.3173	0
	23.3394	0
	23.3616	0
	23.3822	0
	23.4042	0
	23.4265	0
	23.4487	0
	23.4709	0
	23.4931	0
	23.5153	0
	23.5375	0
	23.5582	0
	23.5799	0
	23.6021	0
	23.6243	0
	23.6466	0
	23.6688	0
	23.691	0
	23.7133	0
	23.7355	0
	23.7577	0
	23.78	0
	23.8022	0
	23.8228	0
	23.8449	0
	23.8671	0
	23.8893	0
	23.9116	0
	23.9338	0
	23.956	0
	23.9782	0
	24.0005	0
	24.0227	0
	24.0449	0
	24.0672	0
	24.0894	0
	24.1116	0
	24.1322	0
	24.1542	0
	24.1765	0
	24.1971	0
	24.2189	0
	24.2411	0
	24.2633	0
	24.2839	0
	24.3043	0
	24.3264	0
	24.3486	0
	24.3692	0
	24.3912	0
	24.4134	0
	24.4356	0
	24.4562	0
	24.4783	0
	24.5005	0
	24.5227	0
	24.545	0
	24.5672	0
	24.5894	0
	24.61	0
	24.6321	0
	24.6526	0
	24.6747	0
	24.697	0
	24.7192	0
	24.7414	0
	24.762	0
	24.7841	0
	24.8047	0
	24.8268	0
	24.849	0
	24.8696	0
	24.8916	0
	24.9122	0
	24.9343	0
	24.9549	0
	24.977	0
	24.9992	0
	25.0214	0
	25.042	0
	25.0641	0
	25.0863	0
	25.1086	0
	25.1308	0
	25.153	0
	25.1752	0
	25.1975	0
	25.2197	0
	25.2419	0
	25.2641	0
	25.2864	0
	25.3086	0
	25.3308	0
	25.3514	0
	25.3718	0
	25.3939	0
	25.4161	0
	25.4383	0
	25.4606	0
	25.4828	0
	25.5034	0
	25.5238	0
	25.5442	0
	25.5663	0
	25.5885	0
	25.6107	0
	25.6329	0
	25.6535	0
	25.6739	0
	25.696	0
	25.7165	0
	25.7386	0
	25.7608	0
	25.783	0
	25.8036	0
	25.824	0
	25.8444	0
	25.8648	0
	25.8852	0
	25.9071	0
	25.9293	0
	25.9516	0
	25.9738	0
	25.9944	0
	26.0148	0
	26.0352	0
	26.0556	0
	26.076	0
	26.098	0
	26.1203	0
	26.1408	0
	26.1629	0
	26.1835	0
	26.2055	0
	26.2261	0
	26.2465	0
	26.2686	0
	26.2892	0
	26.3096	0
	26.33	0
	26.3518	0
	26.3724	0
	26.3928	0
	26.4132	0
	26.4337	0
	26.4541	0
	26.4745	0
	26.4949	0
	26.5153	0
	26.5357	0
	26.5561	0
	26.5765	0
	26.5969	0
	26.6173	0
	26.6377	0
	26.6581	0
	26.6785	0
	26.6989	0
	26.7193	0
	26.7398	0
	26.7602	0
	26.7806	0
	26.801	0
	26.8214	0
	26.8418	0
	26.8622	0
	26.8826	0
	26.903	0
	26.9234	0
	26.9438	0
	26.9642	0
	26.9846	0
	27.005	0

## Sheet: 1E
Figure 1 Supplementary Figure 1E
PC(15:0/18:1D7)
Group A: Standards
Concentration (µg/ml)	N1	N2	N3
0.1506	674000000	606000000	637000000
0.0753	291000000	314000000	279000000
0.03012	124000000	122000000	121000000
0.01506	69200000	63800000	63900000
0.00753	30400000	32800000	34400000
0.003012	11900000	10700000	12000000
0.001506	4350000	4870000	5450000
0.000753	1580000	1300000	1220000
Group B: Unknown
Concentration (µg/ml)	N1	N2	N3
0.048	190000000	198000000	192000000

## Sheet: 1F
Figure 1 Supplementary Figure 1F
PE(15:0/18:1D7) pos
Group A: Standards
Concentration (µg/ml)	N1	N2	N3
0.0106	20600000	22900000	20800000
0.0053	10800000	10500000	11300000
0.00265	4400000	4870000	3970000
0.00106	1030000	1610000	1700000
0.00053	160000	434000	883000
Group B: Unknown
Concentration (µg/ml)	N1	N2	N3
0.01	17900000	19800000	21000000

## Sheet: 1G
Figure 1 Supplementary Figure 1G
LysoPC(18:1D7)
Group A: Standards
Concentration (µg/ml)	N1	N2	N3
0.0238	81400000	74000000	78100000
0.0119	41800000	37300000	30400000
0.00476	14500000	14400000	13200000
0.00238	8220000	8120000	7720000
0.00119	3290000	3560000	3760000
0.000476	1350000	1120000	1070000
0.000238	485000	547000	590000
Group B: Unknown
Concentration (µg/ml)	N1	N2	N3
0.0075	23600000	23000000	22300000

## Sheet: 1H
Figure 1 Supplementary Figure 1H
LysoPE(18:1D7)
Group A: Standards
Concentration (µg/ml)	N1	N2	N3
0.0049	16300000	15800000	15600000
0.00245	7210000	7290000	7390000
0.00098	2770000	2680000	2800000
0.00049	1400000	1560000	1620000
0.000245	425000	632000	755000
9.8e-05	112000	150000	104000
Group B: Unknown
Concentration (µg/ml)	N1	N2	N3
0.00081	2640000	2570000	1910000
