# Supplementary material for: Metabolomic profiling of rare cell populations isolated by flow cytometry from tissues
Source: eLife. 2021 Jan 20;10:e61980. doi: 10.7554/eLife.61980 (PMC7847306; doi:10.7554/eLife.61980)
Supplement: Figure 1—source data 1. [file elife-61980-fig1-data1.xlsx]

## Sheet: 1A
Number of high confidence metabolite identifications made by spectral database matching whole bone marrow samples using reverse phase or HILIC chromatography.
HighConfidenceIDs_V2
	Reverse Phase	Reverse Phase	Reverse Phase
	Mouse 1	Mouse 2	Mouse 3
Experiment 1	66	78	86
	HILIC	HILIC	HILIC
	Mouse 1	Mouse 2	Mouse 3
Experiment 1	141	130	135
Table Analyzed	1Factor_fully paired_Count_HighConfidenceIDs_V2
Column B	Reverse.Phase
vs.	vs.
Column A	HILIC
Paired t test
P value	0.019
P value summary	*
Significantly different (P < 0.05)?	Yes
One- or two-tailed P value?	Two-tailed
t, df	t=7.144, df=2
Number of pairs	3
How big is the difference?
Mean of differences (B - A)	-58.67
SD of differences	14.22
SEM of differences	8.212
95% confidence interval	-94.00 to -23.33
R squared (partial eta squared)	0.9623
How effective was the pairing?
Correlation coefficient (r)	-0.6373
P value (one tailed)	0.28
P value summary	ns
Was the pairing significantly effective?	No
Normality of Residuals
Test name	Statistics	P value	Passed normality test (alpha=0.05)?	P value summary
Anderson-Darling (A2*)	N too small
D'Agostino-Pearson omnibus (K2)	N too small
Shapiro-Wilk (W)	0.8353	0.2018	Yes	ns
Kolmogorov-Smirnov (distance)	N too small

## Sheet: 1B
Log2 metabolite intensities from sheath fluid blank samples dried in a standard vacuum concentrator, a new vacuum concentrator housed in a clean hood, or not dried.
Standard Vacuum	Vacuum in Clean Hood	No Drying
2.49337	0	0								Standard Vacuum	Vacuum in Clean Hood				Significant?	P value	Adjusted P Value
2.5707	0	0			Table Analyzed	Averaged			Number of values	211	211			Standard vs. Clean	Yes	1e-06	3e-06
2.61068	0	0												Standard vs. No Drying	Yes	1e-06	3e-06
0	0	2.61439			Column A	Standard Vacuum Average			Minimum	0	0			Clean vs. No Drying	Yes	0.0021	0.0021
2.70287	0	0			vs.	vs.			25% Percentile	4.582	0
2.71494	0	0			Column B	Vac_In_Clean_Hood_Average			Median	12.61	5.911
0	0	2.72653							75% Percentile	19.09	19.53
0	2.76477	0			Kolmogorov-Smirnov test				Maximum	30.65	31.19
2.78215	0	0			P value	<0.000001
2.88242	0	0			Exact or approximate P value?	Approximate			Mean	12.5	9.656
2.942	0	0			P value summary	****			Std. Deviation	8.151	9.712
2.9877	0	0			Significantly different (P < 0.05)?	Yes			Std. Error of Mean	0.5611	0.6686
3.04123	0	0			Kolmogorov-Smirnov D	0.2938
3.06817	0	0							Lower 95% CI	11.39	8.338
3.13269	0	0							Upper 95% CI	13.61	10.97
3.13491	0	0
3.14943	0	0
3.20116	0	0								Standard Vacuum	No Drying
0	3.27673	0			Table Analyzed	Averaged			Number of values	211	211
3.36476	0	0
3.36723	0	0			Column A	Standard Vacuum Average			Minimum	0	0
3.43112	0	0			vs.	vs.			25% Percentile	4.582	0
3.60204	0	0			Column C	No_Drying_Average			Median	12.61	0
3.61065	0	0							75% Percentile	19.09	19.79
0	0	3.77273			Kolmogorov-Smirnov test				Maximum	30.65	31.57
3.94078	0	0			P value	<0.000001
3.95008	0	0			Exact or approximate P value?	Approximate			Mean	12.5	7.831
4.01643	0	0			P value summary	****			Std. Deviation	8.151	10.23
0	4.0507	0			Significantly different (P < 0.05)?	Yes			Std. Error of Mean	0.5611	0.7044
4.2686	0	0			Kolmogorov-Smirnov D	0.4645
4.33601	0	0							Lower 95% CI	11.39	6.442
4.51508	0	0							Upper 95% CI	13.61	9.219
4.57529	0	0
4.58159	0	0
4.68596	0	0			Table Analyzed	Averaged				Vacuum in Clean Hood	No Drying
4.92305	0	0							Number of values	211	211
5.16397	0	0			Column B	Vac_In_Clean_Hood_Average
2.81067	0	2.56717			vs.	vs.			Minimum	0	0
0	0	5.56852			Column C	No_Drying_Average			25% Percentile	0	0
5.70044	0	0							Median	5.911	0
0	2.99853	2.8038			Kolmogorov-Smirnov test				75% Percentile	19.53	19.79
3.21487	0	2.64003			P value	0.0021			Maximum	31.19	31.57
5.96008	0	0			Exact or approximate P value?	Approximate
3.45934	2.61238	0			P value summary	**			Mean	9.656	7.831
3.1299	3.33046	0			Significantly different (P < 0.05)?	Yes			Std. Deviation	9.712	10.23
6.57774	0	0			Kolmogorov-Smirnov D	0.1801			Std. Error of Mean	0.6686	0.7044
7.44108	0	0
4.61052	2.83662	0							Lower 95% CI	8.338	6.442
7.55019	0	0							Upper 95% CI	10.97	9.219
7.55609	0	0
8.22446	0	0
8.36814	0	0
8.42335	0	0
3.77393	4.66751	0
4.02664	4.70331	0
8.77107	0	0
8.77977	0	0
8.78209	0	0
3.07231	2.95153	2.87026
8.93535	0	0
3.27942	0	5.86096
6.39063	0	2.8397
2.86748	0	6.40754
9.3874	0	0
9.41937	0	0
2.67438	6.86064	0
9.64929	0	0
7.46449	0	2.65174
10.1337	0	0
10.2109	0	0
10.4999	0	0
10.7649	0	0
11.0294	0	0
11.3498	0	0
5.9749	5.5414	0
9.23225	2.62685	0
11.9213	0	0
9.327	2.59961	0
12.3692	0	0
0	6.30431	6.34253
12.6476	0	0
3.08766	10.0245	0
10.3194	0	2.83817
0	9.13383	4.15591
13.5951	0	0
11.2941	0	2.6246
8.67988	0	5.59878
11.7886	2.64186	0
8.78921	5.85906	0
12.0829	2.73548	0
12.4221	3.38632	0
11.3456	5.0195	0
12.8928	4.13255	0
13.0368	4.00584	0
6.48713	2.8038	8.06892
5.07291	3.27299	9.08598
12.1851	3.00292	2.68507
12.8844	5.58994	0
14.7744	4.23038	0
5.61701	10.7187	2.84276
12.9564	6.27036	0
0	0	19.3868
15.3794	4.12905	0
8.82565	5.42559	5.8216
12.7317	7.41919	0
12.8588	8.77997	0
2.61739	11.0239	8.26327
14.1657	7.86355	0
14.4075	7.78302	0
12.6095	9.62374	0
14.3271	2.55917	5.35672
13.0219	9.33653	0
14.9369	8.32413	0
14.6765	9.39296	0
5.18811	0	20.0546
11.3605	2.75465	11.1781
0	0	25.3157
20.0103	3.21943	2.97742
14.5951	11.924	0
13.3892	10.3927	2.97837
12.7411	14.0259	0
12.7317	11.0212	3.09975
0	3.73601	23.2935
14.6328	13.14	0
13.9844	14.7498	0
16.0051	12.7995	0
17.0204	12.1379	0
16.1039	13.5342	0
15.2967	12.0791	2.81404
19.0935	5.91107	5.42284
15.7008	12.0514	2.88374
17.3119	14.8801	0
17.2619	15.3586	0
15.9896	13.6778	4.08133
14.6856	19.5254	0
14.6641	16.1261	3.59089
17.0139	17.5151	0
16.0803	18.5605	0
17.6215	17.2381	0
12.7479	20.2327	3.23661
19.1231	17.1931	0
21.5526	15.3667	0
19.7381	17.6123	0
12.2252	9.9695	17.044
20.4872	15.5266	3.37931
18.9025	20.563	0
15.8508	20.8114	3.80149
8.43751	13.0106	20.0966
20.5964	20.5966	3.73601
25.3816	0	20.6035
16.9479	15.6967	15.048
16.9479	15.6967	15.0571
14.1957	12.3891	21.2559
25.3369	22.506	0
15.017	12.7681	20.3925
11.1357	18.3454	18.8318
8.03377	19.8559	21.8718
15.9822	17.9258	17.2319
14.1207	14.0337	23.37
20.4983	17.9842	15.8682
21.6489	15.3953	18.6652
13.2284	21.0353	21.83
13.2153	21.4855	22.1824
16.0033	19.5184	21.5805
16.2635	20.7192	20.5338
16.285	20.4995	21.5319
21.8607	19.5652	17.3824
16.6065	20.7855	21.8433
21.6317	19.4002	18.5026
18.3614	11.9237	29.2602
20.7353	19.5751	19.4042
21.3296	19.8291	19.0665
20.4166	19.2772	20.748
20.802	20.1171	19.7913
23.0574	21.9671	18.1863
20.9766	21.939	20.7412
20.1685	22.4835	21.1038
18.3069	23.2348	22.518
19.948	22.7929	21.4476
22.1062	21.6225	20.9481
21.9504	22.1167	21.2568
23.4595	21.6615	20.7663
24.2697	22.9466	18.7317
22.6081	22.2123	21.6248
24.5132	21.1761	20.9083
23.4832	23.0184	21.6249
23.1573	23.5867	22.0925
23.3375	23.9179	22.3722
23.7014	23.3734	22.5918
23.5699	23.546	23.1473
23.6555	23.7292	23.1984
23.8285	23.2843	24.2205
23.2607	24.0473	24.3614
24.2097	23.7045	24.4571
24.5525	24.5338	23.7282
25.972	23.5863	23.6915
24.2413	24.4683	24.6733
24.0651	24.2712	25.0635
25.2237	25.5841	23.8049
27.068	25.2525	24.2856
25.6563	26.072	25.1044
26.3912	25.3929	25.5921
24.6128	24.7754	28.9513
26.354	26.0885	26.4717
27.2032	27.0578	25.1222
29.7307	28.9292	24.1611
27.7477	28.0891	27.0909
29.5939	28.6879	27.5458
29.7075	30.4614	30.9377
29.7075	30.4861	30.9377
30.6485	31.1902	31.5697

## Sheet: 1C
Number of metabolites detected above background from whole bone marrow cells after drying extracts in a standard vacuum concentrator, drying in a new vacuum housed in a clean hood, or samples that were not dried.
	Standard Vacuum
	Mice 1-5
Experiment 1	98
	Vacuum in Clean Hood
	Mice 1-5
Experiment 1	123
	No Drying
	Mice 1-5
Experiment 1	130

## Sheet: 1D
Number of metabolites detected from 100,000 WBM cells extracted in 80% methanol (MeOH), 80% acetonitrile (ACN), or a mix of 40% MeOH, 40% ACN, 20% H2O (MIX)
	MeOH	MeOH	MeOH
	Mouse 1	Mouse 2	Mouse 3
Experiment 1	268	269	260
	ACN	ACN	ACN
	Mouse 1	Mouse 2	Mouse 3
Experiment 1	316	313	323
	MIX	MIX	MIX
	Mouse 1	Mouse 2	Mouse 3
Experiment 1	272	281	265
Table Analyzed	1Factor_fully paired_Count_ACN_MEOH_MIX_Observed_0623-0624_2020_V1								Number of families	1
									Number of comparisons per family	3
Repeated measures ANOVA summary									Alpha	0.05
Assume sphericity?	No
F	48.99								Tukey's multiple comparisons test	Mean Diff.	95.00% CI of diff.	Significant?	Summary	Adjusted P Value
P value	0.0152								ACN. vs. MeOH	51.67	17.60 to 85.73	Yes	*	0.0224	A-B
P value summary	*								ACN. vs. MIX	44.67	0.4097 to 88.92	Yes	*	0.0491	A-C
Statistically significant (P < 0.05)?	Yes								MeOH vs. MIX	-7	-21.82 to 7.825	No	ns	0.1908	B-C
Geisser-Greenhouse's epsilon	0.5508
R squared	0.9608								Test details	Mean 1	Mean 2	Mean Diff.	SE of diff.	n1	n2	q	DF
									ACN. vs. MeOH	317.3	265.7	51.67	5.783	3	3	12.63	2
Was the matching effective?									ACN. vs. MIX	317.3	272.7	44.67	7.513	3	3	8.408	2
F	0.3903								MeOH vs. MIX	265.7	272.7	-7	2.517	3	3	3.934	2
P value	0.7001
P value summary	ns
Is there significant matching (P < 0.05)?	No
R squared	0.007597
ANOVA table	SS	DF	MS	F (DFn, DFd)	P value
Treatment (between columns)	4714	2	2357	F (1.102, 2.203) = 48.99	P=0.0152
Individual (between rows)	37.56	2	18.78	F (2, 4) = 0.3903	P=0.7001
Residual (random)	192.4	4	48.11
Total	4944	8
Model comparison	SS	DF	Probability it is correct
Null H. All population means identical	4906	6	96.85%
Alternative H: Distinct population means	192.4	4	3.15%
Ratio of probabilities			30.79
Difference in AICc			-6.854
Data summary
Number of treatments (columns)	3
Number of subjects (rows)	3
Number of missing values	0

## Sheet: 1E
Metabolites detected in 100,000 WBM cells extracted in 80% acetonitile (ACN), 80% methanol (MeOH), or 40% ACN, 40% MeOH, 20% H2O. Data are from 1 replicate, representative of 3 replicates.
ACN	MeOH	Mix
?-Aminobutyric acid (GABA)	?-Aminobutyric acid (GABA)	(2R)-3-Sulfolactate
(1E)-1-(Propylsulfanyl)-1-propene	(2R)-3-Sulfolactate	(R_R)-Tartaricacid
(2R)-3-Sulfolactate	(R_R)-Tartaricacid	(R)-4-Dehydropantoate
(R_R)-Tartaricacid	(R)-4-Dehydropantoate	(R)-Lactate
(R)-2_3-Dihydroxy-3-methylpentanoate	(R)-Lactate	(R)-Pantolactone
(R)-4-Dehydropantoate	(R)-Pantolactone	(S)-2-Acetolactate/ Methylsuccinate
(R)-Lactate	(R)(-)-Allantoin	1-Methylnicotinamide
(R)-Pantolactone	(S)-2-Acetolactate/ Methylsuccinate	2_5-Dihydroxybenzaldehyde
(R)(-)-Allantoin	1-Aminocyclopropane-1-carboxylate	2-(alpha-D-Mannosyl)-3-phosphoglycerate
(S)-2-Acetolactate/ Methylsuccinate	1-Methylnicotinamide	2-demethylmenaquinol-9
(S)-2-Amino-3-(3-hydroxy-4-oxo-4H-pyridin-1-yl)propanoate	2_4-Dihydroxybenzoicacid	2-Hydroxy-2_4-pentadienoate/ Ethyl glucuronide
(S)-Methylmalonatesemialdehyde	2_5-Dihydroxybenzaldehyde	2-Hydroxy-3-oxopropanoate
1-Aminocyclopropane-1-carboxylate	2-(alpha-D-Mannosyl)-3-phosphoglycerate	2-hydroxyglutarate
1-Methylhistidine	2-demethylmenaquinol-9	2-Methylcholine
1-Methylnicotinamide	2-Hydroxy-2_4-pentadienoate/ Ethyl glucuronide	3-Carboxy-1-methylpyridinium;N-Methylnicotinicacid
2_2'-Iminodipropanoate	2-Hydroxy-3-oxopropanoate	3-Dehydroxycarnitine
2_4-Dihydroxybenzoicacid	2-hydroxyglutarate	3-Hydroxy-2-methylpyridine-4_5-dicarboxylate
2_5_6-Trihydroxy-5_6-dihydroquinoline	2-Methylcholine	3-Hydroxy-3-methylglutaric acid
2_5-Dihydroxybenzaldehyde	3-Carboxy-1-methylpyridinium;N-Methylnicotinicacid	3-hydroxybutyrylcarnitine
2-(alpha-D-Galactosyl)-sn-glycerol3-phosphate	3-Dehydroxycarnitine	3-Pyridylacetic acid
2-(alpha-D-Mannosyl)-3-phosphoglycerate	3-Hydroxy-2-methylpyridine-4_5-dicarboxylate	3'-UMP
2-(Hydroxymethyl)-1-methyl-3,4,5-piperidinetriol	3-Hydroxy-3-methylglutaric acid	4-Amino-2-methyl-5-phosphomethylpyrimidine
2-Amino-4-sulfinobutanoic acid (homocysteine sufinic acid)	3-hydroxybutyrylcarnitine	4-Coumarylalcohol
2-Aminoacetophenone;O-Acetylaniline	3-Pyridylacetic acid	4-Guanidinobutanal
2-demethylmenaquinol-9	3'-UMP	4-Guanidinobutyric acid
2-Hydroxy-2_4-pentadienoate/ Ethyl glucuronide	4-Amino-2-methyl-5-phosphomethylpyrimidine	4-Methylene-L-glutamate
2-Hydroxy-3-oxopropanoate	4-Coumarylalcohol	4-Methylene-L-glutamine
2-Hydroxy2-methylbutyricacid	4-Guanidinobutanal	4-Oxoproline
2-hydroxyglutarate	4-Guanidinobutyric acid	9_12-Dioxododecanoicacid
2-Methylcholine	4-Methylene-L-glutamate	9-Aminononanoic acid
2-Methylhippuricacid	4-Methylene-L-glutamine	Acetyl beta methylcholine
2,3-Bis(octanoyloxy)propanimidic acid	4-Oxoproline	Acetyl-L-carnitine
2'_3'-CyclicCMP	9_12-Dioxododecanoicacid	Acetylcholine
2/4-Hydroxybutyric acid	9-Aminononanoic acid	Adenosine
3-Carboxy-1-methylpyridinium;N-Methylnicotinicacid	Acetyl beta methylcholine	Adenosine diphosphate (ADP)
3-Dehydroxycarnitine	Acetyl-L-carnitine	Adenosine monophosphate
3-Hydroxy-2-methylpyridine-4_5-dicarboxylate	Acetylcholine	Adenosine triphosphate (ATP)
3-Hydroxy-3-methylglutaric acid	Adenosine	Alanine
3-Hydroxybutyric acid	Adenosine diphosphate (ADP)	Aminoacrylate
3-hydroxybutyrylcarnitine	Adenosine monophosphate	Aminohydroxyoctanoic acid
3-Pyridylacetic acid	Adenosine triphosphate (ATP)	Aminopentanal
3'-UMP	Alanine	Anserine
3alpha_7alpha_12beta-Trihydroxy-5beta-cholanate	Aminoacrylate	Asparagine
4-Amino-2-methyl-5-phosphomethylpyrimidine	Aminohydroxyoctanoic acid	Carnitine (12:0)
4-Coumarylalcohol	Aminopentanal	Carnitine (14:0)
4-Guanidinobutanal	Anserine	Carnitine (16:0)
4-Guanidinobutyric acid	Asparagine	Carnitine (16:1)
4-Methylene-L-glutamate	Carnitine (12:0)	Carnitine (18:1)
4-Methylene-L-glutamine	Carnitine (14:0)	Carnitine (4:0)
4-Oxoproline	Carnitine (16:0)	Carnitine (methylbutyryl)
5-Aminovaleric acid/ Valine	Carnitine (16:1)	Carnosine
7-Methylxanthine	Carnitine (18:1)	Choline
9_12-Dioxododecanoicacid	Carnitine (18:2)	Cholinephosphate
9-Aminononanoic acid	Carnitine (3-hydroxy-6:0)	Citric acid/Isocitric Acid
a-Ketoglutarate	Carnitine (3-hydroxy-C16:0)	Creatine
Acetyl beta methylcholine	Carnitine (4:0)	CyclicADP-ribose
Acetyl-hexosamine-phosphate	Carnitine (C14:1)	Cyclohexylamine
Acetyl-hexosamine-sulfate-1	Carnitine (methylbutyryl)	Cysteine sulfinic acid
Acetyl-L-carnitine	Carnosine	Cysteinylglycine(Cys-Gly)
Acetylcholine	Catechol;1_2-Dihydroxybenzene	Cytidine monophosphate
Adenosine	Choline	D-(-)-Glutamine
Adenosine diphosphate (ADP)	Cholinephosphate	D-(+)-Glucose
Adenosine monophosphate	Citric acid/Isocitric Acid	D-(+)-Malic acid
Adenosine triphosphate (ATP)	Creatine	D-(+)-Proline
Adenosinediphosphateribose;ADP-Ribose	CyclicADP-ribose	D-Saccharicacid
Alanine	Cyclohexylamine	demethylmenaquinone-8
Alanylleucine-1	Cysteine sulfinic acid	Dihydroxyacetone phosphate
Aminoacrylate	Cysteinylglycine(Cys-Gly)	Dimethylarginine
Aminohydroxyoctanoic acid	Cytidine monophosphate	DL-Arginine
Aminolevulinic Acid/ Hydroxyproline	D-(-)-Glutamine	DL-Carnitine
Aminonicotinic Acid	D-(+)-Glucose	DL-Lysine
Aminopentanal	D-(+)-Malic acid	DL-Stachydrine
Aminopyridine (2)	D-(+)-Proline	Erucamide
Anserine	D-Saccharicacid	Glyceraldehyde 3-phosphate
arg-ala	demethylmenaquinone-8	Glycerol 3-phosphate
Asparagine	Dihydroxyacetone phosphate	Guanidineaceticacid;Guanidoaceticacid
Beta-Alanine	Dimethylarginine	heptaminol
Betaine	DL-Arginine	Hercynine-2
Carnitine (12:0)	DL-Carnitine	Hexose-phosphate-1
Carnitine (12:1)	DL-Lysine	Hexoses
Carnitine (14:0)	DL-Stachydrine	hydrocortamate
Carnitine (16:0)	Erucamide	Hydroxyoctanoic acid (C8, -OH)
Carnitine (16:1)	FA (16:0)	Hypotaurine
Carnitine (18:1)	FA (16:1)	Hypoxanthine
Carnitine (18:2)	Geranylacetate	Indole-3-acrylic acid
Carnitine (3-hydroxy-14:0)	Glyceraldehyde 3-phosphate	Inosine
Carnitine (3-hydroxy-6:0)	Glycerol 3-phosphate	Inosine-5'-monophosphate (IMP)
Carnitine (3-hydroxy-8:0)	Guanidineaceticacid;Guanidoaceticacid	Isoleucine
Carnitine (3-hydroxy-C14:1)	heptaminol	L-2-Amino-3-oxobutanoicacid
Carnitine (3-hydroxy-C16:0)	Hercynine-2	L-Aspartic acid
Carnitine (3-hydroxy-C16:2)	Hexose-phosphate-1	L-Glutamic acid
Carnitine (4:0)	Hexoses	L-Glutathione (reduced)
Carnitine (C14:1)	hydrocortamate	L-Glutathione oxidized
Carnitine (methylbutyryl)	Hydroxyoctanoic acid (C8, -OH)	L-Histidine
Carnosine	Hypotaurine	L-Threonicacid
Catechol;1_2-Dihydroxybenzene	Hypoxanthine	L-Tyrosine
CDP-ethanolamine	Indole-3-acrylic acid	Lyso-PC (16:0)
Ceramide Phosphate (d18:1/16:0)	Inosine	Lyso-PC (18:1)
Choline	Inosine-5'-monophosphate (IMP)	Lysylvaline (1)
Cholinephosphate	Isoleucine	menaquinol-8
Citric acid/Isocitric Acid	L-2-Amino-3-oxobutanoicacid	Methyl-D-erythritol-4-phosphate
CMP-N-acetylneuraminate	L-Aspartic acid	N-(6-Aminohexanoyl)-6-aminohexanoate
Creatine	L-Glutamic acid	N-Acetyl-DL-glutamic acid
CyclicADP-ribose	L-Glutathione (reduced)	N-Acetylaspartic acid
Cyclohexylamine	L-Glutathione oxidized	n-Butyl lactate
Cysteine sulfinic acid	L-Histidine	N-Ribosylnicotinamide
Cysteinylglycine(Cys-Gly)	L-Phenylalanine	N-Undecanoylglycine
Cytidine 5'-diphosphocholine	L-Threonicacid	N1-(1,3,5-Trimethyl-1H-pyrazol-4-yl)-2-cyano-3-(dimethylamino)acrylamide
Cytidine monophosphate	L-Tyrosine	N2-Acetyl-L-aminoadipate
Cytosine	Lyso-PC (16:0)	N6,N6,N6-Trimethyl-L-lysine
D-(-)-Glutamine	Lyso-PC (18:1)	NAD+
D-(+)-Glucose	Lyso-PC (18:2)	Nicotinamide
D-(+)-Malic acid	Lyso-PE (18:0)	O-Feruloylquinate
D-(+)-Proline	Lysylvaline (1)	O-Phosphorylethanolamine
D-Iditol	menaquinol-8	Octopamine
D-Saccharicacid	Methyl-D-erythritol-4-phosphate	Oleamide
demethylmenaquinone-8	N-(6-Aminohexanoyl)-6-aminohexanoate	Oxalic Acid
Dihydrothymine	N-Acetyl-DL-glutamic acid	Oxododecanoic Acid (C10:0, C=O)
Dihydroxyacetone phosphate	N-Acetylaspartic acid	P-DMEA
Dimethylarginine	n-Butyl lactate	PC (16:0/16:0)/ PC (18:0/14:0)
Dimethyllysine	N-Ribosylnicotinamide	PC (16:0/16:1)
DL-Arginine	N-Undecanoylglycine	PC (16:0/18:1)
DL-Carnitine	N1-(1,3,5-Trimethyl-1H-pyrazol-4-yl)-2-cyano-3-(dimethylamino)acrylamide	PC (16:0/18:2)
DL-Lysine	N2-Acetyl-L-aminoadipate	PC (16:0/22:5)
DL-Stachydrine	N6,N6,N6-Trimethyl-L-lysine	PC (18:0/18:1)
Erucamide	NAD+	PC (18:0/20:4)
FA (16:0)	Nicotinamide	PC (18:1/18:1)
FA (16:1)	O-Feruloylquinate	PE (16:0/16:0)
Fumaric acid	O-Phosphorylethanolamine	PE (16:0/18:1)
Galacturonic acid	Octopamine	PE (16:0/20:3)
gamma-glutamyltyramine	Oleamide	PE (18:0/18:2)
Geranylacetate	Oxalic Acid	PE (18:0/20:4)
Glyceraldehyde 3-phosphate	Oxododecanoic Acid (C10:0, C=O)	PE (18:1/18:1)
Glycerol 3-phosphate	P-DMEA	PE (18:1/20:4)
Glycerophosphoglycerol	PC (16:0/16:0)/ PC (18:0/14:0)	PE (18:1/22:6)
Glycylproline	PC (16:0/16:1)	Pentose-phosphate-1
Guanidineaceticacid;Guanidoaceticacid	PC (16:0/18:1)	Phosphoenolpyruvic acid
Guanidinoethyl sulfonate	PC (16:0/18:2)	Phosphoglyceric acid
Guanosine monophosphate (GMP)	PC (16:0/22:5)	Platelet-activating factor
heptaminol	PC (18:0/18:1)	Prolylleucine
Hercynine-2	PC (18:0/20:4)	Propionylcarnitine
Hexanoylglycine/ N-Acetyl-L-leucine	PC (18:1/18:1)	PS (18:0/18:1)
Hexose Acid	PE (16:0/16:0)	PS (18:0/20:3)
Hexose-phosphate-1	PE (16:0/18:1)	PS (18:0/20:4)
Hexose-phosphate-2	PE (16:0/20:3)	PS (18:0/22:6)
Hexoses	PE (18:0/18:2)	Pseudouridine
Hippuric acid	PE (18:0/20:4)	Pyroglutamic acid
Homoarginine	PE (18:1/18:1)	S-Acetyldihydrolipoamide
hydrocortamate	PE (18:1/20:4)	S-Methyl-thioadenosine
hydroxycitric acid	PE (18:1/22:6)	Serine
Hydroxyoctanoic acid (C8, -OH)	Pentose-phosphate-1	SM (d18:1/16:1)
Hypotaurine	Phosphoenolpyruvic acid	SM (d18:1/18:0)
Hypoxanthine	Phosphoglyceric acid	sn-glycero-3-Phosphocholine
Indole-3-acrylic acid	Platelet-activating factor	sn-glycero-3-Phosphoethanolamine
Inosine	Prolylleucine	Sphingosine
Inosine-5'-monophosphate (IMP)	Propionylcarnitine	Stearic acid (C18:0)
Isoleucine	PS (18:0/18:1)	Taurine
L-2-Amino-3-oxobutanoicacid	PS (18:0/20:3)	Tetradecylamine
L-Ascorbic acid 2-sulfate	PS (18:0/20:4)	Threonine
L-Aspartic acid	PS (18:0/22:6)	trans-Aconitic acid
L-Carnitinamide	Pseudouridine	UDP-Hexose
L-Glutamic acid	Pyroglutamic acid	UDP-N-acetyl-D-hexosamine
L-Glutathione (reduced)	S-Acetyldihydrolipoamide	Uracil;2_4-Dihydroxypyrimidine
L-Glutathione oxidized	S-Methyl-thioadenosine	Uric acid
L-Histidine	Serine	Uridine5'-diphosphate(UDP)
L-Homocysteicacid	SM (d18:1/16:1)	Valine
L-Phenylalanine	SM (d18:1/18:0)	Valylvaline
L-Threonicacid	sn-glycero-3-Phosphocholine	Xanthine
L-Tyrosine	sn-glycero-3-Phosphoethanolamine	FA (14:0)
L(+)-Citrulline;2-Amino-5-uredovalerate	Sphingosine	Hexoseamine
Leucine	Stearic acid (C18:0)	PE (16:0/20:6)
Leucylproline	Taurine	PE (18:0/18:1)
Lyso-Ether-PE (C18:0)	Tetradecylamine	PE (18:0/22:5)
Lyso-PA (16:0)	Threonine	PS (18:1/22:6)
Lyso-PC (16:0)	trans-Aconitic acid	SM (d18:1/22:0)
Lyso-PC (18:0)	UDP-Hexose	Sphinganine
Lyso-PC (18:1)	UDP-N-acetyl-D-hexosamine	3-Demethylubiquinone-9
Lyso-PC (18:2)	Uracil;2_4-Dihydroxypyrimidine	PC (18:3/18:2)
Lyso-PC (22:4)	Uric acid	PE (16:0/18:2)
Lyso-PE (16:0)	Uridine5'-diphosphate(UDP)	PE (16:0/22:6)
Lyso-PE (18:0)	Valine	PE (17:0/20:4)
Lyso-PE (18:1)	Valylproline	PE (18:0/20:3)
Lyso-PE (18:2)	Valylvaline	PE (18:0/22:6)
Lyso-PE (20:4)	Xanthine	PS (16:0/22:6)
Lysylvaline (1)	Carnitine (18:0)	PS (18:1/20:4)
menaquinol-8	FA (14:0)	PS (18:2/18:2)
Methyl-D-erythritol-4-phosphate	Hexoseamine	(2xi)-D-gluco-heptonic acid
N-(6-Aminohexanoyl)-6-aminohexanoate	Nipecotic acid	2-Tritriacontyl-5-hydroxy-7-methoxychromone
N-Acetyl-1-aspartylglutamic acid	PE (16:0/20:6)	Carnitine (6:1)
N-Acetyl-D-galactosamine 4-sulfate	PE (18:0/18:1)	Citraconic acid
N-Acetyl-DL-glutamic acid	PE (18:0/22:5)	Cytidine
N-Acetylaspartic acid	PS (18:1/22:6)	Desaminotyrosine
N-Acetylneuraminic acid	SM (d18:1/22:0)	L-(+)-Tartaricacid;Diethyltartrate
n-Butyl lactate	Sphinganine	PC (16:0/20:4)
N-Ribosylnicotinamide	3-Demethylubiquinone-9	PE (18:2/18:1)/ PE (18:1/18:2)
N-Undecanoylglycine	3-Methylsulfolene	PI (16:0/16:0)
N1-(1,3,5-Trimethyl-1H-pyrazol-4-yl)-2-cyano-3-(dimethylamino)acrylamide	PC (16:1/16:1)	PS (18:0/22:5)
N2-Acetyl-L-aminoadipate	PC (18:3/18:2)	Sebacicacid
N3-Oxalyl-L-2_3-diaminopropanoate	PE (16:0/18:2)	SM (d18:1/22:3)
N6,N6,N6-Trimethyl-L-lysine	PE (16:0/22:6)	Thymine
NAD+	PE (17:0/20:4)	(S)-Methylmalonatesemialdehyde
Neuraminicacid	PE (18:0/20:3)	2_2'-Iminodipropanoate
Nicotinamide	PE (18:0/22:6)	2-Methylhippuricacid
O-Feruloylquinate	PS (16:0/22:6)	Adenosinediphosphateribose;ADP-Ribose
O-Phosphorylethanolamine	PS (18:1/20:4)	Carnitine (3-hydroxy-8:0)
Octadecanamine	PS (18:2/18:2)	Ceramide Phosphate (d18:1/16:0)
Octopamine	(2xi)-D-gluco-heptonic acid	Cytidine 5'-diphosphocholine
Oleamide	11-Aminoundecanoic acid	Galacturonic acid
Oleic acid	2-Tritriacontyl-5-hydroxy-7-methoxychromone	Hippuric acid
Ornithine	2,5-Furandicarboxylic acid	Lyso-PC (18:0)
Orotic acid	3-decaprenyl-4,5-dihydroxybenzoic acid	N-Acetyl-D-galactosamine 4-sulfate
Oxalic Acid	Carnitine (6:0)	Pentose acid
Oxododecanoic Acid (C10:0, C=O)	Carnitine (6:1)	Pentose-1
Oxotetradecanoic acid (C14:0, C=O)	Citraconic acid	S-Adenosylmethionine
P-DMEA	Cytidine	Pregnanetriol
Pantothenic acid	Desaminotyrosine	CDP-ethanolamine
PC (16:0/16:0)/ PC (18:0/14:0)	L-(+)-Tartaricacid;Diethyltartrate	Dimethyllysine
PC (16:0/16:1)	PC (16:0/18:4)	L(+)-Citrulline;2-Amino-5-uredovalerate
PC (16:0/18:1)	PC (16:0/20:4)	Succinic acid
PC (16:0/18:2)	PC (18:0/22:4)	1-Methylhistidine
PC (16:0/22:5)	PC (18:0/22:5)	Acetyl-hexosamine-sulfate-1
PC (18:0/18:1)	PC (18:1/20:5)	Beta-Alanine
PC (18:0/20:4)	PC (20:4/20:4)	Cytosine
PC (18:1/18:1)	PE (18:2/18:1)/ PE (18:1/18:2)	D-Iditol
PE (16:0/16:0)	PI (16:0/16:0)	Phosphonoacetaldehyde
PE (16:0/18:1)	PS (18:0/22:5)	DL-Tryptophan
PE (16:0/20:3)	Sebacicacid	PA (16:0/18:1)
PE (18:0/18:2)	SM (d18:1/22:3)	3'-hydroxyacetophenone;3-ACETYLPHENOL
PE (18:0/20:4)	Thymine	Aminomethylpropanoate
PE (18:1/18:1)	(S)-Methylmalonatesemialdehyde	Dezaguanine
PE (18:1/20:4)	2_2'-Iminodipropanoate	Methylimidazoleacetic acid
PE (18:1/22:6)	2-Methylhippuricacid	Pipecolic acid
Pentose acid	7-Methylxanthine	?-Aminobutyric acid (GABA)
Pentose-1	Adenosinediphosphateribose;ADP-Ribose	(R)(-)-Allantoin
Pentose-2	Carnitine (3-hydroxy-8:0)	1-Aminocyclopropane-1-carboxylate
Pentose-phosphate-1	Ceramide Phosphate (d18:1/16:0)	Carnitine (3-hydroxy-6:0)
Phosphoenolpyruvic acid	Cytidine 5'-diphosphocholine	FA (16:0)
Phosphoglyceric acid	Galacturonic acid	Geranylacetate
Phosphonoacetaldehyde	Hexanoylglycine/ N-Acetyl-L-leucine	L-Phenylalanine
Platelet-activating factor	Hippuric acid	Lyso-PC (18:2)
Prolylleucine	hydroxycitric acid	Lyso-PE (18:0)
Propionylcarnitine	Lyso-PC (18:0)	Valylproline
PS (18:0/18:1)	N-Acetyl-1-aspartylglutamic acid	Carnitine (18:0)
PS (18:0/20:3)	N-Acetyl-D-galactosamine 4-sulfate	3-Methylsulfolene
PS (18:0/20:4)	Oxotetradecanoic acid (C14:0, C=O)	PC (16:1/16:1)
PS (18:0/22:6)	Pentose acid	Carnitine (6:0)
Pseudouridine	Pentose-1	7-Methylxanthine
Pyroglutamic acid	Pentose-2	Hexanoylglycine/ N-Acetyl-L-leucine
Pyruvate	S-Adenosylmethionine	hydroxycitric acid
S-Acetyldihydrolipoamide	2-Deoxy-D-glucose6-phosphate	N-Acetyl-1-aspartylglutamic acid
S-Adenosylhomocysteine	FA (14:1)	Oxotetradecanoic acid (C14:0, C=O)
S-Adenosylmethionine	Guanine	Pentose-2
S-Methyl-thioadenosine	Pregnanetriol	FA (14:1)
Serine	Urocanic acid	Urocanic acid
SM (d18:1/16:1)	Thymidine	Thymidine
SM (d18:1/18:0)	4a-Carbinolaminetetrahydrobiopterin	4a-Carbinolaminetetrahydrobiopterin
sn-glycero-3-Phosphocholine	Carnitine (8:0)	PS (16:1/18:1)
sn-glycero-3-Phosphoethanolamine	Hypotaurocyamine	gamma-glutamyltyramine
Sphingosine	PC (18:0/22:6)	L-Homocysteicacid
Stearic acid (C18:0)	PE (18:2/18:3)	Lyso-PE (16:0)
Succinic acid	PG (C18:1/C18:1)	Carnitine (10:0)
Taurine	PS (16:1/18:1)	2-(alpha-D-Galactosyl)-sn-glycerol3-phosphate
Tetradecylamine	5-Aminovaleric acid/ Valine	2-Amino-4-sulfinobutanoic acid (homocysteine sufinic acid)
Threonine	Carnitine (3-hydroxy-14:0)	Hexose Acid
trans-Aconitic acid	Carnitine (3-hydroxy-C14:1)	?-L-Glutamyl-L-glutamic acid
UDP-Hexose	CDP-ethanolamine	2-Aminooctanedioic acid
UDP-N-acetyl-D-hexosamine	Dimethyllysine	2-Formylglutarate
Uracil;2_4-Dihydroxypyrimidine	gamma-glutamyltyramine	4-Hydroxyindole
Uric acid	Guanidinoethyl sulfonate	ARG-PHE
Uridine5'-diphosphate(UDP)	Homoarginine	FA (12:0)
Valine	L-Homocysteicacid	N-Butyryl-L-homoserinelactone
Valylproline	L(+)-Citrulline;2-Amino-5-uredovalerate	2_4-Dihydroxybenzoicacid
Valylvaline	Lyso-PE (16:0)	Carnitine (18:2)
Xanthine	Octadecanamine	PC (18:0/22:4)
?-L-Glutamyl-L-glutamic acid	Ornithine	PC (18:0/22:5)
1,5-Anhydro-D-glucitol	Pantothenic acid	PC (20:4/20:4)
2-Acetamido-1,5-anhydro-2-deoxy-3-O-beta-D-galactopyranosyl-D-arabino-hex-1-enitol	Succinic acid	2-Deoxy-D-glucose6-phosphate
2-Aminooctanedioic acid	1,5-Anhydro-D-glucitol	Guanine
2-Deoxy-D-glucose6-phosphate	Deoxypentose-5-phosphate-2	Hypotaurocyamine
3-Indolepropionicacid	N-Glycolylneuraminic acid	Carnitine (3-hydroxy-C14:1)
3-Oxalomalate	Nicotinamide adenine dinucleotide phosphate (NADP+)	Pantothenic acid
Acylglycine (C8:0)	Pentose-phosphate-2	1,5-Anhydro-D-glucitol
ADP-D-ribose 1'',2''-cyclic phosphate	1-(5-Azido-5-deoxy-beta-D-ribofuranosyl)-4-hydroxy-2(1H)-pyrimidinone	Nicotinamide adenine dinucleotide phosphate (NADP+)
Aminopyridine (1)	4-Imidazolone-5-propanoate	Arg-pro
Aminopyridine (3)	Carnitine (3-hydroxy-C14:2)	Carnitine (10:1)
Argininosuccinic acid	Hydantoin-5-propionate	Hercynine-1
Carnitine (14:2)	(2E_6E)-(10R_11S)-10_11-Epoxy-3_7_11-trimethyltrideca-2_6-dienoicacid	3-Hydroxybutyric acid
Carnitine (18:0)	(E)-Glutaconate	a-Ketoglutarate
D-Methionine	1-Amino-1-deoxy-scyllo-inositol	Carnitine (12:1)
D-Sedoheptulose 7-phosphate	2'-O-Methylinosine	CMP-N-acetylneuraminate
Deoxypentose-5-phosphate-2	3-Hydroxy-2-methyl-4-pyrone	Lyso-Ether-PE (C18:0)
DL-Tryptophan	Acetonecyanohydrin	3-Indolepropionicacid
FA (14:0)	AminoDHQ	Carnitine (14:2)
FA (14:1)	Arg-pro	D-Methionine
GDP-3_6-dideoxy-D-galactose	asn-pro	GDP-3_6-dideoxy-D-galactose
Guanine	Carnitine (10:0)	N-Acetyl-L-phenylalanine
Hexoseamine	Carnitine (10:1)	N-Acetylornithine
L-N2-(2-Carboxyethyl)arginine	Carnitine (tiglyl)	Nicotinuricacid
N-Acetyl-L-phenylalanine	epsilon-(gamma-Glutamyl)-lysine	Phosphocreatine
N-Acetylornithine	FA (20:0)	2-amino-2,3,7-trideoxy-D-lyxo-hept-6-ulosonic acid
N-Glycolylneuraminic acid	Hemin	Dihydrooroticacid
Nicotinamide adenine dinucleotide phosphate (NADP+)	Hercynine-1	2-(Hydroxymethyl)-3-(acetamidomethylene)succinate
Nicotinuricacid	Histamine	2-Amino-4-hydroxy-6-hydroxymethyl-7_8-dihydropteridine
Nipecotic acid	Isoleucylasparagine	2-Aminomuconate
PE (16:0/20:6)	PA (16:0/16:0)	4-Aminohippuricacid
PE (18:0/18:1)	Piperlongumine	4-Hydroxybenzaldehyde
PE (18:0/22:5)		arg-his
Pentose-phosphate-2		Dambonitol
Phosphocreatine		Guanosine
Pregnanetriol		N-Acetyl-L-histidine
PS (18:1/22:6)		O-Succinyl-L-homoserine
S-3-oxodecanoyl cysteamine		PA (16:0/18:2)
SM (d18:1/22:0)		PC (14:0/14:0)
Sphinganine		Sedoheptulose
Urocanic acid		Thiophene-2-carbonyl-CoA
(2S,4S)-4-Amino-2-hydroxy-2-methylpentanedioic acid
(4S)-4_6-Dihydroxy-2_5-dioxohexanoate
(R)-3-(4-Hydroxyphenyl)lactate
1-(5-Azido-5-deoxy-beta-D-ribofuranosyl)-4-hydroxy-2(1H)-pyrimidinone
1-Deoxy-L-mannitol
1-deoxynojirimycin
2_7-Anhydro-alpha-N-acetylneuraminicacid
2-amino-2,3,7-trideoxy-D-lyxo-hept-6-ulosonic acid
2-Formylglutarate
2-oxo-8-methylthiooctanoic acid
3_4-Dihydroxy-L-phenylalanine(L-Dopa)
3-Demethylubiquinone-9
3-Methylsulfolene
4-Imidazolone-5-propanoate
4'-apo-beta-carotenal
Acetyl-CoA
Arg-Asp (1)
Carnitine (3-hydroxy-C14:2)
CMP-2-aminoethylphosphonate
Coumaric acid
Cystathionine
dCMP(Deoxycytidinemonophosphate)
Deoxyuridine
Dihydrooroticacid
gln-ser
Hydantoin-5-propionate
Leu-Val
Lyso-PE (22:6)
N-Acetyl-D-glucosaminate
N-Acetyl-L-citrulline
N-Acetylglutamine
Orotidine
PA (16:0/18:1)
PC (16:1/16:1)
PC (18:3/18:2)
PE (16:0/18:2)
PE (16:0/22:6)
PE (17:0/20:4)
PE (18:0/20:3)
PE (18:0/22:6)
Photinusluciferin
Prolinamide
PS (16:0/22:6)
PS (18:1/20:4)
PS (18:2/18:2)
Tetraacetylethylenediamine
Thymidine
UDP-D-galacturonate

## Sheet: 1F
Metabolites detected above sheath blank from 10,000 whole bone marrow cells sorted using 0.5x PBS sheath fluid or 1.0x sheath fluid, and using a 70 µm nozzle or a 100 µm nozzle.
		0.5X PBS	0.5X PBS	0.5X PBS
		Mice 1-5	Mice 6-10	Mice 11-15
	70 um	158	158	155
Experiment #		1	2	3
		1X PBS	1X PBS	1X PBS
		Mice 1-5	Mice 6-10	Mice 11-15
	70 um	139	153	155
Experiment #		1	2	3
		0.5X PBS	0.5X PBS	0.5X PBS
		Mice 1-5	Mice 6-10	Mice 11-15
	100 um	129	127	135
Experiment #		1	2	3
		1X PBS	1X PBS	1X PBS
		Mice 1-5	Mice 6-10	Mice 11-15
	100 um	133	131	131
Experiment #		1	2	3
Table Analyzed	2Factor_fully paired_Count_0.5XPBSv1XPBS_0623-0624_2020_V1							Compare each cell mean with the other cell mean in that row											Compare each cell mean with the other cell mean in that column
Two-way RM ANOVA	Matching: Both factors							Number of families	1										Number of families	1
Assume sphericity?	No							Number of comparisons per family	2										Number of comparisons per family	2
Alpha	0.05							Alpha	0.05										Alpha	0.05
Source of Variation	% of total variation	P value	P value summary	Significant?	Geisser-Greenhouse's epsilon			Sidak's multiple comparisons test	Mean Diff.	95.00% CI of diff.	Significant?	Summary	Adjusted P Value						Sidak's multiple comparisons test	Mean Diff.	95.00% CI of diff.	Significant?	Summary	Adjusted P Value
Row Factor	83.16	0.0137	*	Yes	1
Column Factor	1.909	0.2577	ns	No	1			0.5X.PBS - 1X.PBS											70um - 100um
Row Factor x Column Factor	3.742	0.3539	ns	No	1			70um	8	-27.05 to 43.05	No	ns	0.5026						0.5X.PBS	26.67	5.813 to 47.52	Yes	*	0.0312
Subject x Row Factor	2.32							100um	-1.333	-17.77 to 15.11	No	ns	0.8889						1X.PBS	17.33	-17.78 to 52.45	No	ns	0.1776
Subject x Column Factor	1.556
Subject	2.09
								Test details	Mean 1	Mean 2	Mean Diff.	SE of diff.	N1	N2	t	DF			Test details	Mean 1	Mean 2	Mean Diff.	SE of diff.	N1	N2	t	DF
ANOVA table	SS	DF	MS	F (DFn, DFd)	P value
Row Factor	1452	1	1452	F (1.000, 2.000) = 71.70	P=0.0137			0.5X.PBS - 1X.PBS											70um - 100um
Column Factor	33.33	1	33.33	F (1.000, 2.000) = 2.454	P=0.2577			70um	157	149	8	5.686	3	3	1.407	2			0.5X.PBS	157	130.3	26.67	3.383	3	3	7.883	2
Row Factor x Column Factor	65.33	1	65.33	F (1.000, 2.000) = 1.433	P=0.3539			100um	130.3	131.7	-1.333	2.667	3	3	0.5	2			1X.PBS	149	131.7	17.33	5.696	3	3	3.043	2
Subject x Row Factor	40.5	2	20.25
Subject x Column Factor	27.17	2	13.58
Subject	36.5	2	18.25
Residual	91.17	2	45.58
Difference between row means
Mean of 70um	153
Mean of 100um	131
Difference between means	22
SE of difference	2.598
95% CI of difference	10.82 to 33.18
Difference between column means
Mean of 0.5X.PBS	143.7
Mean of 1X.PBS	140.3
Difference between means	3.333
SE of difference	2.128
95% CI of difference	-5.822 to 12.49
Interaction CI
Mean diff, A1 - B1	8
Mean diff, A2 - B2	-1.333
(A1 -B1) - (A2 - B2)	9.333
95% CI of difference	-24.21 to 42.88
(B1 - A1) - (B2 - A2)	-9.333
95% CI of difference	-42.88 to 24.21
Data summary
Number of columns (Column Factor)	2
Number of rows (Row Factor)	2
Number of subjects (Subject)	3
Number of missing values	0

## Sheet: 1G
Number of metabolites detected in 10,000 sorted whole bone marrow (WBM) cells, or 10,000, 20,000, 30,000, 50,000 or 100,000 pipetted WBM cells
	10k Sorted	10k Sorted	10k Sorted
	Mice 1-5	Mice 6-10	Mice 11-15
	158	154	154
Experiment #	1	2	3
	10k	10k	10k
	Mice 1-5	Mice 6-10	Mice 11-15
	152	158	160
Experiment #	1	2	3
	20k	20k	20k
	Mice 1-5	Mice 6-10	Mice 11-15
	178	180	182
Experiment #	1	2	3
	30k	30k	30k
	Mice 1-5	Mice 6-10	Mice 11-15
	203	197	180
Experiment #	1	2	3
	50k	50k	50k
	Mice 1-5	Mice 6-10	Mice 11-15
	217	213	203
Experiment #	1	2	3
	100k	100k	100k
	Mice 1-5	Mice 6-10	Mice 11-15
	232	217	217
Experiment #	1	2	3
Table Analyzed	1Factor_fully paired_Count_Cell_Number_Above_Blank_0623-0624_2020_V1								Number of families	1
									Number of comparisons per family	5
Repeated measures ANOVA summary									Alpha	0.05
Assume sphericity?	No
F	53.1								Dunnett's multiple comparisons test	Mean Diff.	95.00% CI of diff.	Significant?	Summary	Adjusted P Value	B-?
P value	0.0069								10k.Sorted vs. 10k	-1.333	-26.77 to 24.10	No	ns	0.9913	A	10k
P value summary	**								10k.Sorted vs. 20k	-24.67	-41.14 to -8.194	Yes	*	0.0228	C	20k
Statistically significant (P < 0.05)?	Yes								10k.Sorted vs. 30k	-38	-79.31 to 3.308	No	ns	0.0587	D	30k
Geisser-Greenhouse's epsilon	0.2727								10k.Sorted vs. 50k	-55.67	-78.51 to -32.82	Yes	**	0.0087	E	50k
R squared	0.9637								10k.Sorted vs. 100k	-66.67	-91.79 to -41.54	Yes	**	0.0074	F	100k
Was the matching effective?									Test details	Mean 1	Mean 2	Mean Diff.	SE of diff.	n1	n2	q	DF
F	1.875								10k.Sorted vs. 10k	155.3	156.7	-1.333	3.712	3	3	0.3592	2
P value	0.2035								10k.Sorted vs. 20k	155.3	180	-24.67	2.404	3	3	10.26	2
P value summary	ns								10k.Sorted vs. 30k	155.3	193.3	-38	6.028	3	3	6.304	2
Is there significant matching (P < 0.05)?	No								10k.Sorted vs. 50k	155.3	211	-55.67	3.333	3	3	16.7	2
R squared	0.01343								10k.Sorted vs. 100k	155.3	222	-66.67	3.667	3	3	18.18	2
ANOVA table	SS	DF	MS	F (DFn, DFd)	P value
Treatment (between columns)	11432	5	2286	F (1.364, 2.727) = 53.10	P=0.0069
Individual (between rows)	161.4	2	80.72	F (2, 10) = 1.875	P=0.2035
Residual (random)	430.6	10	43.06
Total	12024	17
Data summary
Number of treatments (columns)	6
Number of subjects (rows)	3
Number of missing values	0

## Sheet: 1H
Principle component analysis of 10,000 sorted or pipetted AML and T-ALL cells.
ID	1AML_P	2AML_P	3AML_P	4AML_P	5AML_P	6AML_P	7AML_P	8AML_P	1AML_S	2AML_S	3AML_S	4AML_S	5AML_S	6AML_S	7AML_S	8AML_S	1TALL_P	2TALL_P	3TALL_P	4TALL_P	5TALL_P	6TALL_P	7TALL_P	8TALL_P	1TALL_S	2TALL_S	3TALL_S	4TALL_S	5TALL_S	6TALL_S	7TALL_S	8TALL_S
1-Methylhistidine	18.7783	18.3859	19.1343	18.4905	19.0464	19.0838	19.1348	18.8965	0	18.4534	18.8338	17.9532	18.5676	19.2031	18.3317	18.2613	18.0855	0	18.4367	18.1204	18.5982	18.2335	18.2886	0	18.2172	0	0	0	18.1739	18.5301	0	18.5383
1-Phenylethanol	24.3124	24.4665	24.2345	24.6022	24.1296	24.3183	24.2343	24.2546	25.0707	25.2465	25.099	25.4579	25.1012	24.9393	25.3041	25.1898	25.2044	24.8672	24.9903	25.1512	25.0042	25.0966	25.0477	24.9996	25.7633	25.3715	25.6118	25.3446	25.2367	25.3765	25.9366	25.7319
2',4'-Dihydroxyacetophenone	20.9296	22.2614	21.0442	21.2682	21.1545	21.3852	21.9064	20.8984	22.2029	22.5382	22.8039	21.9975	22.6692	22.6976	22.4981	22.2237	22.545	22.6383	22.0315	22.3006	21.7349	22.1217	22.0081	22.0264	22.6872	22.9089	22.2008	22.2424	21.988	22.1517	22.8479	22.4564
2-/3-Phosphoglycerate	14.5345	14.5914	15.7005	16.2327	16.07	16.0845	15.7965	15.3486	0	14.311	14.0861	14.8262	15.6056	16.3955	16.1319	16.1796	0	15.0036	14.9683	0	0	13.9332	13.7992	0	0	0	15.4125	0	0	0	0	15.061
2-Hydroxybutyrate	19.3606	18.34	19.0556	18.6926	18.5389	18.9652	19.3397	18.8597	19.5104	19.824	19.8689	18.9263	19.3895	19.1596	0	19.5207	19.0475	0	19.8025	19.3392	19.9839	20.0234	18.6381	19.6475	20.0512	20.1065	19.6484	19.1345	18.9204	19.5108	20.1582	19.2903
2-Hydroxyglutarate	21.6083	21.5976	21.3038	21.6079	21.525	21.6967	21.8344	21.7958	21.499	21.6877	21.8465	21.8029	21.4654	22.3007	21.8224	21.3847	20.8243	21.8962	21.6959	21.6881	21.6993	21.6575	21.4402	22.3053	22.1959	20.976	21.7664	21.8683	21.746	21.4952	21.746	21.7503
2-Quinolinecarboxylate	18.1947	18.4766	18.1459	18.1484	18.5348	18.3592	18.5816	18.1373	16.1152	17.3494	17.7401	17.6293	16.0598	17.4061	17.109	15.8826	14.7945	0	14.8029	0	0	0	0	0	0	0	0	0	0	0	14.7973	0
3-Hydroxycarnitine (14:0)	17.4353	16.5989	15.3551	16.246	16.5225	17.1513	16.2153	14.8494	16.4178	0	0	0	0	15.404	0	0	0	0	0	0	0	0	0	0	15.6654	0	0	0	0	0	0	0
3-Hydroxycarnitine (16:0)	16.9077	17.8539	17.5821	17.591	16.299	16.4831	16.4439	0	0	15.599	0	16.2108	0	0	0	0	0	0	0	0	0	0	0	0	0	0	0	0	16.0756	0	0	0
3-Hydroxycarnitine (18:1)	0	0	0	0	0	0	14.1841	16.161	16.0892	0	0	0	0	0	0	0	0	0	0	0	0	0	14.7798	0	15.6506	0	0	0	0	0	0	0
3-Hydroxycarnitine (4:0)	18.1852	18.1147	18.8332	18.437	17.816	18.1276	18.3745	18.4011	17.0373	17.6175	17.2287	17.6743	17.6192	0	17.7542	0	0	0	0	0	0	0	0	0	0	0	0	0	0	0	0	0
3-Hydroxycarnitine (5:0)	17.0721	16.3226	16.1308	17.0526	17.2433	16.4572	16.284	15.9108	0	0	16.6047	0	17.3139	16.1304	16.5555	0	0	0	0	0	0	0	0	0	0	0	0	0	0	0	0	0
3-Hydroxycarnitine (6:0)	18.5712	18.6829	18.8334	18.7139	19.0542	18.927	18.938	18.7268	18.2223	18.876	18.7866	18.8016	18.7941	18.7261	18.7171	18.7265	0	0	14.6484	0	0	0	0	0	0	0	0	0	0	0	0	0
3-Hydroxymethylglutarate	22.3621	22.3037	22.4085	22.4602	22.4058	22.4813	22.548	22.7289	22.6173	22.5152	22.432	22.4346	22.4326	22.5407	22.4205	22.3823	22.1989	22.3297	22.3171	22.2977	22.2075	22.1706	22.3096	22.7713	22.3611	22.2525	22.3099	22.4176	22.2804	22.2146	22.1853	22.2541
3-Hydroxypyruvate	18.2199	17.8981	17.6232	17.2886	17.0636	17.1246	17.8908	17.0381	19.0318	18.5802	18.7394	18.4012	18.6647	18.486	18.5038	17.5522	18.7386	18.2883	18.8094	18.5056	18.3539	18.2675	18.1988	18.1679	19.8637	18.6061	18.9216	18.7043	18.8487	17.9523	18.5831	18.0383
4alpha-Hydroxyformyl-4beta-methyl-5alpha-cholest-8-en-3beta-ol	0	0	0	0	0	0	0	0	0	0	0	0	0	0	0	0	0	0	0	0	0	0	0	0	0	0	0	0	16.9712	17.8681	0	0
4-Guanidinobutanoate	20.3171	20.1892	20.2112	20.5692	20.3786	20.5881	20.5337	21.1774	20.5972	21.7317	20.7031	20.7782	20.3322	20.5737	20.4783	20.2628	20.6681	21.2399	20.8646	21.2468	21.1767	20.8421	21.3296	21.3079	21.2695	21.2899	21.1169	21.24	21.0633	21.1236	21.1017	21.1415
4-Pyridoxate	17.3726	16.0288	16.1989	16.6117	16.6506	17.0662	16.8459	15.8993	18.1757	17.127	18.4361	18.0875	17.4211	0	16.8399	17.9363	17.112	16.628	17.5741	17.4197	16.0594	0	17.0624	16.0599	0	0	16.7566	0	17.5987	18.8562	18.4692	18.959
4-Quinolinecarboxylate	18.1947	18.4766	18.1459	18.1484	18.5348	18.3592	18.5816	18.1373	16.1152	17.3494	17.7401	17.6293	16.0598	17.4061	17.109	15.8826	14.7945	0	14.8029	0	0	0	0	0	0	0	0	0	0	0	14.7973	0
5,6 Dimethylbenzimidazole	18.3193	18.265	19.0256	18.2979	18.5962	18.8677	19.5052	19.048	0	19.8664	19.969	18.6179	19.6258	21.0413	19.9271	20.0169	20.5268	20.366	19.7637	20.3656	19.3905	20.2899	20.0942	19.8937	18.9505	19.6227	21.2148	19.4631	17.7633	20.4291	19.5988	20.0272
5-Aminolevulinate	24.2212	24.6506	24.5184	24.5642	24.5331	24.5004	24.3238	25.9726	24.1741	24.1444	24.3327	24.2425	24.1432	24.3614	24.2708	24.328	24.0282	24.4323	24.0521	24.3625	24.1368	24.4805	24.3071	26.1947	24.4227	24.4888	24.3639	24.5348	24.3411	24.0993	24.4522	24.3479
Acetylaminoadipate	19.625	19.3843	19.576	19.7604	19.7863	19.7852	19.6564	19.9307	18.7153	19.3276	19.3718	18.6096	19.4865	19.2637	19.2053	19.2225	21.0761	21.3035	21.2595	21.0706	21.2546	21.1569	21.2749	21.7565	20.9196	20.7865	20.8018	20.8852	21.0142	20.8218	20.7037	20.8547
Acetylcarnitine	26.0474	26.0155	26.0996	26.203	26.1973	26.1257	26.1553	26.0366	25.5033	25.5515	25.5793	25.528	25.5001	25.6248	25.6224	25.5923	21.4225	21.5725	21.0218	21.0406	20.8761	21.2882	21.0541	21.1852	20.7626	20.9529	20.4562	20.7806	21.018	21.3075	20.3999	20.8315
Acetylcholine	22.7481	22.6918	22.7913	22.9681	22.9781	22.952	22.8387	22.7813	22.3487	22.1799	22.2806	22.3108	22.3346	22.5272	22.3399	22.1785	22.9804	23.0581	22.9507	22.788	22.9236	22.9059	22.9019	22.9457	22.6444	22.7101	22.803	22.7282	22.7282	22.8369	22.7854	22.6202
Adenosine	15.0709	19.1064	19.2093	16.643	17.9837	20.0518	20.1087	18.7657	14.59	0	16.0601	16.8058	20.3582	17.8588	20.5292	20.7598	18.2697	19.8932	16.2232	17.1621	18.9069	20.7793	20.3975	21.1293	17.5686	17.9555	17.2233	17.4622	20.5122	20.5199	18.7675	20.8658
Adenosine diphosphate	22.6515	22.4447	22.8268	22.8302	22.8978	22.9186	22.7869	23.3849	22.6836	22.8474	22.9804	23.1078	23.1587	23.3673	23.2481	23.3486	22.4813	22.4987	22.3996	22.3394	22.6512	22.3863	22.4837	22.9569	22.7739	23.2035	23.2668	23.2177	23.1901	23.0827	22.9051	23.0337
Adenosine diphosphate ribose	0	0	0	0	0	13.5328	0	0	15.4295	13.9444	0	0	0	14.2278	0	0	18.7431	19.1342	19.1448	18.7033	19.2048	19.2091	19.3459	19.6507	17.1641	17.0311	17.9152	16.6414	17.2397	17.5963	17.4417	17.8972
Adenosine monophosphate	20.9428	20.9738	21.0312	21.0332	21.1749	20.6941	20.8092	20.7543	20.5545	21.8015	21.8967	22.1611	21.928	22.1155	21.8199	22.0217	20.4831	20.2961	20.4918	19.9798	20.3454	20.0956	20.3091	20.1827	21.3813	22.0884	21.6988	21.5978	21.6465	21.4414	21.2039	21.2543
Adenosine triphosphate	22.0714	21.9155	22.6145	22.6209	22.805	22.7908	22.4735	23.2579	20.7294	21.1342	21.6926	21.6154	21.625	21.777	22.2052	21.8175	22.43	22.2507	22.2813	22.1352	22.2871	22.2936	22.83	22.8691	21.0484	21.3057	21.8076	21.7402	21.9203	22.0203	22.0901	22.0952
ADP-ribose	0	0	14.2597	0	0	14.3207	0	0	0	0	0	0	0	0	15.0065	0	19.6065	20.1565	19.5393	19.5951	19.9485	19.7801	19.8945	20.3328	17.5701	16.8013	17.8566	16.5952	18.0346	17.6542	15.7315	18.3735
Ala-Leu	0	12.9998	13.3094	0	0	0	0	0	0	0	0	0	13.9293	0	13.3829	0	13.8253	13.8712	0	0	0	0	0	0	0	0	0	0	0	0	15.0265	13.3551
Alanine	21.3088	21.5378	21.7991	21.6854	21.7236	21.246	21.1128	21.4199	21.1535	21.8124	21.8937	21.7131	21.69	22.0073	21.7195	21.4373	22.5222	22.4674	22.9432	22.8241	22.3299	22.3686	22.5934	22.7372	22.559	22.6753	22.4655	23.0973	22.8983	22.8729	22.7559	22.1409
Allantoin	0	15.8425	15.8709	16.0303	15.2968	16.4791	17.0827	15.9827	0	0	0	0	0	0	0	16.0885	0	0	0	0	0	0	0	0	0	0	0	0	0	0	16.8593	0
alpha-Ketoglutarate	19.0956	18.6081	18.3679	18.8351	17.9948	18.8274	18.0795	19.006	19.238	19.3526	19.0409	18.6967	19.0781	18.8444	0	18.9748	0	17.6838	17.7281	16.6244	0	18.5411	0	17.764	18.6216	0	0	18.2503	18.4011	18.381	17.3934	19.038
Arginine	26.726	26.6654	26.6789	26.8299	26.8542	26.8446	26.8797	26.9781	25.926	25.8403	25.6498	25.6395	25.624	25.8123	25.755	25.9047	27.1768	27.2323	27.1234	27.038	27.1607	27.2103	27.3035	27.4481	26.6517	26.6483	26.6022	26.7783	26.6897	26.8277	26.7187	26.7896
Argininosuccinate	18.4082	18.3568	18.4263	18.8865	18.695	18.9679	18.6175	19.4099	15.219	0	0	0	0	0	0	0	19.1463	19.6485	19.3101	19.1123	19.6878	19.0755	19.6092	20.1263	18.916	18.4463	18.276	19.383	19.2775	19.2671	18.5761	18.9573
Asparagine	23.1128	23.0916	23.1799	23.2766	23.8795	23.3439	23.2636	23.1814	22.4085	22.3409	22.5978	22.8225	22.6482	22.6122	22.5462	22.5713	23.1267	23.2858	23.3188	23.1152	23.1973	23.1982	23.327	23.2581	22.7399	22.8879	23.0582	23.1862	22.9656	23.1775	22.8169	22.9073
Aspartate	24.5227	24.4007	24.6339	24.7033	24.7582	24.7353	24.6873	24.7799	23.8189	23.7986	24.0078	24.0021	23.9561	24.2074	23.9773	24.0987	26.0536	26.251	26.342	26.0686	26.3181	26.1759	26.3211	26.43	25.7958	25.8255	25.8907	26.1039	25.9707	26.1207	25.8825	25.9662
Azelate	19.3287	19.687	18.9351	19.7956	20.1098	19.4698	20.7215	20.9292	22.5006	22.5329	21.2957	20.9489	20.9377	20.4737	20.6223	20.9674	20.3801	20.427	19.9836	19.8809	20.0478	21.1486	20.8497	22.0195	20.5784	20.7146	20.725	20.7866	20.6001	20.8613	20.6299	20.7753
beta-Glycerophosphate	15.5425	15.3252	15.3715	16.0123	15.6305	16.659	16.5439	16.2738	14.4721	15.2869	13.9823	0	15.0573	14.2859	15.0559	14.4999	20.6656	20.8872	21.0404	20.6041	20.8413	20.7142	20.845	21.0896	19.8933	20.2629	20.1783	20.3657	20.2283	20.4526	20.1945	20.3069
Carnitinamide	21.0791	20.882	21.0433	21.183	21.3039	21.273	21.1358	21.1837	20.3512	20.2161	20.3163	20.1476	20.2534	20.4534	20.4111	20.2033	17.3087	17.7083	18.2093	17.4443	18.3349	17.5812	18.3834	0	0	16.8843	16.9101	17.0331	17.1206	0	0	0
Carnitine	22.4132	22.3573	22.404	22.6616	22.5143	22.486	22.5411	22.426	22.1789	22.2496	21.9545	22.1695	22.1234	22.2137	22.2276	22.1343	21.0586	21.1175	20.3803	20.579	20.6508	20.7071	20.6502	20.9563	20.8814	20.7931	20.3757	20.7085	20.6646	21.0311	20.2919	20.5645
Carnitine (12:0)	16.4998	15.7048	16.5962	16.2519	0	14.7304	16.5072	0	16.5669	15.6387	0	15.5875	0	16.5475	14.5278	16.9697	15.4604	0	14.6568	0	0	0	0	0	0	0	15.7144	0	0	0	0	0
Carnitine (14:0)	20.6065	20.848	20.6046	20.9178	20.915	20.9141	20.8513	20.1104	20.4252	19.7349	20.1987	20.363	20.2951	20.0864	20.0065	20.0706	0	15.4192	15.3036	0	15.2402	0	0	0	0	0	0	0	16.2169	16.6249	0	15.4493
Carnitine (16:0)	23.4557	23.4851	23.3953	23.5473	23.4964	23.5378	23.3477	23.0589	22.7855	22.585	22.6388	22.5527	22.3585	22.4635	22.5153	22.5092	21.7169	21.8174	21.4708	21.1843	21.376	21.5587	21.4745	21.0867	20.8403	21.0369	20.2468	20.6093	20.5893	20.3606	19.9935	19.533
Carnitine (16:1)	20.632	20.3078	20.4552	20.5939	20.6538	20.5022	20.5414	20.1044	19.2464	17.9856	16.4919	18.041	18.5874	18.2107	17.6352	16.1753	0	0	0	0	0	15.5702	15.9561	15.5832	0	0	16.1104	15.8441	0	0	0	0
Carnitine (17:0)	0	0	0	16.1269	17.02	16.13	0	15.7735	16.1882	17.2545	0	17.049	16.7999	16.9821	0	0	0	0	0	0	0	0	0	15.7191	0	0	0	0	0	0	0	16.2646
Carnitine (18:0)	18.9779	19.5681	19.0467	19.2284	19.2104	19.5015	18.7137	18.5748	19.9145	20.0176	20.2829	19.8148	19.9415	19.9852	20.522	20.2068	0	15.9618	0	0	16.2097	0	0	0	0	0	0	0	0	0	0	16.4794
Carnitine (18:1)	21.0444	20.9663	20.8851	21.1095	21.2675	21.049	20.8777	20.7717	20.8664	20.3933	20.8754	20.354	19.7582	20.4235	20.6315	20.8055	16.0311	15.4522	0	0	16.1782	0	15.9849	0	0	0	0	16.6696	0	0	0	0
Carnitine (3:0)	22.2097	22.319	22.2557	22.3974	22.392	22.3413	22.3256	21.9875	22.2262	22.3984	22.5487	22.5663	22.6065	22.5714	22.7012	22.5351	19.1947	19.7379	18.2855	18.2117	18.6055	19.0512	18.756	18.9077	18.2748	19.1916	18.2071	0	18.9117	18.9973	18.8113	18.5338
Carnitine (4:0)	19.3128	19.4808	19.4683	19.6067	19.5576	19.7136	19.912	19.1466	19.3474	19.5471	19.0012	18.6608	19.6912	18.5999	19.2755	19.7539	18.8342	19.425	18.5415	18.199	18.5043	19.6549	19.5336	18.8549	17.9759	18.5896	17.7568	18.0398	19.2329	18.9391	16.9509	18.3246
Carnitine (5:0)	20.5086	20.4428	20.5012	20.4042	20.6848	20.5486	20.6226	20.3521	19.4171	19.7037	19.8515	19.6271	20.2035	19.418	20.0166	19.5463	0	0	0	0	0	0	0	0	0	0	0	0	0	0	0	0
Carnosine	14.1236	0	0	0	14.1436	0	0	0	0	0	0	0	0	0	0	0	0	0	0	0	0	15.2601	0	0	0	14.9793	0	15.1782	0	0	0	0
CDP-ethanolamine	20.2822	20.1305	20.3244	20.4751	20.4956	20.5161	20.3342	20.6967	19.6612	19.6747	19.8847	19.8391	19.7095	19.942	19.9718	19.9547	19.5447	19.7193	19.6322	19.5268	19.5632	19.4823	19.7967	20.1199	18.8412	19.2271	19.1534	19.5095	19.4932	19.4706	19.2356	19.528
Cellobiose	0	0	15.0635	0	0	13.5799	17.4142	14.4418	0	18.0304	0	17.5321	15.6033	0	0	0	0	14.1674	0	16.3178	15.9132	0	19.0207	0	17.2336	0	18.3812	15.0029	16.1368	17.8221	0	15.7373
Choline	26.071	26.0498	26.0453	24.8484	26.154	25.7521	25.8533	24.8831	25.8691	25.8775	24.9764	25.6998	25.4604	25.904	25.462	25.5692	26.5822	26.566	26.5318	26.2974	26.1397	25.7877	25.9864	25.3327	26.569	26.6219	26.4425	26.7441	26.0283	25.8058	26.5527	26.4342
cis-4-Hydroxyproline	24.2212	24.6506	24.5184	24.5642	24.5331	24.5004	24.3238	25.9726	24.1741	24.1444	24.3327	24.2425	24.1432	24.3614	24.2708	24.328	24.0282	24.4323	24.0521	24.3625	24.1368	24.4805	24.3071	26.1947	24.4227	24.4888	24.3639	24.5348	24.3411	24.0993	24.4522	24.3479
Citicoline	20.1042	20.0786	20.2695	20.3904	20.4305	20.6312	20.3883	20.3925	19.0043	19.1765	19.8135	19.9017	19.6218	20.121	19.8935	19.9657	20.41	20.3446	20.5068	20.3593	20.5146	20.3543	20.6687	20.6734	19.9234	20.3503	19.9458	20.1194	20.2511	20.2018	20.0536	20.2355
Citramalate	21.8273	21.9718	21.3038	21.6079	21.525	22.2622	21.8344	21.7958	21.499	21.6877	22.0544	22.1429	21.4654	22.4838	22.0522	21.3847	20.8243	21.8962	21.6959	21.6881	21.6993	21.6575	21.4402	22.3053	22.5259	20.976	21.7664	21.8683	21.746	21.4952	21.9901	21.7503
Citrulline	17.908	18.5375	17.7477	18.3027	17.8173	18.0831	18.3714	18.0092	17.1194	18.9046	16.3989	18.3962	17.2154	17.6946	18.1587	18.2537	18.2907	18.273	18.2185	18.0433	17.4872	18.5345	17.9619	16.6289	17.2477	17.2504	16.6946	18.0789	18.6572	18.696	18.1718	19.0207
CMP-2-aminoethylphosphonate	16.9195	16.5153	17.3831	17.389	17.1653	17.3468	17.1765	17.7853	14.3953	13.8044	16.5785	16.9271	15.8152	16.026	15.1514	15.0608	0	16.256	16.1334	15.1804	13.9262	15.2891	0	15.6472	15.4243	14.4735	14.0988	0	14.1628	13.8308	15.0663	16.047
Cortisol 21-acetate	0	17.2043	16.5123	0	0	0	16.4047	0	0	18.0533	17.1468	0	17.123	0	0	17.4116	17.9205	17.2572	0	0	18.6532	17.4405	18.7104	0	0	18.8084	17.3756	17.0752	0	17.7197	0	18.3648
Creatine	27.0153	27.1873	27.1842	27.3547	27.234	27.1955	27.1172	28.1722	26.8288	26.9371	27.1584	27.0599	27.0296	27.0947	27.0259	27.0718	25.0151	25.2613	25.0759	25.1286	25.0545	25.2181	25.0956	26.3378	24.9052	25.1669	25.0176	25.1162	24.968	24.8967	25.0444	24.907
Creatinine	23.3269	23.4685	23.4206	23.3664	23.4714	23.4537	23.3935	22.941	22.3682	23.2329	22.7488	22.9597	23.1915	22.7738	23.1736	23.2543	23.2248	23.3783	22.9653	22.8338	22.8776	23.2761	23.0228	23.0399	22.6802	22.9866	23.1142	22.7783	22.9425	23.3636	22.6857	22.9583
Cyclic ADP-ribose	21.3769	21.202	21.3387	21.5992	21.6211	21.5629	21.486	21.8195	20.8787	20.7727	21.0241	20.9917	20.9799	21.2779	21.0578	21.0755	20.5782	20.4465	20.6652	20.2549	20.442	20.5206	20.734	21.0105	19.9757	20.4505	20.2206	20.3791	20.398	20.4899	20.3543	20.3949
Cys-Gly	16.3734	16.1719	15.0926	15.2644	15.6731	15.5532	15.5357	16.4011	16.0078	0	0	16.1686	15.431	0	15.5985	15.1133	18.0787	18.74	18.2469	17.8088	18.7242	17.6545	17.8801	18.352	17.4099	15.4662	17.7833	18.3601	17.838	17.8112	17.2985	17.1506
Cystathionine	15.441	15.9523	0	16.4284	16.5841	15.2623	16.8861	16.2549	0	0	0	0	0	0	0	0	0	0	0	0	0	0	0	0	0	0	0	0	0	0	0	0
Cytidine diphosphate	16.1296	14.9759	17.162	16.4432	17.3833	17.0947	17.4863	17.6328	0	15.1209	15.89	16.51	15.1339	16.9959	17.0591	16.8134	16.5364	16.5442	16.652	17.4875	17.1434	17.2933	16.0252	17.8	17.5276	17.5614	17.1042	17.4026	18.0222	17.7467	17.6804	18.0713
Cytidine monophosphate	13.6279	13.9663	14.6271	0	13.2277	13.5549	0	0	0	0	0	14.2966	16.2097	16.2219	14.2766	16.2513	14.0271	14.0081	0	14.6735	15.3113	0	14.7957	0	15.997	16.7793	14.3969	0	15.0208	15.1411	16.2367	16.3245
Decanoate	23.8852	23.5297	24.1997	24.0517	24.4617	24.4678	23.5059	23.6211	25.7864	25.6209	24.9588	24.6466	25.2827	24.9168	25.074	25.2351	24.5347	24.6605	24.0694	24.9803	24.6423	24.4902	24.6125	24.3682	25.9037	25.0144	24.9902	25.4281	24.827	24.8607	25.3858	25.0529
Deoxycarnitine	22.7481	22.6918	22.7913	22.9681	22.9781	22.952	22.8426	22.7813	22.3487	22.1799	22.2806	22.3108	22.3346	22.5272	22.3399	22.1785	22.9804	23.0581	22.9507	22.788	22.9236	22.9059	22.9067	22.9457	22.6444	22.7101	22.803	22.7282	22.7282	22.8369	22.7854	22.6202
Deoxyribose	16.646	14.7475	17.0205	0	16.1893	15.7359	0	17.4463	17.5275	16.9942	0	16.734	16.9881	0	0	16.6419	0	0	16.9106	17.3557	16.6232	16.6643	16.1868	0	17.3972	15.9997	17.5439	0	0	17.2839	17.6138	18.4249
Dethiobiotin	17.7255	19.3033	17.7184	18.8963	17.8253	17.9729	19.0632	17.0655	16.9216	19.3195	19.5663	18.1471	19.4549	19.407	20.2607	18.1952	20.0752	20.3472	18.1166	18.3229	19.3671	19.2139	19.7346	18.619	18.1916	20.2375	19.4394	19.9703	19.123	18.157	20.1373	18.7645
Estradiol 17-alpha	0	0	0	0	0	0	16.6496	0	0	0	0	0	0	0	17.2705	0	0	0	0	0	0	0	0	0	0	16.731	0	0	0	0	17.2251	0
FA (12:0)	25.411	24.7982	26.048	24.4827	24.658	26.7264	25.1922	25.7628	26.6041	25.8621	25.347	26.5742	25.6488	26.4993	25.9316	27.4117	25.5734	25.2191	27.1359	26.0283	25.8207	26.1177	25.9198	26.2228	27.9105	26.3788	26.5255	25.5702	28.4988	25.9349	26.0549	27.1598
FA (14:0)	26.0093	25.1126	25.4679	25.1939	25.0907	25.7301	25.0909	25.5843	28.0339	26.53	26.0537	26.5733	26.1783	26.097	26.7441	26.914	25.8335	25.9422	26.5505	26.0021	26.3112	26.1902	26.4911	25.7321	26.9547	26.4962	26.5798	26.222	27.1382	26.3177	26.3918	26.7057
FA (16:0)	31.8281	29.3249	28.8194	29.2139	28.9635	28.8752	28.7549	28.4829	31.2705	30.4028	30.1361	29.9821	30.0121	29.755	29.9683	29.5121	30.1266	29.7829	29.5514	29.6705	30.2113	29.453	29.4958	29.354	30.9804	30.5097	30.1209	30.11	29.6998	29.9614	30.9296	30.1108
FA (16:1)	24.4652	23.5059	24.7581	24.4898	24.4407	24.2125	24.1245	24.9447	28.3294	25.693	24.4804	25.7613	25.0211	24.8861	26.1175	25.9172	24.7907	24.7318	26.076	25.0201	25.7702	25.2029	26.5201	24.6995	25.4966	25.7372	25.9594	25.2099	27.0356	25.3331	25.4044	25.7592
FA (18:0)	31.0525	28.3187	27.93	28.2479	27.785	27.7623	27.6919	27.4883	30.2616	29.2395	28.9218	28.9501	28.8497	28.5264	28.7564	28.3622	28.8681	28.6066	28.4338	28.4213	29.3484	28.3364	28.3562	28.021	30.0181	29.3015	29.1999	28.9201	28.6042	28.7571	29.7834	28.9153
FA (18:1)	27.0009	24.5069	24.4959	25.0687	24.9675	24.2486	24.3467	24.5205	28.1132	25.6882	25.1628	25.4445	25.3287	25.2508	25.4658	25.3624	24.9622	25.1369	25.099	25.1645	25.7457	25.1566	25.7865	24.565	25.6776	25.5014	25.2627	25.1113	26.2835	25.4509	26.1987	25.4678
FA (20:0)	24.5121	22.6174	22.1202	22.6827	22.4139	22.1421	22.1675	21.7981	24.917	23.6517	23.2583	23.468	23.0772	22.879	22.9804	22.8448	22.659	22.8578	22.9962	22.8791	23.4822	22.8404	22.9219	22.5941	23.6327	23.2028	22.9043	23.205	22.9852	22.8741	23.6542	23.1452
FA (20:2)	0	18.4109	15.6564	17.4083	18.5661	15.8752	0	16.3748	21.7971	0	16.911	16.8382	17.9056	0	0	17.0601	17.1608	16.6455	18.633	0	0	0	17.5908	0	0	0	16.9214	0	19.2435	0	0	0
FA (8:0)	25.0307	24.6732	25.47	24.8951	25.3868	25.2148	24.4895	25.0395	26.827	26.3675	25.9826	25.8392	26.2154	25.8612	26.0169	26.1316	25.6472	25.5037	25.4449	26.1732	25.7902	25.6933	25.6487	25.3716	26.7381	25.9557	26.4006	26.0397	25.8223	26.1602	26.4633	26.299
Fructose 6-phosphate	21.846	21.7482	21.8846	22.0416	22.2224	22.1044	22.2422	22.5128	21.3043	21.5324	21.7954	21.8625	21.8034	21.9628	21.8047	21.9414	14.3457	15.0493	14.1435	15.5506	15.7479	14.6287	14.9426	14.5409	0	0	0	0	14.1183	0	0	14.9193
Fumarate	21.2743	21.1181	20.4924	21.351	20.6973	20.8733	20.2429	21.2669	0	21.0041	21.0745	20.4204	21.2201	21.0293	21.2784	20.2884	21.2607	21.7385	20.8132	22.1904	21.9317	21.0578	21.2319	22.6594	21.735	21.2843	20.7684	22.0519	21.8233	21.7922	21.9513	20.7638
Galactose 1-phosphate	21.846	21.7482	21.8846	22.0416	22.2224	22.1044	22.2422	22.5128	21.3043	21.5324	21.7954	21.8625	21.8034	21.9628	21.8047	21.9414	14.3457	15.0493	14.1435	15.5506	15.7479	14.6287	14.9426	14.5409	0	0	0	0	14.1183	0	0	14.9193
Gamma-aminobutyrate	24.1848	24.3928	24.4645	24.534	24.6381	24.5069	24.5533	24.4375	23.8517	24.6504	24.654	24.6821	24.6872	24.8122	24.8038	24.5834	24.3842	24.5305	24.2435	24.297	24.4089	23.8311	24.572	24.4	24.4674	24.7033	24.0967	24.8379	24.4643	24.4561	24.7294	24.1598
Glucosamine 6-phosphate	0	0	0	0	0	0	0	0	0	0	0	0	0	0	0	0	0	0	0	14.0902	16.2585	14.1606	15.849	0	0	0	0	0	15.1144	0	0	0
Glucose 6-phosphate	18.106	17.7848	18.3798	18.7836	18.3611	18.2944	18.726	19.1409	17.9067	15.0489	17.4431	16.9794	16.8604	17.4507	17.0841	17.5512	17.6499	17.2404	16.9227	15.8819	16.9192	15.8967	17.2929	17.5882	15.5256	0	15.4367	16.7162	14.899	0	16.3925	16.2044
Glucuronolactone	0	12.8169	0	12.6771	12.5853	0	13.7805	0	0	14.8799	0	0	0	0	0	0	13.8808	0	0	0	0	14.2082	0	0	0	0	0	0	13.5467	0	0	14.3599
Glu-Glu	13.441	0	15.4974	14.4311	13.8985	14.6412	13.4532	0	0	0	0	0	14.3574	0	0	0	0	0	0	0	0	0	0	0	0	0	0	0	0	0	0	0
Glu-Pro	19.1155	18.8773	19.1017	19.1916	19.0976	19.1642	18.8943	18.8663	17.4369	18.432	18.2521	16.7525	17.2811	17.3468	17.7068	17.846	18.0156	18.778	18.0375	18.7698	17.5902	17.5822	18.4548	17.888	17.594	17.6727	0	16.9814	18.1493	0	17.9615	17.9939
Glutamate	27.6086	27.5479	27.7822	27.9152	27.9269	27.8388	27.8269	27.9733	26.9705	27.1439	27.3647	27.4522	27.3257	27.5777	27.4523	27.502	27.9941	28.1817	28.1673	27.9802	28.1109	28.0332	28.1403	28.3265	27.5571	27.6927	27.778	27.9144	27.8317	27.8117	27.7197	27.8262
Glutamine	28.3273	28.316	28.3963	28.5849	28.5394	28.4819	28.4466	28.2681	27.6822	27.9128	27.8875	27.8459	27.8391	27.9928	27.8693	27.9277	28.4858	28.5596	28.5844	28.5224	28.5684	28.4823	28.6515	28.4977	28.038	28.21	28.2717	28.3504	28.1673	28.3097	28.1075	28.0992
Glutathione	23.5572	23.4806	23.6098	23.7795	23.8077	23.6554	23.6197	23.752	23.5621	23.7008	23.8308	23.7871	23.6449	23.9081	23.6514	23.732	25.1078	25.1902	25.2431	24.9404	25.1631	25.0328	25.2302	25.2893	24.6916	24.9093	24.7939	24.9911	24.9277	24.9008	24.8544	24.813
Glutathione disulfide	20.7837	20.9316	20.9058	21.0826	20.9353	20.7685	20.9413	21.1906	20.9248	20.8469	20.7803	20.7931	20.6789	20.7996	20.5772	20.5157	22.4938	22.8465	22.6695	22.3939	22.5786	22.6331	22.7836	23.2927	22.3149	22.2918	22.3799	22.435	22.2461	22.5204	22.1774	22.3178
Glyceraldehyde 3-phosphate	19.7113	19.6335	19.9498	20.1656	20.1392	20.2522	20.27	20.2204	19.0848	18.9317	19.242	19.4501	19.5741	19.6816	19.5953	19.6174	18.1261	18.3447	18.2833	17.2022	17.7976	17.6718	18.1507	18.4679	14.8673	17.354	17.3514	18.0626	17.9451	17.0685	17.6318	18.1074
Glycerol 3-phosphate	15.5425	15.3252	15.3715	16.0123	15.6305	16.659	16.5439	16.2738	14.4721	15.2869	13.9823	0	15.0573	14.2859	15.0559	14.4999	20.6656	20.8872	21.0404	20.6041	20.8413	20.7142	20.845	21.0896	19.8933	20.2629	20.1783	20.3657	20.2283	20.4526	20.1945	20.3069
Glycerol cyclic phosphate	16.6034	16.9515	15.3865	14.7874	15.646	15.3193	15.0356	16.5841	17.1491	16.6274	15.186	16.064	16.4587	16.0938	16.7929	16.6904	16.9913	16.7952	16.5862	16.6498	16.4826	16.665	16.6216	17.3667	16.5245	17.4615	16.8753	17.3166	17.2764	16.2012	15.3826	15.1997
Glycerophosphocholine	24.4476	24.541	24.7432	24.8074	24.8844	24.8146	24.8933	25.2763	23.3967	23.4849	23.7752	23.7199	23.661	23.9015	23.7869	23.8698	25.6405	25.9352	25.8667	25.8078	25.8769	25.8983	26.1168	26.505	24.9832	25.2814	25.3772	25.4231	25.3124	25.4131	25.446	25.3803
Glycerophosphoethanolamine	21.697	21.5849	21.7216	21.8283	21.8504	21.7601	21.8332	22.0159	21.0487	20.9914	21.1326	21.0829	21.061	21.2149	21.1734	21.081	23.4595	23.5714	23.5591	23.4528	23.5301	23.4987	23.6466	23.8138	23.1378	23.2063	23.2573	23.3564	23.2409	23.3004	23.1835	23.191
Glycerophosphoinositol	20.5074	20.3196	20.485	20.7506	20.616	20.6023	20.7409	20.9568	19.702	19.7183	20.033	19.8077	19.9097	20.1255	19.8801	20.0008	19.6673	19.849	19.6671	19.5287	19.9102	19.9479	19.9237	20.4044	19.1097	19.3945	19.1035	19.4525	19.5078	19.57	19.3796	19.451
Guanosine diphosphate mannose	16.2541	15.7909	16.6115	16.5533	16.4766	16.6846	16.6111	16.8242	0	0	14.4443	0	14.2603	15.2149	15.5381	13.9438	14.0938	16.4916	15.7592	13.8433	15.8924	16.0825	16.0023	17.1393	0	0	13.8464	0	15.8082	13.8355	13.9398	14.2854
Guanosine monophosphate	0	0	13.4508	15.3455	14.2813	15.0588	0	13.8082	0	15.1436	16.7727	16.4581	16.8056	17.2816	15.0532	15.7933	0	14.7524	0	0	0	0	0	0	0	0	0	15.3362	15.8859	15.1959	0	0
Hexitols	17.66	17.8864	17.6095	17.6935	17.7559	17.6643	17.8378	18.2001	16.3869	19.0369	17.46	18.4982	16.8491	16.8255	16.3386	16.4768	17.2287	18.1185	16.6781	16.6157	17.2466	17.0415	17.6033	17.6154	17.825	16.0366	15.743	16.8052	17.5904	16.0263	14.8867	16.8938
Hexosamines	14.5862	16.3644	15.3967	15.838	16.896	15.3925	0	15.9629	16.7306	15.8929	17.2203	16.9341	17.5178	0	17.947	16.7527	16.9896	16.4932	17.1446	16.5545	16.0205	17.4127	15.3995	17.7723	16.5897	16.6563	17.3561	15.2118	17.399	17.4525	17.4315	16.1612
Histidine	23.5651	23.5522	23.8531	23.7671	23.8193	23.8027	23.7848	23.9368	22.8616	23.4422	23.3502	23.362	23.3045	23.5007	23.5829	23.4548	23.1537	23.4934	23.2091	23.389	23.319	23.3972	23.4867	23.6008	22.9628	23.2777	23.3722	23.4645	23.2969	23.3222	23.2211	23.5265
Homocysteine thiolactone	0	16.1379	16.0605	0	0	0	16.0653	0	17.9888	0	0	0	0	0	0	0	0	17.1577	0	0	0	0	0	0	17.8467	0	0	0	0	0	16.9823	0
Hydroxy-FA (10:0)	20.6143	20.6651	20.943	20.6794	20.737	20.889	21.1139	20.3036	22.0355	21.6309	21.3849	21.6607	21.1864	21.4585	21.3103	21.6536	21.2412	21.0572	21.4749	21.6573	21.2775	21.3302	21.3567	20.9719	22.2597	21.6016	21.9006	21.5394	21.9198	21.7739	21.803	22.1492
Hydroxy-FA (12:0)	21.2161	20.7039	21.5108	21.4834	20.9407	21.2533	20.7361	20.5403	22.0809	21.1964	20.7579	22.0137	20.3746	21.6368	21.4001	22.2177	21.3185	20.9332	22.0565	21.4957	21.5254	21.7841	21.8465	21.06	22.3078	21.5018	21.5847	22.4043	22.2823	21.8359	20.9129	21.9651
Hydroxy-FA (18:1)	23.4563	22.7381	22.4833	23.016	22.3974	22.0689	22.5112	22.2205	24.1963	23.4114	23.3132	23.4309	23.3174	23.2737	23.0445	23.0819	23.1168	23.2376	23.2345	22.9704	22.9285	22.8309	23.0438	23.1565	23.9825	23.435	23.4886	23.365	23.4714	23.493	23.7242	23.7483
Hydroxy-FA (7:0)	22.2381	22.0916	22.4696	22.5214	22.3928	22.0938	22.5406	22.1234	23.6193	23.0486	22.743	22.8948	22.9237	22.7901	22.886	23.3356	23.0027	22.8792	23.0606	23.2028	23.0228	23.2976	23.0442	22.6545	23.2475	23.2797	23.4238	23.1183	23.2063	23.5999	23.4276	23.7468
Hydroxy-FA (8:0)	21.4624	21.1122	21.282	20.9742	21.1021	21.1356	21.3595	20.9576	22.2194	21.9156	21.8286	22.0842	21.9307	21.8521	21.5069	22.0343	21.9504	21.7699	21.8898	21.9311	21.763	21.7536	21.6908	21.776	22.3806	22.1409	22.2883	22.1486	22.0583	22.2221	22.0835	22.3477
Hypotaurine	20.3755	20.2672	20.5484	20.6656	20.679	20.5078	20.3087	20.9054	19.8372	19.862	20.0284	20.1035	19.8926	19.9668	20.1146	19.967	21.782	21.9371	21.9257	21.8598	21.9349	21.8813	21.9932	22.1211	21.547	21.6862	21.8272	21.8767	21.6652	21.8122	21.7893	21.7021
Hypoxanthine	20.4572	20.8366	20.9682	21.2184	20.9236	20.8096	21.0627	20.6486	18.6942	19.1844	20.083	20.1573	20.4635	20.081	20.1299	20.672	16.9488	16.6047	17.096	0	16.0319	17.9844	18.2755	18.0203	17.1772	19.3892	20.0765	19.7574	19.7518	19.8162	18.1881	20.0358
Indole	24.4765	24.0412	24.2441	26.1571	24.6919	24.3114	24.3346	24.2664	25.3523	25.1756	24.8283	25.4684	24.8968	25.1314	25.224	25.9293	25.0073	24.9098	25.3317	25.0892	25.1108	25.1018	25.5263	24.5477	26.3889	25.2297	25.0312	26.713	25.8182	26.1451	25.4406	25.585
Indole-3-acrylate	18.7929	18.9876	19.0015	18.8553	19.2361	18.6909	19.0042	18.5598	17.8368	18.4822	18.1267	18.1325	18.2388	18.2237	18.5708	18.3654	0	15.13	0	15.2308	15.0485	0	16.6251	0	0	0	0	0	0	0	0	0
Inosine monophosphate	17.7118	18.019	17.9782	16.9583	17.0808	17.9489	17.1502	19.0408	17.3606	18.1967	19.4578	19.2918	19.2619	19.9363	19.592	18.7165	0	0	0	0	14.8154	0	0	15.3098	18.2541	18.9998	17.3886	18.082	16.264	16.888	17.4449	16.6076
Isoleucine	22.8242	22.8317	22.905	22.9549	22.962	22.8269	22.7978	22.6038	21.8908	21.7089	21.64	21.6398	22.1605	21.5542	21.5894	21.5788	22.2438	22.3507	22.1882	22.0718	22.2553	22.2461	22.2968	21.8882	21.8628	21.6314	21.6237	21.8522	21.7786	21.7217	21.8536	21.6923
Itaconate	21.8463	21.4859	21.2897	21.3447	21.5226	21.1322	21.6282	0	22.4537	21.8475	21.6372	21.5701	21.4645	21.7738	21.5264	22.3341	20.6392	20.5704	21.8294	22.3157	22.4188	22.6992	21.7931	0	21.3986	20.5537	22.5209	21.3292	22.1097	23.3792	21.8398	22.4294
Lactate	28.6201	27.5445	28.9067	27.6322	28.525	28.4287	27.6572	28.9513	29.1358	29.3436	28.7774	29.3669	29.268	28.9918	28.3126	29.6981	28.514	27.8734	28.8662	29.4877	29.4517	29.4489	28.751	29.2087	29.7833	29.4992	29.6333	28.6558	29.1346	29.6033	29.3614	29.9558
Leucine	22.8924	22.8511	22.8171	22.9609	23.0727	22.9884	22.8943	22.5965	22.0493	22.0129	21.7924	21.9345	22.0801	21.7397	22.8047	21.8379	22.3539	22.3627	22.3101	22.0376	22.3554	22.3368	22.2802	22.1138	21.8347	22.0059	22.784	21.9005	21.7655	22.0931	21.9087	21.8543
Leu-Leu	20.0767	21.9648	20.0413	21.0329	20.7815	20.3828	21.4394	0	20.9549	21.1507	22.1551	21.3461	22.0725	21.4775	21.8146	20.8763	22.1581	22.3649	20.7032	21.7777	21.1676	21.4635	21.5378	0	21.1591	22.333	21.5345	21.7674	21.2794	21.1928	22.0007	21.6012
Leu-Pro	18.5668	18.5951	18.1578	18.5074	18.7914	18.7657	18.6663	18.357	18.0693	17.56	18.443	18.0609	18.0426	18.4155	17.7429	16.8947	18.7821	18.0239	17.8194	17.1566	17.8742	17.8489	18.1922	0	17.6423	17.7706	17.3776	18.161	18.1299	17.253	17.3646	16.9204
Lumichrome	23.3324	20.5815	20.9881	21.2628	20.2208	21.0852	20.8403	20.5142	21.2432	23.2156	20.7498	22.1206	20.5679	20.7071	20.8971	19.943	20.745	21.2428	20.5864	20.8121	22.0933	21.6452	20.992	21.0524	22.3228	22.3099	22.2288	21.5661	20.6043	22.1672	23.1124	22.0208
Lysine	18.8874	19.1206	18.8044	18.9359	19.1506	18.8826	18.5631	17.7855	18.617	18.4553	0	0	0	0	0	18.1243	18.2346	19.1805	18.4662	18.8497	18.3806	17.805	18.2266	0	0	0	18.0194	18.1902	0	17.736	0	18.6171
Lyso-PC (16:0)	23.9919	23.8395	23.7531	23.6301	23.7021	23.8021	23.6433	23.3854	23.6848	23.4475	23.1031	23.0131	23.2396	23.0419	23.1595	23.1506	23.4206	23.4695	23.0887	22.9357	22.7787	23.0108	23.0561	22.7025	22.8667	22.9279	22.5104	22.303	22.3945	22.2593	22.0598	22.1343
Lyso-PC (17:0)	20.4168	20.3347	19.9959	20.1121	20.1828	20.3108	19.9132	19.6685	19.9004	19.4816	19.5734	19.5717	19.2677	19.4563	18.5954	19.7712	18.8303	18.7514	18.5731	18.6403	18.3218	17.4987	17.8645	16.9497	17.4183	16.9848	16.959	17.8453	15.9285	0	15.6646	16.5558
Lyso-PC (18:0)	24.8158	24.8534	24.6964	24.7419	24.75	24.7499	24.61	24.318	24.6734	24.4007	24.374	24.2495	24.356	24.4191	24.3398	24.3913	24.0571	23.8444	23.8328	23.7126	23.53	23.7467	23.6871	23.3988	23.2992	23.1963	22.991	22.9573	22.9757	22.8172	22.8919	22.8161
Lyso-PC (18:1)	22.7008	22.3917	22.2972	22.2485	22.2554	22.365	22.2189	21.8647	22.2589	21.9659	21.6871	21.6449	21.7425	21.688	21.7074	21.7178	22.5597	22.156	22.2828	22.1997	21.8757	21.9805	22.0475	21.5723	21.5434	21.3088	21.1369	20.9393	21.0507	20.8398	20.9614	20.7228
Lyso-PC (18:2)	16.7646	17.6128	16.5632	15.3741	15.3002	16.1625	17.3058	0	15.7852	15.4489	0	0	0	0	16.7016	0	0	0	15.979	0	0	0	0	0	0	0	0	15.6521	0	0	0	0
Lyso-PE (16:0)	16.9284	16.6781	16.8361	15.838	0	16.524	16.9849	0	17.3436	16.4829	0	0	0	0	17.0452	0	18.2124	16.9606	17.2844	16.5339	17.4313	0	0	16.7386	15.3746	17.4436	16.112	17.4143	16.9966	17.1935	0	15.7398
Lyso-PE (18:0)	20.7625	20.7179	20.642	20.6252	20.595	20.7192	20.5656	20.5093	20.8959	20.5439	20.7907	20.8344	20.5642	20.6993	20.6543	20.6684	20.6039	20.7044	20.5829	20.4841	20.5068	20.7252	20.5541	20.2233	20.466	20.2105	20.3786	20.0739	20.2392	20.1398	20.1039	20.2097
Lyso-PE (18:1)	18.4548	18.644	18.5677	18.6134	18.749	18.8651	19.0123	17.9889	18.7902	19.2472	18.7306	18.6955	18.6335	18.5515	18.6401	18.4058	19.0279	19.0105	19.3469	19.3755	18.1948	18.8607	18.5575	16.9695	18.5934	18.7405	18.4088	17.9542	18.6047	17.6713	17.4515	17.9446
Lyso-PE (20:4)	18.4396	18.0657	18.0909	18.0899	18.0831	18.2977	17.451	17.6884	18.9924	18.212	17.0184	18.3322	17.9872	18.0686	18.4867	18.4217	15.5773	16.9016	17.4512	17.8687	16.4107	15.6063	0	17.0355	17.5475	16.9091	15.8565	17.7788	17.7122	16.5253	18.3198	15.8207
Malate	23.9831	23.9162	23.9185	24.2314	24.0563	24.0543	24.0824	24.4289	23.3858	23.5975	23.8921	23.7755	23.8047	23.7215	23.6987	23.6439	25.236	25.3797	25.2771	25.1635	25.3091	25.2544	25.3836	25.923	25.0963	24.62	24.4611	24.8341	24.6369	24.3447	24.5719	24.356
Malonate	21.0204	20.8083	20.6995	20.4269	20.8953	21.0122	21.4579	21.2243	21.3062	22.032	21.6125	21.0106	21.3066	21.2907	20.8408	21.3717	21.5311	21.4652	20.9186	21.4622	21.5237	21.4793	21.5738	21.9336	22.2873	21.1456	21.0351	21.108	21.3876	21.474	21.6136	21.6087
Maltose	0	0	15.0635	0	0	13.5799	17.4142	14.4418	0	18.0304	0	17.5321	15.6033	0	0	0	0	14.1674	0	16.3178	15.9132	0	19.0207	0	17.2336	0	18.3812	15.0029	16.1368	17.8221	0	15.7373
Methacholine	19.8012	19.7998	19.811	19.7755	19.9621	19.6982	19.6148	19.7944	19.3141	19.2956	19.4625	19.4315	19.2763	19.4426	19.4122	19.1566	0	15.3394	0	0	0	0	0	0	0	0	0	0	0	0	0	0
Methionine	20.2933	20.3551	20.2772	20.3652	20.5598	20.4876	20.3697	20.2134	19.7955	19.7907	19.7869	19.4795	19.2938	19.7279	19.2007	19.7618	19.9086	19.9429	19.8928	19.705	19.7159	19.6681	19.7378	19.6193	18.6187	19.2328	18.9579	19.2967	18.9515	19.6067	19.1311	19.0361
Methyl vanillate	18.5068	19.7483	18.3119	15.3678	17.6853	18.393	19.6344	18.4681	19.6517	19.1909	20.205	18.742	20.1903	19.8337	19.7375	17.41	20.3418	20.6894	18.1408	18.8429	18.3188	19.4657	17.9039	18.9705	19.5327	20.404	19.8333	16.2323	18.3178	18.5718	20.5521	18.9473
Mevalolactone	24.2586	24.1405	24.4447	24.4156	24.5619	24.4817	24.0992	24.2104	24.6638	24.0396	23.9727	24.0759	24.2202	23.9004	23.7965	24.066	23.5687	23.404	23.8067	24.2221	23.8339	24.0074	23.7359	23.7656	24.4886	24.0004	24.3444	24.016	24.0747	23.9323	24.0028	24.1675
Myoinositol	25.9133	25.8601	25.942	26.1171	25.9339	26.0926	26.0291	26.2665	25.9514	25.7448	25.8438	25.7677	25.8013	26.017	25.7711	25.6468	24.0989	24.1095	24.0393	24.0564	24.1082	24.0189	23.9687	24.5249	24.0006	24.1518	23.8986	24.2052	23.9881	23.9159	23.79	23.7918
N,N,N-Trimethyllysine	18.622	18.5141	18.6715	18.8443	18.8275	18.6821	18.6834	19.2812	17.4321	17.3334	0	17.6533	17.1215	17.5243	16.8638	0	17.8099	17.157	18.2695	18.2595	18.6354	16.9386	17.7056	16.897	14.7851	16.0318	16.874	16.4294	16.7614	17.2825	16.6025	17.8303
N,N-Dimethylarginine	19.8399	20.039	20.1494	20.2841	20.0416	20.0872	20.1026	19.9377	18.5244	19.1036	18.694	18.1063	18.9831	18.3544	18.8858	18.1056	20.0199	19.9694	20.0852	19.7285	19.791	19.781	20.1457	19.5864	19.2518	19.3257	18.8128	19.5046	18.7283	19.4616	19.1362	18.9954
N-Acetylaspartate	25.6913	25.5207	25.7388	25.8858	25.9414	25.8427	25.8152	26.0456	24.9414	24.9086	25.0767	25.1515	25.102	25.2834	25.076	25.1923	21.1574	21.4568	21.6838	21.3191	21.0993	21.1069	21.3361	21.734	21.379	21.4696	21.4802	21.4913	21.1536	21.1759	21.3577	21.3071
N-Acetylhexosamine phosphate	19.0141	18.5036	19.0423	19.1664	19.2264	19.1311	19.2026	19.4136	18.3366	18.1165	18.4499	18.1171	18.5036	18.7577	18.6852	18.3734	17.9659	18.2584	18.1339	17.7879	18.5445	18.4186	18.8137	19.1675	16.6565	17.886	17.9196	17.0869	18.027	18.3082	17.8877	17.8075
N-Acetylmethionine	0	0	0	0	0	0	0	0	0	0	0	0	0	0	0	0	17.2472	17.9843	17.9589	17.9075	17.8504	17.8347	18.1317	18.071	16.1735	16.4851	17.9084	16.8524	17.7003	17.8016	17.0638	17.4891
NAD+	22.5286	22.4509	22.508	22.6792	22.7646	22.7592	22.6682	22.858	21.8235	21.9144	22.0474	22.1937	22.1284	22.4384	22.2097	22.2954	21.642	21.8226	21.7359	21.4858	21.6684	21.6734	21.8296	22.0493	21.4114	21.3565	21.4082	21.6936	21.652	21.6646	21.5383	21.6428
NADH	18.0576	17.4939	17.8504	17.7414	17.9928	17.9863	17.9419	18.3756	15.7264	16.0082	15.9957	15.7084	15.3196	16.2311	16.7578	16.682	16.4185	15.8287	15.9618	16.4255	16.2655	14.198	15.893	16.6353	15.2014	14.884	14.4603	14.3295	14.7279	15.8903	15.3279	15.1485
NADP+	18.9337	18.6198	18.3394	18.6988	19.1876	18.4621	18.707	19.0059	16.3978	16.9322	17.5603	16.9496	15.168	15.8766	16.526	16.6716	17.2226	17.0679	18.2562	17.1451	18.4745	17.5467	18.0992	17.3856	17.5808	18.3686	0	16.8589	18.5578	18.3918	18.1647	18.1729
NADPH	16.9001	15.0653	16.9282	17.3316	17.3731	17.8443	17.5252	17.9304	14.5272	15.3666	15.9778	16.7632	16.5811	17.554	16.6242	16.4321	0	0	0	0	0	0	0	0	0	0	0	0	0	0	0	0
N-Formylmethionine	0	0	0	13.4245	14.7351	12.7223	12.4891	0	0	0	0	0	0	0	0	0	13.5412	14.032	13.8457	0	14.6284	0	13.7617	14.8103	14.2167	0	0	13.8052	14.3563	0	13.6046	14.2801
Nicotinamide	22.5418	22.7601	23.0038	22.4784	22.6376	22.9169	22.7319	0	0	0	0	0	0	0	0	0	24.9307	25.5354	25.2696	25.2449	25.1002	25.4346	25.4349	25.6007	24.442	24.2989	24.6003	24.3522	24.9014	24.5191	24.2484	24.7811
N-Undecanoylglycine	24.98	21.725	21.7533	21.7775	20.8219	22.846	23.5087	21.7524	22.6281	25.5337	21.8735	23.0071	22.6835	22.6803	23.145	22.4575	22.4935	22.9424	23.1744	21.2788	22.9846	22.4467	22.4383	23.6756	27.7487	22.996	22.3883	23.4047	24.0098	22.0469	24.8457	23.8298
Oleamide	20.3583	20.5237	20.2927	20.5223	20.3344	20.4228	20.0904	19.5517	20.7174	20.4031	19.5542	20.1995	19.5962	20.4089	20.7007	20.3001	18.5713	18.7293	17.9558	18.0977	18.5538	16.8708	18.3903	0	19.1243	19.4967	19.1425	18.7463	20.0182	19.3547	18.4328	19.3464
Ophthalmate	19.7926	19.6789	19.9095	20.0111	20.1146	20.2795	20.0917	19.9212	18.9391	19.0063	19.0627	19.3663	19.3106	19.5749	19.2309	19.5892	18.3252	18.5207	18.8088	19.0633	18.6755	18.7136	19.1302	18.5827	17.8745	17.1604	16.1011	18.8975	18.763	18.9276	18.4703	18.6451
Ornithine	18.401	19.2894	20.9357	19.4786	18.0853	18.5708	18.3664	17.7575	16.6096	18.3801	17.0578	17.0181	15.3279	15.206	15.2639	16.8658	16.511	17.6473	18.1926	19.1482	18.7652	18.6863	18.9577	17.6746	18.3596	16.9547	17.4632	18.5288	17.8595	19.3323	18.7005	19.994
Oxalate	23.2968	23.2286	23.5064	23.8257	23.7655	23.8353	23.7414	24.0597	23.7624	24.0423	24.1646	24.0728	24.1974	24.3348	24.2337	24.2237	24.2662	24.1989	24.2873	24.3543	24.4305	24.4422	24.6522	24.9442	24.2011	24.2782	24.2281	24.4959	24.3565	24.1659	24.4704	24.4451
Oxohexanoic acid	24.2556	24.1136	24.3243	24.3777	24.5568	24.4179	24.0742	24.1533	24.5979	23.9359	23.9175	24.0616	24.1701	23.6684	23.7905	24.0502	23.127	23.0735	23.5117	24.1721	23.7788	23.948	23.6943	23.7574	24.4743	23.9858	24.0144	23.8302	24.056	23.7482	23.9805	24.1546
Palatinose	0	0	15.0635	0	0	13.5799	17.4142	14.4418	0	18.0304	0	17.5321	15.6033	0	0	0	0	0	0	16.3178	15.9132	0	19.0207	0	17.2336	0	18.3812	15.0029	16.1368	17.8221	0	15.7373
Pantothenate	19.3963	19.6826	19.2423	19.1973	19.5598	19.6482	19.8217	19.1281	19.1111	18.8564	18.9571	19.1397	18.9734	19.0676	19.0675	19.0021	17.8842	18.0049	18.0988	17.8337	17.387	18.2149	17.8378	18.0709	17.0178	0	17.6	17.9435	17.4887	17.413	17.2842	17.7211
PC (32:0)	26.4011	26.2318	26.127	26.1158	26.2429	26.1639	26.0048	25.9359	26.7134	26.381	26.4727	26.4532	26.5081	26.4902	26.4861	26.507	27.8045	27.6861	27.7336	27.7039	27.6215	27.8017	27.7092	27.3726	27.665	27.6505	27.5538	27.6188	27.5305	27.3665	27.5262	27.3463
PC (32:1)	29.0663	29.0451	28.9755	28.9216	28.9675	28.9016	28.7434	28.719	29.1519	28.9386	29.1229	29.0701	29.0544	29.0773	29.0406	29.0475	27.9658	27.8225	27.8833	27.7938	27.7199	27.8975	27.806	27.5438	27.7441	27.7735	27.6698	27.7082	27.6799	27.4836	27.6409	27.5141
PC (32:2)	25.9629	25.9473	25.8868	25.8515	25.8882	25.8403	25.695	25.7397	25.993	25.8644	26.0489	25.9707	25.9966	26.0055	25.9395	25.9848	24.7581	24.6384	24.6626	24.5862	24.5434	24.7518	24.6225	24.4411	24.4038	24.581	24.5306	24.5242	24.4489	24.2454	24.4568	24.3538
PC (34:1)	29.4287	29.3674	29.2575	29.2109	29.2788	29.1807	29.0347	29.0447	29.6063	29.3203	29.465	29.4469	29.4405	29.4448	29.4196	29.4407	30.3954	30.3184	30.3467	30.2681	30.1906	30.3729	30.2958	29.9941	30.1998	30.2078	30.1215	30.1376	30.0853	29.9073	30.0919	29.9386
PC (34:2)	28.4145	28.3849	28.2931	28.278	28.2616	28.2477	28.0764	28.0949	28.467	28.2665	28.4537	28.4139	28.3703	28.4144	28.3899	28.3871	27.979	27.8342	27.9227	27.8206	27.7575	27.9324	27.876	27.629	27.6747	27.7613	27.6877	27.6868	27.6717	27.4854	27.6532	27.5301
PC (36:1)	26.9049	26.7936	26.6708	26.7141	26.7404	26.5968	26.529	26.4755	27.2766	27.0129	27.0851	27.0696	27.0918	27.0298	27.1047	27.0387	27.4717	27.2947	27.3686	27.3212	27.252	27.4261	27.2522	26.9106	27.2432	27.238	27.1182	27.1038	27.0675	26.8506	27.1163	26.9289
PC (36:2)	28.8394	28.7813	28.6848	28.6478	28.6964	28.6281	28.441	28.4541	28.9846	28.6943	28.8687	28.8513	28.8346	28.8128	28.8031	28.8209	29.4314	29.2986	29.3945	29.3077	29.2369	29.4136	29.306	29.0583	29.218	29.2282	29.1526	29.1736	29.1257	28.9236	29.102	28.9884
PC (36:4)	27.0698	27.133	27.055	27.0646	27.0196	27.0146	26.8134	26.9813	27.245	27.0535	27.2302	27.2369	27.1741	27.2267	27.1345	27.2047	27.7536	27.6703	27.7641	27.7083	27.6021	27.7597	27.7066	27.6139	27.4762	27.5678	27.5176	27.5076	27.4915	27.2988	27.488	27.3356
PC (36:5)	25.5739	25.5816	25.4894	25.5316	25.5918	25.5472	25.3545	25.5893	25.6554	25.503	25.6973	25.7489	25.6698	25.7348	25.6958	25.6869	25.7109	25.5929	25.7521	25.6638	25.5189	25.7162	25.6211	25.5974	25.4631	25.4457	25.464	25.5151	25.4646	25.3301	25.496	25.3771
PC (38:4)	27.0515	27.0397	26.9796	26.9119	26.9712	26.8466	26.7274	26.7915	27.1839	26.9633	27.1691	27.102	27.1126	27.1219	27.0486	27.0446	27.4795	27.3443	27.427	27.3739	27.2869	27.4698	27.3849	27.1541	27.1864	27.2143	27.1658	27.1527	27.1287	26.9685	27.1475	27.033
PC (38:5)	27.1276	27.1711	27.1195	27.1166	27.1169	27.0733	26.9328	26.8864	27.2733	27.0751	27.2868	27.2449	27.2292	27.2576	27.1683	27.235	28.2372	28.0546	28.2132	28.1086	28.0575	28.1897	28.116	27.9715	27.8974	27.9877	27.9288	27.9407	27.8808	27.7308	27.9633	27.7436
PC (40:4)	22.5039	22.1433	22.4321	21.8322	22.3128	22.1371	21.9223	21.949	22.4233	22.2681	22.1503	22.1424	22.1924	22.6053	22.0239	22.1168	24.3716	24.1196	24.3374	24.2707	24.145	24.1353	24.2082	24.0816	23.8885	24.109	23.939	24.0311	24.1359	23.8028	23.9709	23.7885
PC (40:5)	24.392	24.4843	24.5359	24.3251	24.3647	24.3321	24.2038	24.2403	24.6517	24.4151	24.5847	24.5436	24.5827	24.5422	24.5353	24.4761	26.0586	25.924	26.0088	25.9143	25.8798	26.0053	25.9011	25.7322	25.7318	25.862	25.8015	25.7542	25.7289	25.5393	25.7917	25.5667
PC (40:6)	25.7802	25.8109	25.7136	25.6584	25.6939	25.6727	25.4784	25.5719	25.801	25.6595	25.8658	25.8234	25.8415	25.8648	25.7359	25.7568	26.3714	26.2786	26.3708	26.2765	26.1562	26.3437	26.3003	26.166	25.9935	26.1078	26.0392	26.0325	25.9884	25.8583	26.0335	25.8553
PC (40:8)	22.7935	23.1163	22.7898	23.1127	23.0165	22.9769	22.9877	23.3183	23.1986	22.8607	23.0545	23.066	23.3528	22.9381	23.1189	23.2277	24.3088	24.1989	24.3153	24.2776	24.0784	24.2372	24.2517	24.3258	23.8607	23.8963	23.9975	24.0444	24.0113	23.6421	23.9014	24.0118
PC (44:8)	0	0	0	0	0	0	0	16.4272	0	17.1801	0	0	0	0	0	0	20.4669	20.411	20.334	20.8626	20.557	20.4809	20.1642	20.2547	18.5613	18.677	20.7423	18.28	20.5144	19.4184	19.6978	19.5912
P-DMEA	23.7724	23.5886	23.8178	23.9756	24.0457	23.9432	23.9277	24.1581	22.99	23.0099	23.1778	23.245	23.1782	23.4711	23.2513	23.3299	22.3518	22.3404	22.3774	22.2714	22.4822	22.3622	22.4814	22.6976	21.9069	21.8361	21.8713	22.2209	22.0264	22.0531	21.9975	22.1399
PE (32:0)	22.7258	22.546	22.5745	22.5887	22.5371	22.3815	22.4973	22.2893	22.7226	22.5512	22.8358	22.8106	22.636	22.709	22.7196	22.6602	20.2996	20.013	20.7558	20.5597	19.7855	20.5324	19.4632	19.5467	19.9685	19.8758	20.7087	20.5674	18.9595	19.8794	20.0097	20.7046
PE (34:1)	25.3054	25.2791	25.2349	25.2463	25.2562	25.2249	25.0346	25.218	25.7342	25.4703	25.6403	25.6128	25.6044	25.6135	25.5891	25.6623	25.673	25.5898	25.6887	25.6436	25.6114	25.7272	25.6847	25.6188	25.7065	25.7618	25.6977	25.7124	25.6897	25.4824	25.6292	25.5685
PE (34:2)	23.1814	23.117	23.0382	23.1631	23.014	23.042	22.8822	23.1238	23.5041	23.2029	23.4939	23.3751	23.4003	23.3354	23.3967	23.517	22.8111	22.5999	22.8444	22.6959	22.6479	22.7956	22.8469	22.645	22.7619	22.7222	22.8368	22.7994	22.7203	22.6844	22.8068	22.602
PE (36:1)	26.9276	26.8721	26.8448	26.7607	26.8492	26.8003	26.6531	26.7311	27.4362	27.139	27.2818	27.277	27.2662	27.2602	27.3152	27.3177	27.2237	27.1381	27.2333	27.1625	27.1298	27.2485	27.1773	27.0109	27.3221	27.2847	27.185	27.2798	27.1719	26.9982	27.2058	27.0305
PE (36:2)	25.6336	25.5727	25.5622	25.5541	25.5794	25.5674	25.4251	25.6498	26.0386	25.7677	26.0409	25.9871	25.9753	25.987	25.9978	25.9963	26.1683	26.101	26.1909	26.1208	26.0514	26.2306	26.1812	26.1505	26.1809	26.3123	26.1706	26.2378	26.2044	26.003	26.154	26.0525
PE (36:3)	23.2478	23.1712	23.1721	23.032	23.0354	23.3108	23.1413	23.3964	23.5951	23.1132	23.5684	23.5129	23.693	23.3041	23.6587	23.4002	23.5226	23.3401	23.6163	23.4668	23.5534	23.703	23.3768	23.3555	23.4298	23.5807	23.3275	23.5883	23.4144	23.2637	23.6182	23.5067
PE (38:1)	24.9837	24.7796	24.7429	24.716	24.7884	24.7771	24.5382	24.6258	25.2398	24.9479	25.1324	24.9942	25.0313	25.0181	24.9894	25.0157	25.9601	25.878	25.8679	25.8359	25.7449	25.9505	25.7791	25.5665	25.7609	25.8241	25.7484	25.7419	25.6246	25.4777	25.6934	25.4952
PE (38:3)	24.672	24.6983	24.5833	24.726	24.6248	24.6404	24.4409	24.7355	25.1871	25.018	25.1698	25.0745	25.2129	25.1578	25.1774	25.2328	24.3941	24.3909	24.3595	24.4492	24.3181	24.5702	24.5521	24.3911	24.3395	24.6274	24.2569	24.533	24.4201	24.2835	24.497	24.3715
PE (38:4)	26.0735	26.0662	25.9792	26.0263	26.0936	26.0583	25.9206	26.2308	26.65	26.43	26.5766	26.5621	26.5696	26.5321	26.5737	26.6094	27.2842	27.2472	27.3471	27.3148	27.2842	27.4071	27.3479	27.3591	27.3436	27.4143	27.3437	27.4404	27.3419	27.2065	27.4108	27.2429
PE (38:5)	24.5043	24.5941	24.463	24.6759	24.5546	24.5327	24.3823	24.7685	24.9376	24.7947	25.0532	24.9651	24.9887	24.9915	24.8977	25.0068	25.92	25.8495	25.9057	25.8648	25.885	25.9028	25.932	25.9529	25.7929	25.9494	25.8608	25.9604	25.8942	25.7656	25.9025	25.7508
PE (38:6)	22.4549	22.6043	22.16	22.5685	22.3263	22.3394	22.2736	22.8304	22.6754	22.3103	22.6996	22.792	22.6647	22.5379	22.4703	22.2082	24.1895	24.1454	24.2114	24.1122	24.1471	24.1786	24.22	24.1953	24.0774	24.2139	24.0968	24.2424	24.1128	23.9519	24.2636	24.0095
PE (40:5)	24.1923	24.329	24.1328	24.3496	24.3221	24.2896	24.0573	24.4257	24.7533	24.4635	24.7251	24.7359	24.7655	24.636	24.6575	24.7518	25.5149	25.3667	25.519	25.5051	25.4696	25.6049	25.5539	25.4854	25.4325	25.5738	25.3896	25.5185	25.4595	25.2535	25.4341	25.361
PE (40:7)	22.8657	22.8468	22.6665	23.0232	22.8909	23.078	22.8041	23.3084	23.5661	23.023	23.3134	23.392	23.2245	23.1621	23.279	23.2864	24.7638	24.7104	24.7666	24.7967	24.7064	24.8974	24.3245	24.998	24.6618	24.8188	24.8148	24.9002	24.8094	24.6206	24.8913	24.7081
Pentoses	13.7387	16.0058	14.6237	13.7691	15.8237	14.1185	15.9898	17.0481	15.4515	15.3091	15.0653	14.7757	13.9355	15.3927	15.93	15.709	15.0511	0	14.8286	0	14.1835	14.3545	15.5073	16.6301	15.6398	14.7247	15.9506	15.1006	14.1054	15.3623	0	16.6808
Phenylalanine	22.2204	22.0617	22.503	22.22	22.2443	22.2457	22.2026	22.162	22.2864	22.3403	21.7328	21.802	21.8931	21.9306	22.0209	21.8096	21.2235	21.3228	21.5199	20.9936	21.8531	21.3474	21.2504	21.5134	20.4369	21.2327	20.8	21.013	21.0352	20.9579	20.9732	21.3277
Phosphoenolpyruvate	0	0	0	0	14.1614	0	0	0	0	0	0	0	0	0	0	13.4015	0	0	13.8196	13.2432	13.2879	13.5694	0	15.9918	0	0	0	0	0	0	0	0
Phosphoethanolamine	23.6561	23.3849	23.6533	23.8961	23.8655	23.9326	23.8968	24.0907	23.0874	22.932	23.2029	23.1702	23.1389	23.4605	23.3074	23.3664	19.5446	19.5923	19.4526	19.443	18.9954	19.3774	19.3008	20.1522	19.281	18.3028	18.1223	19.2439	19.569	19.1276	19.6052	18.458
Phosphorylcholine	29.4948	29.3176	29.5178	29.6148	29.7479	29.6123	29.5568	29.4756	28.3107	28.5563	28.7279	28.8896	28.7785	28.9909	28.8475	28.9671	27.9035	28.0777	28.1768	27.8862	28.0443	27.9818	28.1054	27.8769	27.4154	27.4787	27.5193	27.6916	27.7575	27.6507	27.5392	27.7381
Phosphoserine	18.4434	17.4837	18.0168	18.501	18.8966	18.6713	18.5926	17.5097	0	0	0	0	0	0	0	0	17.71	17.8192	17.6185	16.9722	18.213	16.7276	18.6049	17.4574	0	15.6673	15.9753	0	15.4279	17.3777	15.4845	16.3401
PI (32:0)	19.3504	19.3994	18.3727	19.2821	18.2057	18.7294	18.5688	18.5266	19.6501	19.352	19.5478	19.2613	19.3696	19.6077	19.4633	19.4879	19.2319	19.8252	19.5342	19.2218	19.186	19.3387	19.1691	18.7357	18.7051	19.6969	19.9018	19.5297	19.5568	19.6773	19.36	19.2965
Platelet-activating factor	24.8158	24.8534	24.6964	24.7419	24.75	24.7499	24.61	24.318	24.6734	24.4007	24.374	24.2495	24.356	24.4191	24.3398	24.3913	24.0571	23.8444	23.8328	23.7126	23.53	23.7467	23.6871	23.3988	23.2992	23.1963	22.991	22.9573	22.9757	22.8172	22.8919	22.8161
Proline	25.9109	25.9151	26.0056	26.295	26.1331	26.149	26.1137	25.7746	25.5375	25.4613	25.7233	25.6723	25.6489	25.7178	25.6235	25.7775	25.7233	25.839	25.8906	25.8281	25.802	25.7116	25.7845	25.4058	25.6102	25.5814	25.7691	25.7778	25.7327	25.8362	25.7064	25.5216
PS (34:2)	21.0431	20.8271	20.6661	20.7127	20.8815	20.5977	20.6031	19.9357	20.8642	20.913	20.851	20.6519	20.4334	21.0173	20.5033	20.693	19.8805	19.7529	19.1592	19.6695	19.3981	19.2288	19.1774	18.9541	18.4692	19.2255	19.3737	18.4537	19.4449	18.3262	18.6846	18.8126
PS (36:1)	26.4481	26.4284	26.3369	26.3353	26.4367	26.249	26.0995	26.1273	27.0369	26.8729	26.9273	26.9438	27.0128	26.8968	26.988	27.0522	26.328	26.288	26.2757	26.3035	26.1518	26.3589	26.2861	26.0221	26.4062	26.4999	26.3125	26.5042	26.3243	26.1699	26.3692	26.1671
PS (36:4)	18.5628	18.5361	17.9178	18.4372	18.4944	18.1371	18.1337	17.943	19.0838	18.256	18.0025	16.9807	18.8369	18.2723	18.6275	18.5148	19.529	19.5964	19.3352	19.1833	18.7479	19.6711	19.496	19.4822	19.0757	19.7996	19.0754	19.2459	19.3959	19.2766	18.1832	19.6765
PS (38:3)	24.0332	24.0421	23.8436	23.9546	24.0378	23.8916	23.6692	23.6728	24.3993	24.2433	24.2508	24.314	24.4201	24.4316	24.3803	24.4516	22.8184	22.6694	22.7219	22.7977	22.62	22.8297	22.6435	22.2862	22.6121	22.7862	22.5816	22.7742	22.5883	22.4265	22.6875	22.5554
PS (38:5)	20.3539	20.6248	20.2198	20.1412	20.5991	19.9723	20.1447	19.3562	20.7329	20.1368	20.2736	20.6051	20.1405	19.9753	20.4	20.2197	20.9538	20.7474	20.9676	20.7055	20.7103	20.881	20.795	20.3701	20.4545	20.7021	20.7051	20.6851	20.71	20.4499	20.0378	20.3384
PS (38:6)	17.915	16.9151	17.2384	16.678	16.5279	0	16.3719	17.2219	16.2283	17.247	0	17.5868	16.4979	0	0	17.6038	17.755	17.7791	18.3689	18.7182	16.8168	16.3522	17.352	15.7815	0	0	0	18.7646	15.5779	15.8485	18.1956	17.6003
PS (40:5)	24.0409	24.0253	23.913	23.9294	24.0495	23.882	23.7369	23.7589	24.3917	24.2311	24.3274	24.2442	24.3702	24.3529	24.2598	24.366	23.6674	23.6529	23.7324	23.6502	23.474	23.6495	23.6313	23.2949	23.4924	23.7092	23.4569	23.6262	23.4833	23.2577	23.4973	23.3572
PS (40:6)	24.3456	24.438	24.2618	24.2946	24.3338	24.2164	24.051	24.1051	24.6155	24.3859	24.4821	24.5594	24.4972	24.5788	24.5385	24.6271	23.6296	23.6574	23.7102	23.7042	23.4556	23.7572	23.6905	23.4099	23.4943	23.6428	23.4952	23.6429	23.4852	23.3517	23.4493	23.3732
PS (40:7)	19.058	19.6224	19.0665	19.3892	19.114	18.9796	18.7504	18.6045	19.6552	18.021	18.4436	19.5498	18.9084	17.9342	18.8433	18.6864	20.1781	19.2747	19.3845	19.2975	19.4983	19.8446	18.7324	18.5327	19.283	19.1319	19.2075	18.9223	19.5257	19.1677	18.4772	18.6521
Pyridoxine	0	0	0	0	0	0	0	0	0	0	0	0	0	0	0	0	19.4792	18.8262	19.6177	19.0151	18.6462	19.4224	18.9111	18.3726	0	0	17.6939	17.3215	16.2031	0	0	0
Quinolinate	14.8344	14.9811	15.8604	15.2243	0	14.9522	15.7215	17.0717	0	0	0	16.5319	0	0	15.884	0	16.182	15.9385	15.8728	16.4293	15.8001	0	0	17.7589	0	16.4197	16.2151	16.7236	16.7578	15.6904	16.8475	16.2881
Resorcinol monoacetate	20.9296	22.2614	21.0442	21.2682	21.1545	21.3852	21.9064	20.8984	22.2029	22.5382	22.8039	21.9975	22.6692	22.6976	22.4981	22.2237	22.545	22.6383	22.0315	22.3006	21.7349	22.1217	22.0081	22.0264	22.6872	22.9089	22.2008	22.2424	21.988	22.1517	22.8479	22.4564
Ribulose/Ribose/Xylulose 5-phosphate	14.8075	14.7084	13.3442	0	13.1978	0	0	0	0	0	16.0378	0	15.0015	14.4199	14.6005	14.8903	15.7447	0	15.6131	0	0	0	0	0	0	0	0	0	0	15.4457	14.9348	15.1957
S-Adenosylhomocysteine	16.7404	16.9194	0	0	15.404	17.5358	17.6256	0	0	0	0	0	0	0	0	0	0	0	0	0	0	0	17.0819	0	0	0	0	0	0	0	0	0
S-Adenosylmethionine	23.9037	23.6069	23.7953	23.8602	24.0719	23.9827	23.9581	23.5532	22.4148	22.669	22.7245	22.8996	22.6523	23.0399	22.9183	22.995	23.6084	23.5332	23.8528	23.364	23.6793	23.5621	23.8134	23.4138	23.0358	23.064	22.9992	23.2191	23.277	23.4126	23.0832	23.2885
Salicylate	22.3516	21.9187	22.5318	22.2112	21.9161	22.0231	22.133	22.5734	22.7672	22.7431	22.4345	23.1084	22.7091	23.0273	22.8666	23.2962	22.7418	22.2888	23.0411	23.1037	23.0516	23.4455	23.4508	23.0595	23.5082	22.7364	23.633	23.1645	23.2881	23.4112	23.1025	23.5843
Sedoheptulose 7-phosphate	18.0128	16.7698	18.0163	15.3148	17.602	17.326	15.2539	17.7095	0	0	16.1126	0	0	0	0	0	0	0	16.4627	15.5146	0	0	0	15.8376	0	0	16.6436	0	0	0	16.5857	0
Serine	21.0643	21.2689	21.6458	21.4142	21.2785	21.2206	21.3869	21.0577	20.1018	20.4743	20.0274	20.4644	20.1193	20.1391	19.7394	20.1868	21.2037	21.3545	21.4607	21.0358	21.3765	21.3926	21.2776	21.4122	20.5638	20.8168	20.8416	20.8721	20.8925	20.9013	21.0704	20.9068
SM (d18:1/14:0)	24.1039	24.0204	23.8752	23.8695	23.9301	23.8493	23.6748	23.5364	24.0575	23.8965	23.9584	23.9138	23.982	23.9889	23.8683	23.9267	23.0279	22.6814	22.8298	22.7932	22.7174	22.7028	22.691	22.2966	22.4725	22.576	22.4423	22.578	22.4545	22.1363	22.5068	22.2636
SM (d18:1/16:0)	28.7182	28.6376	28.5204	28.464	28.5546	28.4451	28.2935	28.2278	28.809	28.6473	28.7181	28.6963	28.7038	28.7244	28.7302	28.7467	26.8443	26.8102	26.8245	26.7781	26.6605	26.8007	26.7308	26.3745	26.6637	26.7241	26.6125	26.6501	26.619	26.382	26.5763	26.4435
SM (d18:1/18:0)	24.3779	24.1645	24.0381	24.0535	24.1784	23.9509	23.9302	23.8465	24.5847	24.4034	24.4981	24.5185	24.5121	24.3577	24.6239	24.494	21.7977	21.7007	21.7728	21.6211	21.482	21.6316	21.6254	20.9636	21.5886	21.1424	21.4346	21.5135	21.168	20.8979	20.9215	20.8573
SM (d18:1/18:1)	21.3625	21.271	21.2141	21.2751	21.1495	21.2925	20.932	21.0655	21.1129	20.7616	20.615	21.1824	21.2589	21.0774	20.9112	20.5885	20.624	20.1447	20.8933	20.738	20.3417	20.6656	20.2378	19.7838	20.5253	20.1048	19.8914	19.8849	19.9417	18.5402	19.6229	19.7436
SM (d18:1/22:0)	23.4506	23.2477	23.2439	23.1308	23.2584	23.3685	23.0502	23.2341	24.2821	23.8956	24.0557	24.0035	24.0598	23.9102	24.1273	24.1514	18.1843	16.657	0	0	16.6115	17.4209	15.9487	0	15.3739	16.2053	16.5605	18.0414	17.6099	15.9631	16.4929	0
S-Methylthioadenosine	18.7045	19.2251	19.0128	19.1347	19.4887	18.8957	18.7723	17.6308	15.989	16.8694	17.564	17.822	17.4451	16.4218	18.0059	17.6813	18.2494	16.6624	18.373	17.475	18.3261	19.3088	18.6571	16.6468	17.0346	17.6519	18.4058	17.5144	18.2104	18.6637	17.9821	18.4529
Sphinganine	22.5384	22.419	22.4636	22.426	22.5207	22.594	22.4242	22.5263	23.4302	23.3899	23.4653	23.4055	23.4362	23.4401	23.4043	23.3632	23.2055	23.29	23.2334	23.2388	23.2296	23.3223	23.2387	22.9972	23.4278	23.6398	23.5342	23.597	23.5174	23.4047	23.4458	23.3604
Suberate	0	0	19.5643	0	0	19.4101	19.4019	20.1942	0	23.0964	20.1245	20.6274	20.2037	0	20.3323	19.9531	19.9106	0	19.8171	20.4168	19.9585	20.7883	20.6264	21.341	0	0	20.9487	0	20.3325	20.4636	20.8299	20.4991
Succinate	20.7046	20.9118	21.7506	21.3646	21.2514	21.1553	21.7098	21.1756	21.412	22.0964	22.1113	21.7235	21.3425	21.1119	21.2404	22.1353	21.2584	22.6533	21.9428	21.7179	22.5057	21.7813	21.602	21.9594	22.2617	22.9497	22.3225	21.2843	21.8293	21.8392	21.4646	22.0252
Sulfolactate	22.7112	19.5261	22.2834	20.6688	21.5448	22.0989	20.1094	22.2036	22.8044	22.3725	22.2231	22.9924	22.6553	21.848	20.3766	22.5526	20.6033	20.4479	22.7402	22.5437	22.8887	23.5902	21.1875	21.7439	22.8026	22.4283	22.2488	21.7528	22.2938	24.0153	22.3182	23.6917
Taurine	24.2787	24.2888	24.2927	24.4478	24.4701	24.4376	24.3384	24.3728	23.9348	23.8903	23.9196	23.8845	23.964	24.0408	23.9938	23.9748	24.8992	25.0006	24.9055	24.8756	24.9226	24.8919	24.9688	25.0331	24.6256	24.8611	24.8353	24.9002	24.7926	24.7934	24.7987	24.7214
Theanine	14.9405	16.5318	0	16.2331	15.7443	0	16.0163	0	0	0	16.0764	15.8914	0	16.8186	0	0	0	0	0	0	16.446	0	16.3878	0	0	0	0	0	0	0	16.7458	0
Thiamine	0	0	0	0	0	0	0	0	15.0391	0	0	0	0	0	0	0	0	0	0	0	0	0	0	0	16.2052	0	0	0	0	0	0	0
Thiamine monophosphate	14.378	0	0	0	0	0	14.4958	14.8839	0	0	0	15.0107	0	0	0	0	0	0	0	14.9213	0	0	0	0	0	0	0	0	0	0	0	0
trans-4-Hydroxyproline	24.2565	24.7158	24.557	24.6252	24.5694	24.5488	24.4005	25.996	24.1741	24.2591	24.437	24.3382	24.2848	24.4052	24.395	24.3953	24.1099	24.5591	24.2027	24.4576	24.2767	24.5024	24.392	26.2126	24.4227	24.5851	24.4836	24.6332	24.5122	24.1695	24.5285	24.4447
trans-Aconitate	20.0564	19.805	20.2159	20.2078	20.2972	20.2315	20.2731	20.3548	19.6975	19.7364	19.4821	19.5539	19.5124	19.8379	19.8119	19.8826	18.4217	18.6738	18.5566	18.0377	18.6474	18.5038	18.552	18.7429	18.2449	17.1078	17.8368	17.4176	17.6361	17.9749	17.6575	18.1902
Trigonelline	19.341	19.4379	19.0466	19.7583	19.7913	19.523	18.9057	19.551	0	0	19.2165	19.182	19.4287	0	0	19.3931	21.0459	20.9958	21.0955	20.5668	20.7729	20.4696	20.5965	21.2642	20.4531	20.5296	20.2966	20.5428	20.2577	20.5631	20.3415	20.4759
Tryptophan	18.7301	18.793	18.8217	18.5368	18.4055	18.4421	18.5401	18.2933	18.5238	18.6559	18.1161	17.4962	18.0008	18.1805	17.7518	18.2153	15.7633	0	0	0	0	0	0	0	0	0	0	0	0	0	0	0
Tyrosine	20.0621	20.3485	20.2365	20.2885	20.4633	20.3871	20.2002	20.0808	19.6505	19.8206	19.676	19.8142	19.7278	19.9087	20.0683	19.8363	17.0054	17.8937	17.2335	17.4521	18.2754	17.9489	18.4658	16.9058	17.2653	16.8823	17.6445	17.5628	16.2048	16.8846	16.9073	18.6092
UDP-glucose	23.0204	22.928	23.1246	23.2697	23.2853	23.2954	23.2557	23.8076	22.3105	22.4254	22.7147	22.6618	22.6868	22.9563	22.7762	22.8585	24.5886	24.7146	24.6382	24.4509	24.6387	24.5865	24.7224	25.2149	23.8331	23.9874	23.9802	24.154	24.1759	24.1249	24.154	24.1248
UDP-N-acetylglucosamine	21.4225	21.1192	21.4864	21.5045	21.5444	21.6434	21.4804	21.9366	20.866	20.5471	21.0033	20.9018	20.9952	21.2354	20.9067	20.9198	22.924	22.9796	22.9702	22.75	22.9808	22.8634	23.0558	23.4862	22.3133	22.4614	22.4941	22.6193	22.5619	22.5387	22.4915	22.5383
Ureidosuccinate	13.8985	0	0	15.7218	14.4441	0	13.5013	16.104	0	0	0	14.2459	0	0	0	0	0	16.8629	16.0732	13.7316	15.7014	14.0266	15.1839	0	0	14.7711	14.5503	0	14.4947	0	0	0
Uridine	0	0	14.8651	0	0	15.5835	14.4404	0	0	0	0	15.3601	16.5704	0	16.8289	16.6659	0	15.6245	0	0	0	16.1528	0	0	15.3259	0	0	0	0	15.6181	0	15.2942
Uridine diphosphate	19.5253	19.1038	19.713	19.8492	20.0537	19.8419	19.8112	20.373	19.3089	19.3279	19.6801	19.8611	19.7542	20.2671	20.027	19.9824	19.6628	19.791	19.9697	19.4848	19.8473	19.6997	20.0124	20.4052	20.2748	20.5703	20.6655	20.7486	20.6296	20.6289	20.5114	20.8318
Uridine monophosphate	16.1654	15.4891	16.3138	17.1196	17.3741	16.9202	16.4948	17.314	17.4201	17.6245	17.2913	17.8109	17.7505	18.0648	17.9931	17.8912	16.5304	17.1447	17.3084	17.3717	16.7944	17.2659	17.0244	17.7117	18.3971	18.7168	18.4047	18.6633	18.2138	18.4676	17.5817	17.9522
Urocanate	17.6114	21.3697	23.6991	21.2619	0	19.7203	17.8387	17.8542	19.3503	21.7309	0	19.339	18.2907	0	18.5706	19.807	18.5785	19.5452	18.8758	20.9796	20.5832	19.8186	19.8415	21.2051	18.2521	19.5679	20.538	19.8208	20.8705	21.755	20.0191	21.9744
Val-Lys	21.0746	20.8479	21.1566	21.164	21.2151	21.1619	21.2865	21.2255	19.988	20.2502	20.35	20.3674	20.4938	20.6487	20.5927	20.4867	20.11	20.3212	20.7383	20.3065	20.4757	19.9445	20.5448	20.1265	19.7779	19.7273	20.0471	19.9911	20.058	20.0472	20.3024	19.6118
Xanthine	0	15.2542	17.2628	15.1277	13.2977	15.3439	16.5809	15.0284	0	16.1554	0	15.0164	15.5974	0	16.239	17.053	0	16.1698	0	0	15.9654	16.49	16.452	16.2881	0	0	0	0	14.7224	16.2872	0	16.3596

## Sheet: 1I
Metabolites significantly different between pipetted AML and ALL cells, and between sorted AML and ALL cells. These were used to make the Venn diagram in figure 1I
Pipetted				Sorted
Metabolite	FC (ALL/AML)	FDR		Metabolite	FC (ALL/AML)	FDR
SM (d18:1/22:0)	0.00654659	4.5801e-12		Fructose 6-phosphate	0.00321169	6.70865e-20
Fructose 6-phosphate	0.00677	1.41524e-18		Galactose 1-phosphate	0.00321169	6.70865e-20
Galactose 1-phosphate	0.00677	1.41524e-18		SM (d18:1/22:0)	0.00470009	1.40457e-12
Carnitine (14:0)	0.0148284	2.76074e-14		Carnitine (18:1)	0.0181479	1.64515e-13
Carnitine (18:1)	0.0177693	1.37346e-13		Carnitine (14:0)	0.0269967	3.77664e-13
Carnitine (16:1)	0.0224251	5.26054e-12		3-Hydroxycarnitine (6:0)	0.030021	3.02756e-21
Methacholine	0.0250723	7.63822e-22		Methacholine	0.031044	3.01042e-21
3-Hydroxycarnitine (6:0)	0.0305535	2.6534e-21		Carnitine (18:0)	0.0327096	6.3352e-15
Acetylcarnitine	0.0328623	9.79596e-22		Acetylcarnitine	0.037187	3.01042e-21
N-Acetylaspartate	0.0457998	7.63822e-22		Phosphoethanolamine	0.0527574	1.23753e-15
Phosphoethanolamine	0.0502506	1.05046e-15		Indole-3-acrylate	0.0544633	6.43769e-14
2-Quinolinecarboxylate	0.0515913	2.76072e-13		Carnitine (3:0)	0.0623966	9.47982e-15
4-Quinolinecarboxylate	0.0515913	2.76072e-13		Carnitinamide	0.0689472	1.09943e-12
Indole-3-acrylate	0.0578131	8.86292e-14		N-Acetylaspartate	0.0748582	1.07802e-20
Hypoxanthine	0.0685629	8.01935e-09		Tryptophan	0.0977823	7.08311e-17
Carnitine (18:0)	0.0688758	4.72461e-13		SM (d18:1/18:0)	0.100931	7.57118e-20
Tryptophan	0.0779102	1.27031e-17		2-Quinolinecarboxylate	0.125731	1.92744e-10
Inosine monophosphate	0.0819666	8.86748e-08		4-Quinolinecarboxylate	0.125731	1.92744e-10
NADPH	0.0833296	1.32316e-10		Lyso-PC (17:0)	0.129444	1.60764e-09
Carnitinamide	0.0866481	5.27829e-12		Carnitine (16:1)	0.136342	3.49183e-07
Carnitine (3:0)	0.0924773	1.33435e-13		NADPH	0.153785	1.86351e-08
Tyrosine	0.163708	6.22177e-09		PE (32:0)	0.162503	5.46614e-12
SM (d18:1/18:0)	0.177622	1.61417e-17		Tyrosine	0.16867	8.52499e-09
CMP-2-aminoethylphosphonate	0.18238	0.000311937		Carnitine (16:0)	0.225335	5.52384e-14
3-Hydroxycarnitine (14:0)	0.183353	2.95971e-08		SM (d18:1/16:0)	0.227183	3.87768e-20
PE (32:0)	0.189719	2.56659e-11		Guanosine monophosphate	0.227534	0.00141733
Oleamide	0.191837	2.90769e-07		Glyceraldehyde 3-phosphate	0.233484	6.35288e-07
3-Hydroxycarnitine (4:0)	0.210395	4.67059e-10		Creatine	0.246036	7.90791e-13
3-Hydroxycarnitine (16:0)	0.229896	2.97911e-06		trans-Aconitate	0.262227	3.10849e-13
Sedoheptulose 7-phosphate	0.230827	0.000100382		PS (34:2)	0.26942	2.839e-10
Carnitine (5:0)	0.234719	1.61417e-17		Myoinositol	0.277348	9.90641e-16
Glyceraldehyde 3-phosphate	0.243635	9.61571e-07		PS (38:3)	0.300427	2.28805e-16
Creatine	0.244144	6.95071e-13		Pantothenate	0.305423	2.01191e-08
NADH	0.25407	9.36729e-07		Glucose 6-phosphate	0.314463	0.00017834
Carnitine (16:0)	0.257943	2.76072e-13		2-/3-Phosphoglycerate	0.322342	0.00619444
Lyso-PC (17:0)	0.260955	1.29775e-06		Carnitine (12:0)	0.339018	0.0138578
2-/3-Phosphoglycerate	0.262025	0.00142659		PC (32:2)	0.345711	1.20492e-18
Myoinositol	0.267249	6.60617e-16		SM (d18:1/14:0)	0.348615	4.69976e-16
SM (d18:1/16:0)	0.296335	1.62906e-18		Carnitine	0.355368	2.79664e-13
Carnitine	0.30503	2.6422e-14		Inosine monophosphate	0.357111	0.00424323
alpha-Ketoglutarate	0.307791	0.00581039		PC (32:1)	0.376012	2.10218e-18
trans-Aconitate	0.315731	4.5801e-12		Lyso-PC (18:0)	0.376991	1.35872e-16
Lyso-PC (18:2)	0.315811	0.000657239		Platelet-activating factor	0.376991	1.35872e-16
3-Hydroxycarnitine (5:0)	0.319009	1.10716e-05		Carnitine (5:0)	0.404485	8.43688e-14
Cystathionine	0.324965	4.84916e-07		P-DMEA	0.435234	7.73584e-16
Lyso-PE (20:4)	0.330517	0.00176984		Phosphorylcholine	0.447582	3.10849e-13
Allantoin	0.338352	0.000148761		SM (d18:1/18:1)	0.448553	4.35662e-06
Pantothenate	0.343169	1.00608e-07		Ophthalmate	0.449048	0.00017449
Phosphorylcholine	0.344927	2.02739e-15		Carnitine (17:0)	0.453263	0.0130716
Glucose 6-phosphate	0.347937	0.000424586		Lyso-PE (20:4)	0.456546	0.0224767
Carnitine (12:0)	0.351667	0.015167		3-Hydroxycarnitine (4:0)	0.470286	3.39834e-05
P-DMEA	0.357725	1.61417e-17		NADH	0.480486	0.0016788
Glu-Glu	0.39515	0.000615359		PS (40:6)	0.485073	7.41191e-14
PS (34:2)	0.418759	2.6202e-07		Oleamide	0.490633	0.00531202
Ophthalmate	0.421212	6.57823e-05		Carnitine (4:0)	0.49709	0.00161797
PC (32:2)	0.427516	7.61155e-17		Phenylalanine	0.498308	1.09505e-07
PS (38:3)	0.42935	1.14682e-13		Alanine	2.00663	1.22782e-07
S-Adenosylhomocysteine	0.438026	0.0105704		PC (32:0)	2.04306	4.21855e-15
SM (d18:1/14:0)	0.453782	7.74717e-14		Glutathione	2.19326	1.40809e-14
PC (32:1)	0.462196	1.72007e-16		PC (40:5)	2.26668	4.76986e-17
NADP+	0.468273	0.0467916		Phosphoserine	2.31846	0.00283871
Dethiobiotin	2.03958	0.0151882		UDP-glucose	2.62633	7.67611e-14
PC (34:1)	2.06669	1.60413e-15		PE (40:7)	2.82315	1.79366e-13
PC (38:5)	2.07128	2.50991e-16		PE (38:6)	2.98193	1.49451e-13
PE (38:1)	2.11243	1.33001e-15		UDP-N-acetylglucosamine	2.99049	2.43176e-14
PS (36:4)	2.15828	0.000150921		Glutathione disulfide	3.02274	4.4635e-13
Alanine	2.17206	2.07446e-08		N-Formylmethionine	3.036	0.0102907
Glycerophosphocholine	2.22675	7.91792e-14		Glycerophosphocholine	3.09001	1.77871e-16
PC (40:8)	2.35423	8.31286e-14		Quinolinate	3.18053	0.00764111
PE (40:5)	2.36219	1.56223e-15		Acetylaminoadipate	3.24483	3.61663e-13
PE (38:4)	2.40807	8.44839e-18		Cytidine diphosphate	3.25391	8.62672e-05
Malate	2.43162	5.06822e-10		PC (40:4)	3.28959	1.14498e-14
PE (38:5)	2.53534	1.61417e-17		Hypotaurine	3.40282	2.9407e-17
5,6 Dimethylbenzimidazole	2.54153	0.00399121		Trigonelline	3.54837	4.19309e-08
Hypotaurine	2.63386	1.72018e-15		Ornithine	3.81829	0.00314308
Trigonelline	2.69739	1.65791e-06		Aspartate	3.89368	5.63625e-20
UDP-glucose	2.72451	4.14771e-14		N-Acetylmethionine	4.03013	1.71678e-10
UDP-N-acetylglucosamine	2.7974	7.74717e-14		Glycerophosphoethanolamine	4.39535	5.63506e-21
Glutathione	2.81257	9.75651e-17		Cys-Gly	4.97632	3.87556e-06
PC (32:0)	2.88037	3.87013e-18		Nicotinamide	8.22192	3.55879e-14
PC (40:5)	2.96544	3.36492e-19		PC (44:8)	13.8229	2.0947e-10
Acetylaminoadipate	2.99183	1.28413e-12		ADP-ribose	14.4107	2.92316e-10
Aspartate	3.01546	3.0901e-18		Adenosine diphosphate ribose	16.9435	8.40854e-11
PE (38:6)	3.31783	2.94275e-14		Argininosuccinate	23.3186	6.25359e-16
Glutathione disulfide	3.40828	7.74717e-14		Glycerol 3-phosphate	55.0426	5.60658e-16
Glycerophosphoethanolamine	3.4344	2.09134e-19
PE (40:7)	3.5065	6.42621e-15
PC (40:4)	4.15432	4.70107e-16
Cys-Gly	5.37951	1.86538e-06
N-Acetylmethionine	6.49693	7.55264e-13
Nicotinamide	6.72831	1.925e-13
Pyridoxine	14.2535	1.4485e-11
PC (44:8)	29.6346	2.00852e-12
beta-Glycerophosphate	30.1917	1.0793e-14
Glycerol 3-phosphate	30.1917	1.0793e-14
ADP-ribose	80.9724	4.04735e-14
Adenosine diphosphate ribose	89.5227	2.12538e-14

## Sheet: 1J
Correlation of Log2 fold changes for all metabolites detected between sorted AML and T-ALL cells, and pipetted AML and T-ALL cells.
Metabolite	Sorted Log2 Fold Change	Pipetted Log2 Fold Change
Methacholine	-5.00954	-5.31776				Sorted Log2 Fold Change vs. Pipetted Log2 Fold Change
N-Acetylaspartate	-3.7397	-4.44851			Spearman r
Acetylcarnitine	-4.74906	-4.92742			r	0.8143
3-Hydroxycarnitine (6:0)	-5.05788	-5.03252			95% confidence interval	0.7659 to 0.8535
Glycerophosphoethanolamine	2.13598	1.78006
PC (40:5)	1.18058	1.56825			P value
Fructose 6-phosphate	-8.28245	-7.20663			P (two-tailed)	<0.0001
Galactose 1-phosphate	-8.28245	-7.20663			P value summary	****
SM (d18:1/16:0)	-2.13807	-1.7547			Exact or approximate P value?	Approximate
Aspartate	1.96113	1.59238			Significant? (alpha = 0.05)	Yes
PC (32:0)	1.03073	1.52625
PE (38:4)	0.780069	1.26788			Number of XY Pairs	247
Tryptophan	-3.35428	-3.68204
Carnitine (5:0)	-1.30584	-2.09099
P-DMEA	-1.20014	-1.48308				Pipetted Log2 Fold Change
PE (38:5)	0.905156	1.34218			Best-fit values
SM (d18:1/18:0)	-3.30856	-2.49312			Slope	0.9561
PC (32:2)	-1.53236	-1.22595			Y-intercept	-0.06047
Glutathione	1.13308	1.49189			X-intercept	0.06324
PC (32:1)	-1.41115	-1.11342			1/slope	1.046
PC (38:5)	0.662867	1.05052
PC (40:4)	1.71791	2.05461			Std. Error
Myoinositol	-1.85023	-1.90375			Slope	0.03177
Phosphoethanolamine	-4.24448	-4.31472			Y-intercept	0.0576
PE (38:1)	0.624666	1.0789
PE (40:5)	0.741735	1.24013			95% Confidence Intervals
PC (34:1)	0.638233	1.04732			Slope	0.8935 to 1.019
Hypotaurine	1.76673	1.39718			Y-intercept	-0.1739 to 0.05299
Phosphorylcholine	-1.15977	-1.53564			X-intercept	-0.05491 to 0.1844
PE (40:7)	1.49731	1.81003
beta-Glycerophosphate	0	4.91608			Goodness of Fit
Glycerol 3-phosphate	5.78248	4.91608			R squared	0.7871
Adenosine diphosphate ribose	4.08266	6.48418			Sy.x	0.8942
Carnitine	-1.49261	-1.71298
Carnitine (14:0)	-5.21107	-6.07549			Is slope significantly non-zero?
PE (38:6)	1.57625	1.73024			F	905.9
ADP-ribose	3.84906	6.33936			DFn, DFd	1, 245
UDP-glucose	1.39305	1.446			P value	<0.0001
Sphinganine	0.0740527	0.730434			Deviation from zero?	Significant
Glutathione disulfide	1.59586	1.76904
SM (d18:1/14:0)	-1.52029	-1.13993			Equation	Y = 0.9561*X - 0.06047
UDP-N-acetylglucosamine	1.58038	1.48409
Glycerophosphocholine	1.62761	1.15494			Data
PC (40:8)	0.818517	1.23525			Number of X values	247
Indole-3-acrylate	-4.19857	-4.11246			Maximum number of Y replicates	1
Lyso-PC (18:0)	-1.4074	-0.96574			Total number of values	247
Platelet-activating factor	-1.4074	-0.96574			Number of missing values	0
PS (38:3)	-1.73491	-1.21977
Carnitine (3:0)	-4.00239	-3.43476
Carnitine (18:1)	-5.78405	-5.81447
Nicotinamide	3.03948	2.75024
2-Quinolinecarboxylate	-2.99158	-4.27673
4-Quinolinecarboxylate	-2.99158	-4.27673
Carnitine (16:0)	-2.14986	-1.95488
PC (36:4)	0.272192	0.678404
Carnitine (18:0)	-4.93414	-3.85986
Creatine	-2.02306	-2.03419
N-Acetylmethionine	2.01083	2.69976
Taurine	0.840718	0.571294
Acetylaminoadipate	1.69814	1.58103
PC (44:8)	3.78899	4.88921
SM (d18:1/22:0)	-7.7331	-7.25504
trans-Aconitate	-1.93111	-1.66323
NAD+	-0.585453	-0.913718
Carnitine (16:1)	-2.8747	-5.47874
PC (36:2)	0.280223	0.659297
PC (40:6)	0.19497	0.610441
Carnitinamide	-3.85836	-3.52869
Pyridoxine	0.701159	3.83324
PE (32:0)	-2.62147	-2.39806
PE (36:2)	0.190585	0.5813
PC (36:1)	-0.00533302	0.609004
NADPH	-2.70102	-3.58503
Cyclic ADP-ribose	-0.674397	-0.919293
3-Hydroxycarnitine (4:0)	-1.08839	-2.24883
Malate	0.925166	1.28192
PE (34:1)	0.0401743	0.429728
PS (40:6)	-1.04373	-0.628945
PC (38:4)	0.0313609	0.450105
Oxalate	0.201162	0.789548
Isoleucine	0.0317469	-0.64567
Tyrosine	-2.56772	-2.6108
Lyso-PC (16:0)	-0.798025	-0.660628
CDP-ethanolamine	-0.522383	-0.733725
PC (34:2)	-0.751511	-0.412478
Glycerophosphoinositol	-0.526014	-0.760041
Hypoxanthine	-0.65914	-3.86643
Val-Lys	-0.451847	-0.820578
Arginine	0.944319	0.404553
Alanine	1.00477	1.11906
Hydroxy-FA (8:0)	0.287268	0.64239
3-Hydroxycarnitine (14:0)	-0.288368	-2.4473
PE (36:1)	-0.101901	0.360656
1-Phenylethanol	0.370519	0.726098
Inosine monophosphate	-1.48555	-3.60882
Pantothenate	-1.71112	-1.54301
PS (34:2)	-1.89207	-1.25581
Oleamide	-1.02728	-2.38204
Cystathionine	0	-1.62164
PE (34:2)	-0.661428	-0.334401
NADH	-1.05743	-1.9767
Glyceraldehyde 3-phosphate	-2.09861	-2.0372
Phenylalanine	-1.00489	-0.854443
Lyso-PC (17:0)	-2.9496	-1.93813
Trigonelline	1.82715	1.43156
Cys-Gly	2.31508	2.42747
Histidine	-0.0518913	-0.37904
3-Hydroxycarnitine (16:0)	-0.141904	-2.12095
3-Hydroxypyruvate	0.194829	0.897879
Salicylate	0.434449	0.815474
3-Hydroxycarnitine (5:0)	-0.870146	-1.64833
Glutamate	0.41781	0.314293
PS (40:5)	-0.832901	-0.322901
Hydroxy-FA (7:0)	0.351083	0.711634
Methionine	-0.500665	-0.591357
Proline	0.0466438	-0.289028
Ophthalmate	-1.15506	-1.24738
2',4'-Dihydroxyacetophenone	-0.0184787	0.819798
Resorcinol monoacetate	-0.0184787	0.819798
Sedoheptulose 7-phosphate	0.357851	-2.11511
Mevalolactone	0.0364418	-0.533569
Allantoin	0.0963474	-1.5634
PS (36:4)	0.894283	1.10988
Leucine	-0.0130924	-0.615371
PS (38:5)	0.199863	0.589851
Oxohexanoic acid	0.00649457	-0.651313
CMP-2-aminoethylphosphonate	-0.981335	-2.45498
N-Acetylhexosamine phosphate	-0.720059	-0.701217
Glucose 6-phosphate	-1.66904	-1.5231
SM (d18:1/18:1)	-1.15665	-0.76668
Hydroxy-FA (10:0)	0.328266	0.55271
Glu-Glu	-0.239542	-1.33953
Lyso-PC (18:2)	-0.460398	-1.66287
Adenosine monophosphate	-0.248339	-0.653728
FA (8:0)	0.0796827	0.634171
Argininosuccinate	4.54341	0.743471
PE (38:3)	-0.737709	-0.211992
2-/3-Phosphoglycerate	-1.63334	-1.93223
Lyso-PE (20:4)	-1.13117	-1.59721
Leu-Pro	-0.326198	-0.851961
4-Guanidinobutanoate	0.486143	0.588923
PE (36:3)	-0.0145266	0.303428
Hydroxy-FA (18:1)	0.204831	0.453413
Lyso-PC (18:1)	-0.738666	-0.208476
Adenosine diphosphate	-0.00856277	-0.318026
5,6 Dimethylbenzimidazole	0.155256	1.3457
FA (14:0)	-0.0397711	0.721635
Succinate	0.350377	0.674654
Malonate	0.111119	0.542814
alpha-Ketoglutarate	-0.939461	-1.69998
Decanoate	-0.0073032	0.57941
1-Methylhistidine	-0.660614	-0.91016
Glutamine	0.324531	0.123964
S-Adenosylhomocysteine	0	-1.19091
Glucosamine 6-phosphate	0.253027	0.999689
Glycerol cyclic phosphate	0.14694	0.980566
Lactate	0.341552	0.666977
PC (36:5)	-0.229511	0.114235
Glu-Pro	-0.399564	-0.899067
Carnitine (12:0)	-1.56056	-1.50772
Dethiobiotin	0.343538	1.02827
PI (32:0)	-0.00195068	0.475928
S-Adenosylmethionine	0.383243	-0.238118
S-Methylthioadenosine	0.764661	-0.895734
Phosphoenolpyruvate	-0.144789	0.847224
FA (16:1)	-0.0338175	0.983739
Creatinine	-0.0241718	-0.277928
Fumarate	0.826501	0.695955
Uridine monophosphate	0.568842	0.495102
Indole	0.54321	0.512676
Choline	0.797513	0.445887
NADP+	1.02267	-1.09458
Carnitine (4:0)	-1.00842	-0.581381
Hexosamines	0.209565	1.22053
Azelate	-0.576004	0.72005
Guanosine diphosphate mannose	-0.21078	-0.812739
Leu-Leu	0.127567	0.681643
3-Hydroxymethylglutarate	-0.187472	-0.137006
Suberate	-0.357696	1.1353
N-Formylmethionine	1.60217	1.03375
Acetylcholine	0.419507	0.0881232
Deoxycarnitine	0.419507	0.0882359
N,N,N-Trimethyllysine	0.137303	-1.05669
Cortisol 21-acetate	0.525545	1.1314
Hydroxy-FA (12:0)	0.389578	0.45441
Phosphoserine	1.21317	-0.624037
FA (16:0)	0.172927	0.422843
Lyso-PE (18:0)	-0.478673	-0.0939809
Guanosine monophosphate	-2.13585	-0.923615
Carnitine (17:0)	-1.14158	-0.646731
Methyl vanillate	-0.321208	0.819764
FA (12:0)	0.519307	0.619812
FA (20:0)	-0.184098	0.347087
Citicoline	0.447864	0.143303
Lysine	0.0787587	-0.531362
Hexitols	-0.758146	-0.519961
Sulfolactate	0.465826	0.574906
N,N-Dimethylarginine	0.557404	-0.171782
PS (40:7)	0.290715	0.269763
Pentoses	-0.158239	-0.63561
Ornithine	1.93293	-0.662729
Adenosine triphosphate	0.178959	-0.146573
Gamma-aminobutyrate	-0.101209	-0.130573
PS (38:6)	0.102877	0.684714
Theanine	-0.519947	-0.601341
PS (36:1)	-0.622152	-0.0558777
Thiamine monophosphate	-0.204095	-0.26005
Ureidosuccinate	0.570953	0.676062
FA (18:0)	0.203989	0.264408
Adenosine	1.2904	0.727716
FA (18:1)	-0.107825	0.307591
2-Hydroxybutyrate	0.410135	0.333719
5-Aminolevulinate	0.131682	-0.161273
cis-4-Hydroxyproline	0.131682	-0.161273
Asparagine	0.398986	-0.0627827
Quinolinate	1.66927	0.396293
Uridine diphosphate	0.831554	0.0752349
Lyso-PE (16:0)	0.988032	0.421459
trans-4-Hydroxyproline	0.136352	-0.11949
Cytidine monophosphate	1.02311	0.4765
Itaconate	0.11916	0.252033
Citramalate	-0.0815003	-0.115154
Cellobiose	1.42605	0.614964
Citrulline	0.209466	-0.167373
Maltose	1.42605	0.614964
Urocanate	1.56079	0.432595
N-Undecanoylglycine	0.907645	0.28371
Cytidine diphosphate	1.70217	0.146771
FA (20:2)	-1.29726	-0.368602
Palatinose	1.42605	0.416519
Homocysteine thiolactone	0.222445	-0.123122
Xanthine	-1.01205	-0.241844
Lyso-PE (18:1)	-0.540705	0.0560282
Serine	0.701592	0.022059
2-Hydroxyglutarate	-0.0331535	0.0296816
Glucuronolactone	0.18017	-0.0750238
Lumichrome	0.860994	0.0429868
Uridine	-0.718332	0.0410906
Ribulose/Ribose/Xylulose 5-phosphate	-0.622263	-0.0380689
Deoxyribose	0.703784	-0.0371796
4-Pyridoxate	-0.448167	0.0175955
3-Hydroxycarnitine (18:1)	-0.0548221	-0.29765
4alpha-Hydroxyformyl-4beta-methyl-5alpha-cholest-8-en-3beta-ol	0.362121	0
Ala-Leu	0.133673	0.17341
Carnosine	0.488788	0.0145671
Estradiol 17-alpha	0.129508	-0.125
Thiamine	0.145752	0

[truncated: 6 more sheets: 1K, 1L, 1M, 1N, 1O, 1P]
