# Supplementary material for: Metabolomic profiling of rare cell populations isolated by flow cytometry from tissues
Source: eLife. 2021 Jan 20;10:e61980. doi: 10.7554/eLife.61980 (PMC7847306; doi:10.7554/eLife.61980)
Supplement: Figure 1—source data 2. — Metabolites enriched or depleted in cells sorted using 1× phosphate buffered saline (PBS) sheath fluid vs 0.5× PBS sheath fluid (fold change >2 and false discovery rate [FDR] < 0.05). Supplementary table 1b. Metabolites enriched or depleted in cells sorted using 1× PBS sheath fluid vs 0.5× PBS sheath fluid (fold change = 1.5–2 and FDR < 0.05). Correlation analysis of metabolite levels from 1× PBS versus 0.5× PBS samples: Spearman r = 0.995, y = 1.3 × −2142387. These metabolites were not significantly enriched in any metabolic pathway by pathway enrichment analysis. [file elife-61980-fig1-data2.xlsx]

## Sheet: Sheet1
	Figure 1 - source data 2
	Figure 1 – supplementary table 1a. Metabolites enriched or depleted in cells sorted using 1x PBS sheath fluid vs 0.5x PBS sheath fluid (fold change > 2 and FDR < 0.05).
	Correlation analysis of metabolite levels from 1x PBS versus 0.5x PBS samples: Spearman r = 0.995, y = 1.3x -2142387. These metabolites were not significantly enriched in any metabolic pathway by pathway enrichment analysis.
	Metabolite	FC (1x PBS / 0.5x PBS)	FDR
	Fructose 6-phosphate	0.21	0
	N-Acetylhexosamine sulfate	0.25	0
	N-Ribosylnicotinamide	0.25	0
	5-Aminolevulinate	0.26	0
	Inosine	0.29	0.0005
	Val-Phe	0.29	0
	Allantoin	0.31	0.0148
	Cytidine cyclic phosphate	0.34	0.0013
	PE (38:3)	0.39	0.0297
	Glucose	0.42	0
	Deoxypentose monophosphates	0.42	0
	Carnitine (8:0)	0.44	0.009
	Hydroxy-FA (7:0)	0.47	0.0001
	Acetylacrylate	0.48	0
	Phosphorylcholine	2.39	0
	Phosphoenolpyruvate	2.69	0.002
	Arg-Ala	3.05	0.0222
	Guanosine triphosphate	4.25	0
	Figure 1 – supplementary table 1b. Metabolites enriched or depleted in cells sorted using 1x PBS sheath fluid vs 0.5x PBS sheath fluid (fold change = 1.5 to 2 and FDR < 0.05).
	Metabolite	FC (1x PBS / 0.5x PBS)	FDR
	3-Hydroxycarnitine (18:1)	0.51	0.0215
	Guanosine monophosphate (GMP)	0.51	0.0036
	Uridine	0.53	0.0162
	S-Methyl-thioadenosine	0.54	0.0099
	Creatine	0.55	0
	Hydroxydecanoic Acid (C10:0, -OH)	0.57	0
	Dimethyllysine	0.61	0.0179
	Hexoseamine	0.63	0
	Oxohexanoic acid	0.64	0.0101
	Guanine	0.64	0.0234
	Dipthamide	0.64	0.0309
	Hydroxydodecanoic Acid (C12:0, -OH)	0.65	0
	FA (12:0)	0.66	0.0026
	Guanidine acetic acid	1.52	0
	FA (20:0)	1.52	0.0063
	Ala-Leu	1.91	0.0001
