# Supplementary material for: Metabolomic profiling of rare cell populations isolated by flow cytometry from tissues
Source: eLife. 2021 Jan 20;10:e61980. doi: 10.7554/eLife.61980 (PMC7847306; doi:10.7554/eLife.61980)
Supplement: Figure 1—source data 3. — Metabolites enriched or depleted in sorted vs pipetted AML cells (fold change >2 and false discovery rate [FDR] < 0.05). Correlation analysis of sorted versus pipetted AML samples: spearman r = 0.997, y = 1.1 × +214263. Metabolites that differed between sorted and pipetted AML cells were significantly enriched in ‘cysteine and methionine metabolism’. Supplementary table 2b. Metabolites enriched or depleted in sorted versus pipetted AML cells (fold change = 1.5–2 and FDR < 0.05). [file elife-61980-fig1-data3.xlsx]

## Sheet: Sheet1
	Figure 1 - source data 3
	Figure 1 – supplementary table 2a. Metabolites enriched or depleted in sorted vs pipetted AML cells (fold change > 2 and FDR < 0.05).
	Correlation analysis of sorted versus pipetted AML samples: spearman r = 0.997, y = 1.1x + 214263. Metabolites that differed between sorted and pipetted AML cells were significantly enriched in “cysteine and methionine metabolism”.
	Metabolite	FC (Sorted AML/ Pipetted AML)	FDR
	Argininosuccinate	0.048	0
	Phosphoserine	0.07	0
	Carnitine (16:1)	0.156	0
	Sedoheptulose 7-phosphate	0.175	0
	Guanosine diphosphate mannose	0.178	0
	Ornithine	0.19	0.0005
	N,N,N-Trimethyllysine	0.199	0.0008
	NADP+	0.213	0.0004
	3-Hydroxycarnitine (14:0)	0.262	0
	NADH	0.272	0
	3-Hydroxycarnitine (16:0)	0.288	0
	CMP-2-aminoethylphosphonate	0.299	0.0072
	S-Methylthioadenosine	0.322	0.0003
	Cystathionine	0.325	0
	S-Adenosylhomocysteine	0.347	0.002
	beta-Glycerophosphate	0.362	0
	Glycerol 3-phosphate	0.362	0
	N,N-Dimethylarginine	0.362	0
	2-Quinolinecarboxylate	0.376	0
	4-Quinolinecarboxylate	0.376	0
	Glu-Pro	0.377	0.0005
	Lysine	0.377	0.0034
	Glucose 6-phosphate	0.377	0.0011
	Allantoin	0.395	0.0009
	Lyso-PC (18:2)	0.422	0.0084
	3-Hydroxycarnitine (4:0)	0.447	0
	Serine	0.455	0
	Isoleucine	0.461	0
	Glycerophosphocholine	0.466	0
	Glu-Glu	0.467	0.004
	Nicotinamide	0.47	0
	S-Adenosylmethionine	0.482	0
	Arginine	0.487	0
	Uridine monophosphate	2.117	0.0001
	2',4'-Dihydroxyacetophenone	2.14	0
	Resorcinol monoacetate	2.14	0
	FA (8:0)	2.189	0
	Decanoate	2.337	0
	FA (14:0)	2.347	0
	Inosine monophosphate	2.363	0.015
	FA (16:1)	2.654	0.0046
	Azelate	2.663	0.0007
	Guanosine monophosphate	4.163	0.0022
	Figure 1 – supplementary table 2b. Metabolites enriched or depleted in sorted versus pipetted AML cells (fold change = 1.5 to 2 and FDR < 0.05).
	Metabolite	FC (Sorted AML/ Pipetted AML)	FDR
	Adenosine triphosphate	0.5	0
	Hypoxanthine	0.52	0.0451
	NADPH	0.54	0.0108
	Carnitine (16:0)	0.55	0
	Leucine	0.55	0
	Cytidine diphosphate	0.55	0.0281
	Carnitinamide	0.56	0.004
	Trigonelline	0.57	0.0016
	Carnitine (5:0)	0.58	0
	Phosphorylcholine	0.58	0
	3-Hydroxycarnitine (5:0)	0.58	0.0162
	Methionine	0.59	0
	Val-Lys	0.6	0
	Glycerophosphoinositol	0.6	0
	Asparagine	0.61	0
	N-Acetylaspartate	0.61	0
	Ophthalmate	0.61	0.0117
	P-DMEA	0.62	0
	Glycerophosphoethanolamine	0.62	0
	N-Acetylhexosamine phosphate	0.63	0.0008
	Aspartate	0.63	0
	Lyso-PC (17:0)	0.63	0.0395
	Citicoline	0.64	0
	Leu-Pro	0.64	0.0166
	Indole-3-acrylate	0.64	0.0149
	Indole	1.61	0.0101
	FA (18:0)	1.62	0.0226
	Hydroxy-FA (7:0)	1.65	0
	Hydroxy-FA (8:0)	1.68	0
	Hydroxy-FA (18:1)	1.71	0
	Hydroxy-FA (10:0)	1.74	0
	FA (20:0)	1.77	0.004
	Lactate	1.78	0.0032
	FA (18:1)	1.78	0.023
	FA (16:0)	1.8	0.003
	1-Phenylethanol	1.81	0
	Adenosine monophosphate	1.82	0.0001
	Leu-Leu	1.85	0.017
	Sphinganine	1.9	0
	3-Hydroxypyruvate	1.97	0
	Carnitine (18:0)	1.98	0.0008
