# Supplementary material for: Metabolomic profiling of rare cell populations isolated by flow cytometry from tissues
Source: eLife. 2021 Jan 20;10:e61980. doi: 10.7554/eLife.61980 (PMC7847306; doi:10.7554/eLife.61980)
Supplement: Figure 1—source data 4. — Metabolites enriched or depleted in sorted vs pipetted ALL cells (fold change >2 and false discovery rate [FDR] < 0.05). Correlation analysis: Spearman r = 0.999, y = 1.1 × –436390. The metabolites were not significantly enriched in any metabolic pathway. Supplementary table 3b. Metabolites enriched or depleted in sorted versus pipetted ALL cells (fold change = 1.5–2 and FDR < 0.05). [file elife-61980-fig1-data4.xlsx]

## Sheet: Sheet1
	Figure 1 - source data 4
	Figure 1 – supplementary table 3a. Metabolites enriched or depleted in sorted vs pipetted ALL cells (fold change > 2 and FDR < 0.05). Correlation analysis: Spearman r = 0.999, y = 1.1x – 436390. The metabolites were not significantly enriched in any metabolic pathway.
	Metabolite	FC (Sorted ALL / Pipetted ALL)	FDR
	Pyridoxine	0.11	0
	ADP-ribose	0.17	0
	Phosphoserine	0.25	0
	Guanosine diphosphate mannose	0.27	0.0002
	Adenosine diphosphate ribose	0.29	0.0001
	Lyso-PC (17:0)	0.31	0
	Glucose 6-phosphate	0.34	0.0007
	Fructose 6-phosphate	0.38	0
	Galactose 1-phosphate	0.38	0
	Carnitinamide	0.44	0.0003
	Phosphoenolpyruvate	0.47	0.0119
	Carnitine (16:0)	0.48	0
	Lyso-PC (18:1)	0.49	0
	PC (44:8)	0.5	0.0106
	Uridine monophosphate	2.23	0.0001
	Adenosine monophosphate	2.41	0
	Oleamide	2.51	0.001
	Hypoxanthine	4.84	0.0001
	Inosine monophosphate	10.3	0
	Figure 1 – supplementary table 3b. Metabolites enriched or depleted in sorted versus pipetted ALL cells (fold change = 1.5 to 2 and FDR < 0.05).
	Metabolite	FC (Sorted ALL / Pipetted ALL)	FDR
	NADH	0.52	0.006
	Glu-Pro	0.53	0.0182
	Nicotinamide	0.57	0.0002
	trans-Aconitate	0.59	0
	Malate	0.59	0
	N,N-Dimethylarginine	0.6	0.0001
	Lyso-PC (18:0)	0.6	0
	Platelet-activating factor	0.6	0
	Indole-3-acrylate	0.6	0.0089
	Carnitine (4:0)	0.61	0.0249
	Glyceraldehyde 3-phosphate	0.61	0.0421
	N-Acetylmethionine	0.62	0.0013
	N-Acetylhexosamine phosphate	0.62	0.0009
	Methionine	0.63	0
	Adenosine triphosphate	0.63	0.0001
	SM (d18:1/18:1)	0.64	0.0044
	Glycerophosphocholine	0.65	0
	UDP-glucose	0.65	0
	Lyso-PC (16:0)	0.65	0
	Ophthalmate	0.65	0.0335
	Pantothenate	0.66	0.0091
	beta-Glycerophosphate	0.66	0.0376
	Glycerol 3-phosphate	0.66	0.0376
	FA (16:0)	1.51	0.0365
	Decanoate	1.56	0.0063
	FA (18:0)	1.56	0.0456
	Indole	1.64	0.0102
	Uridine diphosphate	1.68	0
