# Supplementary material for: Metabolomic profiling of rare cell populations isolated by flow cytometry from tissues
Source: eLife. 2021 Jan 20;10:e61980. doi: 10.7554/eLife.61980 (PMC7847306; doi:10.7554/eLife.61980)
Supplement: Figure 1—source data 5. — Metabolites that significantly differed between AML and ALL cells in both sorted and pipetted samples, sorted samples only, or pipetted samples only. Metabolites that significantly differed between AML and ALL cells in both sorted and pipetted samples were significantly enriched in ‘glycerophospholipid metabolism’. No pathways were enriched among metabolites that differed in only sorted samples or only in pipetted samples. Supplementary table 4b. Metabolites that significantly differed between sorted AML and ALL cells or pipetted AML and ALL cells and for which fold change was between 1.5 and 2 in either the sorted or pipetted samples (FDR < 0.05). [file elife-61980-fig1-data5.xlsx]

## Sheet: Sheet1
	Figure 1 - source data 5
	Figure 1 – supplementary table 4a – Metabolites that significantly differed between AML and ALL cells in both sorted and pipetted samples, the sorted samples only, or the pipetted samples only.
	Metabolites that significantly differed between AML and ALL cells in both sorted and pipetted samples were significantly enriched in “glycerophospholipid metabolism”. No pathways were enriched for metabolites that differed in only the sorted samples or only the pipetted samples.
	Different between ALL and AML cells in both sorted and pipetted samples (fold change > 2 and FDR < 0.05)
		Sorted		Pipetted
	Metabolite	FC (ALL/AML)	FDR	FC (ALL/AML)	FDR
	Fructose 6-phosphate	0.003	0	0.007	0
	Galactose 1-phosphate	0.003	0	0.007	0
	SM (d18:1/22:0)	0.005	0	0.007	0
	Carnitine (18:1)	0.018	0	0.018	0
	Carnitine (14:0)	0.027	0	0.015	0
	3-Hydroxycarnitine (6:0)	0.03	0	0.031	0
	Methacholine	0.031	0	0.025	0
	Carnitine (18:0)	0.033	0	0.069	0
	Acetylcarnitine	0.037	0	0.033	0
	Phosphoethanolamine	0.053	0	0.05	0
	Indole-3-acrylate	0.054	0	0.058	0
	Carnitine (3:0)	0.062	0	0.092	0
	Carnitinamide	0.069	0	0.087	0
	N-Acetylaspartate	0.075	0	0.046	0
	Tryptophan	0.098	0	0.078	0
	SM (d18:1/18:0)	0.101	0	0.178	0
	2-Quinolinecarboxylate	0.126	0	0.052	0
	4-Quinolinecarboxylate	0.126	0	0.052	0
	Lyso-PC (17:0)	0.129	0	0.261	0
	Carnitine (16:1)	0.136	0	0.022	0
	NADPH	0.154	0	0.083	0
	PE (32:0)	0.163	0	0.19	0
	Tyrosine	0.169	0	0.164	0
	Carnitine (16:0)	0.225	0	0.258	0
	SM (d18:1/16:0)	0.227	0	0.296	0
	Glyceraldehyde 3-phosphate	0.233	0	0.244	0
	Creatine	0.246	0	0.244	0
	trans-Aconitate	0.262	0	0.316	0
	PS (34:2)	0.269	0	0.419	0
	Myoinositol	0.277	0	0.267	0
	PS (38:3)	0.3	0	0.429	0
	Pantothenate	0.305	0	0.343	0
	Glucose 6-phosphate	0.314	0.0002	0.348	0.0004
	2-/3-Phosphoglycerate	0.322	0.0062	0.262	0.0014
	Carnitine (12:0)	0.339	0.0139	0.352	0.0152
	PC (32:2)	0.346	0	0.428	0
	SM (d18:1/14:0)	0.349	0	0.454	0
	Carnitine	0.355	0	0.305	0
	Inosine monophosphate	0.357	0.0042	0.082	0
	PC (32:1)	0.376	0	0.462	0
	Carnitine (5:0)	0.404	0	0.235	0
	P-DMEA	0.435	0	0.358	0
	Phosphorylcholine	0.448	0	0.345	0
	Ophthalmate	0.449	0.0002	0.421	0.0001
	Lyso-PE (20:4)	0.457	0.0225	0.331	0.0018
	3-Hydroxycarnitine (4:0)	0.47	0	0.21	0
	NADH	0.48	0.0017	0.254	0
	Oleamide	0.491	0.0053	0.192	0
	Alanine	2.007	0	2.172	0
	PC (32:0)	2.043	0	2.88	0
	Glutathione	2.193	0	2.813	0
	PC (40:5)	2.267	0	2.965	0
	UDP-glucose	2.626	0	2.725	0
	PE (40:7)	2.823	0	3.507	0
	PE (38:6)	2.982	0	3.318	0
	UDP-N-acetylglucosamine	2.99	0	2.797	0
	Glutathione disulfide	3.023	0	3.408	0
	Glycerophosphocholine	3.09	0	2.227	0
	Acetylaminoadipate	3.245	0	2.992	0
	PC (40:4)	3.29	0	4.154	0
	Hypotaurine	3.403	0	2.634	0
	Trigonelline	3.548	0	2.697	0
	Aspartate	3.894	0	3.015	0
	N-Acetylmethionine	4.03	0	6.497	0
	Glycerophosphoethanolamine	4.395	0	3.434	0
	Cys-Gly	4.976	0	5.38	0
	Nicotinamide	8.222	0	6.728	0
	PC (44:8)	13.823	0	29.635	0
	ADP-ribose	14.411	0	80.972	0
	Adenosine diphosphate ribose	16.943	0	89.523	0
	Glycerol 3-phosphate	55.043	0	30.192	0
	Different between ALL and AML cells only in sorted samples (fold change > 2 and FDR < 0.05)
		Sorted		Pipetted
	Metabolite	FC (ALL/AML)	FDR	FC (ALL/AML)	FDR
	Guanosine monophosphate	0.228	0.0014	0.527	0.13
	Lyso-PC (18:0)	0.377	0	0.512	0
	Platelet-activating factor	0.377	0	0.512	0
	SM (d18:1/18:1)	0.449	0	0.588	0.0006
	Carnitine (17:0)	0.453	0.0131	0.639	0.1375
	PS (40:6)	0.485	0	0.647	0
	Carnitine (4:0)	0.497	0.0016	0.668	0.0498
	Phenylalanine	0.498	0	0.553	0
	Phosphoserine	2.318	0.0028	0.649	0.0965
	N-Formylmethionine	3.036	0.0103	2.047	0.0817
	Quinolinate	3.181	0.0076	1.316	0.5076
	Cytidine diphosphate	3.254	0.0001	1.107	0.697
	Ornithine	3.818	0.0031	0.632	0.2763
	Argininosuccinate	23.319	0	1.674	0.0011
	Different between ALL and AML cells only in pipetted samples (fold change > 2 and FDR < 0.05)
		Sorted		Pipetted
	Metabolite	FC (ALL/AML)	FDR	FC (ALL/AML)	FDR
	CMP-2-aminoethylphosphonate	0.507	0.1247	0.182	0.0003
	alpha-Ketoglutarate	0.521	0.1284	0.308	0.0058
	3-Hydroxycarnitine (5:0)	0.547	0.0077	0.319	0
	Hypoxanthine	0.633	0.1613	0.069	0
	Lyso-PC (18:2)	0.727	0.3334	0.316	0.0007
	3-Hydroxycarnitine (14:0)	0.819	NA	0.183	0
	Glu-Glu	0.847	NA	0.395	0.0006
	3-Hydroxycarnitine (16:0)	0.906	NA	0.23	0
	Cystathionine	1	NA	0.325	0
	S-Adenosylhomocysteine	1	NA	0.438	0.0106
	Allantoin	1.069	NA	0.338	0.0001
	5,6 Dimethylbenzimidazole	1.114	0.769	2.542	0.004
	Dethiobiotin	1.269	0.4504	2.04	0.0152
	Sedoheptulose 7-phosphate	1.282	NA	0.231	0.0001
	PE (38:1)	1.542	0	2.112	0
	PC (34:1)	1.556	0	2.067	0
	PC (38:5)	1.583	0	2.071	0
	Pyridoxine	1.626	0.0302	14.253	0
	PE (40:5)	1.672	0	2.362	0
	PE (38:4)	1.717	0	2.408	0
	PC (40:8)	1.764	0	2.354	0
	PS (36:4)	1.859	0.0014	2.158	0.0002
	PE (38:5)	1.873	0	2.535	0
	Malate	1.899	0	2.432	0
	NADP+	2.032	0.0713	0.468	0.0468
	beta-Glycerophosphate	NA	NA	30.192	0
	Figure 1- supplementary table 4b. Metabolites that significantly differed between sorted AML and ALL cells or pipetted AML and ALL cells and for which fold change was between 1.5 and 2 in either the sorted or pipetted samples (FDR < 0.05).
		Sorted		Pipetted
	Metabolite	FC (ALL/AML)	FDR	FC (ALL/AML)	FDR
	3-Hydroxycarnitine (5:0)	0.55	0.0077	0.319	0
	PS (40:5)	0.56	0	0.799	0
	Lyso-PC (16:0)	0.58	0	0.633	0
	PC (34:2)	0.59	0	0.751	0
	Lyso-PC (18:1)	0.6	0	0.865	0.0032
	PE (38:3)	0.6	0	0.863	0.0013
	N-Acetylhexosamine phosphate	0.61	0.0003	0.615	0.0004
	Cyclic ADP-ribose	0.63	0	0.529	0
	PE (34:2)	0.63	0	0.793	0
	1-Methylhistidine	0.63	0.0541	0.532	0.0081
	PS (36:1)	0.65	0	0.962	0.3523
	PE (38:1)	1.54	0	2.112	0
	PC (34:1)	1.56	0	2.067	0
	PC (38:5)	1.58	0	2.071	0
	Pyridoxine	1.63	0.0302	14.253	0
	Serine	1.63	0	1.015	0.8411
	PE (40:5)	1.67	0	2.362	0
	PE (38:4)	1.72	0	2.408	0
	Choline	1.74	0.001	1.362	0.0459
	PC (40:8)	1.76	0	2.354	0
	Fumarate	1.77	0.0192	1.62	0.0419
	Uridine diphosphate	1.78	0	1.054	0.555
	Taurine	1.79	0	1.486	0
	PS (36:4)	1.86	0.0014	2.158	0.0002
	PE (38:5)	1.87	0	2.535	0
	Malate	1.9	0	2.432	0
	Arginine	1.92	0	1.324	0
	Lyso-PC (18:0)	0.38	0	0.512	0
	Platelet-activating factor	0.38	0	0.512	0
	NAD+	0.67	0	0.531	0
	Glu-Pro	0.76	0.2824	0.536	0.0129
	S-Methylthioadenosine	1.7	0.061	0.537	0.0254
	Phenylalanine	0.5	0	0.553	0
	Leu-Pro	0.8	0.23	0.554	0.002
	Val-Lys	0.73	0.0001	0.566	0
	SM (d18:1/18:1)	0.45	0	0.588	0.0006
	Glycerophosphoinositol	0.69	0	0.59	0
	CDP-ethanolamine	0.7	0	0.601	0
	Adenosine monophosphate	0.84	0.1921	0.636	0.0009
	Oxohexanoic acid	1	0.9719	0.637	0.0003
	Isoleucine	1.02	0.6945	0.639	0
	PS (40:6)	0.49	0	0.647	0
	Leucine	0.99	0.9408	0.653	0.0002
	4-Guanidinobutanoate	1.4	0.0099	1.504	0.0021
	PS (38:5)	1.15	0.1775	1.505	0.0002
	PC (36:1)	1	0.9371	1.525	0
	PC (40:6)	1.14	0.0003	1.527	0
	FA (8:0)	1.06	0.6945	1.552	0.0011
	Hydroxy-FA (8:0)	1.22	0.001	1.561	0
	PC (36:2)	1.21	0	1.579	0
	Lactate	1.27	0.21	1.588	0.0123
	Succinate	1.27	0.1437	1.596	0.005
	PC (36:4)	1.21	0	1.6	0
	Hydroxy-FA (7:0)	1.28	0.0204	1.638	0
	FA (14:0)	0.97	0.8942	1.649	0.004
	1-Phenylethanol	1.29	0.0005	1.654	0
	Sphinganine	1.05	0.0975	1.659	0
	Argininosuccinate	23.32	0	1.674	0.0011
	Oxalate	1.15	0.0201	1.729	0
	Salicylate	1.35	0.0054	1.76	0
	2',4'-Dihydroxyacetophenone	0.99	0.9367	1.765	0.0001
	Resorcinol monoacetate	0.99	0.9367	1.765	0.0001
	Phosphoenolpyruvate	0.9	0	1.799	0.0346
	3-Hydroxypyruvate	1.14	0.2478	1.863	0
	Glycerol cyclic phosphate	1.11	0.7381	1.973	0.0113
	FA (16:1)	0.98	0.9471	1.978	0.0365
