# Supplementary material for: Metabolomic profiling of rare cell populations isolated by flow cytometry from tissues
Source: eLife. 2021 Jan 20;10:e61980. doi: 10.7554/eLife.61980 (PMC7847306; doi:10.7554/eLife.61980)
Supplement: Figure 1—source data 6. — Metabolites enriched or depleted at various time points after the incubation of cell suspensions on ice. The fold change cutoff is indicated in the left column. All are false discovery rate (FDR) < 0.05. Correlation analysis: 5 min versus 15 min: Spearman r = 0.998; 5 min versus 30 min: Spearman r = 0.996; 5 min versus 60 min: Spearman r = 0.992. [file elife-61980-fig1-data6.xlsx]

## Sheet: Sheet1
	Figure 1 - source data 6
	Figure 1 – supplementary table 5. Metabolites enriched or depleted at various time points after the incubation of cell suspensions on ice. The fold change cutoff is indicated in the left column. All are FDR < 0.05. Correlation analysis: 5 min versus 15 min: Spearman r = 0.998; 5 min versus 30 min: Spearman r = 0.996; 5 min versus 60 min: Spearman r = 0.992
	15 min vs 5 min
	Fold change cutoff	Metabolite	FC (15 min / 5 min)	FDR
	FC > 2	3-Hydroxycarnitine (16:0)	2.22	0.0003
		3-Hydroxycarnitine (14:0)	2.27	0.0152
	30 min vs 5 min
	Fold change cutoff	Metabolite	FC (30 min / 5 min)	FDR
	FC > 2	Hypoxanthine	2.11	0
		Adenosine	2.15	0
		2'_3'-CyclicCMP	2.57	0.0086
		Adenosine diphosphate ribose	2.61	0.026
		Adenosine monophosphate	2.87	0.0022
		Carnitine (3-hydroxy-C16:0)	3.25	0
		Carnitine (3-hydroxy-14:0)	3.42	0
		Guanosine monophosphate (GMP)	3.5	0.0196
		3-Hydroxycarnitine (18:1)	3.99	0.0468
		arg-ala	5.01	0.002
	1.5 > FC > 2	Lyso-PC (18:2)	0.56	0.0021
		Lyso-PC (18:1)	0.62	0.0059
		Lyso-PC (16:0)	0.64	0
		Choline	1.57	0
		Inosine	1.59	0
		Carnitine (14:0)	1.6	0
		Lyso-PC (18:0)	1.72	0
		Nicotinamide	1.79	0.0001
		Carnitine (16:0)	1.86	0
		Carnitine (16:1)	1.88	0
	60 min vs 5 min
	Fold change cutoff	Metabolite	FC (60 min / 5 min)	FDR
	FC > 2	Lyso-PC (18:2)	0.44	0
		Carnitine (16:1)	2.02	0
		hydroxydecanoic Acid (C10:0, -OH)	2.03	0.0462
		Nicotinamide	2.14	0
		Adenosine diphosphate ribose	2.26	0.045
		Carnitine (16:0)	2.37	0
		Eicosadienoic acid	2.46	0.0483
		Inosine	2.76	0
		Adenosine monophosphate	2.85	0.001
		Adenosine	2.89	0
		2'_3'-CyclicCMP	3.25	0.0003
		Hypoxanthine	3.27	0
		Carnitine (3-hydroxy-8:0)	3.27	0.0093
		Carnitine (3-hydroxy-14:0)	3.64	0
		3-Hydroxycarnitine (18:1)	3.64	0.045
		Guanosine monophosphate (GMP)	3.67	0.008
		Carnitine (3-hydroxy-C16:0)	3.68	0
		Hydroxyoctanoic acid (C8, -OH)	3.79	0.0162
		Pentose-phosphates	4.02	0.045
		arg-ala	4.04	0.0037
	1.5 > FC > 2	Lyso-PC (18:1)	0.53	0.0001
		Lyso-PC (16:0)	0.55	0
		Lyso-PE (20:4)	1.63	0.0013
		Lyso-PC (18:0)	1.74	0
		Carnitine (14:0)	1.75	0
		Choline	1.8	0
		Xanthine	1.88	0
	120 min vs 5 min
	Fold change cutoff	Metabolite	FC (120 min / 5 min)	FDR
	FC > 2	Lyso-PC (18:2)	0.22	0
		Lyso-PC (17:0)	0.29	0.0307
		Lyso-PC (16:0)	0.35	0
		Lyso-PC (18:1)	0.36	0
		Lyso-PC (22:4)	0.39	0
		CyclicADP-ribose	0.46	0.0131
		NAD+	0.46	0.0029
		Choline	2.14	0
		Adenosine diphosphate ribose	2.37	0.0262
		hydroxydecanoic Acid (C10:0, -OH)	2.47	0.0069
		Nicotinamide	2.5	0
		Carnitine (16:0)	2.96	0
		Adenosine monophosphate	3.04	0.0004
		Carnitine (3-hydroxy-8:0)	3.05	0.012
		Carnitine (3-hydroxy-14:0)	3.13	0
		3-hydroxyheptanoic acid	3.14	0.0346
		Carnitine (3-hydroxy-C16:0)	3.17	0
		Xanthine	3.51	0
		2'_3'-CyclicCMP	3.6	0.0001
		Uridine Monophosphate	3.61	0.0047
		Adenosine	3.87	0
		Eicosadienoic acid	3.98	0.0014
		Hydroxyoctanoic acid (C8, -OH)	4.51	0.0047
		Guanosine monophosphate (GMP)	4.67	0.0013
		Inosine	6.51	0
		Pentose-phosphates	6.95	0.0029
		tyrosylarginine	7.18	0.0002
		Hypoxanthine	8.47	0
		arg-ala	11.42	0
	1.5 > FC > 2	Platelet-activating factor	0.52	0
		Lyso-PE (18:0)	0.6	0
		Carnitine (14:0)	1.62	0
		Oleic acid	1.7	0.0449
		Carnitine (16:1)	1.85	0
		FA (8:0)	1.98	0.0307
	180 min vs 5 min
	Fold change cutoff	Metabolite	FC (180 min / 5 min)	FDR
	> 2	Lyso-PC (17:0)	0.11	0.0001
		Lyso-PC (18:2)	0.16	0
		(2R)-3-Sulfolactate	0.16	0.0421
		Guanosine triphosphate (GTP)	0.24	0.0497
		Lyso-PC (16:0)	0.3	0
		Lyso-PC (18:1)	0.31	0
		Lyso-PC (22:4)	0.34	0
		Platelet-activating factor	0.44	0
		Lactate	0.49	0.0358
		Choline	2.05	0
		Carnitine (3-hydroxy-14:0)	2.34	0.0009
		Carnitine (3-hydroxy-8:0)	2.54	0.0347
		Carnitine (16:0)	2.61	0
		Nicotinamide	2.88	0
		Adenosine diphosphate ribose	2.91	0.0046
		Carnitine (3-hydroxy-C16:0)	3.03	0
		Hydroxyoctanoic acid (C8, -OH)	3.24	0.0282
		Adenosine	3.73	0
		Eicosadienoic acid	3.81	0.0018
		Adenosine monophosphate	3.99	0
		2'_3'-CyclicCMP	4.47	0
		Xanthine	5.03	0
		Uridine Monophosphate	6.05	0.0001
		Guanosine monophosphate (GMP)	7.65	0
		tyrosylarginine	8.38	0.0001
		Inosine	8.6	0
		Acetyl-hexosamine-phosphate	8.62	0.0219
		Hypoxanthine	12.36	0
		Pentose-phosphates	14.04	0.0001
		arg-ala	16.22	0
	1.5 > FC > 2	CyclicADP-ribose	0.51	0.0282
		NAD+	0.51	0.0095
		Carnitine (18:0)	0.56	0.0005
		Lyso-PE (18:0)	0.56	0
		Carnitine (16:1)	1.54	0.0011
		Lyso-PC (18:0)	1.55	0
		3-hydroxybutyrylcarnitine	1.61	0
		Oleic acid	1.89	0.0164
	240 min vs 5 min
	Fold change cutoff	Metabolite	FC (240 min / 5 min	FDR
	FC > 2	Lyso-PC (17:0)	0.04	0
		(2R)-3-Sulfolactate	0.12	0.0189
		Lyso-PC (18:2)	0.13	0
		UTP	0.14	0.0413
		Guanosinetriphosphate(GTP)	0.16	0.0105
		Adenosine triphosphate (ATP)	0.18	0.0127
		Lyso-PC (18:1)	0.26	0
		Lyso-PC (22:4)	0.26	0
		Lyso-PC (16:0)	0.26	0
		Adenosine diphosphate (ADP)	0.28	0.0302
		Ornithine	0.29	0.0148
		CyclicADP-ribose	0.34	0.0005
		NAD+	0.35	0.0001
		Platelet-activating factor	0.42	0
		Guanosine	2.06	0.0215
		FA (8:0)	2.06	0.0162
		Oleic acid	2.08	0.0049
		Carnitine (3-hydroxy-14:0)	2.29	0.0012
		Choline	2.43	0
		Adenosine monophosphate	2.56	0.002
		hydroxydecanoic Acid (C10:0, -OH)	2.74	0.0023
		Carnitine (16:0)	2.97	0
		Nicotinamide	3.27	0
		Carnitine (3-hydroxy-C16:0)	3.31	0
		2'_3'-CyclicCMP	3.57	0.0001
		3-hydroxyheptanoic acid	3.59	0.0148
		Uridine Monophosphate	3.59	0.0043
		Carnitine (3-hydroxy-8:0)	3.67	0.0028
		Adenosine	4.38	0
		Guanosine monophosphate (GMP)	4.42	0.0017
		Hydroxyoctanoic acid (C8, -OH)	5.1	0.002
		Eicosadienoic acid	5.46	0.0001
		Xanthine	7.19	0
		Pentose-phosphates	8.41	0.0011
		tyrosylarginine	8.9	0
		Inosine	12.13	0
		arg-ala	13.13	0
		Hypoxanthine	18.33	0
	2 > FC > 1.5	Lyso-PE (18:0)	0.55	0
		Carnitine (18:0)	0.6	0.002
		FA (16:0)	1.51	0.0078
		Propionylcarnitine	1.53	0
		FA (18:0)	1.59	0.0467
		Stearic acid (C18:0)	1.59	0.0467
		FA (hydroxy-18:1)	1.67	0.0056
		3-hydroxybutyrylcarnitine	1.67	0
		FA (14:0)	1.94	0.0183
		Uridine	1.94	0
		Salicylic acid	1.95	0.043
