# Supplementary material for: Metabolomic profiling of rare cell populations isolated by flow cytometry from tissues
Source: eLife. 2021 Jan 20;10:e61980. doi: 10.7554/eLife.61980 (PMC7847306; doi:10.7554/eLife.61980)
Supplement: Figure 1—source data 7. — Metabolites enriched or depleted in whole bone marrow (WBM) cells isolated from cells suspended in phosphate buffered saline (PBS) versus Hank's Buffered Salt Solution (HBSS) (fold change >2 and false discovery rate [FDR] > 0.05). Correlation analysis: Spearman r = 0.960, y = 0.92 × +1759331. These metabolites were not significantly enriched in any metabolic pathway. Supplementary table 6b. Metabolites enriched or depleted in WBM cells isolated from cells suspended in PBS versus HBSS (fold change = 1.5–2 and FDR < 0.05). [file elife-61980-fig1-data7.xlsx]

## Sheet: Sheet1
	Figure 1 - source data 7
	Figure 1 – supplementary table 6a. Metabolites enriched or depleted in WBM cells isolated from cells suspended in PBS versus HBSS (fold change > 2 and FDR > 0.05). Correlation analysis: Spearman r = 0.960, y = 0.92x + 1759331. These metabolites were not significantly enriched in any metabolic pathway.
	Metabolite	FC (PBS/HBSS)	FDR
	Glucose	0.055	0
	6-Acetyl-D-glucose	0.342	0
	Deoxypentose monophosphates	0.37	0
	Acetylacrylate	0.421	0
	2-Mannosyl-3-phosphoglycerate	4.014	0.0164
	Figure 1 – supplementary table 6b. Metabolites enriched or depleted in WBM cells isolated from cells suspended in PBS versus HBSS (fold change = 1.5 to 2 and FDR < 0.05).
	Metabolite	FC (PBS/HBSS)	FDR
	Pentoses	0.7	0.0001
	Glycerylphosphorylcholine	0.77	0.011
	Glycerophosphorylethanolamine	0.81	0.0066
	L-Glutamic acid	1.07	0.0333
	PC (36:2)	1.08	0.0216
	PC (38:5)	1.13	0.0011
	PC (38:4)	1.16	0.0066
	PC (32:2)	1.17	0.0092
	Phosphoenolpyruvic acid	1.75	0
