# Supplementary material for: Metabolomic profiling of rare cell populations isolated by flow cytometry from tissues
Source: eLife. 2021 Jan 20;10:e61980. doi: 10.7554/eLife.61980 (PMC7847306; doi:10.7554/eLife.61980)
Supplement: Figure 1—source data 8. — These files contain the raw counts for each metabolite in each sample and the statistical comparisons between samples for each metabolite. [file elife-61980-fig1-data8.xlsx]

## Sheet: Summary Results
V1.7.1	Value			Group	Samples	Value-count-filtered Metabolites			Sample	Value-filtered Metabolites			Control	Treatment	Control_Only	Treatment_Only	Absent_in_Both	Present_in_Both	Up_in_Treatment	Down_in_Treatment	Significant	FDR Cutoff	FC_Cutoff
Samples	32			AML_Pipetted	8	234			AML_Pipetted_1	221			AML_Pipetted	AML_Sorted	16	1	336	218	9	33	42	0.01	2
Groups	4			AML_Sorted	8	219			AML_Pipetted_2	224			AML_Pipetted	ALL_Pipetted	27	7	330	207	35	58	93	0.01	2
Metabolites	571			ALL_Pipetted	8	214			AML_Pipetted_3	228			AML_Sorted	ALL_Sorted	21	10	342	198	29	53	82	0.01	2
Value-filtered Metabolites	247			ALL_Sorted	8	208			AML_Pipetted_4	222			ALL_Pipetted	ALL_Sorted	10	4	353	204	5	12	17	0.01	2
Value filter	0								AML_Pipetted_5	224			AML_Pipetted	AML_Sorted	16	1	336	218	10	33	43	0.05	2
Count filter	3								AML_Pipetted_6	228			AML_Pipetted	ALL_Pipetted	27	7	330	207	36	61	97	0.05	2
Group mean lower-bound	11.4890993073716								AML_Pipetted_7	229			AML_Sorted	ALL_Sorted	21	10	342	198	30	56	86	0.05	2
Adjusted p-value cutoff	0.05,0.01								AML_Pipetted_8	219			ALL_Pipetted	ALL_Sorted	10	4	353	204	5	14	19	0.05	2
Fold change cutoff	2								AML_Sorted_1	205
Normalization	RLE								AML_Sorted_2	212
Log2 transformation	Yes								AML_Sorted_3	203
Offset of log2 transformation	1								AML_Sorted_4	213
Statistical test method	glm								AML_Sorted_5	215
Data imputation method	half minimum								AML_Sorted_6	201
Formula for linear model	value~group+rep								AML_Sorted_7	209
Visualization	Yes								AML_Sorted_8	210
Y axis for volcano plot	adjusted p-value								ALL_Pipetted_1	206
Clustered samples	Yes								ALL_Pipetted_2	210
Clustered features	Yes								ALL_Pipetted_3	209
									ALL_Pipetted_4	204
									ALL_Pipetted_5	212
									ALL_Pipetted_6	204
									ALL_Pipetted_7	209
									ALL_Pipetted_8	195
									ALL_Sorted_1	197
									ALL_Sorted_2	191
									ALL_Sorted_3	202
									ALL_Sorted_4	198
									ALL_Sorted_5	210
									ALL_Sorted_6	202
									ALL_Sorted_7	201
									ALL_Sorted_8	210

## Sheet: Raw Data
Sample ID	AML_Pipetted_1	AML_Pipetted_2	AML_Pipetted_3	AML_Pipetted_4	AML_Pipetted_5	AML_Pipetted_6	AML_Pipetted_7	AML_Pipetted_8	AML_Sorted_1	AML_Sorted_2	AML_Sorted_3	AML_Sorted_4	AML_Sorted_5	AML_Sorted_6	AML_Sorted_7	AML_Sorted_8	ALL_Pipetted_1	ALL_Pipetted_2	ALL_Pipetted_3	ALL_Pipetted_4	ALL_Pipetted_5	ALL_Pipetted_6	ALL_Pipetted_7	ALL_Pipetted_8	ALL_Sorted_1	ALL_Sorted_2	ALL_Sorted_3	ALL_Sorted_4	ALL_Sorted_5	ALL_Sorted_6	ALL_Sorted_7	ALL_Sorted_8
GroupID	AML_Pipetted	AML_Pipetted	AML_Pipetted	AML_Pipetted	AML_Pipetted	AML_Pipetted	AML_Pipetted	AML_Pipetted	AML_Sorted	AML_Sorted	AML_Sorted	AML_Sorted	AML_Sorted	AML_Sorted	AML_Sorted	AML_Sorted	ALL_Pipetted	ALL_Pipetted	ALL_Pipetted	ALL_Pipetted	ALL_Pipetted	ALL_Pipetted	ALL_Pipetted	ALL_Pipetted	ALL_Sorted	ALL_Sorted	ALL_Sorted	ALL_Sorted	ALL_Sorted	ALL_Sorted	ALL_Sorted	ALL_Sorted
Metabolite
1-Aminocyclopropanecarboxylate	0	0	0	0	0	0	0	0	0	0	0	0	0	0	0	0	0	0	0	0	0	0	0	0	0	0	0	0	0	0	0	0
1-Hydroxy-2-naphthoate	0	0	0	0	0	0	0	0	0	0	0	0	0	0	0	0	0	0	0	0	0	0	0	0	0	0	0	0	0	0	0	0
1-Methyladenosine	0	0	0	0	0	0	0	0	0	0	0	0	0	0	0	0	0	0	0	0	0	0	0	0	0	0	0	0	0	0	0	0
1-Methylhistidine	877244	600762	1.05297e+06	582899	892167	908719	986897	500108	0	378910	449270	261651	386186	553960	310540	298770	298655	0	391859	300952	429835	308107	320291	0	296735	0	0	0	277175	362624	0	361818
1-Methylnicotinamide	0	0	0	0	0	0	0	0	0	0	0	0	0	0	0	0	0	0	0	0	0	0	0	0	0	0	0	0	0	0	0	0
1-Phenylethanol	4.06504e+07	4.06586e+07	3.61181e+07	4.03079e+07	3.02436e+07	3.42124e+07	3.38357e+07	2.05111e+07	3.57742e+07	4.20224e+07	3.45562e+07	4.75185e+07	3.57774e+07	2.95296e+07	3.89982e+07	3.63938e+07	4.15142e+07	3.05698e+07	3.68075e+07	3.93544e+07	3.64505e+07	3.58663e+07	3.46922e+07	2.10896e+07	5.54593e+07	3.69766e+07	4.60608e+07	3.48312e+07	3.70572e+07	4.17278e+07	5.65056e+07	5.29643e+07
1,3/ 2,3-Bisphosphoglycerate	0	0	0	0	0	0	0	0	0	0	0	0	0	0	0	0	0	0	0	0	0	0	0	0	0	0	0	0	0	0	0	0
2-(3-Carboxy-3-aminopropyl)-histidine	0	0	0	0	0	0	0	0	0	0	0	0	0	0	0	0	0	0	0	0	0	0	0	0	0	0	0	0	0	0	0	0
2-/3-Phosphoglycerate	46302.8	43296.1	97436.8	121871	113356	113646	97573.3	42758.5	0	21455.6	16721.7	29949.3	49559.4	79123.7	67594.2	70581.4	0	32812	35400.9	0	0	15637.2	14258.1	0	0	0	39176.2	0	0	0	0	32486.3
2-Aminophenol	0	0	0	0	0	0	0	0	0	0	0	0	0	0	0	0	0	0	0	0	0	0	0	0	0	0	0	0	0	0	0	0
2-Deoxyglucose	0	0	0	0	0	0	0	0	0	0	0	0	0	0	0	0	0	0	0	0	0	0	0	0	0	0	0	0	0	0	0	0
2-Hydroxy-4-(methylthio)butanoate	0	0	0	0	0	0	0	0	0	0	0	0	0	0	0	0	0	0	0	0	0	0	0	0	0	0	0	0	0	0	0	0
2-Hydroxybutyrate	1.31348e+06	581966	997089	670519	627587	837014	1.13754e+06	487489	758117	979785	920642	513626	682643	537506	0	715217	581809	0	1.00989e+06	700484	1.12316e+06	1.06539e+06	408095	516312	1.05793e+06	961626	738213	470492	465020	715603	1.02947e+06	609362
2-Hydroxyglutarate	6.23816e+06	5.56565e+06	4.73688e+06	5.05834e+06	4.97257e+06	5.55896e+06	6.41094e+06	3.73105e+06	3.00866e+06	3.56594e+06	3.62582e+06	3.77228e+06	2.87815e+06	4.74179e+06	3.49088e+06	2.6035e+06	1.99366e+06	3.89865e+06	3.75168e+06	3.56868e+06	3.68852e+06	3.30698e+06	2.84636e+06	3.25826e+06	4.67815e+06	1.75687e+06	3.20454e+06	3.12966e+06	3.29646e+06	2.83162e+06	3.09464e+06	3.35269e+06
2-Hydroxyphenylacetate	0	0	0	0	0	0	0	0	0	0	0	0	0	0	0	0	0	0	0	0	0	0	0	0	0	0	0	0	0	0	0	0
2-Mannosyl-3-phosphoglycerate	0	0	0	0	0	0	0	0	0	0	0	0	0	0	0	0	0	0	0	0	0	0	0	0	0	0	0	0	0	0	0	0
2-Methylmaleate	0	0	0	0	0	0	0	0	0	0	0	0	0	0	0	0	0	0	0	0	0	0	0	0	0	0	0	0	0	0	0	0
2-Quinolinecarboxylate	585387	639731	530718	459816	625802	549921	672571	295460	72059.2	176283	210507	209026	67899.3	159416	133063	57446.4	30512.6	0	31566	0	0	0	0	0	0	0	0	0	0	0	25050.4	0
2,3-Diaminopropionate	0	0	0	0	0	0	0	0	0	0	0	0	0	0	0	0	0	0	0	0	0	0	0	0	0	0	0	0	0	0	0	0
2,3-Dihydroxybenzoate	0	0	0	0	0	0	0	0	0	0	0	0	0	0	0	0	0	0	0	0	0	0	0	0	0	0	0	0	0	0	0	0
2,4-Dihydroxypteridine	0	0	0	0	0	0	0	0	0	0	0	0	0	0	0	0	0	0	0	0	0	0	0	0	0	0	0	0	0	0	0	0
2,5-Dihydroxybenzoate	0	0	0	0	0	0	0	0	0	0	0	0	0	0	0	0	0	0	0	0	0	0	0	0	0	0	0	0	0	0	0	0
2,5-Dimethylpyrazine	0	0	0	0	0	0	0	0	0	0	0	0	0	0	0	0	0	0	0	0	0	0	0	0	0	0	0	0	0	0	0	0
2,6-Dihydroxypyridine	0	0	0	0	0	0	0	0	0	0	0	0	0	0	0	0	0	0	0	0	0	0	0	0	0	0	0	0	0	0	0	0
2',4'-Dihydroxyacetophenone	3.89723e+06	8.81791e+06	3.957e+06	3.99725e+06	3.84635e+06	4.4794e+06	6.73933e+06	2.00301e+06	4.9008e+06	6.42964e+06	7.041e+06	4.31695e+06	6.62964e+06	6.2436e+06	5.57636e+06	4.65743e+06	6.5709e+06	6.52096e+06	4.73441e+06	5.45615e+06	3.78052e+06	4.56213e+06	4.21931e+06	2.68546e+06	6.57627e+06	6.70835e+06	4.33043e+06	4.05616e+06	3.89864e+06	4.46339e+06	6.64203e+06	5.46974e+06
3-(2-Hydroxyphenyl)propanoate	0	0	0	0	0	0	0	0	0	0	0	0	0	0	0	0	0	0	0	0	0	0	0	0	0	0	0	0	0	0	0	0
3-(4-Hydroxyphenyl)pyruvate	0	0	0	0	0	0	0	0	0	0	0	0	0	0	0	0	0	0	0	0	0	0	0	0	0	0	0	0	0	0	0	0
3-Amino-4-hydroxybenzoate	0	0	0	0	0	0	0	0	0	0	0	0	0	0	0	0	0	0	0	0	0	0	0	0	0	0	0	0	0	0	0	0
3-Amino-5-hydroxybenzoate	0	0	0	0	0	0	0	0	0	0	0	0	0	0	0	0	0	0	0	0	0	0	0	0	0	0	0	0	0	0	0	0
3-Dehydroshikimate	0	0	0	0	0	0	0	0	0	0	0	0	0	0	0	0	0	0	0	0	0	0	0	0	0	0	0	0	0	0	0	0
3-Hydroxy-3-methylglutaryl-CoA	0	0	0	0	0	0	0	0	0	0	0	0	0	0	0	0	0	0	0	0	0	0	0	0	0	0	0	0	0	0	0	0
3-Hydroxyanthranilate	0	0	0	0	0	0	0	0	0	0	0	0	0	0	0	0	0	0	0	0	0	0	0	0	0	0	0	0	0	0	0	0
3-Hydroxybenzoate	0	0	0	0	0	0	0	0	0	0	0	0	0	0	0	0	0	0	0	0	0	0	0	0	0	0	0	0	0	0	0	0
3-Hydroxybutyrate	0	0	0	0	0	0	0	0	0	0	0	0	0	0	0	0	0	0	0	0	0	0	0	0	0	0	0	0	0	0	0	0
3-Hydroxycarnitine (14:0)	345830	174092	76691.1	123001	155125	238058	130445	30251.8	88871.1	0	0	0	0	39796.6	0	0	0	0	0	0	0	0	0	0	50605.2	0	0	0	0	0	0	0
3-Hydroxycarnitine (16:0)	239893	415486	359059	312462	132862	149808	152834	0	0	52394.2	0	78200	0	0	0	0	0	0	0	0	0	0	0	0	0	0	0	0	64727.9	0	0	0
3-Hydroxycarnitine (18:1)	0	0	0	0	0	0	31911.2	75089.9	70771.8	0	0	0	0	0	0	0	0	0	0	0	0	0	28137.4	0	50089.9	0	0	0	0	0	0	0
3-Hydroxycarnitine (4:0)	581557	497811	854648	561667	380248	468377	582630	354739	136545	212276	147681	215660	200112	0	208101	0	0	0	0	0	0	0	0	0	0	0	0	0	0	0	0	0
3-Hydroxycarnitine (5:0)	268845	143746	131296	215143	255659	147147	136799	63135.4	0	0	95824.8	0	161951	65844.6	90663.8	0	0	0	0	0	0	0	0	0	0	0	0	0	0	0	0	0
3-Hydroxycarnitine (6:0)	759967	738121	854729	680498	897007	815141	861039	444605	310439	507887	434813	471113	451811	398013	405662	412452	0	0	28360.6	0	0	0	0	0	0	0	0	0	0	0	0	0
3-Hydroxycarnitine (8:0)	0	0	0	0	0	0	0	0	0	0	0	0	0	0	0	0	0	0	0	0	0	0	0	0	0	0	0	0	0	0	0	0
3-Hydroxymethylglutarate	1.05188e+07	9.08005e+06	1.01873e+07	9.13232e+06	9.15645e+06	9.57598e+06	1.05135e+07	7.12377e+06	6.53139e+06	6.32817e+06	5.44075e+06	5.8445e+06	5.62688e+06	5.60025e+06	5.28443e+06	5.19855e+06	5.16933e+06	5.26546e+06	5.77061e+06	5.44522e+06	5.24592e+06	4.71951e+06	5.19988e+06	4.50066e+06	5.24587e+06	4.25598e+06	4.67042e+06	4.58008e+06	4.77446e+06	4.66232e+06	4.19604e+06	4.75397e+06
3-Hydroxyphenylacetate	0	0	0	0	0	0	0	0	0	0	0	0	0	0	0	0	0	0	0	0	0	0	0	0	0	0	0	0	0	0	0	0
3-Hydroxypyruvate	595707	428430	369437	253379	225718	233688	416661	137913	544091	413741	420822	356931	413071	336991	349888	182756	469654	319772	507365	393072	362878	315459	300959	185136	928966	339876	446068	349179	442469	242959	345513	255843
3-Methoxy-4-hydroxymandelate	0	0	0	0	0	0	0	0	0	0	0	0	0	0	0	0	0	0	0	0	0	0	0	0	0	0	0	0	0	0	0	0
3-Methoxytyramine	0	0	0	0	0	0	0	0	0	0	0	0	0	0	0	0	0	0	0	0	0	0	0	0	0	0	0	0	0	0	0	0
3-Methoxytyrosine	0	0	0	0	0	0	0	0	0	0	0	0	0	0	0	0	0	0	0	0	0	0	0	0	0	0	0	0	0	0	0	0
3-Methyl-2-oxindole	0	0	0	0	0	0	0	0	0	0	0	0	0	0	0	0	0	0	0	0	0	0	0	0	0	0	0	0	0	0	0	0
3-Methyl-2-oxovalerate	0	0	0	0	0	0	0	0	0	0	0	0	0	0	0	0	0	0	0	0	0	0	0	0	0	0	0	0	0	0	0	0
3-Methyladenine	0	0	0	0	0	0	0	0	0	0	0	0	0	0	0	0	0	0	0	0	0	0	0	0	0	0	0	0	0	0	0	0
3-Methylcrotonyl-CoA	0	0	0	0	0	0	0	0	0	0	0	0	0	0	0	0	0	0	0	0	0	0	0	0	0	0	0	0	0	0	0	0
3-Methylhistamine	0	0	0	0	0	0	0	0	0	0	0	0	0	0	0	0	0	0	0	0	0	0	0	0	0	0	0	0	0	0	0	0
3-Nitrotyrosine	0	0	0	0	0	0	0	0	0	0	0	0	0	0	0	0	0	0	0	0	0	0	0	0	0	0	0	0	0	0	0	0
3-Sulfinoalanine	0	0	0	0	0	0	0	0	0	0	0	0	0	0	0	0	0	0	0	0	0	0	0	0	0	0	0	0	0	0	0	0
3,4 Dihydroxymandelate	0	0	0	0	0	0	0	0	0	0	0	0	0	0	0	0	0	0	0	0	0	0	0	0	0	0	0	0	0	0	0	0
3,4-Dihydroxybenzoate	0	0	0	0	0	0	0	0	0	0	0	0	0	0	0	0	0	0	0	0	0	0	0	0	0	0	0	0	0	0	0	0
3,4-Dihydroxyphenylacetate	0	0	0	0	0	0	0	0	0	0	0	0	0	0	0	0	0	0	0	0	0	0	0	0	0	0	0	0	0	0	0	0
3,4-Dihydroxyphenylglycol	0	0	0	0	0	0	0	0	0	0	0	0	0	0	0	0	0	0	0	0	0	0	0	0	0	0	0	0	0	0	0	0
3,5-Diiodothyronine	0	0	0	0	0	0	0	0	0	0	0	0	0	0	0	0	0	0	0	0	0	0	0	0	0	0	0	0	0	0	0	0
3,5-Diiodotyrosine	0	0	0	0	0	0	0	0	0	0	0	0	0	0	0	0	0	0	0	0	0	0	0	0	0	0	0	0	0	0	0	0
4-Acetamidobutanoate	0	0	0	0	0	0	0	0	0	0	0	0	0	0	0	0	0	0	0	0	0	0	0	0	0	0	0	0	0	0	0	0
4-Aminobenzoate	0	0	0	0	0	0	0	0	0	0	0	0	0	0	0	0	0	0	0	0	0	0	0	0	0	0	0	0	0	0	0	0
4-Coumarate	0	0	0	0	0	0	0	0	0	0	0	0	0	0	0	0	0	0	0	0	0	0	0	0	0	0	0	0	0	0	0	0
4-Guanidinobutanoate	2.5489e+06	2.09682e+06	2.22116e+06	2.4622e+06	2.24628e+06	2.57786e+06	2.60241e+06	2.43041e+06	1.61032e+06	3.67644e+06	1.6414e+06	1.85409e+06	1.3122e+06	1.43245e+06	1.37507e+06	1.19632e+06	1.78904e+06	2.47375e+06	2.10859e+06	2.62814e+06	2.56764e+06	1.87911e+06	2.63625e+06	1.63211e+06	2.46152e+06	2.18398e+06	2.04281e+06	2.02482e+06	2.05376e+06	2.18875e+06	1.97997e+06	2.19846e+06
4-Hydroxybenzoate	0	0	0	0	0	0	0	0	0	0	0	0	0	0	0	0	0	0	0	0	0	0	0	0	0	0	0	0	0	0	0	0
4-Hydroxyphenylglycine	0	0	0	0	0	0	0	0	0	0	0	0	0	0	0	0	0	0	0	0	0	0	0	0	0	0	0	0	0	0	0	0
4-Imidazoleacetate	0	0	0	0	0	0	0	0	0	0	0	0	0	0	0	0	0	0	0	0	0	0	0	0	0	0	0	0	0	0	0	0
4-Methylcatechol	0	0	0	0	0	0	0	0	0	0	0	0	0	0	0	0	0	0	0	0	0	0	0	0	0	0	0	0	0	0	0	0
4-Pyridoxate	331115	117257	137651	158488	169522	224431	201953	62630.8	300578	151093	341023	287175	174449	0	110419	238502	152103	101165	215501	185170	73969	0	136910	42946.9	0	0	99458.5	0	186035	454607	319299	484305
4-Quinolinecarboxylate	585387	639731	530718	459816	625802	549921	672571	295460	72059.2	176283	210507	209026	67899.3	159416	133063	57446.4	30512.6	0	31566	0	0	0	0	0	0	0	0	0	0	0	25050.4	0
4alpha-Hydroxyformyl-4beta-methyl-5alpha-cholest-8-en-3beta-ol	0	0	0	0	0	0	0	0	0	0	0	0	0	0	0	0	0	0	0	0	0	0	0	0	0	0	0	0	120416	229183	0	0
5-Aminolevulinate	3.81594e+07	4.61915e+07	4.39727e+07	3.92598e+07	4.00031e+07	3.88136e+07	3.60022e+07	6.74771e+07	1.92156e+07	1.9575e+07	2.03165e+07	2.0464e+07	1.8417e+07	1.97832e+07	1.90537e+07	2.00266e+07	1.83695e+07	2.2613e+07	1.92092e+07	2.27808e+07	1.99796e+07	2.34016e+07	2.07628e+07	4.82838e+07	2.18976e+07	2.00548e+07	1.93948e+07	1.98707e+07	1.99185e+07	1.72167e+07	2.01957e+07	2.02926e+07
5-Aminopentanoate	0	0	0	0	0	0	0	0	0	0	0	0	0	0	0	0	0	0	0	0	0	0	0	0	0	0	0	0	0	0	0	0
5-Hydroxyindoleacetate	0	0	0	0	0	0	0	0	0	0	0	0	0	0	0	0	0	0	0	0	0	0	0	0	0	0	0	0	0	0	0	0
5-Hydroxylysine	0	0	0	0	0	0	0	0	0	0	0	0	0	0	0	0	0	0	0	0	0	0	0	0	0	0	0	0	0	0	0	0
5-Hydroxytryptophan	0	0	0	0	0	0	0	0	0	0	0	0	0	0	0	0	0	0	0	0	0	0	0	0	0	0	0	0	0	0	0	0
5-Methylcytosine	0	0	0	0	0	0	0	0	0	0	0	0	0	0	0	0	0	0	0	0	0	0	0	0	0	0	0	0	0	0	0	0
5,6 Dimethylbenzimidazole	638187	552473	976511	510047	652992	782302	1.2758e+06	555453	0	1.00902e+06	986824	414765	804127	1.98076e+06	938394	1.00882e+06	1.62211e+06	1.3499e+06	983064	1.42686e+06	744438	1.28152e+06	1.11967e+06	612374	493315	687634	2.18636e+06	590835	208514	1.35246e+06	698616	1.01553e+06
6-Carboxyhexanoate	0	0	0	0	0	0	0	0	0	0	0	0	0	0	0	0	0	0	0	0	0	0	0	0	0	0	0	0	0	0	0	0
6-Hydroxynicotinate	0	0	0	0	0	0	0	0	0	0	0	0	0	0	0	0	0	0	0	0	0	0	0	0	0	0	0	0	0	0	0	0
6-Phosphogluconate	0	0	0	0	0	0	0	0	0	0	0	0	0	0	0	0	0	0	0	0	0	0	0	0	0	0	0	0	0	0	0	0
6-Phosphonogluconolactone	0	0	0	0	0	0	0	0	0	0	0	0	0	0	0	0	0	0	0	0	0	0	0	0	0	0	0	0	0	0	0	0
7-Methylxanthine	0	0	0	0	0	0	0	0	0	0	0	0	0	0	0	0	0	0	0	0	0	0	0	0	0	0	0	0	0	0	0	0
Acetoacetate	0	0	0	0	0	0	0	0	0	0	0	0	0	0	0	0	0	0	0	0	0	0	0	0	0	0	0	0	0	0	0	0
Acetoin	0	0	0	0	0	0	0	0	0	0	0	0	0	0	0	0	0	0	0	0	0	0	0	0	0	0	0	0	0	0	0	0
Acetyl-CoA	0	0	0	0	0	0	0	0	0	0	0	0	0	0	0	0	0	0	0	0	0	0	0	0	0	0	0	0	0	0	0	0
Acetylacrylate	0	0	0	0	0	0	0	0	0	0	0	0	0	0	0	0	0	0	0	0	0	0	0	0	0	0	0	0	0	0	0	0
Acetylaminoadipate	1.57768e+06	1.20023e+06	1.43012e+06	1.4056e+06	1.48995e+06	1.47762e+06	1.41671e+06	1.02419e+06	436914	694556	652309	412401	730126	577750	568995	581696	2.37378e+06	2.58521e+06	2.7725e+06	2.32603e+06	2.70997e+06	2.33731e+06	2.53805e+06	2.22736e+06	1.93137e+06	1.54062e+06	1.64207e+06	1.58333e+06	1.98508e+06	1.77552e+06	1.50262e+06	1.80213e+06
Acetylcarnitine	1.35321e+08	1.1897e+08	1.31575e+08	1.22254e+08	1.26792e+08	1.19742e+08	1.2813e+08	7.05418e+07	4.8281e+07	5.19143e+07	4.82064e+07	4.98832e+07	4.71724e+07	4.7492e+07	4.8623e+07	4.8104e+07	3.01797e+06	3.1151e+06	2.35136e+06	2.27809e+06	2.08467e+06	2.56006e+06	2.17801e+06	1.49903e+06	1.73225e+06	1.72901e+06	1.29225e+06	1.47261e+06	1.99022e+06	2.48627e+06	1.21729e+06	1.77337e+06
Acetylcholine	1.37454e+07	1.18823e+07	1.32827e+07	1.29862e+07	1.36148e+07	1.32704e+07	1.28607e+07	7.38732e+06	5.42192e+06	5.01585e+06	4.89894e+06	5.364e+06	5.25729e+06	5.54798e+06	4.99722e+06	4.51376e+06	8.88561e+06	8.72386e+06	8.95322e+06	7.64874e+06	8.61783e+06	7.85676e+06	7.8394e+06	5.07906e+06	6.38376e+06	5.84464e+06	6.57369e+06	5.68029e+06	6.51234e+06	7.17691e+06	6.36037e+06	6.1271e+06
Adenosine	67156.4	989907	1.10917e+06	161968	427109	1.77758e+06	1.93845e+06	456745	25034.9	0	65694.9	118117	1.33598e+06	218171	1.42442e+06	1.68834e+06	339335	972686	84488.4	154896	532410	1.79912e+06	1.38158e+06	1.44207e+06	189283	216519	137454	147618	1.4017e+06	1.4403e+06	392626	1.81604e+06
Adenosine cyclic phosphate	0	0	0	0	0	0	0	0	0	0	0	0	0	0	0	0	0	0	0	0	0	0	0	0	0	0	0	0	0	0	0	0
Adenosine diphosphate	1.28554e+07	1.0012e+07	1.36137e+07	1.18019e+07	1.28772e+07	1.29662e+07	1.24069e+07	1.12253e+07	6.8387e+06	7.96686e+06	7.95703e+06	9.31986e+06	9.30769e+06	9.93164e+06	9.37844e+06	1.01569e+07	6.28699e+06	5.9196e+06	6.11028e+06	5.6047e+06	7.13511e+06	5.48048e+06	5.86684e+06	5.11859e+06	6.98352e+06	8.22802e+06	9.06596e+06	7.97459e+06	8.96982e+06	8.50983e+06	6.91078e+06	8.1608e+06
Adenosine diphosphate ribose	0	0	0	0	0	19380.9	0	0	44798.6	16640.6	0	0	0	17609.1	0	0	471125	574761	640134	450789	654506	605855	666544	517448	143008	114077	222044	83572.9	145056	189824	156635	232010
Adenosine monophosphate	3.93298e+06	3.61196e+06	3.92149e+06	3.39626e+06	3.90098e+06	2.77445e+06	3.15001e+06	1.81266e+06	1.56335e+06	3.85869e+06	3.75441e+06	4.83539e+06	3.96623e+06	4.17066e+06	3.48499e+06	4.0488e+06	1.57378e+06	1.28605e+06	1.62844e+06	1.09206e+06	1.44304e+06	1.12007e+06	1.29954e+06	748186	2.65981e+06	3.79858e+06	3.05778e+06	2.59473e+06	3.07683e+06	2.72804e+06	2.12527e+06	2.37729e+06
Adenosine triphosphate	8.59918e+06	6.93802e+06	1.17509e+07	1.02084e+07	1.20753e+07	1.18675e+07	9.9846e+06	1.02796e+07	1.76476e+06	2.42966e+06	3.25895e+06	3.31243e+06	3.21474e+06	3.29851e+06	4.55162e+06	3.51451e+06	6.06764e+06	4.98475e+06	5.62925e+06	4.86497e+06	5.54365e+06	5.13955e+06	7.4584e+06	4.81638e+06	2.11183e+06	2.20795e+06	3.29742e+06	2.8639e+06	3.71977e+06	4.07498e+06	3.92803e+06	4.25823e+06
Adenylsuccinate	0	0	0	0	0	0	0	0	0	0	0	0	0	0	0	0	0	0	0	0	0	0	0	0	0	0	0	0	0	0	0	0
Adipate	0	0	0	0	0	0	0	0	0	0	0	0	0	0	0	0	0	0	0	0	0	0	0	0	0	0	0	0	0	0	0	0
ADP-glucose	0	0	0	0	0	0	0	0	0	0	0	0	0	0	0	0	0	0	0	0	0	0	0	0	0	0	0	0	0	0	0	0
ADP-ribose	0	0	35891.4	0	0	33462.7	0	0	0	0	0	0	0	0	30984.8	0	857140	1.16746e+06	841443	836478	1.09598e+06	900072	974930	830233	189484	97281.9	213200	80935.9	251657	197597	47868.7	322754
ADP-ribose phosphate	0	0	0	0	0	0	0	0	0	0	0	0	0	0	0	0	0	0	0	0	0	0	0	0	0	0	0	0	0	0	0	0
Agmatine sulfate	0	0	0	0	0	0	0	0	0	0	0	0	0	0	0	0	0	0	0	0	0	0	0	0	0	0	0	0	0	0	0	0
AICAR	0	0	0	0	0	0	0	0	0	0	0	0	0	0	0	0	0	0	0	0	0	0	0	0	0	0	0	0	0	0	0	0
Ala-Leu	0	14364.2	18573.6	0	0	0	0	0	0	0	0	0	15505.5	0	10054.3	0	15584.8	14966.8	0	0	0	0	0	0	0	0	0	0	0	0	29364	9957.25
Ala-Tyr	0	0	0	0	0	0	0	0	0	0	0	0	0	0	0	0	0	0	0	0	0	0	0	0	0	0	0	0	0	0	0	0
Alanine	5.06879e+06	5.33982e+06	6.67719e+06	5.3374e+06	5.70632e+06	4.0674e+06	3.88784e+06	2.87521e+06	2.36785e+06	3.88794e+06	3.74651e+06	3.54448e+06	3.36305e+06	3.86922e+06	3.25071e+06	2.70033e+06	6.46804e+06	5.79249e+06	8.90645e+06	7.84248e+06	5.71041e+06	5.41349e+06	6.33032e+06	4.39532e+06	6.01698e+06	5.70527e+06	5.20236e+06	7.33624e+06	7.32731e+06	7.35819e+06	6.23183e+06	4.39521e+06
Allantoin	0	103055	109654	105918	66327.6	149394	237967	66359.2	0	0	0	0	0	0	0	66259.2	0	0	0	0	0	0	0	0	0	0	0	0	0	0	104604	0
Allothreonine	0	0	0	0	0	0	0	0	0	0	0	0	0	0	0	0	0	0	0	0	0	0	0	0	0	0	0	0	0	0	0	0
alpha-Ketoglutarate	1.09306e+06	700817	619028	740154	430416	760737	474893	539511	627669	706672	518623	438050	550144	432027	0	489901	0	210315	239777	106699	0	381329	0	139937	392727	0	0	254909	324437	327031	151479	511564
Aminoadipate	0	0	0	0	0	0	0	0	0	0	0	0	0	0	0	0	0	0	0	0	0	0	0	0	0	0	0	0	0	0	0	0
Aminocaprylate	0	0	0	0	0	0	0	0	0	0	0	0	0	0	0	0	0	0	0	0	0	0	0	0	0	0	0	0	0	0	0	0
Aminoisobutanoate	0	0	0	0	0	0	0	0	0	0	0	0	0	0	0	0	0	0	0	0	0	0	0	0	0	0	0	0	0	0	0	0
Aniline-2-sulfonate	0	0	0	0	0	0	0	0	0	0	0	0	0	0	0	0	0	0	0	0	0	0	0	0	0	0	0	0	0	0	0	0
Anserine	0	0	0	0	0	0	0	0	0	0	0	0	0	0	0	0	0	0	0	0	0	0	0	0	0	0	0	0	0	0	0	0
Anthranilate	0	0	0	0	0	0	0	0	0	0	0	0	0	0	0	0	0	0	0	0	0	0	0	0	0	0	0	0	0	0	0	0
Arg-Ala	0	0	0	0	0	0	0	0	0	0	0	0	0	0	0	0	0	0	0	0	0	0	0	0	0	0	0	0	0	0	0	0
Arginine	2.16584e+08	1.8667e+08	1.96587e+08	1.88798e+08	1.99901e+08	1.97086e+08	2.11708e+08	1.35478e+08	6.47194e+07	6.34219e+07	5.06212e+07	5.38934e+07	5.14002e+07	5.40809e+07	5.3305e+07	5.97352e+07	1.62901e+08	1.57487e+08	1.61464e+08	1.45543e+08	1.62515e+08	1.55237e+08	1.65698e+08	1.15113e+08	1.02658e+08	8.95946e+07	9.15115e+07	9.40939e+07	1.01453e+08	1.14103e+08	9.71724e+07	1.10249e+08
Argininosuccinate	678788	588778	644578	766996	699306	838585	689526	713821	38716.3	0	0	0	0	0	0	0	623015	820908	717849	598545	914784	552303	799982	719528	481643	304256	285121	558941	595617	604402	343853	483750
Asp-Pro	0	0	0	0	0	0	0	0	0	0	0	0	0	0	0	0	0	0	0	0	0	0	0	0	0	0	0	0	0	0	0	0
Asparagine	1.76986e+07	1.56774e+07	1.73883e+07	1.60822e+07	2.54301e+07	1.74122e+07	1.72656e+07	9.74847e+06	5.65129e+06	5.60805e+06	6.10369e+06	7.64742e+06	6.53398e+06	5.88482e+06	5.76524e+06	5.92626e+06	9.83398e+06	1.02148e+07	1.15552e+07	9.59629e+06	1.04179e+07	9.62099e+06	1.05258e+07	6.30696e+06	6.82086e+06	6.61116e+06	7.84563e+06	7.80259e+06	7.67732e+06	9.08803e+06	6.50092e+06	7.4764e+06
Aspartate	4.70298e+07	3.88449e+07	4.76376e+07	4.32346e+07	4.67603e+07	4.56762e+07	4.63185e+07	2.95219e+07	1.50226e+07	1.5403e+07	1.62193e+07	1.73231e+07	1.61763e+07	1.77793e+07	1.55462e+07	1.70833e+07	7.47853e+07	7.97707e+07	9.39374e+07	7.43313e+07	9.06228e+07	7.57905e+07	8.38658e+07	5.68406e+07	5.67216e+07	5.06526e+07	5.58844e+07	5.89592e+07	6.16322e+07	6.98959e+07	5.44272e+07	6.23034e+07
Aspartylglycosamine	0	0	0	0	0	0	0	0	0	0	0	0	0	0	0	0	0	0	0	0	0	0	0	0	0	0	0	0	0	0	0	0
Azelate	1.28476e+06	1.48043e+06	917187	1.44029e+06	1.86451e+06	1.18748e+06	2.96427e+06	2.04627e+06	6.02384e+06	6.40612e+06	2.47521e+06	2.08699e+06	1.99647e+06	1.33651e+06	1.51945e+06	1.94963e+06	1.46532e+06	1.40816e+06	1.14494e+06	1.01971e+06	1.17407e+06	2.32397e+06	1.89018e+06	2.67269e+06	1.52464e+06	1.46578e+06	1.55692e+06	1.47872e+06	1.48977e+06	1.82477e+06	1.42764e+06	1.70563e+06
beta-Alanine	0	0	0	0	0	0	0	0	0	0	0	0	0	0	0	0	0	0	0	0	0	0	0	0	0	0	0	0	0	0	0	0
beta-Glycerophosphate	93123.7	71998.4	77570.5	104604	83588.3	169234	163805	81196.3	23070.3	42200.4	15560.9	0	33890.7	18332.7	32063.8	22030.5	1.78592e+06	1.93724e+06	2.3818e+06	1.68336e+06	2.03494e+06	1.7197e+06	1.88414e+06	1.40286e+06	948243	1.0717e+06	1.06584e+06	1.10456e+06	1.15129e+06	1.37467e+06	1.05573e+06	1.23278e+06
Betaine	0	0	0	0	0	0	0	0	0	0	0	0	0	0	0	0	0	0	0	0	0	0	0	0	0	0	0	0	0	0	0	0
Biliverdin	0	0	0	0	0	0	0	0	0	0	0	0	0	0	0	0	0	0	0	0	0	0	0	0	0	0	0	0	0	0	0	0
Biotin	0	0	0	0	0	0	0	0	0	0	0	0	0	0	0	0	0	0	0	0	0	0	0	0	0	0	0	0	0	0	0	0
Biotin amide	0	0	0	0	0	0	0	0	0	0	0	0	0	0	0	0	0	0	0	0	0	0	0	0	0	0	0	0	0	0	0	0
Butanoate	0	0	0	0	0	0	0	0	0	0	0	0	0	0	0	0	0	0	0	0	0	0	0	0	0	0	0	0	0	0	0	0
Butyryl-CoA	0	0	0	0	0	0	0	0	0	0	0	0	0	0	0	0	0	0	0	0	0	0	0	0	0	0	0	0	0	0	0	0
Caffeate	0	0	0	0	0	0	0	0	0	0	0	0	0	0	0	0	0	0	0	0	0	0	0	0	0	0	0	0	0	0	0	0
Carnitinamide	4.32273e+06	3.38928e+06	3.95442e+06	3.7679e+06	4.26586e+06	4.14425e+06	3.95042e+06	2.44106e+06	1.35788e+06	1.28577e+06	1.25539e+06	1.19759e+06	1.24236e+06	1.31789e+06	1.31246e+06	1.14796e+06	174313	213918	334699	188352	358130	196041	342044	0	0	103045	110624	109643	133558	0	0	0
Carnitine	1.08982e+07	9.42379e+06	1.01553e+07	1.05006e+07	9.8713e+06	9.607e+06	1.04634e+07	5.77499e+06	4.81983e+06	5.26414e+06	3.90785e+06	4.8637e+06	4.54131e+06	4.46432e+06	4.62279e+06	4.37746e+06	2.34522e+06	2.27252e+06	1.50731e+06	1.65431e+06	1.78321e+06	1.71124e+06	1.64608e+06	1.27911e+06	1.8809e+06	1.54766e+06	1.22211e+06	1.40079e+06	1.55781e+06	2.05269e+06	1.12945e+06	1.47374e+06
Carnitine (12:0)	180817	93672.6	181283	123510	0	44453.1	159690	0	98549.5	53855	0	50764.5	0	87914.1	22235.1	122048	48408.8	0	28526	0	0	0	0	0	0	0	48296.6	0	0	0	0	0
Carnitine (14:0)	3.11517e+06	3.31038e+06	2.91749e+06	3.1352e+06	3.25786e+06	3.23162e+06	3.24337e+06	1.16006e+06	1.42935e+06	921121	1.15708e+06	1.3904e+06	1.27885e+06	1.02186e+06	991498	1.04711e+06	0	43766.8	44663.8	0	41921.2	0	0	0	0	0	0	0	71388.5	96812	0	42519.1
Carnitine (16:0)	2.24474e+07	2.05938e+07	2.01891e+07	1.94012e+07	1.94997e+07	1.99171e+07	1.83009e+07	8.95506e+06	7.33917e+06	6.64174e+06	6.27951e+06	6.3432e+06	5.34524e+06	5.30829e+06	5.64324e+06	5.67647e+06	3.70118e+06	3.69148e+06	3.20981e+06	2.51667e+06	2.94797e+06	3.08804e+06	2.91469e+06	1.40011e+06	1.82811e+06	1.83269e+06	1.11765e+06	1.30768e+06	1.47866e+06	1.28971e+06	918414	720967
Carnitine (16:1)	3.17066e+06	2.27645e+06	2.63052e+06	2.50471e+06	2.71843e+06	2.42889e+06	2.61637e+06	1.1552e+06	631333	273989	88616.5	278059	391522	278442	191634	70368.5	0	0	0	0	0	48636.9	63588.2	30862.3	0	0	63552.6	48086.9	0	0	0	0
Carnitine (17:0)	0	0	0	113253	218993	117287	0	57403.1	75800.3	165055	0	139805	113413	118825	0	0	0	0	0	0	0	0	0	33911.7	0	0	0	0	0	0	0	74820.9
Carnitine (18:0)	1.00743e+06	1.36327e+06	990965	972069	999541	1.21383e+06	737094	400134	1.0032e+06	1.12053e+06	1.22669e+06	950880	1.00089e+06	952596	1.41736e+06	1.15076e+06	0	63753	0	0	82091.4	0	0	0	0	0	0	0	0	0	0	86832
Carnitine (18:1)	4.21975e+06	3.59316e+06	3.54365e+06	3.58072e+06	4.1598e+06	3.54832e+06	3.30327e+06	1.83461e+06	1.94056e+06	1.45386e+06	1.84968e+06	1.38179e+06	881468	1.2908e+06	1.52908e+06	1.74262e+06	71901	44781.3	0	0	80316.8	0	64872.6	0	0	0	0	85221.7	0	0	0	0
Carnitine (20:0)	0	0	0	0	0	0	0	0	0	0	0	0	0	0	0	0	0	0	0	0	0	0	0	0	0	0	0	0	0	0	0	0
Carnitine (3:0)	9.4643e+06	9.17706e+06	9.16306e+06	8.74326e+06	9.06943e+06	8.69022e+06	9.01156e+06	4.26131e+06	4.98052e+06	5.83585e+06	5.89929e+06	6.40345e+06	6.34792e+06	5.72055e+06	6.41946e+06	5.77923e+06	644289	873415	352867	320627	432021	543045	442850	309174	308825	510035	271832	0	462231	501296	404731	360691
Carnitine (4:0)	1.27066e+06	1.2832e+06	1.32727e+06	1.26355e+06	1.27155e+06	1.40606e+06	1.69139e+06	594770	677113	808688	504547	427305	841454	364661	597368	840745	501837	703089	421365	317804	402763	825270	759154	298067	251024	336032	198955	220303	577500	481481	111465	311990
Carnitine (5:0)	2.91082e+06	2.49983e+06	2.71581e+06	2.19611e+06	2.77741e+06	2.50825e+06	2.76797e+06	1.37158e+06	710663	901418	909604	834831	1.20019e+06	642956	998449	728023	0	0	0	0	0	0	0	0	0	0	0	0	0	0	0	0
Carnitine (6:0)	0	0	0	0	0	0	0	0	0	0	0	0	0	0	0	0	0	0	0	0	0	0	0	0	0	0	0	0	0	0	0	0
Carnitine (8:0)	0	0	0	0	0	0	0	0	0	0	0	0	0	0	0	0	0	0	0	0	0	0	0	0	0	0	0	0	0	0	0	0
Carnitine (glutaryl)	0	0	0	0	0	0	0	0	0	0	0	0	0	0	0	0	0	0	0	0	0	0	0	0	0	0	0	0	0	0	0	0
Carnosine	34826.6	0	0	0	29821.6	0	0	0	0	0	0	0	0	0	0	0	0	0	0	0	0	39230	0	0	0	27513.1	0	30310.4	0	0	0	0
CDP-ethanolamine	2.48811e+06	2.01316e+06	2.40257e+06	2.30675e+06	2.43608e+06	2.45248e+06	2.26641e+06	1.74167e+06	841656	883450	930781	966997	852192	924542	967945	966255	821185	862201	897444	797760	839118	732208	910996	716332	457322	522713	523788	610160	691667	695961	543120	718470
Cellobiose	0	0	62657.2	0	0	20023.8	299443	22805.5	0	282634	0	195414	49482.1	0	0	0	0	18378.6	0	86271	66841.6	0	532012	0	150061	0	306688	26840.9	67533.4	221991	0	51916.8
Cholate	0	0	0	0	0	0	0	0	0	0	0	0	0	0	0	0	0	0	0	0	0	0	0	0	0	0	0	0	0	0	0	0
Choline	1.37551e+08	1.21834e+08	1.26714e+08	4.7809e+07	1.2304e+08	9.24261e+07	1.03928e+08	3.17104e+07	6.22154e+07	6.50777e+07	3.17405e+07	5.61941e+07	4.58915e+07	5.76313e+07	4.35081e+07	4.73409e+07	1.07883e+08	9.92405e+07	1.07152e+08	8.71011e+07	8.00842e+07	5.79097e+07	6.64997e+07	2.65668e+07	9.69424e+07	8.79722e+07	8.19253e+07	9.18933e+07	6.41433e+07	5.61894e+07	8.66095e+07	8.61796e+07
Ciliatine	0	0	0	0	0	0	0	0	0	0	0	0	0	0	0	0	0	0	0	0	0	0	0	0	0	0	0	0	0	0	0	0
cis-4-Hydroxyproline	3.81594e+07	4.61915e+07	4.39727e+07	3.92598e+07	4.00031e+07	3.88136e+07	3.60022e+07	6.74771e+07	1.92156e+07	1.9575e+07	2.03165e+07	2.0464e+07	1.8417e+07	1.97832e+07	1.90537e+07	2.00266e+07	1.83695e+07	2.2613e+07	1.92092e+07	2.27808e+07	1.99796e+07	2.34016e+07	2.07628e+07	4.82838e+07	2.18976e+07	2.00548e+07	1.93948e+07	1.98707e+07	1.99185e+07	1.72167e+07	2.01957e+07	2.02926e+07
Citicoline	2.19931e+06	1.94205e+06	2.31284e+06	2.17526e+06	2.32865e+06	2.65613e+06	2.35295e+06	1.41058e+06	533804	625506	885966	1.00988e+06	801947	1.04664e+06	916796	973687	1.49602e+06	1.33001e+06	1.64543e+06	1.42069e+06	1.62255e+06	1.34006e+06	1.66733e+06	1.05133e+06	968219	1.13867e+06	907172	931219	1.16964e+06	1.15529e+06	957507	1.17328e+06
Citramalate	7.26078e+06	7.21389e+06	4.73688e+06	5.05834e+06	4.97257e+06	8.22646e+06	6.41094e+06	3.73105e+06	3.00866e+06	3.56594e+06	4.18802e+06	4.77458e+06	2.87815e+06	5.38368e+06	4.09383e+06	2.6035e+06	1.99366e+06	3.89865e+06	3.75168e+06	3.56868e+06	3.68852e+06	3.30698e+06	2.84636e+06	3.25826e+06	5.88068e+06	1.75687e+06	3.20454e+06	3.12966e+06	3.29646e+06	2.83162e+06	3.66516e+06	3.35269e+06
Citrate/Isocitrate	0	0	0	0	0	0	0	0	0	0	0	0	0	0	0	0	0	0	0	0	0	0	0	0	0	0	0	0	0	0	0	0
Citrulline	479908	667331	402729	511741	380581	454138	581383	270366	144541	518064	83082.8	355686	151265	194709	275450	297199	344310	316405	336846	285293	199010	379589	255389	63709.7	151541	132804	95276.6	226354	387470	406817	259810	505485
CMP-2-aminoethylphosphonate	241865	164289	312792	271639	242198	272616	253959	231495	21874.1	15101.5	94100.3	128477	57308.5	61246.5	34257	32500.4	0	78171.6	79385	39215.8	16860.8	40026.5	0	32262.1	42817.3	19377.2	15760.2	0	17189.7	13957.7	30185.8	64347.9
Cortexolone	0	0	0	0	0	0	0	0	0	0	0	0	0	0	0	0	0	0	0	0	0	0	0	0	0	0	0	0	0	0	0	0
Cortisol	0	0	0	0	0	0	0	0	0	0	0	0	0	0	0	0	0	0	0	0	0	0	0	0	0	0	0	0	0	0	0	0
Cortisol 21-acetate	0	264852	171041	0	0	0	148737	0	0	287144	139533	0	141883	0	0	165781	266377	156473	0	0	446557	177818	429056	0	0	391054	152753	112886	0	206783	0	320823
Creatine	2.64689e+08	2.68028e+08	2.79038e+08	2.71631e+08	2.60112e+08	2.51353e+08	2.49587e+08	3.09974e+08	1.21004e+08	1.35645e+08	1.44033e+08	1.44252e+08	1.36181e+08	1.31553e+08	1.28636e+08	1.3414e+08	3.64081e+07	4.0173e+07	3.90574e+07	3.87419e+07	3.77436e+07	3.90196e+07	3.58647e+07	5.33204e+07	3.05958e+07	3.20879e+07	3.05108e+07	2.97314e+07	3.07589e+07	2.99225e+07	3.04458e+07	2.9898e+07
Creatinine	2.05313e+07	2.03577e+07	2.05449e+07	1.71149e+07	1.91643e+07	1.87894e+07	1.88921e+07	8.25197e+06	5.49567e+06	1.04069e+07	6.77677e+06	8.41088e+06	9.52148e+06	6.58238e+06	8.90645e+06	9.51417e+06	1.05262e+07	1.08912e+07	9.04394e+06	7.89568e+06	8.34732e+06	1.01547e+07	8.52509e+06	5.42148e+06	6.54428e+06	7.07962e+06	8.15598e+06	5.88106e+06	7.55537e+06	1.0339e+07	5.93577e+06	7.74541e+06
Cyclic ADP-ribose	5.31356e+06	4.2309e+06	4.85292e+06	5.0279e+06	5.31503e+06	5.06659e+06	5.03579e+06	3.79273e+06	1.95719e+06	1.89109e+06	2.0505e+06	2.14974e+06	2.05571e+06	2.33372e+06	2.05478e+06	2.10129e+06	1.68101e+06	1.42732e+06	1.83641e+06	1.32146e+06	1.54295e+06	1.50375e+06	1.74455e+06	1.32807e+06	1.004e+06	1.22052e+06	1.09752e+06	1.11487e+06	1.29502e+06	1.41062e+06	1.17937e+06	1.31035e+06
Cyclic GMP	0	0	0	0	0	0	0	0	0	0	0	0	0	0	0	0	0	0	0	0	0	0	0	0	0	0	0	0	0	0	0	0
Cys-Gly	165648	129483	63934.8	62289.3	86093.8	78632.1	81438.4	88687.8	66888.9	0	0	75946.4	43911	0	46702.2	33704.8	297250	437324	343534	242506	469091	206258	241318	210337	169564	38557.4	202638	275074	219595	220319	141831	138280
Cystathionine	86795.8	111200	0	139576	161885	64272.4	207659	80140.7	0	0	0	0	0	0	0	0	0	0	0	0	0	0	0	0	0	0	0	0	0	0	0	0
Cysteate	0	0	0	0	0	0	0	0	0	0	0	0	0	0	0	0	0	0	0	0	0	0	0	0	0	0	0	0	0	0	0	0
Cystine	0	0	0	0	0	0	0	0	0	0	0	0	0	0	0	0	0	0	0	0	0	0	0	0	0	0	0	0	0	0	0	0
Cytidine	0	0	0	0	0	0	0	0	0	0	0	0	0	0	0	0	0	0	0	0	0	0	0	0	0	0	0	0	0	0	0	0
Cytidine cyclic phosphate	0	0	0	0	0	0	0	0	0	0	0	0	0	0	0	0	0	0	0	0	0	0	0	0	0	0	0	0	0	0	0	0
Cytidine diphosphate	139888	56517.2	268350	141017	281711	228904	314796	208281	0	37614.6	58387.2	96219.5	35737.2	119964	128537	109518	102059	95457.7	113725	194080	156813	160571	66710.5	143473	183986	164762	126562	141639	249510	210681	184813	261762
Cytidine monophosphate	24699.5	28070.2	46300.3	0	15804.5	19679.6	0	0	0	0	0	20746.9	75331.1	70155.8	18681.1	74177.7	17925.2	16457	0	27598.3	44040	0	28449.6	0	63681.6	95812.7	19377.9	0	31157.2	34615.1	67943.7	77992.2
Cytosine	0	0	0	0	0	0	0	0	0	0	0	0	0	0	0	0	0	0	0	0	0	0	0	0	0	0	0	0	0	0	0	0
Decanoate	3.02311e+07	2.12397e+07	3.52564e+07	2.75216e+07	3.80718e+07	3.79478e+07	2.04227e+07	1.32219e+07	5.87517e+07	5.44729e+07	3.13555e+07	2.70788e+07	4.05734e+07	2.90716e+07	3.32476e+07	3.75541e+07	2.60967e+07	2.64897e+07	1.94412e+07	3.49581e+07	2.83635e+07	2.35585e+07	2.56583e+07	1.36138e+07	6.11269e+07	2.88692e+07	2.99368e+07	3.69073e+07	2.78956e+07	2.9186e+07	3.85742e+07	3.3082e+07
Deoxyadenosine	0	0	0	0	0	0	0	0	0	0	0	0	0	0	0	0	0	0	0	0	0	0	0	0	0	0	0	0	0	0	0	0
Deoxyadenosine monophosphate	0	0	0	0	0	0	0	0	0	0	0	0	0	0	0	0	0	0	0	0	0	0	0	0	0	0	0	0	0	0	0	0
Deoxyadenosine triphosphate	0	0	0	0	0	0	0	0	0	0	0	0	0	0	0	0	0	0	0	0	0	0	0	0	0	0	0	0	0	0	0	0
Deoxycarnitine	1.37454e+07	1.18823e+07	1.32827e+07	1.29862e+07	1.36148e+07	1.32704e+07	1.28958e+07	7.38732e+06	5.42192e+06	5.01585e+06	4.89894e+06	5.364e+06	5.25729e+06	5.54798e+06	4.99722e+06	4.51376e+06	8.88561e+06	8.72386e+06	8.95322e+06	7.64874e+06	8.61783e+06	7.85676e+06	7.86575e+06	5.07906e+06	6.38376e+06	5.84464e+06	6.57369e+06	5.68029e+06	6.51234e+06	7.17691e+06	6.36037e+06	6.1271e+06
Deoxycholate	0	0	0	0	0	0	0	0	0	0	0	0	0	0	0	0	0	0	0	0	0	0	0	0	0	0	0	0	0	0	0	0
Deoxycytidine	0	0	0	0	0	0	0	0	0	0	0	0	0	0	0	0	0	0	0	0	0	0	0	0	0	0	0	0	0	0	0	0
Deoxycytidine diphosphate	0	0	0	0	0	0	0	0	0	0	0	0	0	0	0	0	0	0	0	0	0	0	0	0	0	0	0	0	0	0	0	0
Deoxycytidine monophosphate	0	0	0	0	0	0	0	0	0	0	0	0	0	0	0	0	0	0	0	0	0	0	0	0	0	0	0	0	0	0	0	0
Deoxyguanosine	0	0	0	0	0	0	0	0	0	0	0	0	0	0	0	0	0	0	0	0	0	0	0	0	0	0	0	0	0	0	0	0
Deoxyguanosine diphosphate	0	0	0	0	0	0	0	0	0	0	0	0	0	0	0	0	0	0	0	0	0	0	0	0	0	0	0	0	0	0	0	0
Deoxyguanosine monophosphate	0	0	0	0	0	0	0	0	0	0	0	0	0	0	0	0	0	0	0	0	0	0	0	0	0	0	0	0	0	0	0	0
Deoxyinosine	0	0	0	0	0	0	0	0	0	0	0	0	0	0	0	0	0	0	0	0	0	0	0	0	0	0	0	0	0	0	0	0
Deoxypentose monophosphates	0	0	0	0	0	0	0	0	0	0	0	0	0	0	0	0	0	0	0	0	0	0	0	0	0	0	0	0	0	0	0	0
Deoxyribose	200102	48241.4	243276	0	123130	89251.8	0	183013	191791	137807	0	112379	129217	0	0	97238.8	0	0	136053	177143	109336	103827	74619.1	0	168079	55812.6	171653	0	0	152870	176471	334471
Deoxyuridine	0	0	0	0	0	0	0	0	0	0	0	0	0	0	0	0	0	0	0	0	0	0	0	0	0	0	0	0	0	0	0	0
Deoxyuridine monophosphate	0	0	0	0	0	0	0	0	0	0	0	0	0	0	0	0	0	0	0	0	0	0	0	0	0	0	0	0	0	0	0	0
Deoxyuridine triphosphate	0	0	0	0	0	0	0	0	0	0	0	0	0	0	0	0	0	0	0	0	0	0	0	0	0	0	0	0	0	0	0	0
Dethiobiotin	422862	1.13467e+06	394629	772193	382695	420750	939109	140561	126018	690686	746478	299292	714297	638083	1.18255e+06	285385	1.18617e+06	1.33236e+06	313874	346303	732465	607888	872654	253114	291521	1.05303e+06	638634	839742	535146	279990	1.01471e+06	423242
Diaminopimelate	0	0	0	0	0	0	0	0	0	0	0	0	0	0	0	0	0	0	0	0	0	0	0	0	0	0	0	0	0	0	0	0
Diethanolamine	0	0	0	0	0	0	0	0	0	0	0	0	0	0	0	0	0	0	0	0	0	0	0	0	0	0	0	0	0	0	0	0
Dihydroorotate	0	0	0	0	0	0	0	0	0	0	0	0	0	0	0	0	0	0	0	0	0	0	0	0	0	0	0	0	0	0	0	0
Dihydrouracil	0	0	0	0	0	0	0	0	0	0	0	0	0	0	0	0	0	0	0	0	0	0	0	0	0	0	0	0	0	0	0	0
Dihydroxyacetone phosphate	0	0	0	0	0	0	0	0	0	0	0	0	0	0	0	0	0	0	0	0	0	0	0	0	0	0	0	0	0	0	0	0
Diphthamide	0	0	0	0	0	0	0	0	0	0	0	0	0	0	0	0	0	0	0	0	0	0	0	0	0	0	0	0	0	0	0	0
Dopamine	0	0	0	0	0	0	0	0	0	0	0	0	0	0	0	0	0	0	0	0	0	0	0	0	0	0	0	0	0	0	0	0
dTDP-glucose	0	0	0	0	0	0	0	0	0	0	0	0	0	0	0	0	0	0	0	0	0	0	0	0	0	0	0	0	0	0	0	0
Epinephrine	0	0	0	0	0	0	0	0	0	0	0	0	0	0	0	0	0	0	0	0	0	0	0	0	0	0	0	0	0	0	0	0
Erythritol	0	0	0	0	0	0	0	0	0	0	0	0	0	0	0	0	0	0	0	0	0	0	0	0	0	0	0	0	0	0	0	0
Erythrose 4-phosphate	0	0	0	0	0	0	0	0	0	0	0	0	0	0	0	0	0	0	0	0	0	0	0	0	0	0	0	0	0	0	0	0
Estradiol 17-alpha	0	0	0	0	0	0	176260	0	0	0	0	0	0	0	148824	0	0	0	0	0	0	0	0	0	0	92655.6	0	0	0	0	134800	0
Ethanolamine	0	0	0	0	0	0	0	0	0	0	0	0	0	0	0	0	0	0	0	0	0	0	0	0	0	0	0	0	0	0	0	0
Ethylmalonate	0	0	0	0	0	0	0	0	0	0	0	0	0	0	0	0	0	0	0	0	0	0	0	0	0	0	0	0	0	0	0	0
FA (12:0)	8.70506e+07	5.11697e+07	1.26952e+08	3.7102e+07	4.36208e+07	1.81584e+08	6.57241e+07	5.83481e+07	1.03556e+08	6.43871e+07	4.1037e+07	1.03012e+08	5.22919e+07	8.70698e+07	6.0245e+07	1.69773e+08	5.3611e+07	3.90142e+07	1.62872e+08	7.22793e+07	6.41961e+07	7.27923e+07	6.34986e+07	4.92361e+07	2.4566e+08	7.43257e+07	8.67759e+07	4.07268e+07	3.55525e+08	6.14489e+07	6.1334e+07	1.42498e+08
FA (14:0)	1.3179e+08	6.36276e+07	8.49228e+07	6.07461e+07	5.88791e+07	9.10275e+07	6.12671e+07	5.15572e+07	2.78975e+08	1.02291e+08	6.69767e+07	1.02949e+08	7.54823e+07	6.58785e+07	1.0581e+08	1.20246e+08	6.42019e+07	6.44017e+07	1.08543e+08	7.09829e+07	9.01879e+07	7.65404e+07	9.43538e+07	3.50404e+07	1.26656e+08	8.06313e+07	9.0101e+07	6.39905e+07	1.38447e+08	8.01218e+07	7.74681e+07	1.0402e+08
FA (16:0)	7.43918e+09	1.17948e+09	8.66807e+08	9.85472e+08	8.62536e+08	8.05259e+08	7.7661e+08	3.84462e+08	2.62964e+09	1.49861e+09	1.13456e+09	1.0934e+09	1.07631e+09	8.31608e+08	9.88778e+08	7.28069e+08	1.25867e+09	9.22712e+08	8.68925e+08	9.02474e+08	1.3465e+09	7.34709e+08	7.57282e+08	4.31381e+08	2.06287e+09	1.30223e+09	1.04885e+09	9.47313e+08	8.17333e+08	1.00145e+09	1.79941e+09	1.10191e+09
FA (16:1)	4.51936e+07	2.08918e+07	5.19213e+07	3.72864e+07	3.75215e+07	3.17933e+07	3.13554e+07	3.30934e+07	3.4239e+08	5.72637e+07	2.25057e+07	5.86405e+07	3.38449e+07	2.84608e+07	6.85329e+07	6.02535e+07	3.11632e+07	2.78312e+07	7.81237e+07	3.59347e+07	6.19882e+07	3.86099e+07	9.62694e+07	1.7128e+07	4.60977e+07	4.76453e+07	5.86094e+07	3.17272e+07	1.28944e+08	4.04928e+07	3.90738e+07	5.3977e+07
FA (18:0)	4.34549e+09	5.87209e+08	4.67933e+08	5.04491e+08	3.81081e+08	3.72327e+08	3.71715e+08	1.92948e+08	1.30668e+09	6.69111e+08	4.88992e+08	5.34717e+08	4.80843e+08	3.54868e+08	4.26857e+08	3.28104e+08	5.26111e+08	4.08285e+08	4.0044e+08	3.79666e+08	7.40372e+08	3.38821e+08	3.43723e+08	1.71233e+08	1.05876e+09	5.63604e+08	5.53927e+08	4.15256e+08	3.82464e+08	4.34603e+08	8.13027e+08	4.81152e+08
FA (18:1)	2.62048e+08	4.18124e+07	4.3294e+07	5.5694e+07	5.40609e+07	3.2598e+07	3.65781e+07	2.46626e+07	2.94746e+08	5.70737e+07	3.61184e+07	4.70796e+07	4.18873e+07	3.6645e+07	4.36235e+07	4.10193e+07	3.50964e+07	3.68539e+07	3.9689e+07	3.97187e+07	6.09451e+07	3.73901e+07	5.7895e+07	1.56042e+07	5.22597e+07	4.04609e+07	3.61617e+07	2.96319e+07	7.65565e+07	4.39361e+07	6.77639e+07	4.41031e+07
FA (20:0)	4.66858e+07	1.12854e+07	8.34189e+06	1.06548e+07	9.20764e+06	7.56939e+06	8.07651e+06	3.73685e+06	3.21579e+07	1.39117e+07	9.64731e+06	1.1963e+07	8.79644e+06	7.08033e+06	7.78979e+06	7.16296e+06	7.11103e+06	7.59256e+06	9.23974e+06	8.14721e+06	1.26921e+07	7.508e+06	7.94925e+06	3.98039e+06	1.26651e+07	8.22397e+06	7.05181e+06	7.9047e+06	7.78208e+06	7.36441e+06	1.16154e+07	8.81648e+06
FA (20:2)	0	611290	94503.4	275291	639502	98300	0	87084.4	3.69921e+06	0	118492	120802	244062	0	0	129939	157333	102404	448970	0	0	0	197458	0	0	0	111497	0	581730	0	0	0
FA (8:0)	6.68789e+07	4.69204e+07	8.5045e+07	4.93791e+07	7.22916e+07	6.36885e+07	4.03821e+07	3.53419e+07	1.2085e+08	9.13947e+07	6.37523e+07	6.18925e+07	7.74478e+07	5.59456e+07	6.39152e+07	6.99097e+07	5.64268e+07	4.75218e+07	5.04432e+07	7.99182e+07	6.28529e+07	5.42417e+07	5.26226e+07	2.72914e+07	1.08994e+08	5.54345e+07	7.95767e+07	5.63926e+07	5.56095e+07	7.18351e+07	8.1403e+07	7.84686e+07
Ferulate	0	0	0	0	0	0	0	0	0	0	0	0	0	0	0	0	0	0	0	0	0	0	0	0	0	0	0	0	0	0	0	0
Formylglycine	0	0	0	0	0	0	0	0	0	0	0	0	0	0	0	0	0	0	0	0	0	0	0	0	0	0	0	0	0	0	0	0
Fructose 1,6-bisphosphate	0	0	0	0	0	0	0	0	0	0	0	0	0	0	0	0	0	0	0	0	0	0	0	0	0	0	0	0	0	0	0	0
Fructose 6-phosphate	7.35524e+06	6.17803e+06	7.08515e+06	6.83211e+06	8.06352e+06	7.37452e+06	8.50536e+06	6.13294e+06	2.62873e+06	3.20194e+06	3.49966e+06	3.9314e+06	3.63807e+06	3.7517e+06	3.44825e+06	3.82965e+06	22354.8	33869	19985.5	50688.4	59603.7	25323.5	31499.1	14984.6	0	0	0	0	16667.1	0	0	29447.8
Fucose 1-phosphate	0	0	0	0	0	0	0	0	0	0	0	0	0	0	0	0	0	0	0	0	0	0	0	0	0	0	0	0	0	0	0	0
Fumarate	4.94888e+06	3.99182e+06	2.69918e+06	4.2332e+06	2.80167e+06	3.14134e+06	2.12744e+06	2.58588e+06	0	2.22018e+06	2.12334e+06	1.44684e+06	2.42815e+06	1.96436e+06	2.39429e+06	1.21776e+06	2.69782e+06	3.49519e+06	2.0348e+06	5.05484e+06	4.33305e+06	2.18226e+06	2.46364e+06	4.16475e+06	3.39895e+06	2.17542e+06	1.60442e+06	3.55442e+06	3.47809e+06	3.47902e+06	3.56783e+06	1.6921e+06
Galactose 1-phosphate	7.35524e+06	6.17803e+06	7.08515e+06	6.83211e+06	8.06352e+06	7.37452e+06	8.50536e+06	6.13294e+06	2.62873e+06	3.20194e+06	3.49966e+06	3.9314e+06	3.63807e+06	3.7517e+06	3.44825e+06	3.82965e+06	22354.8	33869	19985.5	50688.4	59603.7	25323.5	31499.1	14984.6	0	0	0	0	16667.1	0	0	29447.8
Galacturonate	0	0	0	0	0	0	0	0	0	0	0	0	0	0	0	0	0	0	0	0	0	0	0	0	0	0	0	0	0	0	0	0
Gamma-aminobutyrate	3.72092e+07	3.86345e+07	4.23597e+07	3.8447e+07	4.30227e+07	3.89885e+07	4.22084e+07	2.32839e+07	1.53678e+07	2.7799e+07	2.5384e+07	2.77538e+07	2.68513e+07	2.70385e+07	2.75688e+07	2.39049e+07	2.3511e+07	2.42066e+07	2.19359e+07	2.17701e+07	2.41275e+07	1.49193e+07	2.49477e+07	1.3917e+07	2.25875e+07	2.32696e+07	1.61161e+07	2.45163e+07	2.16948e+07	2.20485e+07	2.44745e+07	1.78123e+07
Gamma-linolenate	0	0	0	0	0	0	0	0	0	0	0	0	0	0	0	0	0	0	0	0	0	0	0	0	0	0	0	0	0	0	0	0
Glu-Asp	0	0	0	0	0	0	0	0	0	0	0	0	0	0	0	0	0	0	0	0	0	0	0	0	0	0	0	0	0	0	0	0
Glu-Gln	0	0	0	0	0	0	0	0	0	0	0	0	0	0	0	0	0	0	0	0	0	0	0	0	0	0	0	0	0	0	0	0
Glu-Glu	21698	0	84643.1	34958	25162.1	41788.3	19227	0	0	0	0	0	20862.3	0	0	0	0	0	0	0	0	0	0	0	0	0	0	0	0	0	0	0
Glu-Pro	1.10829e+06	844562	1.02944e+06	947606	924399	960814	835387	489748	180119	373349	300186	113833	158311	152995	201386	224041	284539	449017	297132	472055	213738	196167	359389	152496	192654	177969	0	105779	272483	0	224572	248088
Gluconate	0	0	0	0	0	0	0	0	0	0	0	0	0	0	0	0	0	0	0	0	0	0	0	0	0	0	0	0	0	0	0	0
Gluconolactone	0	0	0	0	0	0	0	0	0	0	0	0	0	0	0	0	0	0	0	0	0	0	0	0	0	0	0	0	0	0	0	0
Glucosaminate	0	0	0	0	0	0	0	0	0	0	0	0	0	0	0	0	0	0	0	0	0	0	0	0	0	0	0	0	0	0	0	0
Glucosamine 6-phosphate	0	0	0	0	0	0	0	0	0	0	0	0	0	0	0	0	0	0	0	18419.2	84914.1	18307.1	59038.9	0	0	0	0	0	33245.9	0	0	0
Glucosamine 6-sulfate	0	0	0	0	0	0	0	0	0	0	0	0	0	0	0	0	0	0	0	0	0	0	0	0	0	0	0	0	0	0	0	0
Glucose	0	0	0	0	0	0	0	0	0	0	0	0	0	0	0	0	0	0	0	0	0	0	0	0	0	0	0	0	0	0	0	0
Glucose 1-phosphate	0	0	0	0	0	0	0	0	0	0	0	0	0	0	0	0	0	0	0	0	0	0	0	0	0	0	0	0	0	0	0	0
Glucose 6-phosphate	550480	396061	624125	714206	554808	525768	743407	592415	249453	35783.1	171335	133224	118267	164424	130790	182629	220819	154669	137198	63775	134241	60987.5	160622	123876	45930.6	0	39839	88017.8	28634.4	0	75688.9	71763.2
Glucuronolactone	0	12653.7	0	10363.4	10124.9	0	24124	0	0	31828.2	0	0	0	0	0	0	16196	0	0	0	0	18921.3	0	0	0	0	0	0	11214.9	0	0	19981.9
Glutamate	3.99321e+08	3.44159e+08	4.22358e+08	4.00592e+08	4.20484e+08	3.92586e+08	4.08187e+08	2.7005e+08	1.33497e+08	1.56553e+08	1.66168e+08	1.89319e+08	1.67201e+08	1.83856e+08	1.7287e+08	1.80742e+08	2.87062e+08	3.04133e+08	3.32911e+08	2.79639e+08	3.1399e+08	2.74597e+08	2.95934e+08	2.11618e+08	1.92297e+08	1.84786e+08	2.06741e+08	2.06806e+08	2.23893e+08	2.25678e+08	1.94475e+08	2.26167e+08
Glutamine	6.57179e+08	5.86075e+08	6.46459e+08	6.37222e+08	6.42874e+08	6.13135e+08	6.27196e+08	3.31266e+08	2.18618e+08	2.66755e+08	2.38755e+08	2.48726e+08	2.3867e+08	2.45161e+08	2.30806e+08	2.42776e+08	4.0363e+08	3.95198e+08	4.44505e+08	4.07217e+08	4.31172e+08	3.74892e+08	4.21783e+08	2.38286e+08	2.68365e+08	2.64477e+08	2.91096e+08	2.7977e+08	2.82532e+08	3.1872e+08	2.54444e+08	2.73275e+08
Glutarate	0	0	0	0	0	0	0	0	0	0	0	0	0	0	0	0	0	0	0	0	0	0	0	0	0	0	0	0	0	0	0	0
Glutathione	2.40834e+07	2.05287e+07	2.3424e+07	2.2789e+07	2.41954e+07	2.16082e+07	2.20989e+07	1.4478e+07	1.25722e+07	1.43941e+07	1.43469e+07	1.49248e+07	1.30381e+07	1.44487e+07	1.24025e+07	1.3249e+07	3.8825e+07	3.82405e+07	4.38575e+07	3.40053e+07	4.06946e+07	3.43166e+07	3.93724e+07	2.5778e+07	2.63855e+07	2.68404e+07	2.61295e+07	2.72626e+07	2.99123e+07	3.00085e+07	2.66885e+07	2.80124e+07
Glutathione disulfide	3.52226e+06	3.50788e+06	3.59489e+06	3.5146e+06	3.30404e+06	2.92138e+06	3.45215e+06	2.45277e+06	2.02076e+06	1.99093e+06	1.73162e+06	1.87334e+06	1.66863e+06	1.67526e+06	1.47261e+06	1.42554e+06	6.34191e+06	7.53374e+06	7.36742e+06	5.82068e+06	6.78468e+06	6.50279e+06	7.22241e+06	6.46008e+06	5.08047e+06	4.37373e+06	4.90264e+06	4.6355e+06	4.66223e+06	5.76325e+06	4.17322e+06	4.96866e+06
Gly-Leu	0	0	0	0	0	0	0	0	0	0	0	0	0	0	0	0	0	0	0	0	0	0	0	0	0	0	0	0	0	0	0	0
Glyceraldehyde	0	0	0	0	0	0	0	0	0	0	0	0	0	0	0	0	0	0	0	0	0	0	0	0	0	0	0	0	0	0	0	0
Glyceraldehyde 3-phosphate	1.67497e+06	1.42653e+06	1.85307e+06	1.86139e+06	1.90281e+06	2.04244e+06	2.16777e+06	1.25196e+06	564446	527886	596166	738474	775842	771852	745616	764824	307188	332531	352327	159258	246783	208738	291101	227937	29102.2	142699	150218	223813	236523	131665	178695	268389
Glycerate	0	0	0	0	0	0	0	0	0	0	0	0	0	0	0	0	0	0	0	0	0	0	0	0	0	0	0	0	0	0	0	0
Glycerol 3-phosphate	93123.7	71998.4	77570.5	104604	83588.3	169234	163805	81196.3	23070.3	42200.4	15560.9	0	33890.7	18332.7	32063.8	22030.5	1.78592e+06	1.93724e+06	2.3818e+06	1.68336e+06	2.03494e+06	1.7197e+06	1.88414e+06	1.40286e+06	948243	1.0717e+06	1.06584e+06	1.10456e+06	1.15129e+06	1.37467e+06	1.05573e+06	1.23278e+06
Glycerol cyclic phosphate	194281	222287	78378	44751.3	84489.2	66865.6	57580.3	100681	147539	106873	35842.2	70632	89526.2	64193.5	106883	100568	139888	113594	108659	108593	99184.9	103879	100864	106246	91794.6	153735	107990	133449	148793	72176.1	37586.2	35764.7
Glycerophosphocholine	4.4644e+07	4.28138e+07	5.13895e+07	4.64672e+07	5.10321e+07	4.82573e+07	5.34248e+07	4.16437e+07	1.12108e+07	1.23931e+07	1.38044e+07	1.42455e+07	1.31837e+07	1.43828e+07	1.3624e+07	1.45764e+07	5.61659e+07	6.40876e+07	6.75747e+07	6.20385e+07	6.67447e+07	6.25201e+07	7.27893e+07	5.98716e+07	3.22943e+07	3.47388e+07	3.91497e+07	3.678e+07	3.90516e+07	4.28002e+07	4.0218e+07	4.15093e+07
Glycerophosphoethanolamine	6.63364e+06	5.51701e+06	6.328e+06	5.89331e+06	6.23061e+06	5.80867e+06	6.40593e+06	4.34588e+06	2.20202e+06	2.20074e+06	2.21056e+06	2.29017e+06	2.17458e+06	2.234e+06	2.22631e+06	2.1093e+06	1.2386e+07	1.24513e+07	1.36493e+07	1.21259e+07	1.3121e+07	1.18487e+07	1.31358e+07	9.26998e+06	8.98714e+06	8.24419e+06	9.00687e+06	8.77954e+06	9.29107e+06	9.89618e+06	8.38202e+06	9.10102e+06
Glycerophosphoinositol	2.90838e+06	2.29514e+06	2.68538e+06	2.79223e+06	2.64804e+06	2.60346e+06	3.00452e+06	2.08577e+06	865800	910559	1.03156e+06	946185	979024	1.04989e+06	908332	997633	894040	943322	919407	798800	1.06726e+06	1.01111e+06	994864	872480	550868	587054	506010	586520	698717	745610	600150	681144
Glycine	0	0	0	0	0	0	0	0	0	0	0	0	0	0	0	0	0	0	0	0	0	0	0	0	0	0	0	0	0	0	0	0
Glycochenodeoxycholate	0	0	0	0	0	0	0	0	0	0	0	0	0	0	0	0	0	0	0	0	0	0	0	0	0	0	0	0	0	0	0	0
Glycocholate	0	0	0	0	0	0	0	0	0	0	0	0	0	0	0	0	0	0	0	0	0	0	0	0	0	0	0	0	0	0	0	0
Glycolaldehyde	0	0	0	0	0	0	0	0	0	0	0	0	0	0	0	0	0	0	0	0	0	0	0	0	0	0	0	0	0	0	0	0
Guanidinoacetate	0	0	0	0	0	0	0	0	0	0	0	0	0	0	0	0	0	0	0	0	0	0	0	0	0	0	0	0	0	0	0	0
Guanidinosuccinate	0	0	0	0	0	0	0	0	0	0	0	0	0	0	0	0	0	0	0	0	0	0	0	0	0	0	0	0	0	0	0	0
Guanine	0	0	0	0	0	0	0	0	0	0	0	0	0	0	0	0	0	0	0	0	0	0	0	0	0	0	0	0	0	0	0	0
Guanosine	0	0	0	0	0	0	0	0	0	0	0	0	0	0	0	0	0	0	0	0	0	0	0	0	0	0	0	0	0	0	0	0
Guanosine diphosphate	0	0	0	0	0	0	0	0	0	0	0	0	0	0	0	0	0	0	0	0	0	0	0	0	0	0	0	0	0	0	0	0
Guanosine diphosphate mannose	152499	99431.9	183220	152200	150265	172268	171614	118912	0	0	21434.6	0	19504.8	34906.1	44789.1	14983.9	18773.2	92039.2	61248.3	15522	65883.2	69369.7	65660.5	90756.8	0	0	13230.8	0	53775.3	14002.6	13825.1	18976.3
Guanosine monophosphate	0	0	20486.7	65891.2	32807.1	55816.4	0	14699.4	0	38212	107655	92817.8	113857	146235	32003.6	53997.6	0	27568.8	0	0	0	0	0	0	0	0	0	33817.9	56752.2	35954.8	0	0
Gulonolactone	0	0	0	0	0	0	0	0	0	0	0	0	0	0	0	0	0	0	0	0	0	0	0	0	0	0	0	0	0	0	0	0
Hexarates	0	0	0	0	0	0	0	0	0	0	0	0	0	0	0	0	0	0	0	0	0	0	0	0	0	0	0	0	0	0	0	0
Hexitols	404111	424944	365941	335471	364721	339719	401647	308607	86992.1	567809	173358	381744	117347	106602	78011.1	86725	164915	284275	115806	106059	168435	134851	199188	126236	226094	57256.9	49264.7	93620.5	184967	63933.5	26651.6	115731
Hexosamines	47991.4	147965	78935.5	92704.5	200957	70346.3	0	65453	110388	64232	146825	129102	186538	0	237865	104999	139730	92144.5	160017	101652	72004.3	174422	43234.9	140744	96036.8	87980.3	150704	31023.4	161991	171813	155523	69647.2
Hippurate	0	0	0	0	0	0	0	0	0	0	0	0	0	0	0	0	0	0	0	0	0	0	0	0	0	0	0	0	0	0	0	0
Histamine	0	0	0	0	0	0	0	0	0	0	0	0	0	0	0	0	0	0	0	0	0	0	0	0	0	0	0	0	0	0	0	0
Histidine	2.42159e+07	2.1574e+07	2.77285e+07	2.25936e+07	2.43916e+07	2.39311e+07	2.47784e+07	1.64563e+07	7.73666e+06	1.2032e+07	1.02819e+07	1.11156e+07	1.02976e+07	1.08943e+07	1.18279e+07	1.09329e+07	1.00198e+07	1.17961e+07	1.07088e+07	1.1602e+07	1.13348e+07	1.10437e+07	1.17576e+07	7.99811e+06	7.96032e+06	8.66224e+06	9.75322e+06	9.46255e+06	9.65872e+06	1.0047e+07	8.60284e+06	1.14839e+07
Histidinol	0	0	0	0	0	0	0	0	0	0	0	0	0	0	0	0	0	0	0	0	0	0	0	0	0	0	0	0	0	0	0	0
Homoarginine	0	0	0	0	0	0	0	0	0	0	0	0	0	0	0	0	0	0	0	0	0	0	0	0	0	0	0	0	0	0	0	0
Homocysteine	0	0	0	0	0	0	0	0	0	0	0	0	0	0	0	0	0	0	0	0	0	0	0	0	0	0	0	0	0	0	0	0
Homocysteine thiolactone	0	126474	125058	0	0	0	117557	0	264064	0	0	0	0	0	0	0	0	146047	0	0	0	0	0	0	229521	0	0	0	0	0	113915	0
Homocystine	0	0	0	0	0	0	0	0	0	0	0	0	0	0	0	0	0	0	0	0	0	0	0	0	0	0	0	0	0	0	0	0
Homogentisate	0	0	0	0	0	0	0	0	0	0	0	0	0	0	0	0	0	0	0	0	0	0	0	0	0	0	0	0	0	0	0	0
Homoserine	0	0	0	0	0	0	0	0	0	0	0	0	0	0	0	0	0	0	0	0	0	0	0	0	0	0	0	0	0	0	0	0
Homovanillate	0	0	0	0	0	0	0	0	0	0	0	0	0	0	0	0	0	0	0	0	0	0	0	0	0	0	0	0	0	0	0	0
Hydroquinone	0	0	0	0	0	0	0	0	0	0	0	0	0	0	0	0	0	0	0	0	0	0	0	0	0	0	0	0	0	0	0	0
Hydroxy-FA (10:0)	3.13205e+06	2.91611e+06	3.68884e+06	2.65768e+06	2.87976e+06	3.17579e+06	3.89078e+06	1.32625e+06	4.36398e+06	3.42821e+06	2.63314e+06	3.41822e+06	2.37202e+06	2.64503e+06	2.4479e+06	3.13709e+06	2.66165e+06	2.17948e+06	3.21887e+06	3.49314e+06	2.75338e+06	2.63564e+06	2.68627e+06	1.29302e+06	4.88985e+06	2.71059e+06	3.51682e+06	2.49167e+06	3.71853e+06	3.43501e+06	3.21923e+06	4.42066e+06
Hydroxy-FA (12:0)	4.75331e+06	2.99566e+06	5.46765e+06	4.64008e+06	3.31659e+06	4.08798e+06	2.99441e+06	1.56274e+06	4.50348e+06	2.53677e+06	1.70501e+06	4.3657e+06	1.35128e+06	2.99297e+06	2.60496e+06	4.63799e+06	2.8081e+06	1.99998e+06	4.81704e+06	3.12298e+06	3.26965e+06	3.61019e+06	3.772e+06	1.37445e+06	5.05556e+06	2.52944e+06	2.82525e+06	4.5379e+06	4.78086e+06	3.58594e+06	1.73707e+06	3.89092e+06
Hydroxy-FA (18:1)	2.24577e+07	1.22705e+07	1.07288e+07	1.34239e+07	9.10294e+06	7.19495e+06	1.02491e+07	5.00813e+06	1.95134e+07	1.17773e+07	1.00219e+07	1.16592e+07	1.03902e+07	9.30799e+06	8.14362e+06	8.44286e+06	9.76693e+06	9.87926e+06	1.08993e+07	8.67993e+06	8.64697e+06	7.45846e+06	8.64962e+06	5.87802e+06	1.61396e+07	9.66009e+06	1.05728e+07	8.83179e+06	1.09006e+07	1.13093e+07	1.21931e+07	1.33921e+07
Hydroxy-FA (6:0)	0	0	0	0	0	0	0	0	0	0	0	0	0	0	0	0	0	0	0	0	0	0	0	0	0	0	0	0	0	0	0	0
Hydroxy-FA (7:0)	9.65237e+06	7.83833e+06	1.06277e+07	9.528e+06	9.07447e+06	7.32049e+06	1.04596e+07	4.68229e+06	1.30812e+07	9.15855e+06	6.74996e+06	8.04062e+06	7.90883e+06	6.65698e+06	7.29667e+06	1.00662e+07	9.02387e+06	7.70626e+06	9.66164e+06	1.01972e+07	9.23103e+06	1.03072e+07	8.65249e+06	4.15048e+06	9.69691e+06	8.67421e+06	1.01087e+07	7.44387e+06	9.07067e+06	1.21791e+07	9.92717e+06	1.33783e+07
Hydroxy-FA (8:0)	5.63801e+06	3.9756e+06	4.66577e+06	3.26024e+06	3.70913e+06	3.76768e+06	4.61295e+06	2.08695e+06	4.95715e+06	4.17603e+06	3.58112e+06	4.58437e+06	3.9737e+06	3.47464e+06	2.80511e+06	4.0844e+06	4.35155e+06	3.57195e+06	4.29148e+06	4.22335e+06	3.855e+06	3.53477e+06	3.38616e+06	2.25756e+06	5.3173e+06	3.93922e+06	4.60117e+06	3.80079e+06	4.09332e+06	4.68657e+06	3.91015e+06	5.07245e+06
Hydroxycitrate	0	0	0	0	0	0	0	0	0	0	0	0	0	0	0	0	0	0	0	0	0	0	0	0	0	0	0	0	0	0	0	0
Hydroxyphenyllactate	0	0	0	0	0	0	0	0	0	0	0	0	0	0	0	0	0	0	0	0	0	0	0	0	0	0	0	0	0	0	0	0
Hypotaurine	2.65422e+06	2.21334e+06	2.80601e+06	2.63235e+06	2.76636e+06	2.43841e+06	2.22672e+06	2.01273e+06	950877	1.00592e+06	1.0283e+06	1.16154e+06	967498	940535	1.06867e+06	974566	3.87193e+06	4.01095e+06	4.39952e+06	4.01964e+06	4.34275e+06	3.86174e+06	4.17588e+06	2.86778e+06	2.98352e+06	2.87438e+06	3.34245e+06	3.14802e+06	3.1171e+06	3.52748e+06	3.18896e+06	3.24262e+06
Hypoxanthine	2.80887e+06	3.2844e+06	3.7537e+06	3.8616e+06	3.27746e+06	3.00577e+06	3.7552e+06	1.6846e+06	430566	628911	1.06793e+06	1.20564e+06	1.43719e+06	1.018e+06	1.08005e+06	1.5887e+06	135834	99548.6	154716	0	72570.7	259251	317409	167134	144313	584900	993215	724521	827460	884343	262757	1.02156e+06
Indole	4.55472e+07	3.02777e+07	3.63593e+07	1.18431e+08	4.46576e+07	3.4049e+07	3.62727e+07	2.06804e+07	4.34841e+07	4.00056e+07	2.86438e+07	4.7865e+07	3.10501e+07	3.37351e+07	3.68909e+07	6.07623e+07	3.62109e+07	3.14866e+07	4.66358e+07	3.77002e+07	3.92475e+07	3.59974e+07	4.83399e+07	1.54174e+07	8.55675e+07	3.35138e+07	3.08011e+07	8.99309e+07	5.54531e+07	7.10877e+07	4.00677e+07	4.7836e+07
Indole-3-acetamide	0	0	0	0	0	0	0	0	0	0	0	0	0	0	0	0	0	0	0	0	0	0	0	0	0	0	0	0	0	0	0	0
Indole-3-acetate	0	0	0	0	0	0	0	0	0	0	0	0	0	0	0	0	0	0	0	0	0	0	0	0	0	0	0	0	0	0	0	0
Indole-3-acrylate	886210	911657	960350	750589	1.01754e+06	692099	901483	395986	237650	386567	275197	296264	307483	280959	366540	321112	0	35816	0	40611.3	36707	0	101110	0	0	0	0	0	0	0	0	0
Indole-3-ethanol	0	0	0	0	0	0	0	0	0	0	0	0	0	0	0	0	0	0	0	0	0	0	0	0	0	0	0	0	0	0	0	0
Indole-3-methyl acetate	0	0	0	0	0	0	0	0	0	0	0	0	0	0	0	0	0	0	0	0	0	0	0	0	0	0	0	0	0	0	0	0
Indole-3-pyruvate	0	0	0	0	0	0	0	0	0	0	0	0	0	0	0	0	0	0	0	0	0	0	0	0	0	0	0	0	0	0	0	0
Indoleacetaldehyde	0	0	0	0	0	0	0	0	0	0	0	0	0	0	0	0	0	0	0	0	0	0	0	0	0	0	0	0	0	0	0	0
Indoxyl sulfate	0	0	0	0	0	0	0	0	0	0	0	0	0	0	0	0	0	0	0	0	0	0	0	0	0	0	0	0	0	0	0	0
Inosine	0	0	0	0	0	0	0	0	0	0	0	0	0	0	0	0	0	0	0	0	0	0	0	0	0	0	0	0	0	0	0	0
Inosine diphosphate	0	0	0	0	0	0	0	0	0	0	0	0	0	0	0	0	0	0	0	0	0	0	0	0	0	0	0	0	0	0	0	0
Inosine monophosphate	418890	465879	472493	201530	228417	413801	249375	552694	170835	317157	692387	661746	624881	920879	743913	409593	0	0	0	0	31229.2	0	0	25534.3	304420	446543	154135	226847	73760.2	116182	156983	94906.5
Isoleucine	1.44897e+07	1.30922e+07	1.43722e+07	1.28678e+07	1.34637e+07	1.2168e+07	1.25011e+07	6.53214e+06	3.94731e+06	3.6186e+06	3.14244e+06	3.36905e+06	4.65958e+06	2.82636e+06	2.97035e+06	2.97844e+06	5.3329e+06	5.34254e+06	5.27752e+06	4.65577e+06	5.42272e+06	4.97288e+06	5.154e+06	2.44026e+06	3.71376e+06	2.76724e+06	2.90266e+06	3.09509e+06	3.37185e+06	3.31306e+06	3.33419e+06	3.2205e+06
Isopentenyl pyrophosphate	0	0	0	0	0	0	0	0	0	0	0	0	0	0	0	0	0	0	0	0	0	0	0	0	0	0	0	0	0	0	0	0
Itaconate	7.35683e+06	5.1511e+06	4.69092e+06	4.2148e+06	4.96414e+06	3.759e+06	5.55739e+06	0	5.83137e+06	3.98357e+06	3.13625e+06	3.21004e+06	2.87633e+06	3.29106e+06	2.84338e+06	5.02789e+06	1.75361e+06	1.55533e+06	4.11538e+06	5.51348e+06	6.07356e+06	6.80793e+06	3.63506e+06	0	2.69202e+06	1.31106e+06	5.40604e+06	2.15391e+06	4.24183e+06	1.04515e+07	3.3026e+06	5.36816e+06
Ketoleucine	0	0	0	0	0	0	0	0	0	0	0	0	0	0	0	0	0	0	0	0	0	0	0	0	0	0	0	0	0	0	0	0
Kynurenate	0	0	0	0	0	0	0	0	0	0	0	0	0	0	0	0	0	0	0	0	0	0	0	0	0	0	0	0	0	0	0	0
Kynurenine	0	0	0	0	0	0	0	0	0	0	0	0	0	0	0	0	0	0	0	0	0	0	0	0	0	0	0	0	0	0	0	0
L-DOPA	0	0	0	0	0	0	0	0	0	0	0	0	0	0	0	0	0	0	0	0	0	0	0	0	0	0	0	0	0	0	0	0
Lactate	8.05033e+08	3.43344e+08	9.20903e+08	3.29241e+08	6.36465e+08	5.90899e+08	3.62886e+08	5.31926e+08	5.9878e+08	7.1914e+08	4.42417e+08	7.13813e+08	6.42592e+08	4.89971e+08	3.13834e+08	8.28256e+08	4.11583e+08	2.4561e+08	5.40381e+08	7.95092e+08	7.95323e+08	7.32628e+08	4.51889e+08	3.9005e+08	8.99721e+08	6.46387e+08	7.48058e+08	3.45734e+08	5.52386e+08	7.81301e+08	6.06827e+08	9.89698e+08
Lactose	0	0	0	0	0	0	0	0	0	0	0	0	0	0	0	0	0	0	0	0	0	0	0	0	0	0	0	0	0	0	0	0
Leu-Leu	2.15777e+06	7.17918e+06	1.9744e+06	3.39569e+06	2.97005e+06	2.23596e+06	4.87578e+06	0	2.06344e+06	2.45764e+06	4.49054e+06	2.7484e+06	4.38381e+06	2.68014e+06	3.47198e+06	1.83035e+06	5.02524e+06	5.39521e+06	1.88542e+06	3.79722e+06	2.55134e+06	2.89082e+06	3.04538e+06	0	2.28023e+06	4.5003e+06	2.72859e+06	2.91836e+06	2.38569e+06	2.29615e+06	3.69223e+06	3.02361e+06
Leu-Pro	757637	694529	535128	589762	747614	728920	713240	344080	279217	203994	342661	281927	268384	320924	206487	115859	484044	266224	255442	154300	260229	235998	299598	0	199201	190466	152968	239614	268846	149633	148481	117884
Leu-Val	0	0	0	0	0	0	0	0	0	0	0	0	0	0	0	0	0	0	0	0	0	0	0	0	0	0	0	0	0	0	0	0
Leucine	1.51916e+07	1.32701e+07	1.35226e+07	1.29211e+07	1.45376e+07	1.3609e+07	1.33662e+07	6.49912e+06	4.40579e+06	4.46756e+06	3.49232e+06	4.13237e+06	4.40701e+06	3.21419e+06	6.89667e+06	3.5646e+06	5.75554e+06	5.38713e+06	5.74284e+06	4.54679e+06	5.81234e+06	5.29565e+06	5.09498e+06	2.85332e+06	3.64213e+06	3.58728e+06	6.48788e+06	3.20031e+06	3.3413e+06	4.28582e+06	3.46394e+06	3.60336e+06
Liothyronine	0	0	0	0	0	0	0	0	0	0	0	0	0	0	0	0	0	0	0	0	0	0	0	0	0	0	0	0	0	0	0	0
Lipoamide	0	0	0	0	0	0	0	0	0	0	0	0	0	0	0	0	0	0	0	0	0	0	0	0	0	0	0	0	0	0	0	0
Lithocholate	0	0	0	0	0	0	0	0	0	0	0	0	0	0	0	0	0	0	0	0	0	0	0	0	0	0	0	0	0	0	0	0
Lithocholyltaurine	0	0	0	0	0	0	0	0	0	0	0	0	0	0	0	0	0	0	0	0	0	0	0	0	0	0	0	0	0	0	0	0
Lumichrome	2.06092e+07	2.75194e+06	3.80594e+06	3.98217e+06	2.01359e+06	3.63849e+06	3.21864e+06	1.53471e+06	2.51978e+06	1.02827e+07	1.69541e+06	4.70146e+06	1.54501e+06	1.57125e+06	1.83816e+06	958456	1.88699e+06	2.47875e+06	1.73872e+06	1.94443e+06	4.84685e+06	3.27891e+06	2.08615e+06	1.36715e+06	5.10848e+06	4.42879e+06	4.41512e+06	2.53818e+06	1.49407e+06	4.51163e+06	7.97864e+06	4.04404e+06
Lysine	946189	999742	837717	793726	959006	790434	664010	231523	408120	379424	0	0	0	0	0	271708	331191	593511	399941	498954	369665	228925	306818	0	0	0	238670	244497	0	209133	0	382132
Lyso-PC (16:0)	3.2553e+07	2.63278e+07	2.587e+07	2.05475e+07	2.24873e+07	2.39212e+07	2.24635e+07	1.12295e+07	1.36888e+07	1.20758e+07	8.6632e+06	8.7276e+06	9.84431e+06	7.92642e+06	8.81961e+06	8.85439e+06	1.20563e+07	1.1602e+07	9.85142e+06	8.47365e+06	7.79411e+06	8.44905e+06	8.72387e+06	4.29086e+06	7.44737e+06	6.7972e+06	5.36679e+06	4.23014e+06	5.16734e+06	4.80892e+06	3.84654e+06	4.37525e+06
Lyso-PC (17:0)	2.7313e+06	2.31928e+06	1.9133e+06	1.79367e+06	1.96131e+06	2.12719e+06	1.69274e+06	853951	993429	772784	750142	803388	627408	660260	372839	850842	500497	440796	430690	431550	354902	185142	238720	79575.1	170554	110476	114441	192512	58451.6	0	45701.1	91557.3
Lyso-PC (18:0)	5.76228e+07	5.31648e+07	4.97478e+07	4.44064e+07	4.64948e+07	4.61436e+07	4.38997e+07	2.14327e+07	2.71627e+07	2.33806e+07	2.09059e+07	2.05629e+07	2.13432e+07	2.05905e+07	1.99871e+07	2.09244e+07	1.87422e+07	1.5045e+07	1.65013e+07	1.45187e+07	1.31201e+07	1.40712e+07	1.35101e+07	6.95268e+06	1.00508e+07	8.1868e+06	7.48858e+06	6.6579e+06	7.73077e+06	7.07944e+06	6.84774e+06	7.0183e+06
Lyso-PC (18:1)	1.33021e+07	9.65099e+06	9.43068e+06	7.88567e+06	8.24996e+06	8.83429e+06	8.36923e+06	3.91344e+06	5.09461e+06	4.32432e+06	3.24659e+06	3.3808e+06	3.48765e+06	3.10104e+06	3.22341e+06	3.27977e+06	6.63838e+06	4.66803e+06	5.63511e+06	5.0876e+06	4.16822e+06	4.1367e+06	4.3361e+06	1.9604e+06	2.97619e+06	2.21272e+06	2.07143e+06	1.64387e+06	2.03583e+06	1.79779e+06	1.79643e+06	1.64465e+06
Lyso-PC (18:2)	217240	351552	177190	67210	66483.5	119954	277775	0	57323.8	47217.9	0	0	0	0	100327	0	0	0	71331.5	0	0	0	0	0	0	0	0	42096.8	0	0	0	0
Lyso-PC (22:4)	0	0	0	0	0	0	0	0	0	0	0	0	0	0	0	0	0	0	0	0	0	0	0	0	0	0	0	0	0	0	0	0
Lyso-PE (16:0)	243364	183912	214086	92701	0	154122	222381	0	168833	96687.7	0	0	0	0	127309	0	326132	127398	176301	100212	191440	0	0	68745.8	41368	151844	63620.5	142798	122563	143585	0	52005.7
Lyso-PE (18:0)	3.47082e+06	3.02486e+06	2.9941e+06	2.55971e+06	2.60989e+06	2.82308e+06	2.66074e+06	1.52947e+06	1.98074e+06	1.61383e+06	1.74414e+06	1.9277e+06	1.54112e+06	1.56269e+06	1.55344e+06	1.58472e+06	1.71121e+06	1.70666e+06	1.73456e+06	1.54905e+06	1.61389e+06	1.73287e+06	1.54008e+06	769567	1.41038e+06	1.0335e+06	1.2246e+06	902281	1.16005e+06	1.10667e+06	991481	1.15249e+06
Lyso-PE (18:1)	701036	718439	710953	634709	725957	780887	906537	266583	460205	656905	418263	437692	404227	352643	384556	330243	573948	527521	736387	718325	324989	475884	385924	80678.5	385128	373076	312624	207604	373614	199951	157695	239746
Lyso-PE (20:4)	693697	481191	510869	441561	457587	526958	307175	216461	529432	320539	127644	340259	258265	252331	345766	333913	52495.8	122297	197902	252779	94364.9	49866.9	0	84454.3	186541	104830	53294.6	183840	201262	90353.5	287884	55005.6
Lyso-PG (18:1)	0	0	0	0	0	0	0	0	0	0	0	0	0	0	0	0	0	0	0	0	0	0	0	0	0	0	0	0	0	0	0	0
Malate	3.23538e+07	2.77647e+07	2.90135e+07	3.11715e+07	2.87464e+07	2.84909e+07	3.04541e+07	2.31456e+07	1.11263e+07	1.33989e+07	1.49692e+07	1.48046e+07	1.45654e+07	1.26954e+07	1.28167e+07	1.24642e+07	4.24312e+07	4.36066e+07	4.49046e+07	3.96903e+07	4.50283e+07	4.00143e+07	4.37893e+07	3.9998e+07	3.4929e+07	2.19627e+07	2.0746e+07	2.44518e+07	2.44523e+07	2.04101e+07	2.19419e+07	2.04075e+07
Maleate	0	0	0	0	0	0	0	0	0	0	0	0	0	0	0	0	0	0	0	0	0	0	0	0	0	0	0	0	0	0	0	0
Malonate	4.15027e+06	3.22061e+06	3.11596e+06	2.23102e+06	3.21381e+06	3.45898e+06	4.93844e+06	2.5107e+06	2.63222e+06	4.52709e+06	3.08298e+06	2.17818e+06	2.57814e+06	2.35456e+06	1.76783e+06	2.58023e+06	3.25398e+06	2.89184e+06	2.189e+06	3.05128e+06	3.26569e+06	2.92276e+06	3.12238e+06	2.51823e+06	4.98419e+06	1.97601e+06	1.93026e+06	1.84774e+06	2.57147e+06	2.79036e+06	2.82334e+06	3.03932e+06
Maltose	0	0	62657.2	0	0	20023.8	299443	22805.5	0	282634	0	195414	49482.1	0	0	0	0	18378.6	0	86271	66841.6	0	532012	0	150061	0	306688	26840.9	67533.4	221991	0	51916.8
Mandelate	0	0	0	0	0	0	0	0	0	0	0	0	0	0	0	0	0	0	0	0	0	0	0	0	0	0	0	0	0	0	0	0
Mannose 6-phosphate	0	0	0	0	0	0	0	0	0	0	0	0	0	0	0	0	0	0	0	0	0	0	0	0	0	0	0	0	0	0	0	0
Melatonin	0	0	0	0	0	0	0	0	0	0	0	0	0	0	0	0	0	0	0	0	0	0	0	0	0	0	0	0	0	0	0	0
Melibiose	0	0	0	0	0	0	0	0	0	0	0	0	0	0	0	0	0	0	0	0	0	0	0	0	0	0	0	0	0	0	0	0
Mesoxalate	0	0	0	0	0	0	0	0	0	0	0	0	0	0	0	0	0	0	0	0	0	0	0	0	0	0	0	0	0	0	0	0
Met-Leu	0	0	0	0	0	0	0	0	0	0	0	0	0	0	0	0	0	0	0	0	0	0	0	0	0	0	0	0	0	0	0	0
Methacholine	1.78262e+06	1.60085e+06	1.68312e+06	1.42041e+06	1.68309e+06	1.39123e+06	1.3765e+06	931859	661672	679323	694651	729022	631132	654005	656734	555722	0	41411.5	0	0	0	0	0	0	0	0	0	0	0	0	0	0
Methionine	2.50725e+06	2.35239e+06	2.32526e+06	2.13755e+06	2.54693e+06	2.40447e+06	2.32287e+06	1.24584e+06	923801	957457	869804	753647	638852	797009	567200	845321	1.05679e+06	1.00678e+06	1.07509e+06	902635	932798	832827	874598	506330	391960	524795	457433	526467	475144	764806	505178	510897
Methionine sulfoximine	0	0	0	0	0	0	0	0	0	0	0	0	0	0	0	0	0	0	0	0	0	0	0	0	0	0	0	0	0	0	0	0
Methyglutarate	0	0	0	0	0	0	0	0	0	0	0	0	0	0	0	0	0	0	0	0	0	0	0	0	0	0	0	0	0	0	0	0
Methyl 4-aminobutyrate	0	0	0	0	0	0	0	0	0	0	0	0	0	0	0	0	0	0	0	0	0	0	0	0	0	0	0	0	0	0	0	0
Methyl vanillate	726786	1.54468e+06	595471	66918.5	347309	562974	1.39526e+06	371600	836112	631763	1.16222e+06	452020	1.18921e+06	857650	822830	165604	1.42694e+06	1.68909e+06	319182	496596	354157	723814	245324	322924	738548	1.18182e+06	839169	62935.2	306234	373261	1.35275e+06	480403
Methylguanine	0	0	0	0	0	0	0	0	0	0	0	0	0	0	0	0	0	0	0	0	0	0	0	0	0	0	0	0	0	0	0	0
Methylmalonate	0	0	0	0	0	0	0	0	0	0	0	0	0	0	0	0	0	0	0	0	0	0	0	0	0	0	0	0	0	0	0	0
Mevalolactone	3.91631e+07	3.2435e+07	4.17828e+07	3.54182e+07	4.08105e+07	3.83142e+07	3.08122e+07	1.98932e+07	2.69825e+07	1.82043e+07	1.58294e+07	1.82324e+07	1.94261e+07	1.43719e+07	1.37151e+07	1.67009e+07	1.33596e+07	1.10869e+07	1.62048e+07	2.06681e+07	1.6196e+07	1.68579e+07	1.3975e+07	8.96562e+06	2.29215e+07	1.42951e+07	1.9134e+07	1.38684e+07	1.65608e+07	1.53353e+07	1.47903e+07	1.79082e+07
Mevalonate	0	0	0	0	0	0	0	0	0	0	0	0	0	0	0	0	0	0	0	0	0	0	0	0	0	0	0	0	0	0	0	0
Monoethylmalonate	0	0	0	0	0	0	0	0	0	0	0	0	0	0	0	0	0	0	0	0	0	0	0	0	0	0	0	0	0	0	0	0
Monomethylglutarate	0	0	0	0	0	0	0	0	0	0	0	0	0	0	0	0	0	0	0	0	0	0	0	0	0	0	0	0	0	0	0	0
Myoinositol	1.23306e+08	1.06823e+08	1.17962e+08	1.15193e+08	1.05633e+08	1.17029e+08	1.17396e+08	8.27272e+07	6.58683e+07	5.93564e+07	5.79054e+07	5.89007e+07	5.8122e+07	6.23288e+07	5.3902e+07	4.99564e+07	1.92923e+07	1.80797e+07	1.90396e+07	1.84258e+07	1.95876e+07	1.69932e+07	1.64226e+07	1.5176e+07	1.6343e+07	1.58768e+07	1.40478e+07	1.5812e+07	1.55953e+07	1.51622e+07	1.27616e+07	1.38026e+07
N-Acetylalanine	0	0	0	0	0	0	0	0	0	0	0	0	0	0	0	0	0	0	0	0	0	0	0	0	0	0	0	0	0	0	0	0
N-Acetylasparagine	0	0	0	0	0	0	0	0	0	0	0	0	0	0	0	0	0	0	0	0	0	0	0	0	0	0	0	0	0	0	0	0
N-Acetylaspartate	1.05724e+08	8.44285e+07	1.0246e+08	9.81286e+07	1.06183e+08	9.84186e+07	1.01224e+08	7.09792e+07	3.27079e+07	3.3247e+07	3.40242e+07	3.84263e+07	3.57952e+07	3.74827e+07	3.32951e+07	3.64576e+07	2.51135e+06	2.87512e+06	3.72054e+06	2.76324e+06	2.43343e+06	2.25783e+06	2.64812e+06	2.19285e+06	2.65553e+06	2.47365e+06	2.62787e+06	2.40999e+06	2.18635e+06	2.26955e+06	2.36431e+06	2.46596e+06
N-Acetylcysteine	0	0	0	0	0	0	0	0	0	0	0	0	0	0	0	0	0	0	0	0	0	0	0	0	0	0	0	0	0	0	0	0
N-Acetylglutamate	0	0	0	0	0	0	0	0	0	0	0	0	0	0	0	0	0	0	0	0	0	0	0	0	0	0	0	0	0	0	0	0
N-Acetylglycine	0	0	0	0	0	0	0	0	0	0	0	0	0	0	0	0	0	0	0	0	0	0	0	0	0	0	0	0	0	0	0	0
N-Acetylhexosamine	0	0	0	0	0	0	0	0	0	0	0	0	0	0	0	0	0	0	0	0	0	0	0	0	0	0	0	0	0	0	0	0
N-Acetylhexosamine phosphate	1.03301e+06	651838	987901	931189	1.01074e+06	938999	1.03439e+06	715662	336038	300006	344293	293128	369410	406830	396771	322904	274893	313214	317657	239008	414138	350276	460913	370181	100591	206332	222718	113807	250338	310920	213380	218011
N-Acetylhexosamine sulfate	0	0	0	0	0	0	0	0	0	0	0	0	0	0	0	0	0	0	0	0	0	0	0	0	0	0	0	0	0	0	0	0
N-Acetylleucine	0	0	0	0	0	0	0	0	0	0	0	0	0	0	0	0	0	0	0	0	0	0	0	0	0	0	0	0	0	0	0	0
N-Acetylmethionine	0	0	0	0	0	0	0	0	0	0	0	0	0	0	0	0	167042	259016	281381	259671	255975	233693	287279	173116	71967	78135.7	221002	96730.4	199609	218861	120540	174840
N-Acetylneuraminate	0	0	0	0	0	0	0	0	0	0	0	0	0	0	0	0	0	0	0	0	0	0	0	0	0	0	0	0	0	0	0	0
N-Acetylornithine	0	0	0	0	0	0	0	0	0	0	0	0	0	0	0	0	0	0	0	0	0	0	0	0	0	0	0	0	0	0	0	0
N-Acetylphenylalanine	0	0	0	0	0	0	0	0	0	0	0	0	0	0	0	0	0	0	0	0	0	0	0	0	0	0	0	0	0	0	0	0
N-Acetylproline	0	0	0	0	0	0	0	0	0	0	0	0	0	0	0	0	0	0	0	0	0	0	0	0	0	0	0	0	0	0	0	0
N-Acetylputrescine	0	0	0	0	0	0	0	0	0	0	0	0	0	0	0	0	0	0	0	0	0	0	0	0	0	0	0	0	0	0	0	0
N-Acetylserine	0	0	0	0	0	0	0	0	0	0	0	0	0	0	0	0	0	0	0	0	0	0	0	0	0	0	0	0	0	0	0	0
N-Acetylserotonin	0	0	0	0	0	0	0	0	0	0	0	0	0	0	0	0	0	0	0	0	0	0	0	0	0	0	0	0	0	0	0	0
N-Acetyltryptophan	0	0	0	0	0	0	0	0	0	0	0	0	0	0	0	0	0	0	0	0	0	0	0	0	0	0	0	0	0	0	0	0
N-alpha-Acetyllysine	0	0	0	0	0	0	0	0	0	0	0	0	0	0	0	0	0	0	0	0	0	0	0	0	0	0	0	0	0	0	0	0
N-Formylmethionine	0	0	0	17398.7	44937.4	11050.3	9854.74	0	0	0	0	0	0	0	0	0	12799.2	16732.1	16257.7	0	27432.2	0	13892.2	18061.2	18538.4	0	0	11701.7	19657.1	0	10958.8	18906.7
N-Methylaspartate	0	0	0	0	0	0	0	0	0	0	0	0	0	0	0	0	0	0	0	0	0	0	0	0	0	0	0	0	0	0	0	0
N-Methylglutamate	0	0	0	0	0	0	0	0	0	0	0	0	0	0	0	0	0	0	0	0	0	0	0	0	0	0	0	0	0	0	0	0
N-Methyltryptamine	0	0	0	0	0	0	0	0	0	0	0	0	0	0	0	0	0	0	0	0	0	0	0	0	0	0	0	0	0	0	0	0
N-Ribosylnicotinamide	0	0	0	0	0	0	0	0	0	0	0	0	0	0	0	0	0	0	0	0	0	0	0	0	0	0	0	0	0	0	0	0
N-Undecanoylglycine	6.45707e+07	6.07945e+06	6.46844e+06	5.68931e+06	3.05431e+06	1.23299e+07	2.04625e+07	3.62051e+06	6.58072e+06	5.12772e+07	3.6945e+06	8.6918e+06	6.69567e+06	6.16917e+06	8.73129e+06	5.47664e+06	6.34068e+06	8.05147e+06	1.04549e+07	2.68714e+06	8.98962e+06	5.71457e+06	5.68518e+06	8.42343e+06	2.19608e+08	7.12581e+06	4.93156e+06	9.07837e+06	1.58314e+07	4.15075e+06	2.65273e+07	1.41707e+07
N,N-Dimethylarginine	1.83111e+06	1.88945e+06	2.12813e+06	2.02068e+06	1.77834e+06	1.82168e+06	1.93021e+06	1.02916e+06	382766	594677	407774	290937	515059	307605	455968	268206	1.14153e+06	1.0254e+06	1.22847e+06	917484	982629	900627	1.16036e+06	494916	607862	559702	413667	608073	407044	691643	506958	496694
N,N-Dimethyllysine	0	0	0	0	0	0	0	0	0	0	0	0	0	0	0	0	0	0	0	0	0	0	0	0	0	0	0	0	0	0	0	0
N,N,N-Trimethyllysine	787188	656595	763986	744883	766580	687854	721769	652918	179518	174335	0	212545	141726	173025	112267	0	246728	145981	348977	331424	441090	125568	213820	76720.5	27490.3	57067.3	107892	72151.6	104122	152714	87549.3	221488
N6-(delta2-Isopentenyl)-adenine	0	0	0	0	0	0	0	0	0	0	0	0	0	0	0	0	0	0	0	0	0	0	0	0	0	0	0	0	0	0	0	0
NAD+	1.18055e+07	1.0055e+07	1.09141e+07	1.06295e+07	1.17418e+07	1.16105e+07	1.14274e+07	7.79085e+06	3.76764e+06	4.17274e+06	4.16773e+06	4.94596e+06	4.55724e+06	5.21684e+06	4.56583e+06	4.89477e+06	3.51405e+06	3.7049e+06	3.8573e+06	3.1016e+06	3.61021e+06	3.3435e+06	3.7281e+06	2.72856e+06	2.71596e+06	2.28715e+06	2.49997e+06	2.77289e+06	3.08863e+06	3.18439e+06	2.67965e+06	3.11197e+06
NADH	532333	323740	432447	346788	429807	424672	431703	348524	55033.6	69577.9	62824.5	55202.8	40646.7	70603.8	104314	99982.2	94052.5	58133	70485.9	92957.6	85326.9	18787.8	60869.8	63993.7	36686	25754.3	20248.7	16829.7	25432.2	58182.3	36187.1	34518.1
NADP+	977053	706493	606928	673434	983876	590583	733672	539493	87651.1	132018	185839	130499	36593.1	55220.9	88830.5	99259	164212	137237	345777	153079	394517	191398	280880	107652	190898	288292	0	97170.5	361662	329471	258538	280864
NADPH	238634	60132.6	228191	261039	279723	384862	323389	255999	23968.8	44597.5	62052.4	114677	97448.7	176624	95086	84077.6	0	0	0	0	0	0	0	0	0	0	0	0	0	0	0	0
Nicotinamide	1.19145e+07	1.2459e+07	1.53905e+07	9.24849e+06	1.07524e+07	1.29508e+07	1.19433e+07	0	0	0	0	0	0	0	0	0	3.434e+07	4.85774e+07	4.46713e+07	4.19943e+07	3.89604e+07	4.53354e+07	4.53741e+07	3.19897e+07	2.21926e+07	1.75803e+07	2.28486e+07	1.75078e+07	2.93716e+07	2.30327e+07	1.75351e+07	2.74001e+07
Nicotinamide hypoxanthine dinucleotide	0	0	0	0	0	0	0	0	0	0	0	0	0	0	0	0	0	0	0	0	0	0	0	0	0	0	0	0	0	0	0	0
Nicotinamide mononucleotide	0	0	0	0	0	0	0	0	0	0	0	0	0	0	0	0	0	0	0	0	0	0	0	0	0	0	0	0	0	0	0	0
Nicotinate	0	0	0	0	0	0	0	0	0	0	0	0	0	0	0	0	0	0	0	0	0	0	0	0	0	0	0	0	0	0	0	0
Norleucine	0	0	0	0	0	0	0	0	0	0	0	0	0	0	0	0	0	0	0	0	0	0	0	0	0	0	0	0	0	0	0	0
Normetanephrine	0	0	0	0	0	0	0	0	0	0	0	0	0	0	0	0	0	0	0	0	0	0	0	0	0	0	0	0	0	0	0	0
Norvaline	0	0	0	0	0	0	0	0	0	0	0	0	0	0	0	0	0	0	0	0	0	0	0	0	0	0	0	0	0	0	0	0
O-Acetylserine	0	0	0	0	0	0	0	0	0	0	0	0	0	0	0	0	0	0	0	0	0	0	0	0	0	0	0	0	0	0	0	0
O-Succinyl homoserine	0	0	0	0	0	0	0	0	0	0	0	0	0	0	0	0	0	0	0	0	0	0	0	0	0	0	0	0	0	0	0	0
Octenoylglycine	0	0	0	0	0	0	0	0	0	0	0	0	0	0	0	0	0	0	0	0	0	0	0	0	0	0	0	0	0	0	0	0
Octopamine	0	0	0	0	0	0	0	0	0	0	0	0	0	0	0	0	0	0	0	0	0	0	0	0	0	0	0	0	0	0	0	0
Oleamide	2.62271e+06	2.64397e+06	2.35026e+06	2.38341e+06	2.17861e+06	2.29882e+06	1.91402e+06	787575	1.75023e+06	1.46379e+06	740248	1.24142e+06	787791	1.27783e+06	1.60425e+06	1.22769e+06	418232	434108	280777	296254	416828	119809	343696	0	556448	630137	519877	359489	995261	642240	311347	633494
Ophthalmate	1.77204e+06	1.47209e+06	1.80207e+06	1.67233e+06	1.87066e+06	2.08145e+06	1.91572e+06	1.01744e+06	510220	555882	526509	696780	646322	716832	579192	750041	352634	375653	507136	578573	453508	429765	573994	246810	233998	124776	63143.1	399217	416944	477664	319539	389621
Ornithine	675385	1.12381e+06	3.67026e+06	1.15615e+06	458279	636806	579383	227079	101507	360154	131177	136844	40881.5	34692.3	37036.7	113562	100281	205056	330852	613634	482597	421699	509278	131528	327511	108197	162312	309191	222899	632335	374818	992403
Orotate	0	0	0	0	0	0	0	0	0	0	0	0	0	0	0	0	0	0	0	0	0	0	0	0	0	0	0	0	0	0	0	0
Oxalate	2.01073e+07	1.72392e+07	2.18043e+07	2.35302e+07	2.34983e+07	2.44786e+07	2.40443e+07	1.79194e+07	1.44454e+07	1.82382e+07	1.80817e+07	1.81926e+07	1.91223e+07	1.94218e+07	1.85705e+07	1.86298e+07	2.16647e+07	1.92363e+07	2.26119e+07	2.26525e+07	2.4491e+07	2.27885e+07	2.63742e+07	2.02941e+07	1.87805e+07	1.73304e+07	1.76523e+07	1.93417e+07	2.01321e+07	1.80311e+07	2.04511e+07	2.17076e+07
Oxoadipate	0	0	0	0	0	0	0	0	0	0	0	0	0	0	0	0	0	0	0	0	0	0	0	0	0	0	0	0	0	0	0	0
Oxohexanoic acid	3.9082e+07	3.18351e+07	3.84389e+07	3.44983e+07	4.06653e+07	3.66566e+07	3.02817e+07	1.91206e+07	2.57765e+07	1.69411e+07	1.52355e+07	1.80523e+07	1.87636e+07	1.22367e+07	1.36587e+07	1.65179e+07	9.83625e+06	8.81732e+06	1.32081e+07	1.99644e+07	1.55896e+07	1.61783e+07	1.3578e+07	8.91466e+06	2.26961e+07	1.41505e+07	1.52225e+07	1.21929e+07	1.63471e+07	1.34976e+07	1.45635e+07	1.77483e+07
Oxoproline	0	0	0	0	0	0	0	0	0	0	0	0	0	0	0	0	0	0	0	0	0	0	0	0	0	0	0	0	0	0	0	0
P-DMEA	2.79581e+07	2.21251e+07	2.70575e+07	2.61073e+07	2.85346e+07	2.63795e+07	2.73573e+07	1.9184e+07	8.45706e+06	8.91639e+06	9.12367e+06	1.02497e+07	9.43439e+06	1.06728e+07	9.39917e+06	1.00261e+07	5.74727e+06	5.30442e+06	6.01721e+06	5.34665e+06	6.34642e+06	5.38984e+06	5.85723e+06	4.27657e+06	3.82887e+06	3.1891e+06	3.44618e+06	3.99619e+06	4.00376e+06	4.1685e+06	3.68407e+06	4.39228e+06
p-Hydroxyphenylacetate	0	0	0	0	0	0	0	0	0	0	0	0	0	0	0	0	0	0	0	0	0	0	0	0	0	0	0	0	0	0	0	0
Palatinose	0	0	62657.2	0	0	20023.8	299443	22805.5	0	282634	0	195414	49482.1	0	0	0	0	0	0	86271	66841.6	0	532012	0	150061	0	306688	26840.9	67533.4	221991	0	51916.8
Pantothenate	1.34639e+06	1.47585e+06	1.13483e+06	951366	1.27348e+06	1.34381e+06	1.58872e+06	587189	574847	501032	489352	595512	511625	504324	517154	499284	259772	262748	310026	246718	185655	304155	234341	173102	129212	0	178459	206075	172379	167175	140435	205350
PC (20:0)	0	0	0	0	0	0	0	0	0	0	0	0	0	0	0	0	0	0	0	0	0	0	0	0	0	0	0	0	0	0	0	0
PC (32:0)	1.72912e+08	1.38213e+08	1.34101e+08	1.15083e+08	1.30855e+08	1.22959e+08	1.15435e+08	6.57836e+07	1.11699e+08	9.22582e+07	8.95467e+07	9.4725e+07	9.48679e+07	8.65201e+07	8.84814e+07	9.06849e+07	2.5171e+08	2.15703e+08	2.46474e+08	2.30905e+08	2.23662e+08	2.3389e+08	2.19497e+08	1.09242e+08	2.07227e+08	1.79456e+08	1.76984e+08	1.68492e+08	1.81706e+08	1.65764e+08	1.70065e+08	1.62163e+08
PC (32:1)	1.09681e+09	9.71483e+08	9.65832e+08	8.04747e+08	8.64922e+08	8.20156e+08	7.70468e+08	4.52812e+08	6.05517e+08	5.43125e+08	5.62114e+08	5.81087e+08	5.54165e+08	5.19878e+08	5.19789e+08	5.27592e+08	2.81489e+08	2.37088e+08	2.73425e+08	2.45745e+08	2.39457e+08	2.49946e+08	2.3473e+08	1.23005e+08	2.189e+08	1.95426e+08	1.91808e+08	1.79262e+08	2.01527e+08	1.79775e+08	1.84137e+08	1.82173e+08
PC (32:2)	1.2762e+08	1.13481e+08	1.13536e+08	9.58189e+07	1.02333e+08	9.82485e+07	9.31331e+07	5.742e+07	6.77973e+07	6.44864e+07	6.67539e+07	6.77976e+07	6.65498e+07	6.18338e+07	6.0576e+07	6.31437e+07	3.04675e+07	2.60858e+07	2.93284e+07	2.66025e+07	2.6485e+07	2.82434e+07	2.5837e+07	1.43193e+07	2.16126e+07	2.13769e+07	2.17706e+07	1.97255e+07	2.1464e+07	1.90525e+07	2.02602e+07	2.03761e+07
PC (34:1)	1.41005e+09	1.21467e+09	1.17434e+09	9.83455e+08	1.07326e+09	9.95199e+08	9.42851e+08	5.6751e+08	8.29658e+08	7.07612e+08	7.12527e+08	7.54521e+08	7.24208e+08	6.70705e+08	6.75969e+08	6.92894e+08	1.51646e+09	1.33737e+09	1.50796e+09	1.36568e+09	1.32728e+09	1.39006e+09	1.31848e+09	6.723e+08	1.20082e+09	1.05632e+09	1.04926e+09	9.65674e+08	1.06771e+09	9.64595e+08	1.00684e+09	9.77989e+08
PC (34:2)	6.98125e+08	6.14777e+08	6.01865e+08	5.15119e+08	5.30254e+08	5.21228e+08	4.8526e+08	2.93803e+08	3.76664e+08	3.40873e+08	3.53505e+08	3.68734e+08	3.44899e+08	3.28367e+08	3.31092e+08	3.33821e+08	2.84076e+08	2.39023e+08	2.80982e+08	2.50354e+08	2.45776e+08	2.56076e+08	2.46397e+08	1.30491e+08	2.08628e+08	1.93785e+08	1.94195e+08	1.76623e+08	2.00389e+08	1.79997e+08	1.85715e+08	1.84198e+08
PC (36:1)	2.45189e+08	2.0402e+08	1.95496e+08	1.74228e+08	1.84744e+08	1.65989e+08	1.66018e+08	9.56192e+07	1.65051e+08	1.42959e+08	1.36893e+08	1.45217e+08	1.4218e+08	1.25762e+08	1.35851e+08	1.31099e+08	1.99853e+08	1.64457e+08	1.91374e+08	1.77107e+08	1.73123e+08	1.80282e+08	1.59907e+08	7.93098e+07	1.54694e+08	1.34831e+08	1.30857e+08	1.17913e+08	1.31823e+08	1.15925e+08	1.28009e+08	1.21424e+08
PC (36:2)	9.37162e+08	8.09179e+08	7.89564e+08	6.65605e+08	7.16762e+08	6.7849e+08	6.2477e+08	3.76862e+08	5.39212e+08	4.58525e+08	4.71327e+08	4.99307e+08	4.75832e+08	4.32792e+08	4.40914e+08	4.5091e+08	7.77415e+08	6.59595e+08	7.79382e+08	7.01823e+08	6.85299e+08	7.14886e+08	6.63935e+08	3.51445e+08	6.0803e+08	5.35666e+08	5.36078e+08	4.95026e+08	5.49009e+08	4.87768e+08	5.06973e+08	5.06154e+08
PC (36:4)	2.74871e+08	2.58128e+08	2.55151e+08	2.22153e+08	2.24192e+08	2.21745e+08	2.02193e+08	1.35774e+08	1.61467e+08	1.47043e+08	1.51381e+08	1.63081e+08	1.50522e+08	1.44157e+08	1.38687e+08	1.47087e+08	2.42974e+08	2.13353e+08	2.51744e+08	2.31608e+08	2.20682e+08	2.27181e+08	2.19111e+08	1.29131e+08	1.81808e+08	1.6946e+08	1.72604e+08	1.55992e+08	1.76865e+08	1.58163e+08	1.65624e+08	1.60971e+08
PC (36:5)	9.74576e+07	8.80731e+07	8.61976e+07	7.67633e+07	8.33326e+07	8.01894e+07	7.355e+07	5.17356e+07	5.36488e+07	5.01989e+07	5.23146e+07	5.81369e+07	5.30582e+07	5.12521e+07	5.11618e+07	5.13649e+07	5.89748e+07	5.05514e+07	6.24134e+07	5.61421e+07	5.20768e+07	5.51063e+07	5.16251e+07	3.19171e+07	4.50401e+07	3.89284e+07	4.15762e+07	3.92012e+07	4.33977e+07	4.04079e+07	4.16361e+07	4.14167e+07
PC (38:4)	2.71399e+08	2.41965e+08	2.42153e+08	1.99841e+08	2.16792e+08	1.9737e+08	1.90486e+08	1.19041e+08	1.54779e+08	1.38124e+08	1.45103e+08	1.48518e+08	1.44244e+08	1.34054e+08	1.30673e+08	1.31637e+08	2.00932e+08	1.70202e+08	1.99276e+08	1.83689e+08	1.77363e+08	1.85826e+08	1.75308e+08	9.38923e+07	1.48722e+08	1.32636e+08	1.35253e+08	1.21973e+08	1.37536e+08	1.25796e+08	1.30806e+08	1.30511e+08
PC (38:5)	2.86104e+08	2.65052e+08	2.66805e+08	2.30294e+08	2.39836e+08	2.30949e+08	2.19635e+08	1.27127e+08	1.64663e+08	1.49257e+08	1.5744e+08	1.63986e+08	1.56382e+08	1.47279e+08	1.41977e+08	1.50206e+08	3.39745e+08	2.78477e+08	3.43666e+08	3.05681e+08	3.0259e+08	3.06067e+08	2.90993e+08	1.65457e+08	2.43451e+08	2.26709e+08	2.29526e+08	2.10619e+08	2.31638e+08	2.13376e+08	2.30246e+08	2.13583e+08
PC (40:4)	1.16052e+07	8.12464e+06	1.03551e+07	5.90914e+06	8.58456e+06	7.54321e+06	6.8139e+06	4.14891e+06	5.7099e+06	5.33205e+06	4.47566e+06	4.7729e+06	4.76391e+06	5.8567e+06	4.01428e+06	4.32465e+06	2.33063e+07	1.82071e+07	2.34109e+07	2.13764e+07	2.00948e+07	1.84212e+07	1.93877e+07	1.11614e+07	1.5122e+07	1.54122e+07	1.44474e+07	1.40142e+07	1.72785e+07	1.40183e+07	1.44669e+07	1.3771e+07
PC (40:5)	4.29555e+07	4.11634e+07	4.45104e+07	3.32626e+07	3.5597e+07	3.45407e+07	3.31281e+07	2.03097e+07	2.67557e+07	2.36158e+07	2.41941e+07	2.52139e+07	2.49748e+07	2.24236e+07	2.28874e+07	2.21916e+07	7.50449e+07	6.35944e+07	7.45673e+07	6.67918e+07	6.68795e+07	6.73353e+07	6.26815e+07	3.50428e+07	5.42624e+07	5.19496e+07	5.25333e+07	4.62676e+07	5.2122e+07	4.67127e+07	5.11083e+07	4.72334e+07
PC (40:6)	1.1244e+08	1.03239e+08	1.00689e+08	8.38188e+07	8.94441e+07	8.74737e+07	8.01457e+07	5.11159e+07	5.93466e+07	5.59483e+07	5.87963e+07	6.12205e+07	5.97673e+07	5.60852e+07	5.26053e+07	5.39155e+07	9.32168e+07	8.13153e+07	9.58339e+07	8.58524e+07	8.10022e+07	8.51363e+07	8.26628e+07	4.73328e+07	6.50549e+07	6.15978e+07	6.1944e+07	5.61117e+07	6.23949e+07	5.82744e+07	6.04335e+07	5.76924e+07
PC (40:8)	1.41853e+07	1.59476e+07	1.32685e+07	1.43553e+07	1.39817e+07	1.35012e+07	1.426e+07	1.07186e+07	9.77276e+06	8.04045e+06	8.37634e+06	9.05396e+06	1.0648e+07	7.37632e+06	8.57472e+06	9.34041e+06	2.2314e+07	1.92361e+07	2.30544e+07	2.14796e+07	1.91873e+07	1.97687e+07	1.99815e+07	1.322e+07	1.48326e+07	1.33002e+07	1.50447e+07	1.41438e+07	1.58484e+07	1.25405e+07	1.37866e+07	1.60763e+07
PC (44:8)	0	0	0	0	0	0	0	90305.5	0	156768	0	0	0	0	0	0	1.55615e+06	1.39264e+06	1.45971e+06	2.01366e+06	1.67097e+06	1.46296e+06	1.17537e+06	786504	376674	356999	1.5757e+06	260210	1.40385e+06	671220	748218	750676
PE (32:0)	1.35349e+07	1.07406e+07	1.14291e+07	9.98318e+06	1.0029e+07	8.93608e+06	1.01506e+07	5.25288e+06	7.0262e+06	6.48812e+06	7.19825e+06	7.58503e+06	6.4787e+06	6.29328e+06	6.50187e+06	6.30295e+06	1.38582e+06	1.05687e+06	1.95537e+06	1.63231e+06	978894	1.5161e+06	723018	481461	998993	819493	1.53941e+06	1.27025e+06	477795	923941	928782	1.62406e+06
PE (34:1)	8.09071e+07	7.14129e+07	7.22544e+07	6.29925e+07	6.60337e+07	6.41348e+07	5.89247e+07	3.99946e+07	5.66622e+07	4.90735e+07	5.02873e+07	5.2905e+07	5.07092e+07	4.71196e+07	4.75142e+07	5.04976e+07	5.74447e+07	5.04445e+07	5.97278e+07	5.5362e+07	5.55256e+07	5.55308e+07	5.39523e+07	3.23931e+07	5.33191e+07	4.8465e+07	4.88893e+07	4.49478e+07	5.07263e+07	4.49071e+07	4.56638e+07	4.72905e+07
PE (34:2)	1.85608e+07	1.59559e+07	1.5762e+07	1.48653e+07	1.39579e+07	1.41243e+07	1.32546e+07	9.36722e+06	1.20769e+07	1.01924e+07	1.13586e+07	1.12166e+07	1.10047e+07	9.7145e+06	1.03954e+07	1.14147e+07	7.90177e+06	6.34963e+06	8.31701e+06	7.176e+06	7.1186e+06	7.27844e+06	7.54615e+06	4.12329e+06	6.92566e+06	5.8939e+06	6.72948e+06	5.96766e+06	6.4765e+06	6.4571e+06	6.45561e+06	6.05036e+06
PE (36:1)	2.49063e+08	2.15436e+08	2.20548e+08	1.79948e+08	1.99217e+08	1.91137e+08	1.80936e+08	1.14155e+08	1.84347e+08	1.56019e+08	1.56893e+08	1.67673e+08	1.6044e+08	1.47537e+08	1.57192e+08	1.5907e+08	1.68289e+08	1.47535e+08	1.7425e+08	1.58655e+08	1.59073e+08	1.594e+08	1.51816e+08	8.50184e+07	1.63392e+08	1.39269e+08	1.37062e+08	1.33205e+08	1.41713e+08	1.28418e+08	1.36193e+08	1.30286e+08
PE (36:2)	1.01574e+08	8.75305e+07	9.06591e+07	7.79722e+07	8.262e+07	8.13164e+07	7.72379e+07	5.39514e+07	6.99741e+07	6.03083e+07	6.6385e+07	6.85772e+07	6.55732e+07	6.10435e+07	6.30735e+07	6.36529e+07	8.09733e+07	7.18929e+07	8.45995e+07	7.70684e+07	7.53296e+07	7.87142e+07	7.61143e+07	4.68299e+07	7.40772e+07	7.09774e+07	6.78531e+07	6.46924e+07	7.2471e+07	6.44216e+07	6.56971e+07	6.61451e+07
PE (36:3)	1.94352e+07	1.65659e+07	1.72953e+07	1.35744e+07	1.4166e+07	1.70167e+07	1.58617e+07	1.13147e+07	1.28639e+07	9.57817e+06	1.19605e+07	1.23411e+07	1.34796e+07	9.50654e+06	1.24654e+07	1.05266e+07	1.2939e+07	1.06066e+07	1.4201e+07	1.22444e+07	1.33347e+07	1.36512e+07	1.08955e+07	6.74748e+06	1.10033e+07	1.06867e+07	9.45595e+06	1.03105e+07	1.04782e+07	9.64743e+06	1.13291e+07	1.13272e+07
PE (36:6)	0	0	0	0	0	0	0	0	0	0	0	0	0	0	0	0	0	0	0	0	0	0	0	0	0	0	0	0	0	0	0	0
PE (38:1)	6.47352e+07	5.05138e+07	5.13787e+07	4.36164e+07	4.77472e+07	4.70213e+07	4.17696e+07	2.65295e+07	4.02222e+07	3.4166e+07	3.53653e+07	3.44563e+07	3.40835e+07	3.11862e+07	3.13548e+07	3.22569e+07	7.0095e+07	6.15975e+07	6.76283e+07	6.32564e+07	6.091e+07	6.48264e+07	5.75985e+07	3.12399e+07	5.53655e+07	5.0603e+07	5.06368e+07	4.58748e+07	4.84883e+07	4.4761e+07	4.774e+07	4.49481e+07
PE (38:3)	5.2159e+07	4.7744e+07	4.59978e+07	4.39198e+07	4.26296e+07	4.27687e+07	3.90469e+07	2.8626e+07	3.87806e+07	3.58674e+07	3.62933e+07	3.64301e+07	3.86569e+07	3.43571e+07	3.57197e+07	3.74948e+07	2.36741e+07	2.19739e+07	2.37713e+07	2.41924e+07	2.2656e+07	2.49026e+07	2.46069e+07	1.38319e+07	2.06711e+07	2.20759e+07	1.80083e+07	1.98451e+07	2.10399e+07	1.95617e+07	2.08326e+07	2.06274e+07
PE (38:4)	1.37792e+08	1.23227e+08	1.21043e+08	1.08165e+08	1.1799e+08	1.14279e+08	1.08896e+08	8.07031e+07	1.06902e+08	9.54446e+07	9.62336e+07	1.02154e+08	9.89987e+07	8.90725e+07	9.40186e+07	9.73565e+07	1.75501e+08	1.59127e+08	1.88543e+08	1.76316e+08	1.77041e+08	1.77915e+08	1.70867e+08	1.08226e+08	1.65842e+08	1.52362e+08	1.53001e+08	1.48897e+08	1.59439e+08	1.48359e+08	1.56995e+08	1.50945e+08
PE (38:5)	4.64354e+07	4.44175e+07	4.2316e+07	4.24205e+07	4.06036e+07	3.96932e+07	3.74907e+07	2.92881e+07	3.26199e+07	3.0724e+07	3.34764e+07	3.37686e+07	3.30918e+07	3.06174e+07	2.94243e+07	3.20568e+07	6.81726e+07	6.03941e+07	6.94241e+07	6.45369e+07	6.71232e+07	6.27155e+07	6.40403e+07	4.08341e+07	5.66098e+07	5.51923e+07	5.47373e+07	5.33758e+07	5.84501e+07	5.46474e+07	5.51879e+07	5.36618e+07
PE (38:6)	1.12178e+07	1.11836e+07	8.57508e+06	9.84444e+06	8.66531e+06	8.67919e+06	8.69281e+06	7.64316e+06	6.79979e+06	5.49008e+06	6.54973e+06	7.48776e+06	6.6089e+06	5.58928e+06	5.4699e+06	4.60768e+06	2.05427e+07	1.85353e+07	2.14526e+07	1.91525e+07	2.0123e+07	1.89822e+07	1.95472e+07	1.20765e+07	1.72367e+07	1.65747e+07	1.61168e+07	1.62253e+07	1.7004e+07	1.55453e+07	1.77209e+07	1.60498e+07
PE (40:5)	3.7403e+07	3.69635e+07	3.36609e+07	3.38336e+07	3.45609e+07	3.35366e+07	2.99286e+07	2.30941e+07	2.87086e+07	2.44213e+07	2.66654e+07	2.88089e+07	2.83495e+07	2.39313e+07	2.49107e+07	2.68644e+07	5.14811e+07	4.32156e+07	5.31001e+07	5.0295e+07	5.03281e+07	5.10183e+07	4.92737e+07	2.95316e+07	4.40956e+07	4.25418e+07	3.94858e+07	3.92939e+07	4.32454e+07	3.83195e+07	3.98876e+07	4.09572e+07
PE (40:7)	1.49128e+07	1.323e+07	1.21815e+07	1.34919e+07	1.28161e+07	1.44813e+07	1.25554e+07	1.06455e+07	1.26079e+07	8.99771e+06	1.00231e+07	1.13495e+07	9.74195e+06	8.61502e+06	9.58124e+06	9.72854e+06	3.05872e+07	2.74219e+07	3.15224e+07	3.07799e+07	2.96536e+07	3.12419e+07	2.1015e+07	2.10649e+07	2.58462e+07	2.52091e+07	2.65098e+07	2.55972e+07	2.75579e+07	2.47101e+07	2.73807e+07	2.60481e+07
Pentanoate	0	0	0	0	0	0	0	0	0	0	0	0	0	0	0	0	0	0	0	0	0	0	0	0	0	0	0	0	0	0	0	0
Pentitols	0	0	0	0	0	0	0	0	0	0	0	0	0	0	0	0	0	0	0	0	0	0	0	0	0	0	0	0	0	0	0	0
Pentoses	26670.9	115401	46194.1	22094	95569.1	29086.4	111564	138876	45488.1	42855.9	32966	28919.1	15572.8	39485.1	58769.4	50933.2	36452.5	0	32134	0	20153.2	20939.7	46590.7	63762.7	49715.5	23062.8	56889.2	28722.2	16519.2	40350.5	0	99843.5
Phenethylamine	0	0	0	0	0	0	0	0	0	0	0	0	0	0	0	0	0	0	0	0	0	0	0	0	0	0	0	0	0	0	0	0
Phenylacetate	0	0	0	0	0	0	0	0	0	0	0	0	0	0	0	0	0	0	0	0	0	0	0	0	0	0	0	0	0	0	0	0
Phenylalanine	9.53483e+06	7.67787e+06	1.08765e+07	7.73165e+06	8.18647e+06	8.13295e+06	8.27514e+06	4.80909e+06	5.19289e+06	5.60571e+06	3.35118e+06	3.76975e+06	3.87139e+06	3.66907e+06	4.00578e+06	3.49518e+06	2.62915e+06	2.62018e+06	3.32089e+06	2.20517e+06	4.10335e+06	2.66731e+06	2.49531e+06	1.88189e+06	1.38222e+06	2.09908e+06	1.64001e+06	1.72997e+06	2.01407e+06	1.95125e+06	1.81116e+06	2.50136e+06
Phenylethanolamine	0	0	0	0	0	0	0	0	0	0	0	0	0	0	0	0	0	0	0	0	0	0	0	0	0	0	0	0	0	0	0	0
Phenylpyruvate	0	0	0	0	0	0	0	0	0	0	0	0	0	0	0	0	0	0	0	0	0	0	0	0	0	0	0	0	0	0	0	0
Phosphoenolpyruvate	0	0	0	0	30192.1	0	0	0	0	0	0	0	0	0	0	10288.3	0	0	15966.7	10239.3	10832	12151.4	0	40966.1	0	0	0	0	0	0	0	0
Phosphoethanolamine	2.57936e+07	1.9211e+07	2.4142e+07	2.47077e+07	2.51843e+07	2.6185e+07	2.67781e+07	1.83085e+07	9.04732e+06	8.44754e+06	9.2838e+06	9.73187e+06	9.1809e+06	1.05947e+07	9.77159e+06	1.0283e+07	821115	789565	792360	752772	566097	680822	646010	732567	620293	275441	256315	507555	728987	548678	701694	342236
Phosphonoacetate	0	0	0	0	0	0	0	0	0	0	0	0	0	0	0	0	0	0	0	0	0	0	0	0	0	0	0	0	0	0	0	0
Phosphorylcholine	1.47614e+09	1.17351e+09	1.40659e+09	1.30111e+09	1.4856e+09	1.34224e+09	1.35402e+09	7.65038e+08	3.37996e+08	4.16696e+08	4.27498e+08	5.12765e+08	4.57698e+08	4.89673e+08	4.54695e+08	4.99013e+08	2.69591e+08	2.82968e+08	3.35096e+08	2.62007e+08	2.99834e+08	2.64985e+08	2.88866e+08	1.54958e+08	1.74305e+08	1.59314e+08	1.72807e+08	1.77218e+08	2.12662e+08	2.01848e+08	1.71601e+08	2.12773e+08
Phosphoserine	695515	321453	485311	587144	804177	682760	677713	191240	0	0	0	0	0	0	0	0	230222	231013	222242	135788	329124	108484	398798	113142	0	44326	57868.8	0	41315.2	163135	40336.1	78840.5
PI (32:0)	1.30425e+06	1.21288e+06	621072	1.00895e+06	498170	710777	666652	386987	835217	706408	736944	647869	673308	733324	680442	699144	661106	927879	838504	645754	646042	662819	589666	274428	416138	723930	879940	618743	722859	803176	592051	611964
Pipecolate	0	0	0	0	0	0	0	0	0	0	0	0	0	0	0	0	0	0	0	0	0	0	0	0	0	0	0	0	0	0	0	0
Platelet-activating factor	5.76228e+07	5.31648e+07	4.97478e+07	4.44064e+07	4.64948e+07	4.61436e+07	4.38997e+07	2.14327e+07	2.71627e+07	2.33806e+07	2.09059e+07	2.05629e+07	2.13432e+07	2.05905e+07	1.99871e+07	2.09244e+07	1.87422e+07	1.5045e+07	1.65013e+07	1.45187e+07	1.31201e+07	1.40712e+07	1.35101e+07	6.95268e+06	1.00508e+07	8.1868e+06	7.48858e+06	6.6579e+06	7.73077e+06	7.07944e+06	6.84774e+06	7.0183e+06
Pregnenolone sulfate	0	0	0	0	0	0	0	0	0	0	0	0	0	0	0	0	0	0	0	0	0	0	0	0	0	0	0	0	0	0	0	0
Proline	1.23099e+08	1.10974e+08	1.23274e+08	1.30311e+08	1.21271e+08	1.21694e+08	1.24494e+08	5.88275e+07	4.94419e+07	4.87675e+07	5.32666e+07	5.5133e+07	5.22963e+07	5.06528e+07	4.86612e+07	5.46945e+07	5.94813e+07	5.99553e+07	6.87039e+07	6.29151e+07	6.33669e+07	5.49332e+07	5.78161e+07	2.7946e+07	4.98745e+07	4.27675e+07	5.13676e+07	4.70296e+07	5.22616e+07	5.73876e+07	4.8172e+07	4.57798e+07
Propionyl-CoA	0	0	0	0	0	0	0	0	0	0	0	0	0	0	0	0	0	0	0	0	0	0	0	0	0	0	0	0	0	0	0	0
PS (34:2)	4.21622e+06	3.26286e+06	3.04451e+06	2.71968e+06	3.18322e+06	2.59518e+06	2.73066e+06	1.02776e+06	1.93763e+06	2.0843e+06	1.81857e+06	1.69872e+06	1.40747e+06	1.94816e+06	1.39912e+06	1.61194e+06	1.03639e+06	882554	646572	880714	748357	614218	593081	319281	353375	522138	610207	293496	668916	314843	370720	437594
PS (36:1)	1.78641e+08	1.58392e+08	1.55099e+08	1.33995e+08	1.49678e+08	1.30429e+08	1.23268e+08	7.51147e+07	1.39778e+08	1.29735e+08	1.2271e+08	1.3309e+08	1.34604e+08	1.14692e+08	1.25295e+08	1.32329e+08	9.04538e+07	8.18434e+07	8.9721e+07	8.74705e+07	8.07577e+07	8.60356e+07	8.18561e+07	4.28402e+07	8.65996e+07	8.08367e+07	7.48652e+07	7.7814e+07	7.87527e+07	7.23212e+07	7.62678e+07	7.16103e+07
PS (36:4)	755535	666685	453109	561737	608534	471446	493082	258235	564068	330469	252504	133342	465417	290598	381215	356171	812311	791822	730447	628730	476862	834558	739633	460412	538023	777367	496221	508277	646577	608377	261877	796382
PS (38:3)	3.34984e+07	3.02969e+07	2.75466e+07	2.573e+07	2.83793e+07	2.54513e+07	2.28703e+07	1.37044e+07	2.24615e+07	2.09641e+07	1.91952e+07	2.1503e+07	2.2314e+07	2.07695e+07	2.05567e+07	2.18181e+07	7.94206e+06	6.66304e+06	7.64016e+06	7.70035e+06	6.98222e+06	7.45225e+06	6.55387e+06	3.21551e+06	6.24267e+06	6.16111e+06	5.63862e+06	5.86415e+06	5.9103e+06	5.40004e+06	5.94307e+06	5.85822e+06
PS (38:5)	2.61485e+06	2.83585e+06	2.23446e+06	1.83016e+06	2.61723e+06	1.68229e+06	1.98746e+06	687763	1.76908e+06	1.21706e+06	1.21877e+06	1.64451e+06	1.14886e+06	946105	1.30246e+06	1.16111e+06	2.18089e+06	1.75835e+06	2.26459e+06	1.80599e+06	1.85828e+06	1.93059e+06	1.81996e+06	852016	1.3991e+06	1.45307e+06	1.53557e+06	1.37828e+06	1.60761e+06	1.37209e+06	947092	1.26004e+06
PS (38:6)	482243	216752	282931	165942	155703	0	145394	156655	77932.3	164198	0	202961	91993	0	0	189409	237520	224682	373854	455492	125043	83631.7	167343	35408.8	0	0	0	364073	45841.4	56519.4	264134	188847
PS (40:5)	3.36762e+07	2.99458e+07	2.8904e+07	2.52847e+07	2.861e+07	2.52828e+07	2.3968e+07	1.45469e+07	2.23436e+07	2.07877e+07	2.02421e+07	2.04877e+07	2.15552e+07	1.9666e+07	1.89096e+07	2.05609e+07	1.4305e+07	1.31745e+07	1.53918e+07	1.39047e+07	1.26203e+07	1.31545e+07	1.29976e+07	6.46987e+06	1.14914e+07	1.16823e+07	1.03428e+07	1.05849e+07	1.09911e+07	9.60739e+06	1.04182e+07	1.0212e+07
PS (40:6)	4.15974e+07	3.98638e+07	3.68091e+07	3.25667e+07	3.4842e+07	3.18789e+07	2.97988e+07	1.84929e+07	2.60935e+07	2.31417e+07	2.2532e+07	2.54903e+07	2.35378e+07	2.3001e+07	2.29383e+07	2.46401e+07	1.39357e+07	1.32164e+07	1.5157e+07	1.4435e+07	1.24605e+07	1.41744e+07	1.35422e+07	7.00657e+06	1.15061e+07	1.1157e+07	1.06216e+07	1.07082e+07	1.10058e+07	1.02541e+07	1.00772e+07	1.03259e+07
PS (40:7)	1.06494e+06	1.41557e+06	1.0046e+06	1.0867e+06	934959	845424	756078	408469	838142	280793	342797	791316	489063	229884	442729	401145	1.27383e+06	633549	755828	680538	802183	941217	435652	238404	621182	489332	543821	406151	707439	564173	321078	391504
Psicose	0	0	0	0	0	0	0	0	0	0	0	0	0	0	0	0	0	0	0	0	0	0	0	0	0	0	0	0	0	0	0	0
Purine	0	0	0	0	0	0	0	0	0	0	0	0	0	0	0	0	0	0	0	0	0	0	0	0	0	0	0	0	0	0	0	0
Pyridoxal	0	0	0	0	0	0	0	0	0	0	0	0	0	0	0	0	0	0	0	0	0	0	0	0	0	0	0	0	0	0	0	0
Pyridoxal phosphate	0	0	0	0	0	0	0	0	0	0	0	0	0	0	0	0	0	0	0	0	0	0	0	0	0	0	0	0	0	0	0	0
Pyridoxamine	0	0	0	0	0	0	0	0	0	0	0	0	0	0	0	0	0	0	0	0	0	0	0	0	0	0	0	0	0	0	0	0
Pyridoxine	0	0	0	0	0	0	0	0	0	0	0	0	0	0	0	0	784738	464259	888471	559564	444404	702416	493108	213362	0	0	190470	133900	70708.1	0	0	0
Pyrocatechol	0	0	0	0	0	0	0	0	0	0	0	0	0	0	0	0	0	0	0	0	0	0	0	0	0	0	0	0	0	0	0	0
Pyroglutamate	0	0	0	0	0	0	0	0	0	0	0	0	0	0	0	0	0	0	0	0	0	0	0	0	0	0	0	0	0	0	0	0
Pyrrole 2-carboxylate	0	0	0	0	0	0	0	0	0	0	0	0	0	0	0	0	0	0	0	0	0	0	0	0	0	0	0	0	0	0	0	0
Pyruvate	0	0	0	0	0	0	0	0	0	0	0	0	0	0	0	0	0	0	0	0	0	0	0	0	0	0	0	0	0	0	0	0
Quinate	0	0	0	0	0	0	0	0	0	0	0	0	0	0	0	0	0	0	0	0	0	0	0	0	0	0	0	0	0	0	0	0
Quinolinate	57003.7	56723.3	108858	60580.8	0	51843.2	92633.1	141169	0	0	0	97693.4	0	0	56926	0	79831.6	62728.3	66268.2	93206.5	61800.8	0	0	139437	0	74672.1	68336.1	88472.9	103862	50654.6	103758	76051.4
Quinoline	0	0	0	0	0	0	0	0	0	0	0	0	0	0	0	0	0	0	0	0	0	0	0	0	0	0	0	0	0	0	0	0
Raffinose	0	0	0	0	0	0	0	0	0	0	0	0	0	0	0	0	0	0	0	0	0	0	0	0	0	0	0	0	0	0	0	0
Resorcinol monoacetate	3.89723e+06	8.81791e+06	3.957e+06	3.99725e+06	3.84635e+06	4.4794e+06	6.73933e+06	2.00301e+06	4.9008e+06	6.42964e+06	7.041e+06	4.31695e+06	6.62964e+06	6.2436e+06	5.57636e+06	4.65743e+06	6.5709e+06	6.52096e+06	4.73441e+06	5.45615e+06	3.78052e+06	4.56213e+06	4.21931e+06	2.68546e+06	6.57627e+06	6.70835e+06	4.33043e+06	4.05616e+06	3.89864e+06	4.46339e+06	6.64203e+06	5.46974e+06
Riboflavin	0	0	0	0	0	0	0	0	0	0	0	0	0	0	0	0	0	0	0	0	0	0	0	0	0	0	0	0	0	0	0	0
Ribulose/Ribose/Xylulose 5-phosphate	55950.4	46951.8	19027.1	0	15481	0	0	0	0	0	64687.2	0	32603	20117.6	23383.4	28876.1	58953.4	0	55349.8	0	0	0	0	0	0	0	0	0	0	42751.3	27555.8	35665.3
Rosmarinate	0	0	0	0	0	0	0	0	0	0	0	0	0	0	0	0	0	0	0	0	0	0	0	0	0	0	0	0	0	0	0	0
S-Acetylthioethanolamine	0	0	0	0	0	0	0	0	0	0	0	0	0	0	0	0	0	0	0	0	0	0	0	0	0	0	0	0	0	0	0	0
S-Adenosylhomocysteine	213634	217391	0	0	71445.1	310775	346709	0	0	0	0	0	0	0	0	0	0	0	0	0	0	0	138766	0	0	0	0	0	0	0	0	0
S-Adenosylmethionine	3.06215e+07	2.24072e+07	2.66381e+07	2.41001e+07	2.90582e+07	2.71107e+07	2.79403e+07	1.26145e+07	5.67619e+06	7.03996e+06	6.66394e+06	8.06748e+06	6.55235e+06	7.9157e+06	7.46191e+06	7.94908e+06	1.37319e+07	1.21259e+07	1.67311e+07	1.14025e+07	1.45504e+07	1.23812e+07	1.47465e+07	7.02567e+06	8.3734e+06	7.46979e+06	7.53121e+06	7.98271e+06	9.52656e+06	1.06963e+07	7.81887e+06	9.73763e+06
S-Carboxymethylcysteine	0	0	0	0	0	0	0	0	0	0	0	0	0	0	0	0	0	0	0	0	0	0	0	0	0	0	0	0	0	0	0	0
S-Hexyl glutathione	0	0	0	0	0	0	0	0	0	0	0	0	0	0	0	0	0	0	0	0	0	0	0	0	0	0	0	0	0	0	0	0
S-Methylthioadenosine	833499	1.07484e+06	967912	910982	1.21221e+06	797646	767625	207981	66023.8	126390	186323	238905	177364	80581.5	247768	199859	334591	103611	374922	192406	355971	649242	413492	64508.1	130728	175426	311980	153059	284269	397807	227795	341023
SAICAR	0	0	0	0	0	0	0	0	0	0	0	0	0	0	0	0	0	0	0	0	0	0	0	0	0	0	0	0	0	0	0	0
Salicylamide	0	0	0	0	0	0	0	0	0	0	0	0	0	0	0	0	0	0	0	0	0	0	0	0	0	0	0	0	0	0	0	0
Salicylate	1.04426e+07	6.95311e+06	1.10961e+07	7.68469e+06	6.52108e+06	6.97037e+06	7.88567e+06	6.39609e+06	7.24687e+06	7.41074e+06	5.45042e+06	9.32387e+06	6.81572e+06	7.8468e+06	7.19881e+06	9.79456e+06	7.53143e+06	5.11806e+06	9.53224e+06	9.51974e+06	9.41704e+06	1.14199e+07	1.14691e+07	5.49586e+06	1.16173e+07	5.95223e+06	1.16858e+07	7.68598e+06	9.60015e+06	1.06857e+07	7.92396e+06	1.1953e+07
Salsolinol	0	0	0	0	0	0	0	0	0	0	0	0	0	0	0	0	0	0	0	0	0	0	0	0	0	0	0	0	0	0	0	0
Sarcosine	0	0	0	0	0	0	0	0	0	0	0	0	0	0	0	0	0	0	0	0	0	0	0	0	0	0	0	0	0	0	0	0
Sebacate	0	0	0	0	0	0	0	0	0	0	0	0	0	0	0	0	0	0	0	0	0	0	0	0	0	0	0	0	0	0	0	0
Sedoheptulose 7-phosphate	516060	195978	485137	64503	327827	268704	66985.8	219654	0	0	68127.7	0	0	0	0	0	0	0	99741.5	49441.6	0	0	0	36813.9	0	0	91966.7	0	0	0	86533	0
Selenomethionine	0	0	0	0	0	0	0	0	0	0	0	0	0	0	0	0	0	0	0	0	0	0	0	0	0	0	0	0	0	0	0	0
Ser-Arg	0	0	0	0	0	0	0	0	0	0	0	0	0	0	0	0	0	0	0	0	0	0	0	0	0	0	0	0	0	0	0	0
Serine	4.27836e+06	4.4319e+06	6.00412e+06	4.42296e+06	4.19158e+06	3.99656e+06	4.70145e+06	2.23688e+06	1.14231e+06	1.53781e+06	1.02755e+06	1.49164e+06	1.13214e+06	1.05983e+06	823964	1.13495e+06	2.59338e+06	2.67831e+06	3.18731e+06	2.27057e+06	2.94887e+06	2.75214e+06	2.54281e+06	1.75446e+06	1.50929e+06	1.57337e+06	1.68799e+06	1.56898e+06	1.82443e+06	1.87612e+06	1.93738e+06	1.86845e+06
Serotonin	0	0	0	0	0	0	0	0	0	0	0	0	0	0	0	0	0	0	0	0	0	0	0	0	0	0	0	0	0	0	0	0
Shikimate	0	0	0	0	0	0	0	0	0	0	0	0	0	0	0	0	0	0	0	0	0	0	0	0	0	0	0	0	0	0	0	0
SM (d18:1/14:0)	3.5181e+07	2.98446e+07	2.81566e+07	2.42555e+07	2.63374e+07	2.47161e+07	2.29587e+07	1.24684e+07	1.77238e+07	1.64852e+07	1.56738e+07	1.62949e+07	1.64691e+07	1.52814e+07	1.44152e+07	1.51633e+07	9.18314e+06	6.71892e+06	8.23349e+06	7.67641e+06	7.4701e+06	6.82494e+06	6.77333e+06	3.23872e+06	5.66684e+06	5.32573e+06	5.11955e+06	5.1187e+06	5.3869e+06	4.41593e+06	5.24347e+06	4.78522e+06
SM (d18:1/16:0)	8.61695e+08	7.32438e+08	7.04554e+08	5.86003e+08	6.49677e+08	5.97658e+08	5.6407e+08	3.22146e+08	4.77432e+08	4.43839e+08	4.24606e+08	4.48436e+08	4.34605e+08	4.07082e+08	4.19178e+08	4.28318e+08	1.29372e+08	1.1754e+08	1.31252e+08	1.21547e+08	1.149e+08	1.16864e+08	1.11408e+08	5.46923e+07	1.03518e+08	9.4428e+07	9.21699e+07	8.60967e+07	9.65994e+07	8.37768e+07	8.8039e+07	8.67369e+07
SM (d18:1/18:0)	4.25387e+07	3.29787e+07	3.15214e+07	2.75553e+07	3.12845e+07	2.65208e+07	2.7405e+07	1.54582e+07	2.55427e+07	2.34249e+07	2.27831e+07	2.47776e+07	2.37825e+07	1.97324e+07	2.43378e+07	2.24675e+07	3.91451e+06	3.40472e+06	3.95729e+06	3.40659e+06	3.17271e+06	3.24815e+06	3.23614e+06	1.28561e+06	3.07096e+06	1.97173e+06	2.54619e+06	2.4474e+06	2.20828e+06	1.87174e+06	1.74746e+06	1.80537e+06
SM (d18:1/18:1)	5.26072e+06	4.43833e+06	4.45144e+06	4.01637e+06	3.83305e+06	4.2007e+06	3.43e+06	2.24899e+06	2.30216e+06	1.87664e+06	1.54419e+06	2.45366e+06	2.49425e+06	2.03105e+06	1.85627e+06	1.49929e+06	1.73514e+06	1.15791e+06	2.15088e+06	1.84711e+06	1.43928e+06	1.66279e+06	1.23686e+06	567482	1.46949e+06	960455	873617	791517	943886	365163	710367	834279
SM (d18:1/22:0)	2.23691e+07	1.74691e+07	1.81769e+07	1.45363e+07	1.65344e+07	1.77118e+07	1.48914e+07	1.01108e+07	2.07092e+07	1.64746e+07	1.67671e+07	1.73402e+07	1.73826e+07	1.44703e+07	1.72497e+07	1.77184e+07	319838	103224	0	0	108453	175419	63262.7	0	41345.6	64359.6	86823.6	220551	187490	61193.3	81144.4	0
Sphinganine	1.18864e+07	9.8351e+06	1.05835e+07	8.91858e+06	9.91514e+06	1.03537e+07	9.64873e+06	6.19039e+06	1.14738e+07	1.16036e+07	1.11357e+07	1.14561e+07	1.12818e+07	1.04458e+07	1.04506e+07	1.026e+07	1.03864e+07	1.02447e+07	1.08913e+07	1.04543e+07	1.0654e+07	1.0485e+07	9.90099e+06	5.26353e+06	1.09883e+07	1.11335e+07	1.09123e+07	1.03726e+07	1.1254e+07	1.06379e+07	1.00528e+07	1.0235e+07
Sphingosine	0	0	0	0	0	0	0	0	0	0	0	0	0	0	0	0	0	0	0	0	0	0	0	0	0	0	0	0	0	0	0	0
Stachydrine	0	0	0	0	0	0	0	0	0	0	0	0	0	0	0	0	0	0	0	0	0	0	0	0	0	0	0	0	0	0	0	0
Stachyose	0	0	0	0	0	0	0	0	0	0	0	0	0	0	0	0	0	0	0	0	0	0	0	0	0	0	0	0	0	0	0	0
Suberate	0	0	1.41855e+06	0	0	1.13935e+06	1.18765e+06	1.22944e+06	0	9.46726e+06	1.09913e+06	1.67011e+06	1.20032e+06	0	1.24268e+06	965172	1.05828e+06	0	1.02012e+06	1.47838e+06	1.10356e+06	1.81043e+06	1.61922e+06	1.66995e+06	0	0	1.81811e+06	0	1.23754e+06	1.38512e+06	1.63996e+06	1.40849e+06
Succinate	3.33446e+06	3.4601e+06	6.45664e+06	4.27324e+06	4.11355e+06	3.81951e+06	5.88062e+06	2.4273e+06	2.83254e+06	4.73379e+06	4.35649e+06	3.57014e+06	2.64317e+06	2.08013e+06	2.3321e+06	4.3805e+06	2.69359e+06	6.5893e+06	4.45201e+06	3.64303e+06	6.45063e+06	3.60328e+06	3.18414e+06	2.56376e+06	4.89649e+06	6.90045e+06	4.71154e+06	2.08788e+06	3.4924e+06	3.5941e+06	2.54617e+06	4.05649e+06
Succinyl-CoA	0	0	0	0	0	0	0	0	0	0	0	0	0	0	0	0	0	0	0	0	0	0	0	0	0	0	0	0	0	0	0	0
Sucrose	0	0	0	0	0	0	0	0	0	0	0	0	0	0	0	0	0	0	0	0	0	0	0	0	0	0	0	0	0	0	0	0
Sulfolactate	1.33983e+07	1.32415e+06	9.34089e+06	2.63818e+06	5.04121e+06	7.34646e+06	1.93941e+06	4.94992e+06	7.43602e+06	5.73216e+06	4.70729e+06	8.60352e+06	6.56613e+06	3.46487e+06	1.28145e+06	5.84996e+06	1.71052e+06	1.42876e+06	7.73763e+06	6.45759e+06	8.41148e+06	1.2625e+07	2.38892e+06	2.20791e+06	7.12386e+06	4.80755e+06	4.47684e+06	2.88898e+06	4.81917e+06	1.62436e+07	4.6009e+06	1.28773e+07
Tartrate	0	0	0	0	0	0	0	0	0	0	0	0	0	0	0	0	0	0	0	0	0	0	0	0	0	0	0	0	0	0	0	0
Taurine	3.97129e+07	3.59475e+07	3.76064e+07	3.62172e+07	3.82946e+07	3.71597e+07	3.63666e+07	2.22626e+07	1.62787e+07	1.64143e+07	1.52579e+07	1.59668e+07	1.62653e+07	1.58405e+07	1.57251e+07	1.56774e+07	3.3598e+07	3.35316e+07	3.47067e+07	3.25113e+07	3.44466e+07	3.11219e+07	3.28469e+07	2.15841e+07	2.52054e+07	2.59586e+07	2.68892e+07	2.55973e+07	2.72386e+07	2.78555e+07	2.56784e+07	2.62904e+07
Taurocyamine	0	0	0	0	0	0	0	0	0	0	0	0	0	0	0	0	0	0	0	0	0	0	0	0	0	0	0	0	0	0	0	0
Theanine	61351.6	166170	0	121907	90449.6	0	113635	0	0	0	66441	62666.5	0	106091	0	0	0	0	0	0	96700.1	0	85772.6	0	0	0	0	0	0	0	96693.7	0
Theophylline	0	0	0	0	0	0	0	0	0	0	0	0	0	0	0	0	0	0	0	0	0	0	0	0	0	0	0	0	0	0	0	0
Thiamine	0	0	0	0	0	0	0	0	34178.3	0	0	0	0	0	0	0	0	0	0	0	0	0	0	0	73566.6	0	0	0	0	0	0	0
Thiamine monophosphate	41541.9	0	0	0	0	0	39608.3	30983	0	0	0	34035.8	0	0	0	0	0	0	0	32770.8	0	0	0	0	0	0	0	0	0	0	0	0
Thioproline	0	0	0	0	0	0	0	0	0	0	0	0	0	0	0	0	0	0	0	0	0	0	0	0	0	0	0	0	0	0	0	0
Thiopurine S-methylether	0	0	0	0	0	0	0	0	0	0	0	0	0	0	0	0	0	0	0	0	0	0	0	0	0	0	0	0	0	0	0	0
Thr-Arg	0	0	0	0	0	0	0	0	0	0	0	0	0	0	0	0	0	0	0	0	0	0	0	0	0	0	0	0	0	0	0	0
Threonate	0	0	0	0	0	0	0	0	0	0	0	0	0	0	0	0	0	0	0	0	0	0	0	0	0	0	0	0	0	0	0	0
Threonine	0	0	0	0	0	0	0	0	0	0	0	0	0	0	0	0	0	0	0	0	0	0	0	0	0	0	0	0	0	0	0	0
Thymidine	0	0	0	0	0	0	0	0	0	0	0	0	0	0	0	0	0	0	0	0	0	0	0	0	0	0	0	0	0	0	0	0
Thymidine monophosphate	0	0	0	0	0	0	0	0	0	0	0	0	0	0	0	0	0	0	0	0	0	0	0	0	0	0	0	0	0	0	0	0
Thymine	0	0	0	0	0	0	0	0	0	0	0	0	0	0	0	0	0	0	0	0	0	0	0	0	0	0	0	0	0	0	0	0
Thyrotropin releasing hormone	0	0	0	0	0	0	0	0	0	0	0	0	0	0	0	0	0	0	0	0	0	0	0	0	0	0	0	0	0	0	0	0
trans-4-Hydroxyproline	3.91049e+07	4.83268e+07	4.51644e+07	4.09565e+07	4.10224e+07	4.01384e+07	3.79669e+07	6.8581e+07	1.92156e+07	2.11952e+07	2.1839e+07	2.18668e+07	2.03153e+07	2.03931e+07	2.07665e+07	2.09822e+07	1.94403e+07	2.46917e+07	2.13239e+07	2.43335e+07	2.20154e+07	2.37595e+07	2.20221e+07	4.88876e+07	2.18976e+07	2.1438e+07	2.10727e+07	2.12733e+07	2.24268e+07	1.80752e+07	2.12925e+07	2.17013e+07
trans-Aconitate	2.12759e+06	1.60662e+06	2.22847e+06	1.91661e+06	2.12308e+06	2.01335e+06	2.17243e+06	1.37421e+06	863086	922083	704132	793535	743344	860175	866394	919169	377032	417726	425809	284191	444765	371588	384461	275801	302477	120311	210296	143120	190916	246789	181902	284249
Trehalose	0	0	0	0	0	0	0	0	0	0	0	0	0	0	0	0	0	0	0	0	0	0	0	0	0	0	0	0	0	0	0	0
Trigonelline	1.29573e+06	1.24565e+06	990849	1.40353e+06	1.49514e+06	1.23212e+06	841997	787182	0	0	585726	613215	701450	0	0	654696	2.32468e+06	2.08878e+06	2.47449e+06	1.64038e+06	1.94079e+06	1.45159e+06	1.58594e+06	1.5834e+06	1.39783e+06	1.28933e+06	1.15693e+06	1.24883e+06	1.17497e+06	1.48402e+06	1.16896e+06	1.38599e+06
Trimethylamine	0	0	0	0	0	0	0	0	0	0	0	0	0	0	0	0	0	0	0	0	0	0	0	0	0	0	0	0	0	0	0	0
Tryptamine	0	0	0	0	0	0	0	0	0	0	0	0	0	0	0	0	0	0	0	0	0	0	0	0	0	0	0	0	0	0	0	0
Tryptophan	848456	796638	847808	601869	572140	582449	653532	329215	382602	436033	273183	190611	260708	272688	207757	289399	59719.4	0	0	0	0	0	0	0	0	0	0	0	0	0	0	0
Tryptophanamide	0	0	0	0	0	0	0	0	0	0	0	0	0	0	0	0	0	0	0	0	0	0	0	0	0	0	0	0	0	0	0	0
Tyr-Arg	0	0	0	0	0	0	0	0	0	0	0	0	0	0	0	0	0	0	0	0	0	0	0	0	0	0	0	0	0	0	0	0
Tyramine	0	0	0	0	0	0	0	0	0	0	0	0	0	0	0	0	0	0	0	0	0	0	0	0	0	0	0	0	0	0	0	0
Tyrosine	2.13602e+06	2.34157e+06	2.26052e+06	2.02685e+06	2.38215e+06	2.24267e+06	2.06539e+06	1.1365e+06	835419	977525	805449	950474	863059	903430	1.03494e+06	890160	141265	243248	170186	189384	343673	252943	362146	77192.6	153397	102899	184047	158277	70790.7	115907	108148	380047
UDP-glucose	1.66014e+07	1.39968e+07	1.67341e+07	1.60048e+07	1.6845e+07	1.68367e+07	1.71709e+07	1.50471e+07	5.28015e+06	5.94607e+06	6.61854e+06	6.84162e+06	6.71118e+06	7.46965e+06	6.7616e+06	7.23177e+06	2.70905e+07	2.75006e+07	2.88372e+07	2.422e+07	2.82934e+07	2.51845e+07	2.7689e+07	2.44838e+07	1.45523e+07	1.41671e+07	1.48655e+07	1.52612e+07	1.7764e+07	1.75254e+07	1.64243e+07	1.73862e+07
UDP-N-acetylglucosamine	5.48444e+06	3.99488e+06	5.37609e+06	4.70844e+06	5.03983e+06	5.3574e+06	5.01613e+06	4.11357e+06	1.94008e+06	1.61735e+06	2.02112e+06	2.01994e+06	2.07758e+06	2.26599e+06	1.85053e+06	1.88637e+06	8.54522e+06	8.26174e+06	9.07491e+06	7.45006e+06	8.96638e+06	7.62836e+06	8.72222e+06	7.38717e+06	5.07463e+06	4.91918e+06	5.30646e+06	5.26708e+06	5.80328e+06	5.83669e+06	5.18817e+06	5.78902e+06
Uracil	0	0	0	0	0	0	0	0	0	0	0	0	0	0	0	0	0	0	0	0	0	0	0	0	0	0	0	0	0	0	0	0
Uracil 5-carboxylate	0	0	0	0	0	0	0	0	0	0	0	0	0	0	0	0	0	0	0	0	0	0	0	0	0	0	0	0	0	0	0	0
Urate	0	0	0	0	0	0	0	0	0	0	0	0	0	0	0	0	0	0	0	0	0	0	0	0	0	0	0	0	0	0	0	0
Urea	0	0	0	0	0	0	0	0	0	0	0	0	0	0	0	0	0	0	0	0	0	0	0	0	0	0	0	0	0	0	0	0
Ureidopropionate	0	0	0	0	0	0	0	0	0	0	0	0	0	0	0	0	0	0	0	0	0	0	0	0	0	0	0	0	0	0	0	0
Ureidosuccinate	29795.2	0	0	85529.2	36728.8	0	19878.4	72179.7	0	0	0	20029.7	0	0	0	0	0	119057	76141.5	14365	57712.9	16683	37233.4	0	0	23815.4	21551.1	0	21636.6	0	0	0
Uridine	0	0	54605.7	0	0	80300.9	38116.1	0	0	0	0	43362.3	96731.7	0	109580	98871.1	0	50459.2	0	0	0	72835.8	0	0	39995	0	0	0	0	48178.8	0	38184.8
Uridine diphosphate	1.47232e+06	988119	1.57264e+06	1.4948e+06	1.7934e+06	1.53694e+06	1.57722e+06	1.3916e+06	659289	694684	807730	981851	878985	1.15821e+06	1.00568e+06	984978	891253	906134	1.13397e+06	774899	1.02173e+06	851281	1.05794e+06	872996	1.23532e+06	1.32625e+06	1.49406e+06	1.44028e+06	1.52056e+06	1.55329e+06	1.31505e+06	1.77376e+06
Uridine monophosphate	143404	80660.8	149053	225375	279907	202821	158326	166977	178036	213315	154228	237071	219193	251667	245591	231166	101634	144739	179255	179114	123120	157551	133346	134947	336148	366998	311731	339406	284944	347244	172596	241020
Uridine triphosphate	0	0	0	0	0	0	0	0	0	0	0	0	0	0	0	0	0	0	0	0	0	0	0	0	0	0	0	0	0	0	0	0
Urocanate	390730	4.75239e+06	2.49197e+07	3.97978e+06	0	1.41267e+06	401899	242821	678519	3.67433e+06	0	683753	318725	0	366479	872229	420342	764222	531259	2.18383e+06	1.70164e+06	924391	939730	1.51979e+06	304004	661994	1.36762e+06	757105	1.79685e+06	3.39035e+06	934880	3.91605e+06
Ursodeoxycholate	0	0	0	0	0	0	0	0	0	0	0	0	0	0	0	0	0	0	0	0	0	0	0	0	0	0	0	0	0	0	0	0
Val-Lys	4.30913e+06	3.31016e+06	4.27748e+06	3.71868e+06	4.01136e+06	3.83721e+06	4.38522e+06	2.51277e+06	1.05564e+06	1.31655e+06	1.28504e+06	1.39469e+06	1.46764e+06	1.50888e+06	1.48859e+06	1.39721e+06	1.21514e+06	1.3086e+06	1.93184e+06	1.36957e+06	1.57942e+06	1.00869e+06	1.53016e+06	719643	875365	739329	973176	851976	1.02313e+06	1.03786e+06	1.13776e+06	761433
Val-Phe	0	0	0	0	0	0	0	0	0	0	0	0	0	0	0	0	0	0	0	0	0	0	0	0	0	0	0	0	0	0	0	0
Valine	0	0	0	0	0	0	0	0	0	0	0	0	0	0	0	0	0	0	0	0	0	0	0	0	0	0	0	0	0	0	0	0
Xanthine	0	68541.8	287753	56657.3	16591.4	68014.7	168063	34246.8	0	77051.6	0	34170.9	49277.6	0	72803.7	129299	0	73638	0	0	69302.6	92012	89676.3	50308.1	0	0	0	0	25336.3	76610.2	0	79917
Xanthosine	0	0	0	0	0	0	0	0	0	0	0	0	0	0	0	0	0	0	0	0	0	0	0	0	0	0	0	0	0	0	0	0
Xanthosine monophosphate	0	0	0	0	0	0	0	0	0	0	0	0	0	0	0	0	0	0	0	0	0	0	0	0	0	0	0	0	0	0	0	0
Xanthurenate	0	0	0	0	0	0	0	0	0	0	0	0	0	0	0	0	0	0	0	0	0	0	0	0	0	0	0	0	0	0	0	0

## Sheet: Log2_Normalized_Data
Sample Name	AML_Pipetted_1	AML_Pipetted_2	AML_Pipetted_3	AML_Pipetted_4	AML_Pipetted_5	AML_Pipetted_6	AML_Pipetted_7	AML_Pipetted_8	AML_Sorted_1	AML_Sorted_2	AML_Sorted_3	AML_Sorted_4	AML_Sorted_5	AML_Sorted_6	AML_Sorted_7	AML_Sorted_8	ALL_Pipetted_1	ALL_Pipetted_2	ALL_Pipetted_3	ALL_Pipetted_4	ALL_Pipetted_5	ALL_Pipetted_6	ALL_Pipetted_7	ALL_Pipetted_8	ALL_Sorted_1	ALL_Sorted_2	ALL_Sorted_3	ALL_Sorted_4	ALL_Sorted_5	ALL_Sorted_6	ALL_Sorted_7	ALL_Sorted_8
GroupID	AML_Pipetted	AML_Pipetted	AML_Pipetted	AML_Pipetted	AML_Pipetted	AML_Pipetted	AML_Pipetted	AML_Pipetted	AML_Sorted	AML_Sorted	AML_Sorted	AML_Sorted	AML_Sorted	AML_Sorted	AML_Sorted	AML_Sorted	ALL_Pipetted	ALL_Pipetted	ALL_Pipetted	ALL_Pipetted	ALL_Pipetted	ALL_Pipetted	ALL_Pipetted	ALL_Pipetted	ALL_Sorted	ALL_Sorted	ALL_Sorted	ALL_Sorted	ALL_Sorted	ALL_Sorted	ALL_Sorted	ALL_Sorted
SizeFactor	1.95121	1.75389	1.82985	1.58265	1.6478	1.63544	1.71446	1.0248	1.01515	1.05565	0.961532	1.03102	0.993991	0.917861	0.941332	0.950905	1.07375	0.998885	1.10438	1.05616	1.08318	0.999697	1.0003	0.628673	0.973745	0.851807	0.898298	0.817513	0.937264	0.957956	0.879847	0.950392
Metabolite
1-Aminocyclopropanecarboxylate	0	0	0	0	0	0	0	0	0	0	0	0	0	0	0	0	0	0	0	0	0	0	0	0	0	0	0	0	0	0	0	0
1-Hydroxy-2-naphthoate	0	0	0	0	0	0	0	0	0	0	0	0	0	0	0	0	0	0	0	0	0	0	0	0	0	0	0	0	0	0	0	0
1-Methyladenosine	0	0	0	0	0	0	0	0	0	0	0	0	0	0	0	0	0	0	0	0	0	0	0	0	0	0	0	0	0	0	0	0
1-Methylhistidine	18.7783	18.3859	19.1343	18.4905	19.0464	19.0838	19.1348	18.8965	0	18.4534	18.8338	17.9532	18.5676	19.2031	18.3317	18.2613	18.0855	0	18.4367	18.1204	18.5982	18.2335	18.2886	0	18.2172	0	0	0	18.1739	18.5301	0	18.5383
1-Methylnicotinamide	0	0	0	0	0	0	0	0	0	0	0	0	0	0	0	0	0	0	0	0	0	0	0	0	0	0	0	0	0	0	0	0
1-Phenylethanol	24.3124	24.4665	24.2345	24.6022	24.1296	24.3183	24.2343	24.2546	25.0707	25.2465	25.099	25.4579	25.1012	24.9393	25.3041	25.1898	25.2044	24.8672	24.9903	25.1512	25.0042	25.0966	25.0477	24.9996	25.7633	25.3715	25.6118	25.3446	25.2367	25.3765	25.9366	25.7319
1,3/ 2,3-Bisphosphoglycerate	0	0	0	0	0	0	0	0	0	0	0	0	0	0	0	0	0	0	0	0	0	0	0	0	0	0	0	0	0	0	0	0
2-(3-Carboxy-3-aminopropyl)-histidine	0	0	0	0	0	0	0	0	0	0	0	0	0	0	0	0	0	0	0	0	0	0	0	0	0	0	0	0	0	0	0	0
2-/3-Phosphoglycerate	14.5345	14.5914	15.7005	16.2327	16.07	16.0845	15.7965	15.3486	0	14.311	14.0861	14.8262	15.6056	16.3955	16.1319	16.1796	0	15.0036	14.9683	0	0	13.9332	13.7992	0	0	0	15.4125	0	0	0	0	15.061
2-Aminophenol	0	0	0	0	0	0	0	0	0	0	0	0	0	0	0	0	0	0	0	0	0	0	0	0	0	0	0	0	0	0	0	0
2-Deoxyglucose	0	0	0	0	0	0	0	0	0	0	0	0	0	0	0	0	0	0	0	0	0	0	0	0	0	0	0	0	0	0	0	0
2-Hydroxy-4-(methylthio)butanoate	0	0	0	0	0	0	0	0	0	0	0	0	0	0	0	0	0	0	0	0	0	0	0	0	0	0	0	0	0	0	0	0
2-Hydroxybutyrate	19.3606	18.34	19.0556	18.6926	18.5389	18.9652	19.3397	18.8597	19.5104	19.824	19.8689	18.9263	19.3895	19.1596	0	19.5207	19.0475	0	19.8025	19.3392	19.9839	20.0234	18.6381	19.6475	20.0512	20.1065	19.6484	19.1345	18.9204	19.5108	20.1582	19.2903
2-Hydroxyglutarate	21.6083	21.5976	21.3038	21.6079	21.525	21.6967	21.8344	21.7958	21.499	21.6877	21.8465	21.8029	21.4654	22.3007	21.8224	21.3847	20.8243	21.8962	21.6959	21.6881	21.6993	21.6575	21.4402	22.3053	22.1959	20.976	21.7664	21.8683	21.746	21.4952	21.746	21.7503
2-Hydroxyphenylacetate	0	0	0	0	0	0	0	0	0	0	0	0	0	0	0	0	0	0	0	0	0	0	0	0	0	0	0	0	0	0	0	0
2-Mannosyl-3-phosphoglycerate	0	0	0	0	0	0	0	0	0	0	0	0	0	0	0	0	0	0	0	0	0	0	0	0	0	0	0	0	0	0	0	0
2-Methylmaleate	0	0	0	0	0	0	0	0	0	0	0	0	0	0	0	0	0	0	0	0	0	0	0	0	0	0	0	0	0	0	0	0
2-Quinolinecarboxylate	18.1947	18.4766	18.1459	18.1484	18.5348	18.3592	18.5816	18.1373	16.1152	17.3494	17.7401	17.6293	16.0598	17.4061	17.109	15.8826	14.7945	0	14.8029	0	0	0	0	0	0	0	0	0	0	0	14.7973	0
2,3-Diaminopropionate	0	0	0	0	0	0	0	0	0	0	0	0	0	0	0	0	0	0	0	0	0	0	0	0	0	0	0	0	0	0	0	0
2,3-Dihydroxybenzoate	0	0	0	0	0	0	0	0	0	0	0	0	0	0	0	0	0	0	0	0	0	0	0	0	0	0	0	0	0	0	0	0
2,4-Dihydroxypteridine	0	0	0	0	0	0	0	0	0	0	0	0	0	0	0	0	0	0	0	0	0	0	0	0	0	0	0	0	0	0	0	0
2,5-Dihydroxybenzoate	0	0	0	0	0	0	0	0	0	0	0	0	0	0	0	0	0	0	0	0	0	0	0	0	0	0	0	0	0	0	0	0
2,5-Dimethylpyrazine	0	0	0	0	0	0	0	0	0	0	0	0	0	0	0	0	0	0	0	0	0	0	0	0	0	0	0	0	0	0	0	0
2,6-Dihydroxypyridine	0	0	0	0	0	0	0	0	0	0	0	0	0	0	0	0	0	0	0	0	0	0	0	0	0	0	0	0	0	0	0	0
2',4'-Dihydroxyacetophenone	20.9296	22.2614	21.0442	21.2682	21.1545	21.3852	21.9064	20.8984	22.2029	22.5382	22.8039	21.9975	22.6692	22.6976	22.4981	22.2237	22.545	22.6383	22.0315	22.3006	21.7349	22.1217	22.0081	22.0264	22.6872	22.9089	22.2008	22.2424	21.988	22.1517	22.8479	22.4564
3-(2-Hydroxyphenyl)propanoate	0	0	0	0	0	0	0	0	0	0	0	0	0	0	0	0	0	0	0	0	0	0	0	0	0	0	0	0	0	0	0	0
3-(4-Hydroxyphenyl)pyruvate	0	0	0	0	0	0	0	0	0	0	0	0	0	0	0	0	0	0	0	0	0	0	0	0	0	0	0	0	0	0	0	0
3-Amino-4-hydroxybenzoate	0	0	0	0	0	0	0	0	0	0	0	0	0	0	0	0	0	0	0	0	0	0	0	0	0	0	0	0	0	0	0	0
3-Amino-5-hydroxybenzoate	0	0	0	0	0	0	0	0	0	0	0	0	0	0	0	0	0	0	0	0	0	0	0	0	0	0	0	0	0	0	0	0
3-Dehydroshikimate	0	0	0	0	0	0	0	0	0	0	0	0	0	0	0	0	0	0	0	0	0	0	0	0	0	0	0	0	0	0	0	0
3-Hydroxy-3-methylglutaryl-CoA	0	0	0	0	0	0	0	0	0	0	0	0	0	0	0	0	0	0	0	0	0	0	0	0	0	0	0	0	0	0	0	0
3-Hydroxyanthranilate	0	0	0	0	0	0	0	0	0	0	0	0	0	0	0	0	0	0	0	0	0	0	0	0	0	0	0	0	0	0	0	0
3-Hydroxybenzoate	0	0	0	0	0	0	0	0	0	0	0	0	0	0	0	0	0	0	0	0	0	0	0	0	0	0	0	0	0	0	0	0
3-Hydroxybutyrate	0	0	0	0	0	0	0	0	0	0	0	0	0	0	0	0	0	0	0	0	0	0	0	0	0	0	0	0	0	0	0	0
3-Hydroxycarnitine (14:0)	17.4353	16.5989	15.3551	16.246	16.5225	17.1513	16.2153	14.8494	16.4178	0	0	0	0	15.404	0	0	0	0	0	0	0	0	0	0	15.6654	0	0	0	0	0	0	0
3-Hydroxycarnitine (16:0)	16.9077	17.8539	17.5821	17.591	16.299	16.4831	16.4439	0	0	15.599	0	16.2108	0	0	0	0	0	0	0	0	0	0	0	0	0	0	0	0	16.0756	0	0	0
3-Hydroxycarnitine (18:1)	0	0	0	0	0	0	14.1841	16.161	16.0892	0	0	0	0	0	0	0	0	0	0	0	0	0	14.7798	0	15.6506	0	0	0	0	0	0	0
3-Hydroxycarnitine (4:0)	18.1852	18.1147	18.8332	18.437	17.816	18.1276	18.3745	18.4011	17.0373	17.6175	17.2287	17.6743	17.6192	0	17.7542	0	0	0	0	0	0	0	0	0	0	0	0	0	0	0	0	0
3-Hydroxycarnitine (5:0)	17.0721	16.3226	16.1308	17.0526	17.2433	16.4572	16.284	15.9108	0	0	16.6047	0	17.3139	16.1304	16.5555	0	0	0	0	0	0	0	0	0	0	0	0	0	0	0	0	0
3-Hydroxycarnitine (6:0)	18.5712	18.6829	18.8334	18.7139	19.0542	18.927	18.938	18.7268	18.2223	18.876	18.7866	18.8016	18.7941	18.7261	18.7171	18.7265	0	0	14.6484	0	0	0	0	0	0	0	0	0	0	0	0	0
3-Hydroxycarnitine (8:0)	0	0	0	0	0	0	0	0	0	0	0	0	0	0	0	0	0	0	0	0	0	0	0	0	0	0	0	0	0	0	0	0
3-Hydroxymethylglutarate	22.3621	22.3037	22.4085	22.4602	22.4058	22.4813	22.548	22.7289	22.6173	22.5152	22.432	22.4346	22.4326	22.5407	22.4205	22.3823	22.1989	22.3297	22.3171	22.2977	22.2075	22.1706	22.3096	22.7713	22.3611	22.2525	22.3099	22.4176	22.2804	22.2146	22.1853	22.2541
3-Hydroxyphenylacetate	0	0	0	0	0	0	0	0	0	0	0	0	0	0	0	0	0	0	0	0	0	0	0	0	0	0	0	0	0	0	0	0
3-Hydroxypyruvate	18.2199	17.8981	17.6232	17.2886	17.0636	17.1246	17.8908	17.0381	19.0318	18.5802	18.7394	18.4012	18.6647	18.486	18.5038	17.5522	18.7386	18.2883	18.8094	18.5056	18.3539	18.2675	18.1988	18.1679	19.8637	18.6061	18.9216	18.7043	18.8487	17.9523	18.5831	18.0383
3-Methoxy-4-hydroxymandelate	0	0	0	0	0	0	0	0	0	0	0	0	0	0	0	0	0	0	0	0	0	0	0	0	0	0	0	0	0	0	0	0
3-Methoxytyramine	0	0	0	0	0	0	0	0	0	0	0	0	0	0	0	0	0	0	0	0	0	0	0	0	0	0	0	0	0	0	0	0
3-Methoxytyrosine	0	0	0	0	0	0	0	0	0	0	0	0	0	0	0	0	0	0	0	0	0	0	0	0	0	0	0	0	0	0	0	0
3-Methyl-2-oxindole	0	0	0	0	0	0	0	0	0	0	0	0	0	0	0	0	0	0	0	0	0	0	0	0	0	0	0	0	0	0	0	0
3-Methyl-2-oxovalerate	0	0	0	0	0	0	0	0	0	0	0	0	0	0	0	0	0	0	0	0	0	0	0	0	0	0	0	0	0	0	0	0
3-Methyladenine	0	0	0	0	0	0	0	0	0	0	0	0	0	0	0	0	0	0	0	0	0	0	0	0	0	0	0	0	0	0	0	0
3-Methylcrotonyl-CoA	0	0	0	0	0	0	0	0	0	0	0	0	0	0	0	0	0	0	0	0	0	0	0	0	0	0	0	0	0	0	0	0
3-Methylhistamine	0	0	0	0	0	0	0	0	0	0	0	0	0	0	0	0	0	0	0	0	0	0	0	0	0	0	0	0	0	0	0	0
3-Nitrotyrosine	0	0	0	0	0	0	0	0	0	0	0	0	0	0	0	0	0	0	0	0	0	0	0	0	0	0	0	0	0	0	0	0
3-Sulfinoalanine	0	0	0	0	0	0	0	0	0	0	0	0	0	0	0	0	0	0	0	0	0	0	0	0	0	0	0	0	0	0	0	0
3,4 Dihydroxymandelate	0	0	0	0	0	0	0	0	0	0	0	0	0	0	0	0	0	0	0	0	0	0	0	0	0	0	0	0	0	0	0	0
3,4-Dihydroxybenzoate	0	0	0	0	0	0	0	0	0	0	0	0	0	0	0	0	0	0	0	0	0	0	0	0	0	0	0	0	0	0	0	0
3,4-Dihydroxyphenylacetate	0	0	0	0	0	0	0	0	0	0	0	0	0	0	0	0	0	0	0	0	0	0	0	0	0	0	0	0	0	0	0	0
3,4-Dihydroxyphenylglycol	0	0	0	0	0	0	0	0	0	0	0	0	0	0	0	0	0	0	0	0	0	0	0	0	0	0	0	0	0	0	0	0
3,5-Diiodothyronine	0	0	0	0	0	0	0	0	0	0	0	0	0	0	0	0	0	0	0	0	0	0	0	0	0	0	0	0	0	0	0	0
3,5-Diiodotyrosine	0	0	0	0	0	0	0	0	0	0	0	0	0	0	0	0	0	0	0	0	0	0	0	0	0	0	0	0	0	0	0	0
4-Acetamidobutanoate	0	0	0	0	0	0	0	0	0	0	0	0	0	0	0	0	0	0	0	0	0	0	0	0	0	0	0	0	0	0	0	0
4-Aminobenzoate	0	0	0	0	0	0	0	0	0	0	0	0	0	0	0	0	0	0	0	0	0	0	0	0	0	0	0	0	0	0	0	0
4-Coumarate	0	0	0	0	0	0	0	0	0	0	0	0	0	0	0	0	0	0	0	0	0	0	0	0	0	0	0	0	0	0	0	0
4-Guanidinobutanoate	20.3171	20.1892	20.2112	20.5692	20.3786	20.5881	20.5337	21.1774	20.5972	21.7317	20.7031	20.7782	20.3322	20.5737	20.4783	20.2628	20.6681	21.2399	20.8646	21.2468	21.1767	20.8421	21.3296	21.3079	21.2695	21.2899	21.1169	21.24	21.0633	21.1236	21.1017	21.1415
4-Hydroxybenzoate	0	0	0	0	0	0	0	0	0	0	0	0	0	0	0	0	0	0	0	0	0	0	0	0	0	0	0	0	0	0	0	0
4-Hydroxyphenylglycine	0	0	0	0	0	0	0	0	0	0	0	0	0	0	0	0	0	0	0	0	0	0	0	0	0	0	0	0	0	0	0	0
4-Imidazoleacetate	0	0	0	0	0	0	0	0	0	0	0	0	0	0	0	0	0	0	0	0	0	0	0	0	0	0	0	0	0	0	0	0
4-Methylcatechol	0	0	0	0	0	0	0	0	0	0	0	0	0	0	0	0	0	0	0	0	0	0	0	0	0	0	0	0	0	0	0	0
4-Pyridoxate	17.3726	16.0288	16.1989	16.6117	16.6506	17.0662	16.8459	15.8993	18.1757	17.127	18.4361	18.0875	17.4211	0	16.8399	17.9363	17.112	16.628	17.5741	17.4197	16.0594	0	17.0624	16.0599	0	0	16.7566	0	17.5987	18.8562	18.4692	18.959
4-Quinolinecarboxylate	18.1947	18.4766	18.1459	18.1484	18.5348	18.3592	18.5816	18.1373	16.1152	17.3494	17.7401	17.6293	16.0598	17.4061	17.109	15.8826	14.7945	0	14.8029	0	0	0	0	0	0	0	0	0	0	0	14.7973	0
4alpha-Hydroxyformyl-4beta-methyl-5alpha-cholest-8-en-3beta-ol	0	0	0	0	0	0	0	0	0	0	0	0	0	0	0	0	0	0	0	0	0	0	0	0	0	0	0	0	16.9712	17.8681	0	0
5-Aminolevulinate	24.2212	24.6506	24.5184	24.5642	24.5331	24.5004	24.3238	25.9726	24.1741	24.1444	24.3327	24.2425	24.1432	24.3614	24.2708	24.328	24.0282	24.4323	24.0521	24.3625	24.1368	24.4805	24.3071	26.1947	24.4227	24.4888	24.3639	24.5348	24.3411	24.0993	24.4522	24.3479
5-Aminopentanoate	0	0	0	0	0	0	0	0	0	0	0	0	0	0	0	0	0	0	0	0	0	0	0	0	0	0	0	0	0	0	0	0
5-Hydroxyindoleacetate	0	0	0	0	0	0	0	0	0	0	0	0	0	0	0	0	0	0	0	0	0	0	0	0	0	0	0	0	0	0	0	0
5-Hydroxylysine	0	0	0	0	0	0	0	0	0	0	0	0	0	0	0	0	0	0	0	0	0	0	0	0	0	0	0	0	0	0	0	0
5-Hydroxytryptophan	0	0	0	0	0	0	0	0	0	0	0	0	0	0	0	0	0	0	0	0	0	0	0	0	0	0	0	0	0	0	0	0
5-Methylcytosine	0	0	0	0	0	0	0	0	0	0	0	0	0	0	0	0	0	0	0	0	0	0	0	0	0	0	0	0	0	0	0	0
5,6 Dimethylbenzimidazole	18.3193	18.265	19.0256	18.2979	18.5962	18.8677	19.5052	19.048	0	19.8664	19.969	18.6179	19.6258	21.0413	19.9271	20.0169	20.5268	20.366	19.7637	20.3656	19.3905	20.2899	20.0942	19.8937	18.9505	19.6227	21.2148	19.4631	17.7633	20.4291	19.5988	20.0272
6-Carboxyhexanoate	0	0	0	0	0	0	0	0	0	0	0	0	0	0	0	0	0	0	0	0	0	0	0	0	0	0	0	0	0	0	0	0
6-Hydroxynicotinate	0	0	0	0	0	0	0	0	0	0	0	0	0	0	0	0	0	0	0	0	0	0	0	0	0	0	0	0	0	0	0	0
6-Phosphogluconate	0	0	0	0	0	0	0	0	0	0	0	0	0	0	0	0	0	0	0	0	0	0	0	0	0	0	0	0	0	0	0	0
6-Phosphonogluconolactone	0	0	0	0	0	0	0	0	0	0	0	0	0	0	0	0	0	0	0	0	0	0	0	0	0	0	0	0	0	0	0	0
7-Methylxanthine	0	0	0	0	0	0	0	0	0	0	0	0	0	0	0	0	0	0	0	0	0	0	0	0	0	0	0	0	0	0	0	0
Acetoacetate	0	0	0	0	0	0	0	0	0	0	0	0	0	0	0	0	0	0	0	0	0	0	0	0	0	0	0	0	0	0	0	0
Acetoin	0	0	0	0	0	0	0	0	0	0	0	0	0	0	0	0	0	0	0	0	0	0	0	0	0	0	0	0	0	0	0	0
Acetyl-CoA	0	0	0	0	0	0	0	0	0	0	0	0	0	0	0	0	0	0	0	0	0	0	0	0	0	0	0	0	0	0	0	0
Acetylacrylate	0	0	0	0	0	0	0	0	0	0	0	0	0	0	0	0	0	0	0	0	0	0	0	0	0	0	0	0	0	0	0	0
Acetylaminoadipate	19.625	19.3843	19.576	19.7604	19.7863	19.7852	19.6564	19.9307	18.7153	19.3276	19.3718	18.6096	19.4865	19.2637	19.2053	19.2225	21.0761	21.3035	21.2595	21.0706	21.2546	21.1569	21.2749	21.7565	20.9196	20.7865	20.8018	20.8852	21.0142	20.8218	20.7037	20.8547
Acetylcarnitine	26.0474	26.0155	26.0996	26.203	26.1973	26.1257	26.1553	26.0366	25.5033	25.5515	25.5793	25.528	25.5001	25.6248	25.6224	25.5923	21.4225	21.5725	21.0218	21.0406	20.8761	21.2882	21.0541	21.1852	20.7626	20.9529	20.4562	20.7806	21.018	21.3075	20.3999	20.8315
Acetylcholine	22.7481	22.6918	22.7913	22.9681	22.9781	22.952	22.8387	22.7813	22.3487	22.1799	22.2806	22.3108	22.3346	22.5272	22.3399	22.1785	22.9804	23.0581	22.9507	22.788	22.9236	22.9059	22.9019	22.9457	22.6444	22.7101	22.803	22.7282	22.7282	22.8369	22.7854	22.6202
Adenosine	15.0709	19.1064	19.2093	16.643	17.9837	20.0518	20.1087	18.7657	14.59	0	16.0601	16.8058	20.3582	17.8588	20.5292	20.7598	18.2697	19.8932	16.2232	17.1621	18.9069	20.7793	20.3975	21.1293	17.5686	17.9555	17.2233	17.4622	20.5122	20.5199	18.7675	20.8658
Adenosine cyclic phosphate	0	0	0	0	0	0	0	0	0	0	0	0	0	0	0	0	0	0	0	0	0	0	0	0	0	0	0	0	0	0	0	0
Adenosine diphosphate	22.6515	22.4447	22.8268	22.8302	22.8978	22.9186	22.7869	23.3849	22.6836	22.8474	22.9804	23.1078	23.1587	23.3673	23.2481	23.3486	22.4813	22.4987	22.3996	22.3394	22.6512	22.3863	22.4837	22.9569	22.7739	23.2035	23.2668	23.2177	23.1901	23.0827	22.9051	23.0337
Adenosine diphosphate ribose	0	0	0	0	0	13.5328	0	0	15.4295	13.9444	0	0	0	14.2278	0	0	18.7431	19.1342	19.1448	18.7033	19.2048	19.2091	19.3459	19.6507	17.1641	17.0311	17.9152	16.6414	17.2397	17.5963	17.4417	17.8972
Adenosine monophosphate	20.9428	20.9738	21.0312	21.0332	21.1749	20.6941	20.8092	20.7543	20.5545	21.8015	21.8967	22.1611	21.928	22.1155	21.8199	22.0217	20.4831	20.2961	20.4918	19.9798	20.3454	20.0956	20.3091	20.1827	21.3813	22.0884	21.6988	21.5978	21.6465	21.4414	21.2039	21.2543
Adenosine triphosphate	22.0714	21.9155	22.6145	22.6209	22.805	22.7908	22.4735	23.2579	20.7294	21.1342	21.6926	21.6154	21.625	21.777	22.2052	21.8175	22.43	22.2507	22.2813	22.1352	22.2871	22.2936	22.83	22.8691	21.0484	21.3057	21.8076	21.7402	21.9203	22.0203	22.0901	22.0952
Adenylsuccinate	0	0	0	0	0	0	0	0	0	0	0	0	0	0	0	0	0	0	0	0	0	0	0	0	0	0	0	0	0	0	0	0
Adipate	0	0	0	0	0	0	0	0	0	0	0	0	0	0	0	0	0	0	0	0	0	0	0	0	0	0	0	0	0	0	0	0
ADP-glucose	0	0	0	0	0	0	0	0	0	0	0	0	0	0	0	0	0	0	0	0	0	0	0	0	0	0	0	0	0	0	0	0
ADP-ribose	0	0	14.2597	0	0	14.3207	0	0	0	0	0	0	0	0	15.0065	0	19.6065	20.1565	19.5393	19.5951	19.9485	19.7801	19.8945	20.3328	17.5701	16.8013	17.8566	16.5952	18.0346	17.6542	15.7315	18.3735
ADP-ribose phosphate	0	0	0	0	0	0	0	0	0	0	0	0	0	0	0	0	0	0	0	0	0	0	0	0	0	0	0	0	0	0	0	0
Agmatine sulfate	0	0	0	0	0	0	0	0	0	0	0	0	0	0	0	0	0	0	0	0	0	0	0	0	0	0	0	0	0	0	0	0
AICAR	0	0	0	0	0	0	0	0	0	0	0	0	0	0	0	0	0	0	0	0	0	0	0	0	0	0	0	0	0	0	0	0
Ala-Leu	0	12.9998	13.3094	0	0	0	0	0	0	0	0	0	13.9293	0	13.3829	0	13.8253	13.8712	0	0	0	0	0	0	0	0	0	0	0	0	15.0265	13.3551
Ala-Tyr	0	0	0	0	0	0	0	0	0	0	0	0	0	0	0	0	0	0	0	0	0	0	0	0	0	0	0	0	0	0	0	0
Alanine	21.3088	21.5378	21.7991	21.6854	21.7236	21.246	21.1128	21.4199	21.1535	21.8124	21.8937	21.7131	21.69	22.0073	21.7195	21.4373	22.5222	22.4674	22.9432	22.8241	22.3299	22.3686	22.5934	22.7372	22.559	22.6753	22.4655	23.0973	22.8983	22.8729	22.7559	22.1409
Allantoin	0	15.8425	15.8709	16.0303	15.2968	16.4791	17.0827	15.9827	0	0	0	0	0	0	0	16.0885	0	0	0	0	0	0	0	0	0	0	0	0	0	0	16.8593	0
Allothreonine	0	0	0	0	0	0	0	0	0	0	0	0	0	0	0	0	0	0	0	0	0	0	0	0	0	0	0	0	0	0	0	0
alpha-Ketoglutarate	19.0956	18.6081	18.3679	18.8351	17.9948	18.8274	18.0795	19.006	19.238	19.3526	19.0409	18.6967	19.0781	18.8444	0	18.9748	0	17.6838	17.7281	16.6244	0	18.5411	0	17.764	18.6216	0	0	18.2503	18.4011	18.381	17.3934	19.038
Aminoadipate	0	0	0	0	0	0	0	0	0	0	0	0	0	0	0	0	0	0	0	0	0	0	0	0	0	0	0	0	0	0	0	0
Aminocaprylate	0	0	0	0	0	0	0	0	0	0	0	0	0	0	0	0	0	0	0	0	0	0	0	0	0	0	0	0	0	0	0	0
Aminoisobutanoate	0	0	0	0	0	0	0	0	0	0	0	0	0	0	0	0	0	0	0	0	0	0	0	0	0	0	0	0	0	0	0	0
Aniline-2-sulfonate	0	0	0	0	0	0	0	0	0	0	0	0	0	0	0	0	0	0	0	0	0	0	0	0	0	0	0	0	0	0	0	0
Anserine	0	0	0	0	0	0	0	0	0	0	0	0	0	0	0	0	0	0	0	0	0	0	0	0	0	0	0	0	0	0	0	0
Anthranilate	0	0	0	0	0	0	0	0	0	0	0	0	0	0	0	0	0	0	0	0	0	0	0	0	0	0	0	0	0	0	0	0
Arg-Ala	0	0	0	0	0	0	0	0	0	0	0	0	0	0	0	0	0	0	0	0	0	0	0	0	0	0	0	0	0	0	0	0
Arginine	26.726	26.6654	26.6789	26.8299	26.8542	26.8446	26.8797	26.9781	25.926	25.8403	25.6498	25.6395	25.624	25.8123	25.755	25.9047	27.1768	27.2323	27.1234	27.038	27.1607	27.2103	27.3035	27.4481	26.6517	26.6483	26.6022	26.7783	26.6897	26.8277	26.7187	26.7896
Argininosuccinate	18.4082	18.3568	18.4263	18.8865	18.695	18.9679	18.6175	19.4099	15.219	0	0	0	0	0	0	0	19.1463	19.6485	19.3101	19.1123	19.6878	19.0755	19.6092	20.1263	18.916	18.4463	18.276	19.383	19.2775	19.2671	18.5761	18.9573
Asp-Pro	0	0	0	0	0	0	0	0	0	0	0	0	0	0	0	0	0	0	0	0	0	0	0	0	0	0	0	0	0	0	0	0
Asparagine	23.1128	23.0916	23.1799	23.2766	23.8795	23.3439	23.2636	23.1814	22.4085	22.3409	22.5978	22.8225	22.6482	22.6122	22.5462	22.5713	23.1267	23.2858	23.3188	23.1152	23.1973	23.1982	23.327	23.2581	22.7399	22.8879	23.0582	23.1862	22.9656	23.1775	22.8169	22.9073
Aspartate	24.5227	24.4007	24.6339	24.7033	24.7582	24.7353	24.6873	24.7799	23.8189	23.7986	24.0078	24.0021	23.9561	24.2074	23.9773	24.0987	26.0536	26.251	26.342	26.0686	26.3181	26.1759	26.3211	26.43	25.7958	25.8255	25.8907	26.1039	25.9707	26.1207	25.8825	25.9662
Aspartylglycosamine	0	0	0	0	0	0	0	0	0	0	0	0	0	0	0	0	0	0	0	0	0	0	0	0	0	0	0	0	0	0	0	0
Azelate	19.3287	19.687	18.9351	19.7956	20.1098	19.4698	20.7215	20.9292	22.5006	22.5329	21.2957	20.9489	20.9377	20.4737	20.6223	20.9674	20.3801	20.427	19.9836	19.8809	20.0478	21.1486	20.8497	22.0195	20.5784	20.7146	20.725	20.7866	20.6001	20.8613	20.6299	20.7753
beta-Alanine	0	0	0	0	0	0	0	0	0	0	0	0	0	0	0	0	0	0	0	0	0	0	0	0	0	0	0	0	0	0	0	0
beta-Glycerophosphate	15.5425	15.3252	15.3715	16.0123	15.6305	16.659	16.5439	16.2738	14.4721	15.2869	13.9823	0	15.0573	14.2859	15.0559	14.4999	20.6656	20.8872	21.0404	20.6041	20.8413	20.7142	20.845	21.0896	19.8933	20.2629	20.1783	20.3657	20.2283	20.4526	20.1945	20.3069
Betaine	0	0	0	0	0	0	0	0	0	0	0	0	0	0	0	0	0	0	0	0	0	0	0	0	0	0	0	0	0	0	0	0
Biliverdin	0	0	0	0	0	0	0	0	0	0	0	0	0	0	0	0	0	0	0	0	0	0	0	0	0	0	0	0	0	0	0	0
Biotin	0	0	0	0	0	0	0	0	0	0	0	0	0	0	0	0	0	0	0	0	0	0	0	0	0	0	0	0	0	0	0	0
Biotin amide	0	0	0	0	0	0	0	0	0	0	0	0	0	0	0	0	0	0	0	0	0	0	0	0	0	0	0	0	0	0	0	0
Butanoate	0	0	0	0	0	0	0	0	0	0	0	0	0	0	0	0	0	0	0	0	0	0	0	0	0	0	0	0	0	0	0	0
Butyryl-CoA	0	0	0	0	0	0	0	0	0	0	0	0	0	0	0	0	0	0	0	0	0	0	0	0	0	0	0	0	0	0	0	0
Caffeate	0	0	0	0	0	0	0	0	0	0	0	0	0	0	0	0	0	0	0	0	0	0	0	0	0	0	0	0	0	0	0	0
Carnitinamide	21.0791	20.882	21.0433	21.183	21.3039	21.273	21.1358	21.1837	20.3512	20.2161	20.3163	20.1476	20.2534	20.4534	20.4111	20.2033	17.3087	17.7083	18.2093	17.4443	18.3349	17.5812	18.3834	0	0	16.8843	16.9101	17.0331	17.1206	0	0	0
Carnitine	22.4132	22.3573	22.404	22.6616	22.5143	22.486	22.5411	22.426	22.1789	22.2496	21.9545	22.1695	22.1234	22.2137	22.2276	22.1343	21.0586	21.1175	20.3803	20.579	20.6508	20.7071	20.6502	20.9563	20.8814	20.7931	20.3757	20.7085	20.6646	21.0311	20.2919	20.5645
Carnitine (12:0)	16.4998	15.7048	16.5962	16.2519	0	14.7304	16.5072	0	16.5669	15.6387	0	15.5875	0	16.5475	14.5278	16.9697	15.4604	0	14.6568	0	0	0	0	0	0	0	15.7144	0	0	0	0	0
Carnitine (14:0)	20.6065	20.848	20.6046	20.9178	20.915	20.9141	20.8513	20.1104	20.4252	19.7349	20.1987	20.363	20.2951	20.0864	20.0065	20.0706	0	15.4192	15.3036	0	15.2402	0	0	0	0	0	0	0	16.2169	16.6249	0	15.4493
Carnitine (16:0)	23.4557	23.4851	23.3953	23.5473	23.4964	23.5378	23.3477	23.0589	22.7855	22.585	22.6388	22.5527	22.3585	22.4635	22.5153	22.5092	21.7169	21.8174	21.4708	21.1843	21.376	21.5587	21.4745	21.0867	20.8403	21.0369	20.2468	20.6093	20.5893	20.3606	19.9935	19.533
Carnitine (16:1)	20.632	20.3078	20.4552	20.5939	20.6538	20.5022	20.5414	20.1044	19.2464	17.9856	16.4919	18.041	18.5874	18.2107	17.6352	16.1753	0	0	0	0	0	15.5702	15.9561	15.5832	0	0	16.1104	15.8441	0	0	0	0
Carnitine (17:0)	0	0	0	16.1269	17.02	16.13	0	15.7735	16.1882	17.2545	0	17.049	16.7999	16.9821	0	0	0	0	0	0	0	0	0	15.7191	0	0	0	0	0	0	0	16.2646
Carnitine (18:0)	18.9779	19.5681	19.0467	19.2284	19.2104	19.5015	18.7137	18.5748	19.9145	20.0176	20.2829	19.8148	19.9415	19.9852	20.522	20.2068	0	15.9618	0	0	16.2097	0	0	0	0	0	0	0	0	0	0	16.4794
Carnitine (18:1)	21.0444	20.9663	20.8851	21.1095	21.2675	21.049	20.8777	20.7717	20.8664	20.3933	20.8754	20.354	19.7582	20.4235	20.6315	20.8055	16.0311	15.4522	0	0	16.1782	0	15.9849	0	0	0	0	16.6696	0	0	0	0
Carnitine (20:0)	0	0	0	0	0	0	0	0	0	0	0	0	0	0	0	0	0	0	0	0	0	0	0	0	0	0	0	0	0	0	0	0
Carnitine (3:0)	22.2097	22.319	22.2557	22.3974	22.392	22.3413	22.3256	21.9875	22.2262	22.3984	22.5487	22.5663	22.6065	22.5714	22.7012	22.5351	19.1947	19.7379	18.2855	18.2117	18.6055	19.0512	18.756	18.9077	18.2748	19.1916	18.2071	0	18.9117	18.9973	18.8113	18.5338
Carnitine (4:0)	19.3128	19.4808	19.4683	19.6067	19.5576	19.7136	19.912	19.1466	19.3474	19.5471	19.0012	18.6608	19.6912	18.5999	19.2755	19.7539	18.8342	19.425	18.5415	18.199	18.5043	19.6549	19.5336	18.8549	17.9759	18.5896	17.7568	18.0398	19.2329	18.9391	16.9509	18.3246
Carnitine (5:0)	20.5086	20.4428	20.5012	20.4042	20.6848	20.5486	20.6226	20.3521	19.4171	19.7037	19.8515	19.6271	20.2035	19.418	20.0166	19.5463	0	0	0	0	0	0	0	0	0	0	0	0	0	0	0	0
Carnitine (6:0)	0	0	0	0	0	0	0	0	0	0	0	0	0	0	0	0	0	0	0	0	0	0	0	0	0	0	0	0	0	0	0	0
Carnitine (8:0)	0	0	0	0	0	0	0	0	0	0	0	0	0	0	0	0	0	0	0	0	0	0	0	0	0	0	0	0	0	0	0	0
Carnitine (glutaryl)	0	0	0	0	0	0	0	0	0	0	0	0	0	0	0	0	0	0	0	0	0	0	0	0	0	0	0	0	0	0	0	0
Carnosine	14.1236	0	0	0	14.1436	0	0	0	0	0	0	0	0	0	0	0	0	0	0	0	0	15.2601	0	0	0	14.9793	0	15.1782	0	0	0	0
CDP-ethanolamine	20.2822	20.1305	20.3244	20.4751	20.4956	20.5161	20.3342	20.6967	19.6612	19.6747	19.8847	19.8391	19.7095	19.942	19.9718	19.9547	19.5447	19.7193	19.6322	19.5268	19.5632	19.4823	19.7967	20.1199	18.8412	19.2271	19.1534	19.5095	19.4932	19.4706	19.2356	19.528
Cellobiose	0	0	15.0635	0	0	13.5799	17.4142	14.4418	0	18.0304	0	17.5321	15.6033	0	0	0	0	14.1674	0	16.3178	15.9132	0	19.0207	0	17.2336	0	18.3812	15.0029	16.1368	17.8221	0	15.7373
Cholate	0	0	0	0	0	0	0	0	0	0	0	0	0	0	0	0	0	0	0	0	0	0	0	0	0	0	0	0	0	0	0	0
Choline	26.071	26.0498	26.0453	24.8484	26.154	25.7521	25.8533	24.8831	25.8691	25.8775	24.9764	25.6998	25.4604	25.904	25.462	25.5692	26.5822	26.566	26.5318	26.2974	26.1397	25.7877	25.9864	25.3327	26.569	26.6219	26.4425	26.7441	26.0283	25.8058	26.5527	26.4342
Ciliatine	0	0	0	0	0	0	0	0	0	0	0	0	0	0	0	0	0	0	0	0	0	0	0	0	0	0	0	0	0	0	0	0
cis-4-Hydroxyproline	24.2212	24.6506	24.5184	24.5642	24.5331	24.5004	24.3238	25.9726	24.1741	24.1444	24.3327	24.2425	24.1432	24.3614	24.2708	24.328	24.0282	24.4323	24.0521	24.3625	24.1368	24.4805	24.3071	26.1947	24.4227	24.4888	24.3639	24.5348	24.3411	24.0993	24.4522	24.3479
Citicoline	20.1042	20.0786	20.2695	20.3904	20.4305	20.6312	20.3883	20.3925	19.0043	19.1765	19.8135	19.9017	19.6218	20.121	19.8935	19.9657	20.41	20.3446	20.5068	20.3593	20.5146	20.3543	20.6687	20.6734	19.9234	20.3503	19.9458	20.1194	20.2511	20.2018	20.0536	20.2355
Citramalate	21.8273	21.9718	21.3038	21.6079	21.525	22.2622	21.8344	21.7958	21.499	21.6877	22.0544	22.1429	21.4654	22.4838	22.0522	21.3847	20.8243	21.8962	21.6959	21.6881	21.6993	21.6575	21.4402	22.3053	22.5259	20.976	21.7664	21.8683	21.746	21.4952	21.9901	21.7503
Citrate/Isocitrate	0	0	0	0	0	0	0	0	0	0	0	0	0	0	0	0	0	0	0	0	0	0	0	0	0	0	0	0	0	0	0	0
Citrulline	17.908	18.5375	17.7477	18.3027	17.8173	18.0831	18.3714	18.0092	17.1194	18.9046	16.3989	18.3962	17.2154	17.6946	18.1587	18.2537	18.2907	18.273	18.2185	18.0433	17.4872	18.5345	17.9619	16.6289	17.2477	17.2504	16.6946	18.0789	18.6572	18.696	18.1718	19.0207
CMP-2-aminoethylphosphonate	16.9195	16.5153	17.3831	17.389	17.1653	17.3468	17.1765	17.7853	14.3953	13.8044	16.5785	16.9271	15.8152	16.026	15.1514	15.0608	0	16.256	16.1334	15.1804	13.9262	15.2891	0	15.6472	15.4243	14.4735	14.0988	0	14.1628	13.8308	15.0663	16.047
Cortexolone	0	0	0	0	0	0	0	0	0	0	0	0	0	0	0	0	0	0	0	0	0	0	0	0	0	0	0	0	0	0	0	0
Cortisol	0	0	0	0	0	0	0	0	0	0	0	0	0	0	0	0	0	0	0	0	0	0	0	0	0	0	0	0	0	0	0	0
Cortisol 21-acetate	0	17.2043	16.5123	0	0	0	16.4047	0	0	18.0533	17.1468	0	17.123	0	0	17.4116	17.9205	17.2572	0	0	18.6532	17.4405	18.7104	0	0	18.8084	17.3756	17.0752	0	17.7197	0	18.3648
Creatine	27.0153	27.1873	27.1842	27.3547	27.234	27.1955	27.1172	28.1722	26.8288	26.9371	27.1584	27.0599	27.0296	27.0947	27.0259	27.0718	25.0151	25.2613	25.0759	25.1286	25.0545	25.2181	25.0956	26.3378	24.9052	25.1669	25.0176	25.1162	24.968	24.8967	25.0444	24.907
Creatinine	23.3269	23.4685	23.4206	23.3664	23.4714	23.4537	23.3935	22.941	22.3682	23.2329	22.7488	22.9597	23.1915	22.7738	23.1736	23.2543	23.2248	23.3783	22.9653	22.8338	22.8776	23.2761	23.0228	23.0399	22.6802	22.9866	23.1142	22.7783	22.9425	23.3636	22.6857	22.9583
Cyclic ADP-ribose	21.3769	21.202	21.3387	21.5992	21.6211	21.5629	21.486	21.8195	20.8787	20.7727	21.0241	20.9917	20.9799	21.2779	21.0578	21.0755	20.5782	20.4465	20.6652	20.2549	20.442	20.5206	20.734	21.0105	19.9757	20.4505	20.2206	20.3791	20.398	20.4899	20.3543	20.3949
Cyclic GMP	0	0	0	0	0	0	0	0	0	0	0	0	0	0	0	0	0	0	0	0	0	0	0	0	0	0	0	0	0	0	0	0
Cys-Gly	16.3734	16.1719	15.0926	15.2644	15.6731	15.5532	15.5357	16.4011	16.0078	0	0	16.1686	15.431	0	15.5985	15.1133	18.0787	18.74	18.2469	17.8088	18.7242	17.6545	17.8801	18.352	17.4099	15.4662	17.7833	18.3601	17.838	17.8112	17.2985	17.1506
Cystathionine	15.441	15.9523	0	16.4284	16.5841	15.2623	16.8861	16.2549	0	0	0	0	0	0	0	0	0	0	0	0	0	0	0	0	0	0	0	0	0	0	0	0
Cysteate	0	0	0	0	0	0	0	0	0	0	0	0	0	0	0	0	0	0	0	0	0	0	0	0	0	0	0	0	0	0	0	0
Cystine	0	0	0	0	0	0	0	0	0	0	0	0	0	0	0	0	0	0	0	0	0	0	0	0	0	0	0	0	0	0	0	0
Cytidine	0	0	0	0	0	0	0	0	0	0	0	0	0	0	0	0	0	0	0	0	0	0	0	0	0	0	0	0	0	0	0	0
Cytidine cyclic phosphate	0	0	0	0	0	0	0	0	0	0	0	0	0	0	0	0	0	0	0	0	0	0	0	0	0	0	0	0	0	0	0	0
Cytidine diphosphate	16.1296	14.9759	17.162	16.4432	17.3833	17.0947	17.4863	17.6328	0	15.1209	15.89	16.51	15.1339	16.9959	17.0591	16.8134	16.5364	16.5442	16.652	17.4875	17.1434	17.2933	16.0252	17.8	17.5276	17.5614	17.1042	17.4026	18.0222	17.7467	17.6804	18.0713
Cytidine monophosphate	13.6279	13.9663	14.6271	0	13.2277	13.5549	0	0	0	0	0	14.2966	16.2097	16.2219	14.2766	16.2513	14.0271	14.0081	0	14.6735	15.3113	0	14.7957	0	15.997	16.7793	14.3969	0	15.0208	15.1411	16.2367	16.3245
Cytosine	0	0	0	0	0	0	0	0	0	0	0	0	0	0	0	0	0	0	0	0	0	0	0	0	0	0	0	0	0	0	0	0
Decanoate	23.8852	23.5297	24.1997	24.0517	24.4617	24.4678	23.5059	23.6211	25.7864	25.6209	24.9588	24.6466	25.2827	24.9168	25.074	25.2351	24.5347	24.6605	24.0694	24.9803	24.6423	24.4902	24.6125	24.3682	25.9037	25.0144	24.9902	25.4281	24.827	24.8607	25.3858	25.0529
Deoxyadenosine	0	0	0	0	0	0	0	0	0	0	0	0	0	0	0	0	0	0	0	0	0	0	0	0	0	0	0	0	0	0	0	0
Deoxyadenosine monophosphate	0	0	0	0	0	0	0	0	0	0	0	0	0	0	0	0	0	0	0	0	0	0	0	0	0	0	0	0	0	0	0	0
Deoxyadenosine triphosphate	0	0	0	0	0	0	0	0	0	0	0	0	0	0	0	0	0	0	0	0	0	0	0	0	0	0	0	0	0	0	0	0
Deoxycarnitine	22.7481	22.6918	22.7913	22.9681	22.9781	22.952	22.8426	22.7813	22.3487	22.1799	22.2806	22.3108	22.3346	22.5272	22.3399	22.1785	22.9804	23.0581	22.9507	22.788	22.9236	22.9059	22.9067	22.9457	22.6444	22.7101	22.803	22.7282	22.7282	22.8369	22.7854	22.6202
Deoxycholate	0	0	0	0	0	0	0	0	0	0	0	0	0	0	0	0	0	0	0	0	0	0	0	0	0	0	0	0	0	0	0	0
Deoxycytidine	0	0	0	0	0	0	0	0	0	0	0	0	0	0	0	0	0	0	0	0	0	0	0	0	0	0	0	0	0	0	0	0
Deoxycytidine diphosphate	0	0	0	0	0	0	0	0	0	0	0	0	0	0	0	0	0	0	0	0	0	0	0	0	0	0	0	0	0	0	0	0
Deoxycytidine monophosphate	0	0	0	0	0	0	0	0	0	0	0	0	0	0	0	0	0	0	0	0	0	0	0	0	0	0	0	0	0	0	0	0
Deoxyguanosine	0	0	0	0	0	0	0	0	0	0	0	0	0	0	0	0	0	0	0	0	0	0	0	0	0	0	0	0	0	0	0	0
Deoxyguanosine diphosphate	0	0	0	0	0	0	0	0	0	0	0	0	0	0	0	0	0	0	0	0	0	0	0	0	0	0	0	0	0	0	0	0
Deoxyguanosine monophosphate	0	0	0	0	0	0	0	0	0	0	0	0	0	0	0	0	0	0	0	0	0	0	0	0	0	0	0	0	0	0	0	0
Deoxyinosine	0	0	0	0	0	0	0	0	0	0	0	0	0	0	0	0	0	0	0	0	0	0	0	0	0	0	0	0	0	0	0	0
Deoxypentose monophosphates	0	0	0	0	0	0	0	0	0	0	0	0	0	0	0	0	0	0	0	0	0	0	0	0	0	0	0	0	0	0	0	0
Deoxyribose	16.646	14.7475	17.0205	0	16.1893	15.7359	0	17.4463	17.5275	16.9942	0	16.734	16.9881	0	0	16.6419	0	0	16.9106	17.3557	16.6232	16.6643	16.1868	0	17.3972	15.9997	17.5439	0	0	17.2839	17.6138	18.4249
Deoxyuridine	0	0	0	0	0	0	0	0	0	0	0	0	0	0	0	0	0	0	0	0	0	0	0	0	0	0	0	0	0	0	0	0
Deoxyuridine monophosphate	0	0	0	0	0	0	0	0	0	0	0	0	0	0	0	0	0	0	0	0	0	0	0	0	0	0	0	0	0	0	0	0
Deoxyuridine triphosphate	0	0	0	0	0	0	0	0	0	0	0	0	0	0	0	0	0	0	0	0	0	0	0	0	0	0	0	0	0	0	0	0
Dethiobiotin	17.7255	19.3033	17.7184	18.8963	17.8253	17.9729	19.0632	17.0655	16.9216	19.3195	19.5663	18.1471	19.4549	19.407	20.2607	18.1952	20.0752	20.3472	18.1166	18.3229	19.3671	19.2139	19.7346	18.619	18.1916	20.2375	19.4394	19.9703	19.123	18.157	20.1373	18.7645
Diaminopimelate	0	0	0	0	0	0	0	0	0	0	0	0	0	0	0	0	0	0	0	0	0	0	0	0	0	0	0	0	0	0	0	0
Diethanolamine	0	0	0	0	0	0	0	0	0	0	0	0	0	0	0	0	0	0	0	0	0	0	0	0	0	0	0	0	0	0	0	0
Dihydroorotate	0	0	0	0	0	0	0	0	0	0	0	0	0	0	0	0	0	0	0	0	0	0	0	0	0	0	0	0	0	0	0	0
Dihydrouracil	0	0	0	0	0	0	0	0	0	0	0	0	0	0	0	0	0	0	0	0	0	0	0	0	0	0	0	0	0	0	0	0
Dihydroxyacetone phosphate	0	0	0	0	0	0	0	0	0	0	0	0	0	0	0	0	0	0	0	0	0	0	0	0	0	0	0	0	0	0	0	0
Diphthamide	0	0	0	0	0	0	0	0	0	0	0	0	0	0	0	0	0	0	0	0	0	0	0	0	0	0	0	0	0	0	0	0
Dopamine	0	0	0	0	0	0	0	0	0	0	0	0	0	0	0	0	0	0	0	0	0	0	0	0	0	0	0	0	0	0	0	0
dTDP-glucose	0	0	0	0	0	0	0	0	0	0	0	0	0	0	0	0	0	0	0	0	0	0	0	0	0	0	0	0	0	0	0	0
Epinephrine	0	0	0	0	0	0	0	0	0	0	0	0	0	0	0	0	0	0	0	0	0	0	0	0	0	0	0	0	0	0	0	0
Erythritol	0	0	0	0	0	0	0	0	0	0	0	0	0	0	0	0	0	0	0	0	0	0	0	0	0	0	0	0	0	0	0	0
Erythrose 4-phosphate	0	0	0	0	0	0	0	0	0	0	0	0	0	0	0	0	0	0	0	0	0	0	0	0	0	0	0	0	0	0	0	0
Estradiol 17-alpha	0	0	0	0	0	0	16.6496	0	0	0	0	0	0	0	17.2705	0	0	0	0	0	0	0	0	0	0	16.731	0	0	0	0	17.2251	0
Ethanolamine	0	0	0	0	0	0	0	0	0	0	0	0	0	0	0	0	0	0	0	0	0	0	0	0	0	0	0	0	0	0	0	0
Ethylmalonate	0	0	0	0	0	0	0	0	0	0	0	0	0	0	0	0	0	0	0	0	0	0	0	0	0	0	0	0	0	0	0	0
FA (12:0)	25.411	24.7982	26.048	24.4827	24.658	26.7264	25.1922	25.7628	26.6041	25.8621	25.347	26.5742	25.6488	26.4993	25.9316	27.4117	25.5734	25.2191	27.1359	26.0283	25.8207	26.1177	25.9198	26.2228	27.9105	26.3788	26.5255	25.5702	28.4988	25.9349	26.0549	27.1598
FA (14:0)	26.0093	25.1126	25.4679	25.1939	25.0907	25.7301	25.0909	25.5843	28.0339	26.53	26.0537	26.5733	26.1783	26.097	26.7441	26.914	25.8335	25.9422	26.5505	26.0021	26.3112	26.1902	26.4911	25.7321	26.9547	26.4962	26.5798	26.222	27.1382	26.3177	26.3918	26.7057
FA (16:0)	31.8281	29.3249	28.8194	29.2139	28.9635	28.8752	28.7549	28.4829	31.2705	30.4028	30.1361	29.9821	30.0121	29.755	29.9683	29.5121	30.1266	29.7829	29.5514	29.6705	30.2113	29.453	29.4958	29.354	30.9804	30.5097	30.1209	30.11	29.6998	29.9614	30.9296	30.1108
FA (16:1)	24.4652	23.5059	24.7581	24.4898	24.4407	24.2125	24.1245	24.9447	28.3294	25.693	24.4804	25.7613	25.0211	24.8861	26.1175	25.9172	24.7907	24.7318	26.076	25.0201	25.7702	25.2029	26.5201	24.6995	25.4966	25.7372	25.9594	25.2099	27.0356	25.3331	25.4044	25.7592
FA (18:0)	31.0525	28.3187	27.93	28.2479	27.785	27.7623	27.6919	27.4883	30.2616	29.2395	28.9218	28.9501	28.8497	28.5264	28.7564	28.3622	28.8681	28.6066	28.4338	28.4213	29.3484	28.3364	28.3562	28.021	30.0181	29.3015	29.1999	28.9201	28.6042	28.7571	29.7834	28.9153
FA (18:1)	27.0009	24.5069	24.4959	25.0687	24.9675	24.2486	24.3467	24.5205	28.1132	25.6882	25.1628	25.4445	25.3287	25.2508	25.4658	25.3624	24.9622	25.1369	25.099	25.1645	25.7457	25.1566	25.7865	24.565	25.6776	25.5014	25.2627	25.1113	26.2835	25.4509	26.1987	25.4678
FA (20:0)	24.5121	22.6174	22.1202	22.6827	22.4139	22.1421	22.1675	21.7981	24.917	23.6517	23.2583	23.468	23.0772	22.879	22.9804	22.8448	22.659	22.8578	22.9962	22.8791	23.4822	22.8404	22.9219	22.5941	23.6327	23.2028	22.9043	23.205	22.9852	22.8741	23.6542	23.1452
FA (20:2)	0	18.4109	15.6564	17.4083	18.5661	15.8752	0	16.3748	21.7971	0	16.911	16.8382	17.9056	0	0	17.0601	17.1608	16.6455	18.633	0	0	0	17.5908	0	0	0	16.9214	0	19.2435	0	0	0
FA (8:0)	25.0307	24.6732	25.47	24.8951	25.3868	25.2148	24.4895	25.0395	26.827	26.3675	25.9826	25.8392	26.2154	25.8612	26.0169	26.1316	25.6472	25.5037	25.4449	26.1732	25.7902	25.6933	25.6487	25.3716	26.7381	25.9557	26.4006	26.0397	25.8223	26.1602	26.4633	26.299
Ferulate	0	0	0	0	0	0	0	0	0	0	0	0	0	0	0	0	0	0	0	0	0	0	0	0	0	0	0	0	0	0	0	0
Formylglycine	0	0	0	0	0	0	0	0	0	0	0	0	0	0	0	0	0	0	0	0	0	0	0	0	0	0	0	0	0	0	0	0
Fructose 1,6-bisphosphate	0	0	0	0	0	0	0	0	0	0	0	0	0	0	0	0	0	0	0	0	0	0	0	0	0	0	0	0	0	0	0	0
Fructose 6-phosphate	21.846	21.7482	21.8846	22.0416	22.2224	22.1044	22.2422	22.5128	21.3043	21.5324	21.7954	21.8625	21.8034	21.9628	21.8047	21.9414	14.3457	15.0493	14.1435	15.5506	15.7479	14.6287	14.9426	14.5409	0	0	0	0	14.1183	0	0	14.9193
Fucose 1-phosphate	0	0	0	0	0	0	0	0	0	0	0	0	0	0	0	0	0	0	0	0	0	0	0	0	0	0	0	0	0	0	0	0
Fumarate	21.2743	21.1181	20.4924	21.351	20.6973	20.8733	20.2429	21.2669	0	21.0041	21.0745	20.4204	21.2201	21.0293	21.2784	20.2884	21.2607	21.7385	20.8132	22.1904	21.9317	21.0578	21.2319	22.6594	21.735	21.2843	20.7684	22.0519	21.8233	21.7922	21.9513	20.7638
Galactose 1-phosphate	21.846	21.7482	21.8846	22.0416	22.2224	22.1044	22.2422	22.5128	21.3043	21.5324	21.7954	21.8625	21.8034	21.9628	21.8047	21.9414	14.3457	15.0493	14.1435	15.5506	15.7479	14.6287	14.9426	14.5409	0	0	0	0	14.1183	0	0	14.9193
Galacturonate	0	0	0	0	0	0	0	0	0	0	0	0	0	0	0	0	0	0	0	0	0	0	0	0	0	0	0	0	0	0	0	0
Gamma-aminobutyrate	24.1848	24.3928	24.4645	24.534	24.6381	24.5069	24.5533	24.4375	23.8517	24.6504	24.654	24.6821	24.6872	24.8122	24.8038	24.5834	24.3842	24.5305	24.2435	24.297	24.4089	23.8311	24.572	24.4	24.4674	24.7033	24.0967	24.8379	24.4643	24.4561	24.7294	24.1598
Gamma-linolenate	0	0	0	0	0	0	0	0	0	0	0	0	0	0	0	0	0	0	0	0	0	0	0	0	0	0	0	0	0	0	0	0
Glu-Asp	0	0	0	0	0	0	0	0	0	0	0	0	0	0	0	0	0	0	0	0	0	0	0	0	0	0	0	0	0	0	0	0
Glu-Gln	0	0	0	0	0	0	0	0	0	0	0	0	0	0	0	0	0	0	0	0	0	0	0	0	0	0	0	0	0	0	0	0
Glu-Glu	13.441	0	15.4974	14.4311	13.8985	14.6412	13.4532	0	0	0	0	0	14.3574	0	0	0	0	0	0	0	0	0	0	0	0	0	0	0	0	0	0	0
Glu-Pro	19.1155	18.8773	19.1017	19.1916	19.0976	19.1642	18.8943	18.8663	17.4369	18.432	18.2521	16.7525	17.2811	17.3468	17.7068	17.846	18.0156	18.778	18.0375	18.7698	17.5902	17.5822	18.4548	17.888	17.594	17.6727	0	16.9814	18.1493	0	17.9615	17.9939
Gluconate	0	0	0	0	0	0	0	0	0	0	0	0	0	0	0	0	0	0	0	0	0	0	0	0	0	0	0	0	0	0	0	0
Gluconolactone	0	0	0	0	0	0	0	0	0	0	0	0	0	0	0	0	0	0	0	0	0	0	0	0	0	0	0	0	0	0	0	0
Glucosaminate	0	0	0	0	0	0	0	0	0	0	0	0	0	0	0	0	0	0	0	0	0	0	0	0	0	0	0	0	0	0	0	0
Glucosamine 6-phosphate	0	0	0	0	0	0	0	0	0	0	0	0	0	0	0	0	0	0	0	14.0902	16.2585	14.1606	15.849	0	0	0	0	0	15.1144	0	0	0
Glucosamine 6-sulfate	0	0	0	0	0	0	0	0	0	0	0	0	0	0	0	0	0	0	0	0	0	0	0	0	0	0	0	0	0	0	0	0
Glucose	0	0	0	0	0	0	0	0	0	0	0	0	0	0	0	0	0	0	0	0	0	0	0	0	0	0	0	0	0	0	0	0
Glucose 1-phosphate	0	0	0	0	0	0	0	0	0	0	0	0	0	0	0	0	0	0	0	0	0	0	0	0	0	0	0	0	0	0	0	0
Glucose 6-phosphate	18.106	17.7848	18.3798	18.7836	18.3611	18.2944	18.726	19.1409	17.9067	15.0489	17.4431	16.9794	16.8604	17.4507	17.0841	17.5512	17.6499	17.2404	16.9227	15.8819	16.9192	15.8967	17.2929	17.5882	15.5256	0	15.4367	16.7162	14.899	0	16.3925	16.2044
Glucuronolactone	0	12.8169	0	12.6771	12.5853	0	13.7805	0	0	14.8799	0	0	0	0	0	0	13.8808	0	0	0	0	14.2082	0	0	0	0	0	0	13.5467	0	0	14.3599
Glutamate	27.6086	27.5479	27.7822	27.9152	27.9269	27.8388	27.8269	27.9733	26.9705	27.1439	27.3647	27.4522	27.3257	27.5777	27.4523	27.502	27.9941	28.1817	28.1673	27.9802	28.1109	28.0332	28.1403	28.3265	27.5571	27.6927	27.778	27.9144	27.8317	27.8117	27.7197	27.8262
Glutamine	28.3273	28.316	28.3963	28.5849	28.5394	28.4819	28.4466	28.2681	27.6822	27.9128	27.8875	27.8459	27.8391	27.9928	27.8693	27.9277	28.4858	28.5596	28.5844	28.5224	28.5684	28.4823	28.6515	28.4977	28.038	28.21	28.2717	28.3504	28.1673	28.3097	28.1075	28.0992
Glutarate	0	0	0	0	0	0	0	0	0	0	0	0	0	0	0	0	0	0	0	0	0	0	0	0	0	0	0	0	0	0	0	0
Glutathione	23.5572	23.4806	23.6098	23.7795	23.8077	23.6554	23.6197	23.752	23.5621	23.7008	23.8308	23.7871	23.6449	23.9081	23.6514	23.732	25.1078	25.1902	25.2431	24.9404	25.1631	25.0328	25.2302	25.2893	24.6916	24.9093	24.7939	24.9911	24.9277	24.9008	24.8544	24.813
Glutathione disulfide	20.7837	20.9316	20.9058	21.0826	20.9353	20.7685	20.9413	21.1906	20.9248	20.8469	20.7803	20.7931	20.6789	20.7996	20.5772	20.5157	22.4938	22.8465	22.6695	22.3939	22.5786	22.6331	22.7836	23.2927	22.3149	22.2918	22.3799	22.435	22.2461	22.5204	22.1774	22.3178
Gly-Leu	0	0	0	0	0	0	0	0	0	0	0	0	0	0	0	0	0	0	0	0	0	0	0	0	0	0	0	0	0	0	0	0
Glyceraldehyde	0	0	0	0	0	0	0	0	0	0	0	0	0	0	0	0	0	0	0	0	0	0	0	0	0	0	0	0	0	0	0	0
Glyceraldehyde 3-phosphate	19.7113	19.6335	19.9498	20.1656	20.1392	20.2522	20.27	20.2204	19.0848	18.9317	19.242	19.4501	19.5741	19.6816	19.5953	19.6174	18.1261	18.3447	18.2833	17.2022	17.7976	17.6718	18.1507	18.4679	14.8673	17.354	17.3514	18.0626	17.9451	17.0685	17.6318	18.1074
Glycerate	0	0	0	0	0	0	0	0	0	0	0	0	0	0	0	0	0	0	0	0	0	0	0	0	0	0	0	0	0	0	0	0
Glycerol 3-phosphate	15.5425	15.3252	15.3715	16.0123	15.6305	16.659	16.5439	16.2738	14.4721	15.2869	13.9823	0	15.0573	14.2859	15.0559	14.4999	20.6656	20.8872	21.0404	20.6041	20.8413	20.7142	20.845	21.0896	19.8933	20.2629	20.1783	20.3657	20.2283	20.4526	20.1945	20.3069
Glycerol cyclic phosphate	16.6034	16.9515	15.3865	14.7874	15.646	15.3193	15.0356	16.5841	17.1491	16.6274	15.186	16.064	16.4587	16.0938	16.7929	16.6904	16.9913	16.7952	16.5862	16.6498	16.4826	16.665	16.6216	17.3667	16.5245	17.4615	16.8753	17.3166	17.2764	16.2012	15.3826	15.1997
Glycerophosphocholine	24.4476	24.541	24.7432	24.8074	24.8844	24.8146	24.8933	25.2763	23.3967	23.4849	23.7752	23.7199	23.661	23.9015	23.7869	23.8698	25.6405	25.9352	25.8667	25.8078	25.8769	25.8983	26.1168	26.505	24.9832	25.2814	25.3772	25.4231	25.3124	25.4131	25.446	25.3803
Glycerophosphoethanolamine	21.697	21.5849	21.7216	21.8283	21.8504	21.7601	21.8332	22.0159	21.0487	20.9914	21.1326	21.0829	21.061	21.2149	21.1734	21.081	23.4595	23.5714	23.5591	23.4528	23.5301	23.4987	23.6466	23.8138	23.1378	23.2063	23.2573	23.3564	23.2409	23.3004	23.1835	23.191
Glycerophosphoinositol	20.5074	20.3196	20.485	20.7506	20.616	20.6023	20.7409	20.9568	19.702	19.7183	20.033	19.8077	19.9097	20.1255	19.8801	20.0008	19.6673	19.849	19.6671	19.5287	19.9102	19.9479	19.9237	20.4044	19.1097	19.3945	19.1035	19.4525	19.5078	19.57	19.3796	19.451
Glycine	0	0	0	0	0	0	0	0	0	0	0	0	0	0	0	0	0	0	0	0	0	0	0	0	0	0	0	0	0	0	0	0
Glycochenodeoxycholate	0	0	0	0	0	0	0	0	0	0	0	0	0	0	0	0	0	0	0	0	0	0	0	0	0	0	0	0	0	0	0	0
Glycocholate	0	0	0	0	0	0	0	0	0	0	0	0	0	0	0	0	0	0	0	0	0	0	0	0	0	0	0	0	0	0	0	0
Glycolaldehyde	0	0	0	0	0	0	0	0	0	0	0	0	0	0	0	0	0	0	0	0	0	0	0	0	0	0	0	0	0	0	0	0
Guanidinoacetate	0	0	0	0	0	0	0	0	0	0	0	0	0	0	0	0	0	0	0	0	0	0	0	0	0	0	0	0	0	0	0	0
Guanidinosuccinate	0	0	0	0	0	0	0	0	0	0	0	0	0	0	0	0	0	0	0	0	0	0	0	0	0	0	0	0	0	0	0	0
Guanine	0	0	0	0	0	0	0	0	0	0	0	0	0	0	0	0	0	0	0	0	0	0	0	0	0	0	0	0	0	0	0	0
Guanosine	0	0	0	0	0	0	0	0	0	0	0	0	0	0	0	0	0	0	0	0	0	0	0	0	0	0	0	0	0	0	0	0
Guanosine diphosphate	0	0	0	0	0	0	0	0	0	0	0	0	0	0	0	0	0	0	0	0	0	0	0	0	0	0	0	0	0	0	0	0
Guanosine diphosphate mannose	16.2541	15.7909	16.6115	16.5533	16.4766	16.6846	16.6111	16.8242	0	0	14.4443	0	14.2603	15.2149	15.5381	13.9438	14.0938	16.4916	15.7592	13.8433	15.8924	16.0825	16.0023	17.1393	0	0	13.8464	0	15.8082	13.8355	13.9398	14.2854
Guanosine monophosphate	0	0	13.4508	15.3455	14.2813	15.0588	0	13.8082	0	15.1436	16.7727	16.4581	16.8056	17.2816	15.0532	15.7933	0	14.7524	0	0	0	0	0	0	0	0	0	15.3362	15.8859	15.1959	0	0
Gulonolactone	0	0	0	0	0	0	0	0	0	0	0	0	0	0	0	0	0	0	0	0	0	0	0	0	0	0	0	0	0	0	0	0
Hexarates	0	0	0	0	0	0	0	0	0	0	0	0	0	0	0	0	0	0	0	0	0	0	0	0	0	0	0	0	0	0	0	0
Hexitols	17.66	17.8864	17.6095	17.6935	17.7559	17.6643	17.8378	18.2001	16.3869	19.0369	17.46	18.4982	16.8491	16.8255	16.3386	16.4768	17.2287	18.1185	16.6781	16.6157	17.2466	17.0415	17.6033	17.6154	17.825	16.0366	15.743	16.8052	17.5904	16.0263	14.8867	16.8938
Hexosamines	14.5862	16.3644	15.3967	15.838	16.896	15.3925	0	15.9629	16.7306	15.8929	17.2203	16.9341	17.5178	0	17.947	16.7527	16.9896	16.4932	17.1446	16.5545	16.0205	17.4127	15.3995	17.7723	16.5897	16.6563	17.3561	15.2118	17.399	17.4525	17.4315	16.1612
Hippurate	0	0	0	0	0	0	0	0	0	0	0	0	0	0	0	0	0	0	0	0	0	0	0	0	0	0	0	0	0	0	0	0
Histamine	0	0	0	0	0	0	0	0	0	0	0	0	0	0	0	0	0	0	0	0	0	0	0	0	0	0	0	0	0	0	0	0
Histidine	23.5651	23.5522	23.8531	23.7671	23.8193	23.8027	23.7848	23.9368	22.8616	23.4422	23.3502	23.362	23.3045	23.5007	23.5829	23.4548	23.1537	23.4934	23.2091	23.389	23.319	23.3972	23.4867	23.6008	22.9628	23.2777	23.3722	23.4645	23.2969	23.3222	23.2211	23.5265
Histidinol	0	0	0	0	0	0	0	0	0	0	0	0	0	0	0	0	0	0	0	0	0	0	0	0	0	0	0	0	0	0	0	0
Homoarginine	0	0	0	0	0	0	0	0	0	0	0	0	0	0	0	0	0	0	0	0	0	0	0	0	0	0	0	0	0	0	0	0
Homocysteine	0	0	0	0	0	0	0	0	0	0	0	0	0	0	0	0	0	0	0	0	0	0	0	0	0	0	0	0	0	0	0	0
Homocysteine thiolactone	0	16.1379	16.0605	0	0	0	16.0653	0	17.9888	0	0	0	0	0	0	0	0	17.1577	0	0	0	0	0	0	17.8467	0	0	0	0	0	16.9823	0
Homocystine	0	0	0	0	0	0	0	0	0	0	0	0	0	0	0	0	0	0	0	0	0	0	0	0	0	0	0	0	0	0	0	0
Homogentisate	0	0	0	0	0	0	0	0	0	0	0	0	0	0	0	0	0	0	0	0	0	0	0	0	0	0	0	0	0	0	0	0
Homoserine	0	0	0	0	0	0	0	0	0	0	0	0	0	0	0	0	0	0	0	0	0	0	0	0	0	0	0	0	0	0	0	0
Homovanillate	0	0	0	0	0	0	0	0	0	0	0	0	0	0	0	0	0	0	0	0	0	0	0	0	0	0	0	0	0	0	0	0
Hydroquinone	0	0	0	0	0	0	0	0	0	0	0	0	0	0	0	0	0	0	0	0	0	0	0	0	0	0	0	0	0	0	0	0
Hydroxy-FA (10:0)	20.6143	20.6651	20.943	20.6794	20.737	20.889	21.1139	20.3036	22.0355	21.6309	21.3849	21.6607	21.1864	21.4585	21.3103	21.6536	21.2412	21.0572	21.4749	21.6573	21.2775	21.3302	21.3567	20.9719	22.2597	21.6016	21.9006	21.5394	21.9198	21.7739	21.803	22.1492
Hydroxy-FA (12:0)	21.2161	20.7039	21.5108	21.4834	20.9407	21.2533	20.7361	20.5403	22.0809	21.1964	20.7579	22.0137	20.3746	21.6368	21.4001	22.2177	21.3185	20.9332	22.0565	21.4957	21.5254	21.7841	21.8465	21.06	22.3078	21.5018	21.5847	22.4043	22.2823	21.8359	20.9129	21.9651
Hydroxy-FA (18:1)	23.4563	22.7381	22.4833	23.016	22.3974	22.0689	22.5112	22.2205	24.1963	23.4114	23.3132	23.4309	23.3174	23.2737	23.0445	23.0819	23.1168	23.2376	23.2345	22.9704	22.9285	22.8309	23.0438	23.1565	23.9825	23.435	23.4886	23.365	23.4714	23.493	23.7242	23.7483
Hydroxy-FA (6:0)	0	0	0	0	0	0	0	0	0	0	0	0	0	0	0	0	0	0	0	0	0	0	0	0	0	0	0	0	0	0	0	0
Hydroxy-FA (7:0)	22.2381	22.0916	22.4696	22.5214	22.3928	22.0938	22.5406	22.1234	23.6193	23.0486	22.743	22.8948	22.9237	22.7901	22.886	23.3356	23.0027	22.8792	23.0606	23.2028	23.0228	23.2976	23.0442	22.6545	23.2475	23.2797	23.4238	23.1183	23.2063	23.5999	23.4276	23.7468
Hydroxy-FA (8:0)	21.4624	21.1122	21.282	20.9742	21.1021	21.1356	21.3595	20.9576	22.2194	21.9156	21.8286	22.0842	21.9307	21.8521	21.5069	22.0343	21.9504	21.7699	21.8898	21.9311	21.763	21.7536	21.6908	21.776	22.3806	22.1409	22.2883	22.1486	22.0583	22.2221	22.0835	22.3477
Hydroxycitrate	0	0	0	0	0	0	0	0	0	0	0	0	0	0	0	0	0	0	0	0	0	0	0	0	0	0	0	0	0	0	0	0
Hydroxyphenyllactate	0	0	0	0	0	0	0	0	0	0	0	0	0	0	0	0	0	0	0	0	0	0	0	0	0	0	0	0	0	0	0	0
Hypotaurine	20.3755	20.2672	20.5484	20.6656	20.679	20.5078	20.3087	20.9054	19.8372	19.862	20.0284	20.1035	19.8926	19.9668	20.1146	19.967	21.782	21.9371	21.9257	21.8598	21.9349	21.8813	21.9932	22.1211	21.547	21.6862	21.8272	21.8767	21.6652	21.8122	21.7893	21.7021
Hypoxanthine	20.4572	20.8366	20.9682	21.2184	20.9236	20.8096	21.0627	20.6486	18.6942	19.1844	20.083	20.1573	20.4635	20.081	20.1299	20.672	16.9488	16.6047	17.096	0	16.0319	17.9844	18.2755	18.0203	17.1772	19.3892	20.0765	19.7574	19.7518	19.8162	18.1881	20.0358
Indole	24.4765	24.0412	24.2441	26.1571	24.6919	24.3114	24.3346	24.2664	25.3523	25.1756	24.8283	25.4684	24.8968	25.1314	25.224	25.9293	25.0073	24.9098	25.3317	25.0892	25.1108	25.1018	25.5263	24.5477	26.3889	25.2297	25.0312	26.713	25.8182	26.1451	25.4406	25.585
Indole-3-acetamide	0	0	0	0	0	0	0	0	0	0	0	0	0	0	0	0	0	0	0	0	0	0	0	0	0	0	0	0	0	0	0	0
Indole-3-acetate	0	0	0	0	0	0	0	0	0	0	0	0	0	0	0	0	0	0	0	0	0	0	0	0	0	0	0	0	0	0	0	0
Indole-3-acrylate	18.7929	18.9876	19.0015	18.8553	19.2361	18.6909	19.0042	18.5598	17.8368	18.4822	18.1267	18.1325	18.2388	18.2237	18.5708	18.3654	0	15.13	0	15.2308	15.0485	0	16.6251	0	0	0	0	0	0	0	0	0
Indole-3-ethanol	0	0	0	0	0	0	0	0	0	0	0	0	0	0	0	0	0	0	0	0	0	0	0	0	0	0	0	0	0	0	0	0
Indole-3-methyl acetate	0	0	0	0	0	0	0	0	0	0	0	0	0	0	0	0	0	0	0	0	0	0	0	0	0	0	0	0	0	0	0	0
Indole-3-pyruvate	0	0	0	0	0	0	0	0	0	0	0	0	0	0	0	0	0	0	0	0	0	0	0	0	0	0	0	0	0	0	0	0
Indoleacetaldehyde	0	0	0	0	0	0	0	0	0	0	0	0	0	0	0	0	0	0	0	0	0	0	0	0	0	0	0	0	0	0	0	0
Indoxyl sulfate	0	0	0	0	0	0	0	0	0	0	0	0	0	0	0	0	0	0	0	0	0	0	0	0	0	0	0	0	0	0	0	0
Inosine	0	0	0	0	0	0	0	0	0	0	0	0	0	0	0	0	0	0	0	0	0	0	0	0	0	0	0	0	0	0	0	0
Inosine diphosphate	0	0	0	0	0	0	0	0	0	0	0	0	0	0	0	0	0	0	0	0	0	0	0	0	0	0	0	0	0	0	0	0
Inosine monophosphate	17.7118	18.019	17.9782	16.9583	17.0808	17.9489	17.1502	19.0408	17.3606	18.1967	19.4578	19.2918	19.2619	19.9363	19.592	18.7165	0	0	0	0	14.8154	0	0	15.3098	18.2541	18.9998	17.3886	18.082	16.264	16.888	17.4449	16.6076
Isoleucine	22.8242	22.8317	22.905	22.9549	22.962	22.8269	22.7978	22.6038	21.8908	21.7089	21.64	21.6398	22.1605	21.5542	21.5894	21.5788	22.2438	22.3507	22.1882	22.0718	22.2553	22.2461	22.2968	21.8882	21.8628	21.6314	21.6237	21.8522	21.7786	21.7217	21.8536	21.6923
Isopentenyl pyrophosphate	0	0	0	0	0	0	0	0	0	0	0	0	0	0	0	0	0	0	0	0	0	0	0	0	0	0	0	0	0	0	0	0
Itaconate	21.8463	21.4859	21.2897	21.3447	21.5226	21.1322	21.6282	0	22.4537	21.8475	21.6372	21.5701	21.4645	21.7738	21.5264	22.3341	20.6392	20.5704	21.8294	22.3157	22.4188	22.6992	21.7931	0	21.3986	20.5537	22.5209	21.3292	22.1097	23.3792	21.8398	22.4294
Ketoleucine	0	0	0	0	0	0	0	0	0	0	0	0	0	0	0	0	0	0	0	0	0	0	0	0	0	0	0	0	0	0	0	0
Kynurenate	0	0	0	0	0	0	0	0	0	0	0	0	0	0	0	0	0	0	0	0	0	0	0	0	0	0	0	0	0	0	0	0
Kynurenine	0	0	0	0	0	0	0	0	0	0	0	0	0	0	0	0	0	0	0	0	0	0	0	0	0	0	0	0	0	0	0	0
L-DOPA	0	0	0	0	0	0	0	0	0	0	0	0	0	0	0	0	0	0	0	0	0	0	0	0	0	0	0	0	0	0	0	0
Lactate	28.6201	27.5445	28.9067	27.6322	28.525	28.4287	27.6572	28.9513	29.1358	29.3436	28.7774	29.3669	29.268	28.9918	28.3126	29.6981	28.514	27.8734	28.8662	29.4877	29.4517	29.4489	28.751	29.2087	29.7833	29.4992	29.6333	28.6558	29.1346	29.6033	29.3614	29.9558
Lactose	0	0	0	0	0	0	0	0	0	0	0	0	0	0	0	0	0	0	0	0	0	0	0	0	0	0	0	0	0	0	0	0
Leu-Leu	20.0767	21.9648	20.0413	21.0329	20.7815	20.3828	21.4394	0	20.9549	21.1507	22.1551	21.3461	22.0725	21.4775	21.8146	20.8763	22.1581	22.3649	20.7032	21.7777	21.1676	21.4635	21.5378	0	21.1591	22.333	21.5345	21.7674	21.2794	21.1928	22.0007	21.6012
Leu-Pro	18.5668	18.5951	18.1578	18.5074	18.7914	18.7657	18.6663	18.357	18.0693	17.56	18.443	18.0609	18.0426	18.4155	17.7429	16.8947	18.7821	18.0239	17.8194	17.1566	17.8742	17.8489	18.1922	0	17.6423	17.7706	17.3776	18.161	18.1299	17.253	17.3646	16.9204
Leu-Val	0	0	0	0	0	0	0	0	0	0	0	0	0	0	0	0	0	0	0	0	0	0	0	0	0	0	0	0	0	0	0	0
Leucine	22.8924	22.8511	22.8171	22.9609	23.0727	22.9884	22.8943	22.5965	22.0493	22.0129	21.7924	21.9345	22.0801	21.7397	22.8047	21.8379	22.3539	22.3627	22.3101	22.0376	22.3554	22.3368	22.2802	22.1138	21.8347	22.0059	22.784	21.9005	21.7655	22.0931	21.9087	21.8543
Liothyronine	0	0	0	0	0	0	0	0	0	0	0	0	0	0	0	0	0	0	0	0	0	0	0	0	0	0	0	0	0	0	0	0
Lipoamide	0	0	0	0	0	0	0	0	0	0	0	0	0	0	0	0	0	0	0	0	0	0	0	0	0	0	0	0	0	0	0	0
Lithocholate	0	0	0	0	0	0	0	0	0	0	0	0	0	0	0	0	0	0	0	0	0	0	0	0	0	0	0	0	0	0	0	0
Lithocholyltaurine	0	0	0	0	0	0	0	0	0	0	0	0	0	0	0	0	0	0	0	0	0	0	0	0	0	0	0	0	0	0	0	0
Lumichrome	23.3324	20.5815	20.9881	21.2628	20.2208	21.0852	20.8403	20.5142	21.2432	23.2156	20.7498	22.1206	20.5679	20.7071	20.8971	19.943	20.745	21.2428	20.5864	20.8121	22.0933	21.6452	20.992	21.0524	22.3228	22.3099	22.2288	21.5661	20.6043	22.1672	23.1124	22.0208
Lysine	18.8874	19.1206	18.8044	18.9359	19.1506	18.8826	18.5631	17.7855	18.617	18.4553	0	0	0	0	0	18.1243	18.2346	19.1805	18.4662	18.8497	18.3806	17.805	18.2266	0	0	0	18.0194	18.1902	0	17.736	0	18.6171
Lyso-PC (16:0)	23.9919	23.8395	23.7531	23.6301	23.7021	23.8021	23.6433	23.3854	23.6848	23.4475	23.1031	23.0131	23.2396	23.0419	23.1595	23.1506	23.4206	23.4695	23.0887	22.9357	22.7787	23.0108	23.0561	22.7025	22.8667	22.9279	22.5104	22.303	22.3945	22.2593	22.0598	22.1343
Lyso-PC (17:0)	20.4168	20.3347	19.9959	20.1121	20.1828	20.3108	19.9132	19.6685	19.9004	19.4816	19.5734	19.5717	19.2677	19.4563	18.5954	19.7712	18.8303	18.7514	18.5731	18.6403	18.3218	17.4987	17.8645	16.9497	17.4183	16.9848	16.959	17.8453	15.9285	0	15.6646	16.5558
Lyso-PC (18:0)	24.8158	24.8534	24.6964	24.7419	24.75	24.7499	24.61	24.318	24.6734	24.4007	24.374	24.2495	24.356	24.4191	24.3398	24.3913	24.0571	23.8444	23.8328	23.7126	23.53	23.7467	23.6871	23.3988	23.2992	23.1963	22.991	22.9573	22.9757	22.8172	22.8919	22.8161
Lyso-PC (18:1)	22.7008	22.3917	22.2972	22.2485	22.2554	22.365	22.2189	21.8647	22.2589	21.9659	21.6871	21.6449	21.7425	21.688	21.7074	21.7178	22.5597	22.156	22.2828	22.1997	21.8757	21.9805	22.0475	21.5723	21.5434	21.3088	21.1369	20.9393	21.0507	20.8398	20.9614	20.7228
Lyso-PC (18:2)	16.7646	17.6128	16.5632	15.3741	15.3002	16.1625	17.3058	0	15.7852	15.4489	0	0	0	0	16.7016	0	0	0	15.979	0	0	0	0	0	0	0	0	15.6521	0	0	0	0
Lyso-PC (22:4)	0	0	0	0	0	0	0	0	0	0	0	0	0	0	0	0	0	0	0	0	0	0	0	0	0	0	0	0	0	0	0	0
Lyso-PE (16:0)	16.9284	16.6781	16.8361	15.838	0	16.524	16.9849	0	17.3436	16.4829	0	0	0	0	17.0452	0	18.2124	16.9606	17.2844	16.5339	17.4313	0	0	16.7386	15.3746	17.4436	16.112	17.4143	16.9966	17.1935	0	15.7398
Lyso-PE (18:0)	20.7625	20.7179	20.642	20.6252	20.595	20.7192	20.5656	20.5093	20.8959	20.5439	20.7907	20.8344	20.5642	20.6993	20.6543	20.6684	20.6039	20.7044	20.5829	20.4841	20.5068	20.7252	20.5541	20.2233	20.466	20.2105	20.3786	20.0739	20.2392	20.1398	20.1039	20.2097
Lyso-PE (18:1)	18.4548	18.644	18.5677	18.6134	18.749	18.8651	19.0123	17.9889	18.7902	19.2472	18.7306	18.6955	18.6335	18.5515	18.6401	18.4058	19.0279	19.0105	19.3469	19.3755	18.1948	18.8607	18.5575	16.9695	18.5934	18.7405	18.4088	17.9542	18.6047	17.6713	17.4515	17.9446
Lyso-PE (20:4)	18.4396	18.0657	18.0909	18.0899	18.0831	18.2977	17.451	17.6884	18.9924	18.212	17.0184	18.3322	17.9872	18.0686	18.4867	18.4217	15.5773	16.9016	17.4512	17.8687	16.4107	15.6063	0	17.0355	17.5475	16.9091	15.8565	17.7788	17.7122	16.5253	18.3198	15.8207
Lyso-PG (18:1)	0	0	0	0	0	0	0	0	0	0	0	0	0	0	0	0	0	0	0	0	0	0	0	0	0	0	0	0	0	0	0	0
Malate	23.9831	23.9162	23.9185	24.2314	24.0563	24.0543	24.0824	24.4289	23.3858	23.5975	23.8921	23.7755	23.8047	23.7215	23.6987	23.6439	25.236	25.3797	25.2771	25.1635	25.3091	25.2544	25.3836	25.923	25.0963	24.62	24.4611	24.8341	24.6369	24.3447	24.5719	24.356
Maleate	0	0	0	0	0	0	0	0	0	0	0	0	0	0	0	0	0	0	0	0	0	0	0	0	0	0	0	0	0	0	0	0
Malonate	21.0204	20.8083	20.6995	20.4269	20.8953	21.0122	21.4579	21.2243	21.3062	22.032	21.6125	21.0106	21.3066	21.2907	20.8408	21.3717	21.5311	21.4652	20.9186	21.4622	21.5237	21.4793	21.5738	21.9336	22.2873	21.1456	21.0351	21.108	21.3876	21.474	21.6136	21.6087
Maltose	0	0	15.0635	0	0	13.5799	17.4142	14.4418	0	18.0304	0	17.5321	15.6033	0	0	0	0	14.1674	0	16.3178	15.9132	0	19.0207	0	17.2336	0	18.3812	15.0029	16.1368	17.8221	0	15.7373
Mandelate	0	0	0	0	0	0	0	0	0	0	0	0	0	0	0	0	0	0	0	0	0	0	0	0	0	0	0	0	0	0	0	0
Mannose 6-phosphate	0	0	0	0	0	0	0	0	0	0	0	0	0	0	0	0	0	0	0	0	0	0	0	0	0	0	0	0	0	0	0	0
Melatonin	0	0	0	0	0	0	0	0	0	0	0	0	0	0	0	0	0	0	0	0	0	0	0	0	0	0	0	0	0	0	0	0
Melibiose	0	0	0	0	0	0	0	0	0	0	0	0	0	0	0	0	0	0	0	0	0	0	0	0	0	0	0	0	0	0	0	0
Mesoxalate	0	0	0	0	0	0	0	0	0	0	0	0	0	0	0	0	0	0	0	0	0	0	0	0	0	0	0	0	0	0	0	0
Met-Leu	0	0	0	0	0	0	0	0	0	0	0	0	0	0	0	0	0	0	0	0	0	0	0	0	0	0	0	0	0	0	0	0
Methacholine	19.8012	19.7998	19.811	19.7755	19.9621	19.6982	19.6148	19.7944	19.3141	19.2956	19.4625	19.4315	19.2763	19.4426	19.4122	19.1566	0	15.3394	0	0	0	0	0	0	0	0	0	0	0	0	0	0
Methionine	20.2933	20.3551	20.2772	20.3652	20.5598	20.4876	20.3697	20.2134	19.7955	19.7907	19.7869	19.4795	19.2938	19.7279	19.2007	19.7618	19.9086	19.9429	19.8928	19.705	19.7159	19.6681	19.7378	19.6193	18.6187	19.2328	18.9579	19.2967	18.9515	19.6067	19.1311	19.0361
Methionine sulfoximine	0	0	0	0	0	0	0	0	0	0	0	0	0	0	0	0	0	0	0	0	0	0	0	0	0	0	0	0	0	0	0	0
Methyglutarate	0	0	0	0	0	0	0	0	0	0	0	0	0	0	0	0	0	0	0	0	0	0	0	0	0	0	0	0	0	0	0	0
Methyl 4-aminobutyrate	0	0	0	0	0	0	0	0	0	0	0	0	0	0	0	0	0	0	0	0	0	0	0	0	0	0	0	0	0	0	0	0
Methyl vanillate	18.5068	19.7483	18.3119	15.3678	17.6853	18.393	19.6344	18.4681	19.6517	19.1909	20.205	18.742	20.1903	19.8337	19.7375	17.41	20.3418	20.6894	18.1408	18.8429	18.3188	19.4657	17.9039	18.9705	19.5327	20.404	19.8333	16.2323	18.3178	18.5718	20.5521	18.9473
Methylguanine	0	0	0	0	0	0	0	0	0	0	0	0	0	0	0	0	0	0	0	0	0	0	0	0	0	0	0	0	0	0	0	0
Methylmalonate	0	0	0	0	0	0	0	0	0	0	0	0	0	0	0	0	0	0	0	0	0	0	0	0	0	0	0	0	0	0	0	0
Mevalolactone	24.2586	24.1405	24.4447	24.4156	24.5619	24.4817	24.0992	24.2104	24.6638	24.0396	23.9727	24.0759	24.2202	23.9004	23.7965	24.066	23.5687	23.404	23.8067	24.2221	23.8339	24.0074	23.7359	23.7656	24.4886	24.0004	24.3444	24.016	24.0747	23.9323	24.0028	24.1675
Mevalonate	0	0	0	0	0	0	0	0	0	0	0	0	0	0	0	0	0	0	0	0	0	0	0	0	0	0	0	0	0	0	0	0
Monoethylmalonate	0	0	0	0	0	0	0	0	0	0	0	0	0	0	0	0	0	0	0	0	0	0	0	0	0	0	0	0	0	0	0	0
Monomethylglutarate	0	0	0	0	0	0	0	0	0	0	0	0	0	0	0	0	0	0	0	0	0	0	0	0	0	0	0	0	0	0	0	0
Myoinositol	25.9133	25.8601	25.942	26.1171	25.9339	26.0926	26.0291	26.2665	25.9514	25.7448	25.8438	25.7677	25.8013	26.017	25.7711	25.6468	24.0989	24.1095	24.0393	24.0564	24.1082	24.0189	23.9687	24.5249	24.0006	24.1518	23.8986	24.2052	23.9881	23.9159	23.79	23.7918
N-Acetylalanine	0	0	0	0	0	0	0	0	0	0	0	0	0	0	0	0	0	0	0	0	0	0	0	0	0	0	0	0	0	0	0	0
N-Acetylasparagine	0	0	0	0	0	0	0	0	0	0	0	0	0	0	0	0	0	0	0	0	0	0	0	0	0	0	0	0	0	0	0	0
N-Acetylaspartate	25.6913	25.5207	25.7388	25.8858	25.9414	25.8427	25.8152	26.0456	24.9414	24.9086	25.0767	25.1515	25.102	25.2834	25.076	25.1923	21.1574	21.4568	21.6838	21.3191	21.0993	21.1069	21.3361	21.734	21.379	21.4696	21.4802	21.4913	21.1536	21.1759	21.3577	21.3071
N-Acetylcysteine	0	0	0	0	0	0	0	0	0	0	0	0	0	0	0	0	0	0	0	0	0	0	0	0	0	0	0	0	0	0	0	0
N-Acetylglutamate	0	0	0	0	0	0	0	0	0	0	0	0	0	0	0	0	0	0	0	0	0	0	0	0	0	0	0	0	0	0	0	0
N-Acetylglycine	0	0	0	0	0	0	0	0	0	0	0	0	0	0	0	0	0	0	0	0	0	0	0	0	0	0	0	0	0	0	0	0
N-Acetylhexosamine	0	0	0	0	0	0	0	0	0	0	0	0	0	0	0	0	0	0	0	0	0	0	0	0	0	0	0	0	0	0	0	0
N-Acetylhexosamine phosphate	19.0141	18.5036	19.0423	19.1664	19.2264	19.1311	19.2026	19.4136	18.3366	18.1165	18.4499	18.1171	18.5036	18.7577	18.6852	18.3734	17.9659	18.2584	18.1339	17.7879	18.5445	18.4186	18.8137	19.1675	16.6565	17.886	17.9196	17.0869	18.027	18.3082	17.8877	17.8075
N-Acetylhexosamine sulfate	0	0	0	0	0	0	0	0	0	0	0	0	0	0	0	0	0	0	0	0	0	0	0	0	0	0	0	0	0	0	0	0
N-Acetylleucine	0	0	0	0	0	0	0	0	0	0	0	0	0	0	0	0	0	0	0	0	0	0	0	0	0	0	0	0	0	0	0	0
N-Acetylmethionine	0	0	0	0	0	0	0	0	0	0	0	0	0	0	0	0	17.2472	17.9843	17.9589	17.9075	17.8504	17.8347	18.1317	18.071	16.1735	16.4851	17.9084	16.8524	17.7003	17.8016	17.0638	17.4891
N-Acetylneuraminate	0	0	0	0	0	0	0	0	0	0	0	0	0	0	0	0	0	0	0	0	0	0	0	0	0	0	0	0	0	0	0	0
N-Acetylornithine	0	0	0	0	0	0	0	0	0	0	0	0	0	0	0	0	0	0	0	0	0	0	0	0	0	0	0	0	0	0	0	0
N-Acetylphenylalanine	0	0	0	0	0	0	0	0	0	0	0	0	0	0	0	0	0	0	0	0	0	0	0	0	0	0	0	0	0	0	0	0
N-Acetylproline	0	0	0	0	0	0	0	0	0	0	0	0	0	0	0	0	0	0	0	0	0	0	0	0	0	0	0	0	0	0	0	0
N-Acetylputrescine	0	0	0	0	0	0	0	0	0	0	0	0	0	0	0	0	0	0	0	0	0	0	0	0	0	0	0	0	0	0	0	0
N-Acetylserine	0	0	0	0	0	0	0	0	0	0	0	0	0	0	0	0	0	0	0	0	0	0	0	0	0	0	0	0	0	0	0	0
N-Acetylserotonin	0	0	0	0	0	0	0	0	0	0	0	0	0	0	0	0	0	0	0	0	0	0	0	0	0	0	0	0	0	0	0	0
N-Acetyltryptophan	0	0	0	0	0	0	0	0	0	0	0	0	0	0	0	0	0	0	0	0	0	0	0	0	0	0	0	0	0	0	0	0
N-alpha-Acetyllysine	0	0	0	0	0	0	0	0	0	0	0	0	0	0	0	0	0	0	0	0	0	0	0	0	0	0	0	0	0	0	0	0
N-Formylmethionine	0	0	0	13.4245	14.7351	12.7223	12.4891	0	0	0	0	0	0	0	0	0	13.5412	14.032	13.8457	0	14.6284	0	13.7617	14.8103	14.2167	0	0	13.8052	14.3563	0	13.6046	14.2801
N-Methylaspartate	0	0	0	0	0	0	0	0	0	0	0	0	0	0	0	0	0	0	0	0	0	0	0	0	0	0	0	0	0	0	0	0
N-Methylglutamate	0	0	0	0	0	0	0	0	0	0	0	0	0	0	0	0	0	0	0	0	0	0	0	0	0	0	0	0	0	0	0	0
N-Methyltryptamine	0	0	0	0	0	0	0	0	0	0	0	0	0	0	0	0	0	0	0	0	0	0	0	0	0	0	0	0	0	0	0	0
N-Ribosylnicotinamide	0	0	0	0	0	0	0	0	0	0	0	0	0	0	0	0	0	0	0	0	0	0	0	0	0	0	0	0	0	0	0	0
N-Undecanoylglycine	24.98	21.725	21.7533	21.7775	20.8219	22.846	23.5087	21.7524	22.6281	25.5337	21.8735	23.0071	22.6835	22.6803	23.145	22.4575	22.4935	22.9424	23.1744	21.2788	22.9846	22.4467	22.4383	23.6756	27.7487	22.996	22.3883	23.4047	24.0098	22.0469	24.8457	23.8298
N,N-Dimethylarginine	19.8399	20.039	20.1494	20.2841	20.0416	20.0872	20.1026	19.9377	18.5244	19.1036	18.694	18.1063	18.9831	18.3544	18.8858	18.1056	20.0199	19.9694	20.0852	19.7285	19.791	19.781	20.1457	19.5864	19.2518	19.3257	18.8128	19.5046	18.7283	19.4616	19.1362	18.9954
N,N-Dimethyllysine	0	0	0	0	0	0	0	0	0	0	0	0	0	0	0	0	0	0	0	0	0	0	0	0	0	0	0	0	0	0	0	0
N,N,N-Trimethyllysine	18.622	18.5141	18.6715	18.8443	18.8275	18.6821	18.6834	19.2812	17.4321	17.3334	0	17.6533	17.1215	17.5243	16.8638	0	17.8099	17.157	18.2695	18.2595	18.6354	16.9386	17.7056	16.897	14.7851	16.0318	16.874	16.4294	16.7614	17.2825	16.6025	17.8303
N6-(delta2-Isopentenyl)-adenine	0	0	0	0	0	0	0	0	0	0	0	0	0	0	0	0	0	0	0	0	0	0	0	0	0	0	0	0	0	0	0	0
NAD+	22.5286	22.4509	22.508	22.6792	22.7646	22.7592	22.6682	22.858	21.8235	21.9144	22.0474	22.1937	22.1284	22.4384	22.2097	22.2954	21.642	21.8226	21.7359	21.4858	21.6684	21.6734	21.8296	22.0493	21.4114	21.3565	21.4082	21.6936	21.652	21.6646	21.5383	21.6428
NADH	18.0576	17.4939	17.8504	17.7414	17.9928	17.9863	17.9419	18.3756	15.7264	16.0082	15.9957	15.7084	15.3196	16.2311	16.7578	16.682	16.4185	15.8287	15.9618	16.4255	16.2655	14.198	15.893	16.6353	15.2014	14.884	14.4603	14.3295	14.7279	15.8903	15.3279	15.1485
NADP+	18.9337	18.6198	18.3394	18.6988	19.1876	18.4621	18.707	19.0059	16.3978	16.9322	17.5603	16.9496	15.168	15.8766	16.526	16.6716	17.2226	17.0679	18.2562	17.1451	18.4745	17.5467	18.0992	17.3856	17.5808	18.3686	0	16.8589	18.5578	18.3918	18.1647	18.1729
NADPH	16.9001	15.0653	16.9282	17.3316	17.3731	17.8443	17.5252	17.9304	14.5272	15.3666	15.9778	16.7632	16.5811	17.554	16.6242	16.4321	0	0	0	0	0	0	0	0	0	0	0	0	0	0	0	0
Nicotinamide	22.5418	22.7601	23.0038	22.4784	22.6376	22.9169	22.7319	0	0	0	0	0	0	0	0	0	24.9307	25.5354	25.2696	25.2449	25.1002	25.4346	25.4349	25.6007	24.442	24.2989	24.6003	24.3522	24.9014	24.5191	24.2484	24.7811
Nicotinamide hypoxanthine dinucleotide	0	0	0	0	0	0	0	0	0	0	0	0	0	0	0	0	0	0	0	0	0	0	0	0	0	0	0	0	0	0	0	0
Nicotinamide mononucleotide	0	0	0	0	0	0	0	0	0	0	0	0	0	0	0	0	0	0	0	0	0	0	0	0	0	0	0	0	0	0	0	0
Nicotinate	0	0	0	0	0	0	0	0	0	0	0	0	0	0	0	0	0	0	0	0	0	0	0	0	0	0	0	0	0	0	0	0
Norleucine	0	0	0	0	0	0	0	0	0	0	0	0	0	0	0	0	0	0	0	0	0	0	0	0	0	0	0	0	0	0	0	0
Normetanephrine	0	0	0	0	0	0	0	0	0	0	0	0	0	0	0	0	0	0	0	0	0	0	0	0	0	0	0	0	0	0	0	0
Norvaline	0	0	0	0	0	0	0	0	0	0	0	0	0	0	0	0	0	0	0	0	0	0	0	0	0	0	0	0	0	0	0	0
O-Acetylserine	0	0	0	0	0	0	0	0	0	0	0	0	0	0	0	0	0	0	0	0	0	0	0	0	0	0	0	0	0	0	0	0
O-Succinyl homoserine	0	0	0	0	0	0	0	0	0	0	0	0	0	0	0	0	0	0	0	0	0	0	0	0	0	0	0	0	0	0	0	0
Octenoylglycine	0	0	0	0	0	0	0	0	0	0	0	0	0	0	0	0	0	0	0	0	0	0	0	0	0	0	0	0	0	0	0	0
Octopamine	0	0	0	0	0	0	0	0	0	0	0	0	0	0	0	0	0	0	0	0	0	0	0	0	0	0	0	0	0	0	0	0
Oleamide	20.3583	20.5237	20.2927	20.5223	20.3344	20.4228	20.0904	19.5517	20.7174	20.4031	19.5542	20.1995	19.5962	20.4089	20.7007	20.3001	18.5713	18.7293	17.9558	18.0977	18.5538	16.8708	18.3903	0	19.1243	19.4967	19.1425	18.7463	20.0182	19.3547	18.4328	19.3464
Ophthalmate	19.7926	19.6789	19.9095	20.0111	20.1146	20.2795	20.0917	19.9212	18.9391	19.0063	19.0627	19.3663	19.3106	19.5749	19.2309	19.5892	18.3252	18.5207	18.8088	19.0633	18.6755	18.7136	19.1302	18.5827	17.8745	17.1604	16.1011	18.8975	18.763	18.9276	18.4703	18.6451
Ornithine	18.401	19.2894	20.9357	19.4786	18.0853	18.5708	18.3664	17.7575	16.6096	18.3801	17.0578	17.0181	15.3279	15.206	15.2639	16.8658	16.511	17.6473	18.1926	19.1482	18.7652	18.6863	18.9577	17.6746	18.3596	16.9547	17.4632	18.5288	17.8595	19.3323	18.7005	19.994
Orotate	0	0	0	0	0	0	0	0	0	0	0	0	0	0	0	0	0	0	0	0	0	0	0	0	0	0	0	0	0	0	0	0
Oxalate	23.2968	23.2286	23.5064	23.8257	23.7655	23.8353	23.7414	24.0597	23.7624	24.0423	24.1646	24.0728	24.1974	24.3348	24.2337	24.2237	24.2662	24.1989	24.2873	24.3543	24.4305	24.4422	24.6522	24.9442	24.2011	24.2782	24.2281	24.4959	24.3565	24.1659	24.4704	24.4451
Oxoadipate	0	0	0	0	0	0	0	0	0	0	0	0	0	0	0	0	0	0	0	0	0	0	0	0	0	0	0	0	0	0	0	0
Oxohexanoic acid	24.2556	24.1136	24.3243	24.3777	24.5568	24.4179	24.0742	24.1533	24.5979	23.9359	23.9175	24.0616	24.1701	23.6684	23.7905	24.0502	23.127	23.0735	23.5117	24.1721	23.7788	23.948	23.6943	23.7574	24.4743	23.9858	24.0144	23.8302	24.056	23.7482	23.9805	24.1546
Oxoproline	0	0	0	0	0	0	0	0	0	0	0	0	0	0	0	0	0	0	0	0	0	0	0	0	0	0	0	0	0	0	0	0
P-DMEA	23.7724	23.5886	23.8178	23.9756	24.0457	23.9432	23.9277	24.1581	22.99	23.0099	23.1778	23.245	23.1782	23.4711	23.2513	23.3299	22.3518	22.3404	22.3774	22.2714	22.4822	22.3622	22.4814	22.6976	21.9069	21.8361	21.8713	22.2209	22.0264	22.0531	21.9975	22.1399
p-Hydroxyphenylacetate	0	0	0	0	0	0	0	0	0	0	0	0	0	0	0	0	0	0	0	0	0	0	0	0	0	0	0	0	0	0	0	0
Palatinose	0	0	15.0635	0	0	13.5799	17.4142	14.4418	0	18.0304	0	17.5321	15.6033	0	0	0	0	0	0	16.3178	15.9132	0	19.0207	0	17.2336	0	18.3812	15.0029	16.1368	17.8221	0	15.7373
Pantothenate	19.3963	19.6826	19.2423	19.1973	19.5598	19.6482	19.8217	19.1281	19.1111	18.8564	18.9571	19.1397	18.9734	19.0676	19.0675	19.0021	17.8842	18.0049	18.0988	17.8337	17.387	18.2149	17.8378	18.0709	17.0178	0	17.6	17.9435	17.4887	17.413	17.2842	17.7211
PC (20:0)	0	0	0	0	0	0	0	0	0	0	0	0	0	0	0	0	0	0	0	0	0	0	0	0	0	0	0	0	0	0	0	0
PC (32:0)	26.4011	26.2318	26.127	26.1158	26.2429	26.1639	26.0048	25.9359	26.7134	26.381	26.4727	26.4532	26.5081	26.4902	26.4861	26.507	27.8045	27.6861	27.7336	27.7039	27.6215	27.8017	27.7092	27.3726	27.665	27.6505	27.5538	27.6188	27.5305	27.3665	27.5262	27.3463
PC (32:1)	29.0663	29.0451	28.9755	28.9216	28.9675	28.9016	28.7434	28.719	29.1519	28.9386	29.1229	29.0701	29.0544	29.0773	29.0406	29.0475	27.9658	27.8225	27.8833	27.7938	27.7199	27.8975	27.806	27.5438	27.7441	27.7735	27.6698	27.7082	27.6799	27.4836	27.6409	27.5141
PC (32:2)	25.9629	25.9473	25.8868	25.8515	25.8882	25.8403	25.695	25.7397	25.993	25.8644	26.0489	25.9707	25.9966	26.0055	25.9395	25.9848	24.7581	24.6384	24.6626	24.5862	24.5434	24.7518	24.6225	24.4411	24.4038	24.581	24.5306	24.5242	24.4489	24.2454	24.4568	24.3538
PC (34:1)	29.4287	29.3674	29.2575	29.2109	29.2788	29.1807	29.0347	29.0447	29.6063	29.3203	29.465	29.4469	29.4405	29.4448	29.4196	29.4407	30.3954	30.3184	30.3467	30.2681	30.1906	30.3729	30.2958	29.9941	30.1998	30.2078	30.1215	30.1376	30.0853	29.9073	30.0919	29.9386
PC (34:2)	28.4145	28.3849	28.2931	28.278	28.2616	28.2477	28.0764	28.0949	28.467	28.2665	28.4537	28.4139	28.3703	28.4144	28.3899	28.3871	27.979	27.8342	27.9227	27.8206	27.7575	27.9324	27.876	27.629	27.6747	27.7613	27.6877	27.6868	27.6717	27.4854	27.6532	27.5301
PC (36:1)	26.9049	26.7936	26.6708	26.7141	26.7404	26.5968	26.529	26.4755	27.2766	27.0129	27.0851	27.0696	27.0918	27.0298	27.1047	27.0387	27.4717	27.2947	27.3686	27.3212	27.252	27.4261	27.2522	26.9106	27.2432	27.238	27.1182	27.1038	27.0675	26.8506	27.1163	26.9289
PC (36:2)	28.8394	28.7813	28.6848	28.6478	28.6964	28.6281	28.441	28.4541	28.9846	28.6943	28.8687	28.8513	28.8346	28.8128	28.8031	28.8209	29.4314	29.2986	29.3945	29.3077	29.2369	29.4136	29.306	29.0583	29.218	29.2282	29.1526	29.1736	29.1257	28.9236	29.102	28.9884
PC (36:4)	27.0698	27.133	27.055	27.0646	27.0196	27.0146	26.8134	26.9813	27.245	27.0535	27.2302	27.2369	27.1741	27.2267	27.1345	27.2047	27.7536	27.6703	27.7641	27.7083	27.6021	27.7597	27.7066	27.6139	27.4762	27.5678	27.5176	27.5076	27.4915	27.2988	27.488	27.3356
PC (36:5)	25.5739	25.5816	25.4894	25.5316	25.5918	25.5472	25.3545	25.5893	25.6554	25.503	25.6973	25.7489	25.6698	25.7348	25.6958	25.6869	25.7109	25.5929	25.7521	25.6638	25.5189	25.7162	25.6211	25.5974	25.4631	25.4457	25.464	25.5151	25.4646	25.3301	25.496	25.3771
PC (38:4)	27.0515	27.0397	26.9796	26.9119	26.9712	26.8466	26.7274	26.7915	27.1839	26.9633	27.1691	27.102	27.1126	27.1219	27.0486	27.0446	27.4795	27.3443	27.427	27.3739	27.2869	27.4698	27.3849	27.1541	27.1864	27.2143	27.1658	27.1527	27.1287	26.9685	27.1475	27.033
PC (38:5)	27.1276	27.1711	27.1195	27.1166	27.1169	27.0733	26.9328	26.8864	27.2733	27.0751	27.2868	27.2449	27.2292	27.2576	27.1683	27.235	28.2372	28.0546	28.2132	28.1086	28.0575	28.1897	28.116	27.9715	27.8974	27.9877	27.9288	27.9407	27.8808	27.7308	27.9633	27.7436
PC (40:4)	22.5039	22.1433	22.4321	21.8322	22.3128	22.1371	21.9223	21.949	22.4233	22.2681	22.1503	22.1424	22.1924	22.6053	22.0239	22.1168	24.3716	24.1196	24.3374	24.2707	24.145	24.1353	24.2082	24.0816	23.8885	24.109	23.939	24.0311	24.1359	23.8028	23.9709	23.7885
PC (40:5)	24.392	24.4843	24.5359	24.3251	24.3647	24.3321	24.2038	24.2403	24.6517	24.4151	24.5847	24.5436	24.5827	24.5422	24.5353	24.4761	26.0586	25.924	26.0088	25.9143	25.8798	26.0053	25.9011	25.7322	25.7318	25.862	25.8015	25.7542	25.7289	25.5393	25.7917	25.5667
PC (40:6)	25.7802	25.8109	25.7136	25.6584	25.6939	25.6727	25.4784	25.5719	25.801	25.6595	25.8658	25.8234	25.8415	25.8648	25.7359	25.7568	26.3714	26.2786	26.3708	26.2765	26.1562	26.3437	26.3003	26.166	25.9935	26.1078	26.0392	26.0325	25.9884	25.8583	26.0335	25.8553
PC (40:8)	22.7935	23.1163	22.7898	23.1127	23.0165	22.9769	22.9877	23.3183	23.1986	22.8607	23.0545	23.066	23.3528	22.9381	23.1189	23.2277	24.3088	24.1989	24.3153	24.2776	24.0784	24.2372	24.2517	24.3258	23.8607	23.8963	23.9975	24.0444	24.0113	23.6421	23.9014	24.0118
PC (44:8)	0	0	0	0	0	0	0	16.4272	0	17.1801	0	0	0	0	0	0	20.4669	20.411	20.334	20.8626	20.557	20.4809	20.1642	20.2547	18.5613	18.677	20.7423	18.28	20.5144	19.4184	19.6978	19.5912
PE (32:0)	22.7258	22.546	22.5745	22.5887	22.5371	22.3815	22.4973	22.2893	22.7226	22.5512	22.8358	22.8106	22.636	22.709	22.7196	22.6602	20.2996	20.013	20.7558	20.5597	19.7855	20.5324	19.4632	19.5467	19.9685	19.8758	20.7087	20.5674	18.9595	19.8794	20.0097	20.7046
PE (34:1)	25.3054	25.2791	25.2349	25.2463	25.2562	25.2249	25.0346	25.218	25.7342	25.4703	25.6403	25.6128	25.6044	25.6135	25.5891	25.6623	25.673	25.5898	25.6887	25.6436	25.6114	25.7272	25.6847	25.6188	25.7065	25.7618	25.6977	25.7124	25.6897	25.4824	25.6292	25.5685
PE (34:2)	23.1814	23.117	23.0382	23.1631	23.014	23.042	22.8822	23.1238	23.5041	23.2029	23.4939	23.3751	23.4003	23.3354	23.3967	23.517	22.8111	22.5999	22.8444	22.6959	22.6479	22.7956	22.8469	22.645	22.7619	22.7222	22.8368	22.7994	22.7203	22.6844	22.8068	22.602
PE (36:1)	26.9276	26.8721	26.8448	26.7607	26.8492	26.8003	26.6531	26.7311	27.4362	27.139	27.2818	27.277	27.2662	27.2602	27.3152	27.3177	27.2237	27.1381	27.2333	27.1625	27.1298	27.2485	27.1773	27.0109	27.3221	27.2847	27.185	27.2798	27.1719	26.9982	27.2058	27.0305
PE (36:2)	25.6336	25.5727	25.5622	25.5541	25.5794	25.5674	25.4251	25.6498	26.0386	25.7677	26.0409	25.9871	25.9753	25.987	25.9978	25.9963	26.1683	26.101	26.1909	26.1208	26.0514	26.2306	26.1812	26.1505	26.1809	26.3123	26.1706	26.2378	26.2044	26.003	26.154	26.0525
PE (36:3)	23.2478	23.1712	23.1721	23.032	23.0354	23.3108	23.1413	23.3964	23.5951	23.1132	23.5684	23.5129	23.693	23.3041	23.6587	23.4002	23.5226	23.3401	23.6163	23.4668	23.5534	23.703	23.3768	23.3555	23.4298	23.5807	23.3275	23.5883	23.4144	23.2637	23.6182	23.5067
PE (36:6)	0	0	0	0	0	0	0	0	0	0	0	0	0	0	0	0	0	0	0	0	0	0	0	0	0	0	0	0	0	0	0	0
PE (38:1)	24.9837	24.7796	24.7429	24.716	24.7884	24.7771	24.5382	24.6258	25.2398	24.9479	25.1324	24.9942	25.0313	25.0181	24.9894	25.0157	25.9601	25.878	25.8679	25.8359	25.7449	25.9505	25.7791	25.5665	25.7609	25.8241	25.7484	25.7419	25.6246	25.4777	25.6934	25.4952
PE (38:3)	24.672	24.6983	24.5833	24.726	24.6248	24.6404	24.4409	24.7355	25.1871	25.018	25.1698	25.0745	25.2129	25.1578	25.1774	25.2328	24.3941	24.3909	24.3595	24.4492	24.3181	24.5702	24.5521	24.3911	24.3395	24.6274	24.2569	24.533	24.4201	24.2835	24.497	24.3715
PE (38:4)	26.0735	26.0662	25.9792	26.0263	26.0936	26.0583	25.9206	26.2308	26.65	26.43	26.5766	26.5621	26.5696	26.5321	26.5737	26.6094	27.2842	27.2472	27.3471	27.3148	27.2842	27.4071	27.3479	27.3591	27.3436	27.4143	27.3437	27.4404	27.3419	27.2065	27.4108	27.2429
PE (38:5)	24.5043	24.5941	24.463	24.6759	24.5546	24.5327	24.3823	24.7685	24.9376	24.7947	25.0532	24.9651	24.9887	24.9915	24.8977	25.0068	25.92	25.8495	25.9057	25.8648	25.885	25.9028	25.932	25.9529	25.7929	25.9494	25.8608	25.9604	25.8942	25.7656	25.9025	25.7508
PE (38:6)	22.4549	22.6043	22.16	22.5685	22.3263	22.3394	22.2736	22.8304	22.6754	22.3103	22.6996	22.792	22.6647	22.5379	22.4703	22.2082	24.1895	24.1454	24.2114	24.1122	24.1471	24.1786	24.22	24.1953	24.0774	24.2139	24.0968	24.2424	24.1128	23.9519	24.2636	24.0095
PE (40:5)	24.1923	24.329	24.1328	24.3496	24.3221	24.2896	24.0573	24.4257	24.7533	24.4635	24.7251	24.7359	24.7655	24.636	24.6575	24.7518	25.5149	25.3667	25.519	25.5051	25.4696	25.6049	25.5539	25.4854	25.4325	25.5738	25.3896	25.5185	25.4595	25.2535	25.4341	25.361
PE (40:7)	22.8657	22.8468	22.6665	23.0232	22.8909	23.078	22.8041	23.3084	23.5661	23.023	23.3134	23.392	23.2245	23.1621	23.279	23.2864	24.7638	24.7104	24.7666	24.7967	24.7064	24.8974	24.3245	24.998	24.6618	24.8188	24.8148	24.9002	24.8094	24.6206	24.8913	24.7081
Pentanoate	0	0	0	0	0	0	0	0	0	0	0	0	0	0	0	0	0	0	0	0	0	0	0	0	0	0	0	0	0	0	0	0
Pentitols	0	0	0	0	0	0	0	0	0	0	0	0	0	0	0	0	0	0	0	0	0	0	0	0	0	0	0	0	0	0	0	0
Pentoses	13.7387	16.0058	14.6237	13.7691	15.8237	14.1185	15.9898	17.0481	15.4515	15.3091	15.0653	14.7757	13.9355	15.3927	15.93	15.709	15.0511	0	14.8286	0	14.1835	14.3545	15.5073	16.6301	15.6398	14.7247	15.9506	15.1006	14.1054	15.3623	0	16.6808
Phenethylamine	0	0	0	0	0	0	0	0	0	0	0	0	0	0	0	0	0	0	0	0	0	0	0	0	0	0	0	0	0	0	0	0
Phenylacetate	0	0	0	0	0	0	0	0	0	0	0	0	0	0	0	0	0	0	0	0	0	0	0	0	0	0	0	0	0	0	0	0
Phenylalanine	22.2204	22.0617	22.503	22.22	22.2443	22.2457	22.2026	22.162	22.2864	22.3403	21.7328	21.802	21.8931	21.9306	22.0209	21.8096	21.2235	21.3228	21.5199	20.9936	21.8531	21.3474	21.2504	21.5134	20.4369	21.2327	20.8	21.013	21.0352	20.9579	20.9732	21.3277
Phenylethanolamine	0	0	0	0	0	0	0	0	0	0	0	0	0	0	0	0	0	0	0	0	0	0	0	0	0	0	0	0	0	0	0	0
Phenylpyruvate	0	0	0	0	0	0	0	0	0	0	0	0	0	0	0	0	0	0	0	0	0	0	0	0	0	0	0	0	0	0	0	0
Phosphoenolpyruvate	0	0	0	0	14.1614	0	0	0	0	0	0	0	0	0	0	13.4015	0	0	13.8196	13.2432	13.2879	13.5694	0	15.9918	0	0	0	0	0	0	0	0
Phosphoethanolamine	23.6561	23.3849	23.6533	23.8961	23.8655	23.9326	23.8968	24.0907	23.0874	22.932	23.2029	23.1702	23.1389	23.4605	23.3074	23.3664	19.5446	19.5923	19.4526	19.443	18.9954	19.3774	19.3008	20.1522	19.281	18.3028	18.1223	19.2439	19.569	19.1276	19.6052	18.458
Phosphonoacetate	0	0	0	0	0	0	0	0	0	0	0	0	0	0	0	0	0	0	0	0	0	0	0	0	0	0	0	0	0	0	0	0
Phosphorylcholine	29.4948	29.3176	29.5178	29.6148	29.7479	29.6123	29.5568	29.4756	28.3107	28.5563	28.7279	28.8896	28.7785	28.9909	28.8475	28.9671	27.9035	28.0777	28.1768	27.8862	28.0443	27.9818	28.1054	27.8769	27.4154	27.4787	27.5193	27.6916	27.7575	27.6507	27.5392	27.7381
Phosphoserine	18.4434	17.4837	18.0168	18.501	18.8966	18.6713	18.5926	17.5097	0	0	0	0	0	0	0	0	17.71	17.8192	17.6185	16.9722	18.213	16.7276	18.6049	17.4574	0	15.6673	15.9753	0	15.4279	17.3777	15.4845	16.3401
PI (32:0)	19.3504	19.3994	18.3727	19.2821	18.2057	18.7294	18.5688	18.5266	19.6501	19.352	19.5478	19.2613	19.3696	19.6077	19.4633	19.4879	19.2319	19.8252	19.5342	19.2218	19.186	19.3387	19.1691	18.7357	18.7051	19.6969	19.9018	19.5297	19.5568	19.6773	19.36	19.2965
Pipecolate	0	0	0	0	0	0	0	0	0	0	0	0	0	0	0	0	0	0	0	0	0	0	0	0	0	0	0	0	0	0	0	0
Platelet-activating factor	24.8158	24.8534	24.6964	24.7419	24.75	24.7499	24.61	24.318	24.6734	24.4007	24.374	24.2495	24.356	24.4191	24.3398	24.3913	24.0571	23.8444	23.8328	23.7126	23.53	23.7467	23.6871	23.3988	23.2992	23.1963	22.991	22.9573	22.9757	22.8172	22.8919	22.8161
Pregnenolone sulfate	0	0	0	0	0	0	0	0	0	0	0	0	0	0	0	0	0	0	0	0	0	0	0	0	0	0	0	0	0	0	0	0
Proline	25.9109	25.9151	26.0056	26.295	26.1331	26.149	26.1137	25.7746	25.5375	25.4613	25.7233	25.6723	25.6489	25.7178	25.6235	25.7775	25.7233	25.839	25.8906	25.8281	25.802	25.7116	25.7845	25.4058	25.6102	25.5814	25.7691	25.7778	25.7327	25.8362	25.7064	25.5216
Propionyl-CoA	0	0	0	0	0	0	0	0	0	0	0	0	0	0	0	0	0	0	0	0	0	0	0	0	0	0	0	0	0	0	0	0
PS (34:2)	21.0431	20.8271	20.6661	20.7127	20.8815	20.5977	20.6031	19.9357	20.8642	20.913	20.851	20.6519	20.4334	21.0173	20.5033	20.693	19.8805	19.7529	19.1592	19.6695	19.3981	19.2288	19.1774	18.9541	18.4692	19.2255	19.3737	18.4537	19.4449	18.3262	18.6846	18.8126
PS (36:1)	26.4481	26.4284	26.3369	26.3353	26.4367	26.249	26.0995	26.1273	27.0369	26.8729	26.9273	26.9438	27.0128	26.8968	26.988	27.0522	26.328	26.288	26.2757	26.3035	26.1518	26.3589	26.2861	26.0221	26.4062	26.4999	26.3125	26.5042	26.3243	26.1699	26.3692	26.1671
PS (36:4)	18.5628	18.5361	17.9178	18.4372	18.4944	18.1371	18.1337	17.943	19.0838	18.256	18.0025	16.9807	18.8369	18.2723	18.6275	18.5148	19.529	19.5964	19.3352	19.1833	18.7479	19.6711	19.496	19.4822	19.0757	19.7996	19.0754	19.2459	19.3959	19.2766	18.1832	19.6765
PS (38:3)	24.0332	24.0421	23.8436	23.9546	24.0378	23.8916	23.6692	23.6728	24.3993	24.2433	24.2508	24.314	24.4201	24.4316	24.3803	24.4516	22.8184	22.6694	22.7219	22.7977	22.62	22.8297	22.6435	22.2862	22.6121	22.7862	22.5816	22.7742	22.5883	22.4265	22.6875	22.5554
PS (38:5)	20.3539	20.6248	20.2198	20.1412	20.5991	19.9723	20.1447	19.3562	20.7329	20.1368	20.2736	20.6051	20.1405	19.9753	20.4	20.2197	20.9538	20.7474	20.9676	20.7055	20.7103	20.881	20.795	20.3701	20.4545	20.7021	20.7051	20.6851	20.71	20.4499	20.0378	20.3384
PS (38:6)	17.915	16.9151	17.2384	16.678	16.5279	0	16.3719	17.2219	16.2283	17.247	0	17.5868	16.4979	0	0	17.6038	17.755	17.7791	18.3689	18.7182	16.8168	16.3522	17.352	15.7815	0	0	0	18.7646	15.5779	15.8485	18.1956	17.6003
PS (40:5)	24.0409	24.0253	23.913	23.9294	24.0495	23.882	23.7369	23.7589	24.3917	24.2311	24.3274	24.2442	24.3702	24.3529	24.2598	24.366	23.6674	23.6529	23.7324	23.6502	23.474	23.6495	23.6313	23.2949	23.4924	23.7092	23.4569	23.6262	23.4833	23.2577	23.4973	23.3572
PS (40:6)	24.3456	24.438	24.2618	24.2946	24.3338	24.2164	24.051	24.1051	24.6155	24.3859	24.4821	24.5594	24.4972	24.5788	24.5385	24.6271	23.6296	23.6574	23.7102	23.7042	23.4556	23.7572	23.6905	23.4099	23.4943	23.6428	23.4952	23.6429	23.4852	23.3517	23.4493	23.3732
PS (40:7)	19.058	19.6224	19.0665	19.3892	19.114	18.9796	18.7504	18.6045	19.6552	18.021	18.4436	19.5498	18.9084	17.9342	18.8433	18.6864	20.1781	19.2747	19.3845	19.2975	19.4983	19.8446	18.7324	18.5327	19.283	19.1319	19.2075	18.9223	19.5257	19.1677	18.4772	18.6521
Psicose	0	0	0	0	0	0	0	0	0	0	0	0	0	0	0	0	0	0	0	0	0	0	0	0	0	0	0	0	0	0	0	0
Purine	0	0	0	0	0	0	0	0	0	0	0	0	0	0	0	0	0	0	0	0	0	0	0	0	0	0	0	0	0	0	0	0
Pyridoxal	0	0	0	0	0	0	0	0	0	0	0	0	0	0	0	0	0	0	0	0	0	0	0	0	0	0	0	0	0	0	0	0
Pyridoxal phosphate	0	0	0	0	0	0	0	0	0	0	0	0	0	0	0	0	0	0	0	0	0	0	0	0	0	0	0	0	0	0	0	0
Pyridoxamine	0	0	0	0	0	0	0	0	0	0	0	0	0	0	0	0	0	0	0	0	0	0	0	0	0	0	0	0	0	0	0	0
Pyridoxine	0	0	0	0	0	0	0	0	0	0	0	0	0	0	0	0	19.4792	18.8262	19.6177	19.0151	18.6462	19.4224	18.9111	18.3726	0	0	17.6939	17.3215	16.2031	0	0	0
Pyrocatechol	0	0	0	0	0	0	0	0	0	0	0	0	0	0	0	0	0	0	0	0	0	0	0	0	0	0	0	0	0	0	0	0
Pyroglutamate	0	0	0	0	0	0	0	0	0	0	0	0	0	0	0	0	0	0	0	0	0	0	0	0	0	0	0	0	0	0	0	0
Pyrrole 2-carboxylate	0	0	0	0	0	0	0	0	0	0	0	0	0	0	0	0	0	0	0	0	0	0	0	0	0	0	0	0	0	0	0	0
Pyruvate	0	0	0	0	0	0	0	0	0	0	0	0	0	0	0	0	0	0	0	0	0	0	0	0	0	0	0	0	0	0	0	0
Quinate	0	0	0	0	0	0	0	0	0	0	0	0	0	0	0	0	0	0	0	0	0	0	0	0	0	0	0	0	0	0	0	0
Quinolinate	14.8344	14.9811	15.8604	15.2243	0	14.9522	15.7215	17.0717	0	0	0	16.5319	0	0	15.884	0	16.182	15.9385	15.8728	16.4293	15.8001	0	0	17.7589	0	16.4197	16.2151	16.7236	16.7578	15.6904	16.8475	16.2881
Quinoline	0	0	0	0	0	0	0	0	0	0	0	0	0	0	0	0	0	0	0	0	0	0	0	0	0	0	0	0	0	0	0	0
Raffinose	0	0	0	0	0	0	0	0	0	0	0	0	0	0	0	0	0	0	0	0	0	0	0	0	0	0	0	0	0	0	0	0
Resorcinol monoacetate	20.9296	22.2614	21.0442	21.2682	21.1545	21.3852	21.9064	20.8984	22.2029	22.5382	22.8039	21.9975	22.6692	22.6976	22.4981	22.2237	22.545	22.6383	22.0315	22.3006	21.7349	22.1217	22.0081	22.0264	22.6872	22.9089	22.2008	22.2424	21.988	22.1517	22.8479	22.4564
Riboflavin	0	0	0	0	0	0	0	0	0	0	0	0	0	0	0	0	0	0	0	0	0	0	0	0	0	0	0	0	0	0	0	0
Ribulose/Ribose/Xylulose 5-phosphate	14.8075	14.7084	13.3442	0	13.1978	0	0	0	0	0	16.0378	0	15.0015	14.4199	14.6005	14.8903	15.7447	0	15.6131	0	0	0	0	0	0	0	0	0	0	15.4457	14.9348	15.1957
Rosmarinate	0	0	0	0	0	0	0	0	0	0	0	0	0	0	0	0	0	0	0	0	0	0	0	0	0	0	0	0	0	0	0	0
S-Acetylthioethanolamine	0	0	0	0	0	0	0	0	0	0	0	0	0	0	0	0	0	0	0	0	0	0	0	0	0	0	0	0	0	0	0	0
S-Adenosylhomocysteine	16.7404	16.9194	0	0	15.404	17.5358	17.6256	0	0	0	0	0	0	0	0	0	0	0	0	0	0	0	17.0819	0	0	0	0	0	0	0	0	0
S-Adenosylmethionine	23.9037	23.6069	23.7953	23.8602	24.0719	23.9827	23.9581	23.5532	22.4148	22.669	22.7245	22.8996	22.6523	23.0399	22.9183	22.995	23.6084	23.5332	23.8528	23.364	23.6793	23.5621	23.8134	23.4138	23.0358	23.064	22.9992	23.2191	23.277	23.4126	23.0832	23.2885
S-Carboxymethylcysteine	0	0	0	0	0	0	0	0	0	0	0	0	0	0	0	0	0	0	0	0	0	0	0	0	0	0	0	0	0	0	0	0
S-Hexyl glutathione	0	0	0	0	0	0	0	0	0	0	0	0	0	0	0	0	0	0	0	0	0	0	0	0	0	0	0	0	0	0	0	0
S-Methylthioadenosine	18.7045	19.2251	19.0128	19.1347	19.4887	18.8957	18.7723	17.6308	15.989	16.8694	17.564	17.822	17.4451	16.4218	18.0059	17.6813	18.2494	16.6624	18.373	17.475	18.3261	19.3088	18.6571	16.6468	17.0346	17.6519	18.4058	17.5144	18.2104	18.6637	17.9821	18.4529
SAICAR	0	0	0	0	0	0	0	0	0	0	0	0	0	0	0	0	0	0	0	0	0	0	0	0	0	0	0	0	0	0	0	0
Salicylamide	0	0	0	0	0	0	0	0	0	0	0	0	0	0	0	0	0	0	0	0	0	0	0	0	0	0	0	0	0	0	0	0
Salicylate	22.3516	21.9187	22.5318	22.2112	21.9161	22.0231	22.133	22.5734	22.7672	22.7431	22.4345	23.1084	22.7091	23.0273	22.8666	23.2962	22.7418	22.2888	23.0411	23.1037	23.0516	23.4455	23.4508	23.0595	23.5082	22.7364	23.633	23.1645	23.2881	23.4112	23.1025	23.5843
Salsolinol	0	0	0	0	0	0	0	0	0	0	0	0	0	0	0	0	0	0	0	0	0	0	0	0	0	0	0	0	0	0	0	0
Sarcosine	0	0	0	0	0	0	0	0	0	0	0	0	0	0	0	0	0	0	0	0	0	0	0	0	0	0	0	0	0	0	0	0
Sebacate	0	0	0	0	0	0	0	0	0	0	0	0	0	0	0	0	0	0	0	0	0	0	0	0	0	0	0	0	0	0	0	0
Sedoheptulose 7-phosphate	18.0128	16.7698	18.0163	15.3148	17.602	17.326	15.2539	17.7095	0	0	16.1126	0	0	0	0	0	0	0	16.4627	15.5146	0	0	0	15.8376	0	0	16.6436	0	0	0	16.5857	0
Selenomethionine	0	0	0	0	0	0	0	0	0	0	0	0	0	0	0	0	0	0	0	0	0	0	0	0	0	0	0	0	0	0	0	0
Ser-Arg	0	0	0	0	0	0	0	0	0	0	0	0	0	0	0	0	0	0	0	0	0	0	0	0	0	0	0	0	0	0	0	0
Serine	21.0643	21.2689	21.6458	21.4142	21.2785	21.2206	21.3869	21.0577	20.1018	20.4743	20.0274	20.4644	20.1193	20.1391	19.7394	20.1868	21.2037	21.3545	21.4607	21.0358	21.3765	21.3926	21.2776	21.4122	20.5638	20.8168	20.8416	20.8721	20.8925	20.9013	21.0704	20.9068
Serotonin	0	0	0	0	0	0	0	0	0	0	0	0	0	0	0	0	0	0	0	0	0	0	0	0	0	0	0	0	0	0	0	0
Shikimate	0	0	0	0	0	0	0	0	0	0	0	0	0	0	0	0	0	0	0	0	0	0	0	0	0	0	0	0	0	0	0	0
SM (d18:1/14:0)	24.1039	24.0204	23.8752	23.8695	23.9301	23.8493	23.6748	23.5364	24.0575	23.8965	23.9584	23.9138	23.982	23.9889	23.8683	23.9267	23.0279	22.6814	22.8298	22.7932	22.7174	22.7028	22.691	22.2966	22.4725	22.576	22.4423	22.578	22.4545	22.1363	22.5068	22.2636
SM (d18:1/16:0)	28.7182	28.6376	28.5204	28.464	28.5546	28.4451	28.2935	28.2278	28.809	28.6473	28.7181	28.6963	28.7038	28.7244	28.7302	28.7467	26.8443	26.8102	26.8245	26.7781	26.6605	26.8007	26.7308	26.3745	26.6637	26.7241	26.6125	26.6501	26.619	26.382	26.5763	26.4435
SM (d18:1/18:0)	24.3779	24.1645	24.0381	24.0535	24.1784	23.9509	23.9302	23.8465	24.5847	24.4034	24.4981	24.5185	24.5121	24.3577	24.6239	24.494	21.7977	21.7007	21.7728	21.6211	21.482	21.6316	21.6254	20.9636	21.5886	21.1424	21.4346	21.5135	21.168	20.8979	20.9215	20.8573
SM (d18:1/18:1)	21.3625	21.271	21.2141	21.2751	21.1495	21.2925	20.932	21.0655	21.1129	20.7616	20.615	21.1824	21.2589	21.0774	20.9112	20.5885	20.624	20.1447	20.8933	20.738	20.3417	20.6656	20.2378	19.7838	20.5253	20.1048	19.8914	19.8849	19.9417	18.5402	19.6229	19.7436
SM (d18:1/22:0)	23.4506	23.2477	23.2439	23.1308	23.2584	23.3685	23.0502	23.2341	24.2821	23.8956	24.0557	24.0035	24.0598	23.9102	24.1273	24.1514	18.1843	16.657	0	0	16.6115	17.4209	15.9487	0	15.3739	16.2053	16.5605	18.0414	17.6099	15.9631	16.4929	0
Sphinganine	22.5384	22.419	22.4636	22.426	22.5207	22.594	22.4242	22.5263	23.4302	23.3899	23.4653	23.4055	23.4362	23.4401	23.4043	23.3632	23.2055	23.29	23.2334	23.2388	23.2296	23.3223	23.2387	22.9972	23.4278	23.6398	23.5342	23.597	23.5174	23.4047	23.4458	23.3604
Sphingosine	0	0	0	0	0	0	0	0	0	0	0	0	0	0	0	0	0	0	0	0	0	0	0	0	0	0	0	0	0	0	0	0
Stachydrine	0	0	0	0	0	0	0	0	0	0	0	0	0	0	0	0	0	0	0	0	0	0	0	0	0	0	0	0	0	0	0	0
Stachyose	0	0	0	0	0	0	0	0	0	0	0	0	0	0	0	0	0	0	0	0	0	0	0	0	0	0	0	0	0	0	0	0
Suberate	0	0	19.5643	0	0	19.4101	19.4019	20.1942	0	23.0964	20.1245	20.6274	20.2037	0	20.3323	19.9531	19.9106	0	19.8171	20.4168	19.9585	20.7883	20.6264	21.341	0	0	20.9487	0	20.3325	20.4636	20.8299	20.4991
Succinate	20.7046	20.9118	21.7506	21.3646	21.2514	21.1553	21.7098	21.1756	21.412	22.0964	22.1113	21.7235	21.3425	21.1119	21.2404	22.1353	21.2584	22.6533	21.9428	21.7179	22.5057	21.7813	21.602	21.9594	22.2617	22.9497	22.3225	21.2843	21.8293	21.8392	21.4646	22.0252
Succinyl-CoA	0	0	0	0	0	0	0	0	0	0	0	0	0	0	0	0	0	0	0	0	0	0	0	0	0	0	0	0	0	0	0	0
Sucrose	0	0	0	0	0	0	0	0	0	0	0	0	0	0	0	0	0	0	0	0	0	0	0	0	0	0	0	0	0	0	0	0
Sulfolactate	22.7112	19.5261	22.2834	20.6688	21.5448	22.0989	20.1094	22.2036	22.8044	22.3725	22.2231	22.9924	22.6553	21.848	20.3766	22.5526	20.6033	20.4479	22.7402	22.5437	22.8887	23.5902	21.1875	21.7439	22.8026	22.4283	22.2488	21.7528	22.2938	24.0153	22.3182	23.6917
Tartrate	0	0	0	0	0	0	0	0	0	0	0	0	0	0	0	0	0	0	0	0	0	0	0	0	0	0	0	0	0	0	0	0
Taurine	24.2787	24.2888	24.2927	24.4478	24.4701	24.4376	24.3384	24.3728	23.9348	23.8903	23.9196	23.8845	23.964	24.0408	23.9938	23.9748	24.8992	25.0006	24.9055	24.8756	24.9226	24.8919	24.9688	25.0331	24.6256	24.8611	24.8353	24.9002	24.7926	24.7934	24.7987	24.7214
Taurocyamine	0	0	0	0	0	0	0	0	0	0	0	0	0	0	0	0	0	0	0	0	0	0	0	0	0	0	0	0	0	0	0	0
Theanine	14.9405	16.5318	0	16.2331	15.7443	0	16.0163	0	0	0	16.0764	15.8914	0	16.8186	0	0	0	0	0	0	16.446	0	16.3878	0	0	0	0	0	0	0	16.7458	0
Theophylline	0	0	0	0	0	0	0	0	0	0	0	0	0	0	0	0	0	0	0	0	0	0	0	0	0	0	0	0	0	0	0	0
Thiamine	0	0	0	0	0	0	0	0	15.0391	0	0	0	0	0	0	0	0	0	0	0	0	0	0	0	16.2052	0	0	0	0	0	0	0
Thiamine monophosphate	14.378	0	0	0	0	0	14.4958	14.8839	0	0	0	15.0107	0	0	0	0	0	0	0	14.9213	0	0	0	0	0	0	0	0	0	0	0	0
Thioproline	0	0	0	0	0	0	0	0	0	0	0	0	0	0	0	0	0	0	0	0	0	0	0	0	0	0	0	0	0	0	0	0
Thiopurine S-methylether	0	0	0	0	0	0	0	0	0	0	0	0	0	0	0	0	0	0	0	0	0	0	0	0	0	0	0	0	0	0	0	0
Thr-Arg	0	0	0	0	0	0	0	0	0	0	0	0	0	0	0	0	0	0	0	0	0	0	0	0	0	0	0	0	0	0	0	0
Threonate	0	0	0	0	0	0	0	0	0	0	0	0	0	0	0	0	0	0	0	0	0	0	0	0	0	0	0	0	0	0	0	0
Threonine	0	0	0	0	0	0	0	0	0	0	0	0	0	0	0	0	0	0	0	0	0	0	0	0	0	0	0	0	0	0	0	0
Thymidine	0	0	0	0	0	0	0	0	0	0	0	0	0	0	0	0	0	0	0	0	0	0	0	0	0	0	0	0	0	0	0	0
Thymidine monophosphate	0	0	0	0	0	0	0	0	0	0	0	0	0	0	0	0	0	0	0	0	0	0	0	0	0	0	0	0	0	0	0	0
Thymine	0	0	0	0	0	0	0	0	0	0	0	0	0	0	0	0	0	0	0	0	0	0	0	0	0	0	0	0	0	0	0	0
Thyrotropin releasing hormone	0	0	0	0	0	0	0	0	0	0	0	0	0	0	0	0	0	0	0	0	0	0	0	0	0	0	0	0	0	0	0	0
trans-4-Hydroxyproline	24.2565	24.7158	24.557	24.6252	24.5694	24.5488	24.4005	25.996	24.1741	24.2591	24.437	24.3382	24.2848	24.4052	24.395	24.3953	24.1099	24.5591	24.2027	24.4576	24.2767	24.5024	24.392	26.2126	24.4227	24.5851	24.4836	24.6332	24.5122	24.1695	24.5285	24.4447
trans-Aconitate	20.0564	19.805	20.2159	20.2078	20.2972	20.2315	20.2731	20.3548	19.6975	19.7364	19.4821	19.5539	19.5124	19.8379	19.8119	19.8826	18.4217	18.6738	18.5566	18.0377	18.6474	18.5038	18.552	18.7429	18.2449	17.1078	17.8368	17.4176	17.6361	17.9749	17.6575	18.1902
Trehalose	0	0	0	0	0	0	0	0	0	0	0	0	0	0	0	0	0	0	0	0	0	0	0	0	0	0	0	0	0	0	0	0
Trigonelline	19.341	19.4379	19.0466	19.7583	19.7913	19.523	18.9057	19.551	0	0	19.2165	19.182	19.4287	0	0	19.3931	21.0459	20.9958	21.0955	20.5668	20.7729	20.4696	20.5965	21.2642	20.4531	20.5296	20.2966	20.5428	20.2577	20.5631	20.3415	20.4759
Trimethylamine	0	0	0	0	0	0	0	0	0	0	0	0	0	0	0	0	0	0	0	0	0	0	0	0	0	0	0	0	0	0	0	0
Tryptamine	0	0	0	0	0	0	0	0	0	0	0	0	0	0	0	0	0	0	0	0	0	0	0	0	0	0	0	0	0	0	0	0
Tryptophan	18.7301	18.793	18.8217	18.5368	18.4055	18.4421	18.5401	18.2933	18.5238	18.6559	18.1161	17.4962	18.0008	18.1805	17.7518	18.2153	15.7633	0	0	0	0	0	0	0	0	0	0	0	0	0	0	0
Tryptophanamide	0	0	0	0	0	0	0	0	0	0	0	0	0	0	0	0	0	0	0	0	0	0	0	0	0	0	0	0	0	0	0	0
Tyr-Arg	0	0	0	0	0	0	0	0	0	0	0	0	0	0	0	0	0	0	0	0	0	0	0	0	0	0	0	0	0	0	0	0
Tyramine	0	0	0	0	0	0	0	0	0	0	0	0	0	0	0	0	0	0	0	0	0	0	0	0	0	0	0	0	0	0	0	0
Tyrosine	20.0621	20.3485	20.2365	20.2885	20.4633	20.3871	20.2002	20.0808	19.6505	19.8206	19.676	19.8142	19.7278	19.9087	20.0683	19.8363	17.0054	17.8937	17.2335	17.4521	18.2754	17.9489	18.4658	16.9058	17.2653	16.8823	17.6445	17.5628	16.2048	16.8846	16.9073	18.6092
UDP-glucose	23.0204	22.928	23.1246	23.2697	23.2853	23.2954	23.2557	23.8076	22.3105	22.4254	22.7147	22.6618	22.6868	22.9563	22.7762	22.8585	24.5886	24.7146	24.6382	24.4509	24.6387	24.5865	24.7224	25.2149	23.8331	23.9874	23.9802	24.154	24.1759	24.1249	24.154	24.1248
UDP-N-acetylglucosamine	21.4225	21.1192	21.4864	21.5045	21.5444	21.6434	21.4804	21.9366	20.866	20.5471	21.0033	20.9018	20.9952	21.2354	20.9067	20.9198	22.924	22.9796	22.9702	22.75	22.9808	22.8634	23.0558	23.4862	22.3133	22.4614	22.4941	22.6193	22.5619	22.5387	22.4915	22.5383
Uracil	0	0	0	0	0	0	0	0	0	0	0	0	0	0	0	0	0	0	0	0	0	0	0	0	0	0	0	0	0	0	0	0
Uracil 5-carboxylate	0	0	0	0	0	0	0	0	0	0	0	0	0	0	0	0	0	0	0	0	0	0	0	0	0	0	0	0	0	0	0	0
Urate	0	0	0	0	0	0	0	0	0	0	0	0	0	0	0	0	0	0	0	0	0	0	0	0	0	0	0	0	0	0	0	0
Urea	0	0	0	0	0	0	0	0	0	0	0	0	0	0	0	0	0	0	0	0	0	0	0	0	0	0	0	0	0	0	0	0
Ureidopropionate	0	0	0	0	0	0	0	0	0	0	0	0	0	0	0	0	0	0	0	0	0	0	0	0	0	0	0	0	0	0	0	0
Ureidosuccinate	13.8985	0	0	15.7218	14.4441	0	13.5013	16.104	0	0	0	14.2459	0	0	0	0	0	16.8629	16.0732	13.7316	15.7014	14.0266	15.1839	0	0	14.7711	14.5503	0	14.4947	0	0	0
Uridine	0	0	14.8651	0	0	15.5835	14.4404	0	0	0	0	15.3601	16.5704	0	16.8289	16.6659	0	15.6245	0	0	0	16.1528	0	0	15.3259	0	0	0	0	15.6181	0	15.2942
Uridine diphosphate	19.5253	19.1038	19.713	19.8492	20.0537	19.8419	19.8112	20.373	19.3089	19.3279	19.6801	19.8611	19.7542	20.2671	20.027	19.9824	19.6628	19.791	19.9697	19.4848	19.8473	19.6997	20.0124	20.4052	20.2748	20.5703	20.6655	20.7486	20.6296	20.6289	20.5114	20.8318
Uridine monophosphate	16.1654	15.4891	16.3138	17.1196	17.3741	16.9202	16.4948	17.314	17.4201	17.6245	17.2913	17.8109	17.7505	18.0648	17.9931	17.8912	16.5304	17.1447	17.3084	17.3717	16.7944	17.2659	17.0244	17.7117	18.3971	18.7168	18.4047	18.6633	18.2138	18.4676	17.5817	17.9522
Uridine triphosphate	0	0	0	0	0	0	0	0	0	0	0	0	0	0	0	0	0	0	0	0	0	0	0	0	0	0	0	0	0	0	0	0
Urocanate	17.6114	21.3697	23.6991	21.2619	0	19.7203	17.8387	17.8542	19.3503	21.7309	0	19.339	18.2907	0	18.5706	19.807	18.5785	19.5452	18.8758	20.9796	20.5832	19.8186	19.8415	21.2051	18.2521	19.5679	20.538	19.8208	20.8705	21.755	20.0191	21.9744
Ursodeoxycholate	0	0	0	0	0	0	0	0	0	0	0	0	0	0	0	0	0	0	0	0	0	0	0	0	0	0	0	0	0	0	0	0
Val-Lys	21.0746	20.8479	21.1566	21.164	21.2151	21.1619	21.2865	21.2255	19.988	20.2502	20.35	20.3674	20.4938	20.6487	20.5927	20.4867	20.11	20.3212	20.7383	20.3065	20.4757	19.9445	20.5448	20.1265	19.7779	19.7273	20.0471	19.9911	20.058	20.0472	20.3024	19.6118
Val-Phe	0	0	0	0	0	0	0	0	0	0	0	0	0	0	0	0	0	0	0	0	0	0	0	0	0	0	0	0	0	0	0	0
Valine	0	0	0	0	0	0	0	0	0	0	0	0	0	0	0	0	0	0	0	0	0	0	0	0	0	0	0	0	0	0	0	0
Xanthine	0	15.2542	17.2628	15.1277	13.2977	15.3439	16.5809	15.0284	0	16.1554	0	15.0164	15.5974	0	16.239	17.053	0	16.1698	0	0	15.9654	16.49	16.452	16.2881	0	0	0	0	14.7224	16.2872	0	16.3596
Xanthosine	0	0	0	0	0	0	0	0	0	0	0	0	0	0	0	0	0	0	0	0	0	0	0	0	0	0	0	0	0	0	0	0
Xanthosine monophosphate	0	0	0	0	0	0	0	0	0	0	0	0	0	0	0	0	0	0	0	0	0	0	0	0	0	0	0	0	0	0	0	0
Xanthurenate	0	0	0	0	0	0	0	0	0	0	0	0	0	0	0	0	0	0	0	0	0	0	0	0	0	0	0	0	0	0	0	0

## Sheet: AML_Pipetted_vs_AML_Sorted
Metabolite	AML_Pipetted_log2_Mean	AML_Pipetted_log2_Adjusted_Mean	AML_Sorted_log2_Mean	AML_Sorted_log2_Adjusted_Mean	Log2 Fold Change (AML_Sorted / AML_Pipetted)	Fold Change (AML_Sorted / AML_Pipetted)	P	FDR	AML_Pipetted_1	AML_Pipetted_2	AML_Pipetted_3	AML_Pipetted_4	AML_Pipetted_5	AML_Pipetted_6	AML_Pipetted_7	AML_Pipetted_8	AML_Sorted_1	AML_Sorted_2	AML_Sorted_3	AML_Sorted_4	AML_Sorted_5	AML_Sorted_6	AML_Sorted_7	AML_Sorted_8
Arginine	26.8071	26.8071	25.769	25.769	-1.03814	0.486956	6.28633e-17	7.38643e-15	26.726	26.6654	26.6789	26.8299	26.8542	26.8446	26.8797	26.9781	25.926	25.8403	25.6498	25.6395	25.624	25.8123	25.755	25.9047
Sphinganine	22.489	22.489	23.4168	23.4168	0.927825	1.90241	5.80265e-17	7.38643e-15	22.5384	22.419	22.4636	22.426	22.5207	22.594	22.4242	22.5263	23.4302	23.3899	23.4653	23.4055	23.4362	23.4401	23.4043	23.3632
Argininosuccinate	18.721	18.721	14.344	14.344	-4.37701	0.0481269	1.33936e-16	1.04917e-14	18.4082	18.3568	18.4263	18.8865	18.695	18.9679	18.6175	19.4099	15.219	14.219	14.219	14.219	14.219	14.219	14.219	14.219
Glycerophosphocholine	24.801	24.801	23.6995	23.6995	-1.10148	0.466039	3.61288e-14	1.80267e-12	24.4476	24.541	24.7432	24.8074	24.8844	24.8146	24.8933	25.2763	23.3967	23.4849	23.7752	23.7199	23.661	23.9015	23.7869	23.8698
Isoleucine	22.8383	22.8383	21.7203	21.7203	-1.118	0.460733	3.83546e-14	1.80267e-12	22.8242	22.8317	22.905	22.9549	22.962	22.8269	22.7978	22.6038	21.8908	21.7089	21.64	21.6398	22.1605	21.5542	21.5894	21.5788
Glycerophosphoethanolamine	21.7864	21.7864	21.0982	21.0982	-0.688184	0.620635	9.54389e-13	3.73803e-11	21.697	21.5849	21.7216	21.8283	21.8504	21.7601	21.8332	22.0159	21.0487	20.9914	21.1326	21.0829	21.061	21.2149	21.1734	21.081
Aspartate	24.6527	24.6527	23.9834	23.9834	-0.669311	0.628807	4.43727e-12	1.30345e-10	24.5227	24.4007	24.6339	24.7033	24.7582	24.7353	24.6873	24.7799	23.8189	23.7986	24.0078	24.0021	23.9561	24.2074	23.9773	24.0987
P-DMEA	23.9036	23.9036	23.2067	23.2067	-0.696979	0.616862	3.93023e-12	1.30345e-10	23.7724	23.5886	23.8178	23.9756	24.0457	23.9432	23.9277	24.1581	22.99	23.0099	23.1778	23.245	23.1782	23.4711	23.2513	23.3299
Glutamine	28.4201	28.4201	27.8697	27.8697	-0.550387	0.682837	9.36511e-12	2.44534e-10	28.3273	28.316	28.3963	28.5849	28.5394	28.4819	28.4466	28.2681	27.6822	27.9128	27.8875	27.8459	27.8391	27.9928	27.8693	27.9277
PE (38:4)	26.0561	26.0561	26.5629	26.5629	0.506883	1.42098	3.37738e-11	7.585e-10	26.0735	26.0662	25.9792	26.0263	26.0936	26.0583	25.9206	26.2308	26.65	26.43	26.5766	26.5621	26.5696	26.5321	26.5737	26.6094
PS (36:1)	26.3076	26.3076	26.9663	26.9663	0.658687	1.57865	3.55043e-11	7.585e-10	26.4481	26.4284	26.3369	26.3353	26.4367	26.249	26.0995	26.1273	27.0369	26.8729	26.9273	26.9438	27.0128	26.8968	26.988	27.0522
S-Adenosylmethionine	23.8415	23.8415	22.7892	22.7892	-1.05231	0.482197	6.68409e-11	1.20828e-09	23.9037	23.6069	23.7953	23.8602	24.0719	23.9827	23.9581	23.5532	22.4148	22.669	22.7245	22.8996	22.6523	23.0399	22.9183	22.995
Serine	21.2921	21.2921	20.1566	20.1566	-1.13556	0.455159	6.40076e-11	1.20828e-09	21.0643	21.2689	21.6458	21.4142	21.2785	21.2206	21.3869	21.0577	20.1018	20.4743	20.0274	20.4644	20.1193	20.1391	19.7394	20.1868
Taurine	24.3659	24.3659	23.9503	23.9503	-0.415539	0.749739	7.9803e-11	1.33955e-09	24.2787	24.2888	24.2927	24.4478	24.4701	24.4376	24.3384	24.3728	23.9348	23.8903	23.9196	23.8845	23.964	24.0408	23.9938	23.9748
Acetylcholine	22.8437	22.8437	22.3125	22.3125	-0.531145	0.692005	1.07251e-10	1.57525e-09	22.7481	22.6918	22.7913	22.9681	22.9781	22.952	22.8387	22.7813	22.3487	22.1799	22.2806	22.3108	22.3346	22.5272	22.3399	22.1785
Deoxycarnitine	22.8442	22.8442	22.3125	22.3125	-0.531638	0.691769	1.02588e-10	1.57525e-09	22.7481	22.6918	22.7913	22.9681	22.9781	22.952	22.8426	22.7813	22.3487	22.1799	22.2806	22.3108	22.3346	22.5272	22.3399	22.1785
PE (36:1)	26.8049	26.8049	27.2866	27.2866	0.48178	1.39647	1.23506e-10	1.61244e-09	26.9276	26.8721	26.8448	26.7607	26.8492	26.8003	26.6531	26.7311	27.4362	27.139	27.2818	27.277	27.2662	27.2602	27.3152	27.3177
Phosphorylcholine	29.5422	29.5422	28.7586	28.7586	-0.783619	0.580908	1.17675e-10	1.61244e-09	29.4948	29.3176	29.5178	29.6148	29.7479	29.6123	29.5568	29.4756	28.3107	28.5563	28.7279	28.8896	28.7785	28.9909	28.8475	28.9671
Phosphoserine	18.2644	18.2644	14.4279	14.4279	-3.8365	0.0700002	1.49512e-10	1.84923e-09	18.4434	17.4837	18.0168	18.501	18.8966	18.6713	18.5926	17.5097	14.4279	14.4279	14.4279	14.4279	14.4279	14.4279	14.4279	14.4279
Carnitine (5:0)	20.5081	20.5081	19.723	19.723	-0.785152	0.580291	2.57177e-10	3.02183e-09	20.5086	20.4428	20.5012	20.4042	20.6848	20.5486	20.6226	20.3521	19.4171	19.7037	19.8515	19.6271	20.2035	19.418	20.0166	19.5463
N,N-Dimethylarginine	20.0602	20.0602	18.5946	18.5946	-1.46552	0.362104	3.77662e-10	4.22622e-09	19.8399	20.039	20.1494	20.2841	20.0416	20.0872	20.1026	19.9377	18.5244	19.1036	18.694	18.1063	18.9831	18.3544	18.8858	18.1056
Hydroxy-FA (8:0)	21.1732	21.1732	21.9215	21.9215	0.748277	1.67979	5.58496e-10	5.96576e-09	21.4624	21.1122	21.282	20.9742	21.1021	21.1356	21.3595	20.9576	22.2194	21.9156	21.8286	22.0842	21.9307	21.8521	21.5069	22.0343
PE (34:1)	25.2249	25.2249	25.6159	25.6159	0.390949	1.31126	1.15269e-09	1.17775e-08	25.3054	25.2791	25.2349	25.2463	25.2562	25.2249	25.0346	25.218	25.7342	25.4703	25.6403	25.6128	25.6044	25.6135	25.5891	25.6623
1-Phenylethanol	24.319	24.319	25.1761	25.1761	0.857039	1.81132	1.2941e-09	1.26714e-08	24.3124	24.4665	24.2345	24.6022	24.1296	24.3183	24.2343	24.2546	25.0707	25.2465	25.099	25.4579	25.1012	24.9393	25.3041	25.1898
PE (38:3)	24.6402	24.6402	25.1538	25.1538	0.513648	1.42766	4.35678e-09	4.09538e-08	24.672	24.6983	24.5833	24.726	24.6248	24.6404	24.4409	24.7355	25.1871	25.018	25.1698	25.0745	25.2129	25.1578	25.1774	25.2328
PE (36:2)	25.568	25.568	25.9739	25.9739	0.405815	1.32484	6.02726e-09	5.44771e-08	25.6336	25.5727	25.5622	25.5541	25.5794	25.5674	25.4251	25.6498	26.0386	25.7677	26.0409	25.9871	25.9753	25.987	25.9978	25.9963
Glycerophosphoinositol	20.6223	20.6223	19.8971	19.8971	-0.725215	0.604907	6.40647e-09	5.576e-08	20.5074	20.3196	20.485	20.7506	20.616	20.6023	20.7409	20.9568	19.702	19.7183	20.033	19.8077	19.9097	20.1255	19.8801	20.0008
Asparagine	23.2912	23.2912	22.5685	22.5685	-0.722711	0.605958	6.85867e-09	5.66404e-08	23.1128	23.0916	23.1799	23.2766	23.8795	23.3439	23.2636	23.1814	22.4085	22.3409	22.5978	22.8225	22.6482	22.6122	22.5462	22.5713
Hypotaurine	20.5322	20.5322	19.9715	19.9715	-0.560686	0.67798	6.98967e-09	5.66404e-08	20.3755	20.2672	20.5484	20.6656	20.679	20.5078	20.3087	20.9054	19.8372	19.862	20.0284	20.1035	19.8926	19.9668	20.1146	19.967
PE (38:5)	24.5594	24.5594	24.9544	24.9544	0.394995	1.31494	1.62229e-08	1.2708e-07	24.5043	24.5941	24.463	24.6759	24.5546	24.5327	24.3823	24.7685	24.9376	24.7947	25.0532	24.9651	24.9887	24.9915	24.8977	25.0068
Val-Lys	21.1415	21.1415	20.3972	20.3972	-0.744324	0.596947	2.1474e-08	1.62787e-07	21.0746	20.8479	21.1566	21.164	21.2151	21.1619	21.2865	21.2255	19.988	20.2502	20.35	20.3674	20.4938	20.6487	20.5927	20.4867
N-Acetylaspartate	25.8102	25.8102	25.0915	25.0915	-0.718707	0.607642	2.37548e-08	1.74449e-07	25.6913	25.5207	25.7388	25.8858	25.9414	25.8427	25.8152	26.0456	24.9414	24.9086	25.0767	25.1515	25.102	25.2834	25.076	25.1923
PC (36:1)	26.6781	26.6781	27.0886	27.0886	0.410505	1.32915	2.7613e-08	1.96638e-07	26.9049	26.7936	26.6708	26.7141	26.7404	26.5968	26.529	26.4755	27.2766	27.0129	27.0851	27.0696	27.0918	27.0298	27.1047	27.0387
Glutamate	27.8025	27.8025	27.3486	27.3486	-0.453853	0.73009	2.87122e-08	1.98452e-07	27.6086	27.5479	27.7822	27.9152	27.9269	27.8388	27.8269	27.9733	26.9705	27.1439	27.3647	27.4522	27.3257	27.5777	27.4523	27.502
NAD+	22.6521	22.6521	22.1314	22.1314	-0.520707	0.69703	3.19949e-08	2.14823e-07	22.5286	22.4509	22.508	22.6792	22.7646	22.7592	22.6682	22.858	21.8235	21.9144	22.0474	22.1937	22.1284	22.4384	22.2097	22.2954
Lyso-PC (18:1)	22.2928	22.2928	21.8015	21.8015	-0.491219	0.711424	4.10046e-08	2.67669e-07	22.7008	22.3917	22.2972	22.2485	22.2554	22.365	22.2189	21.8647	22.2589	21.9659	21.6871	21.6449	21.7425	21.688	21.7074	21.7178
Adenosine triphosphate	22.5687	22.5687	21.5745	21.5745	-0.994187	0.502019	4.83026e-08	3.06787e-07	22.0714	21.9155	22.6145	22.6209	22.805	22.7908	22.4735	23.2579	20.7294	21.1342	21.6926	21.6154	21.625	21.777	22.2052	21.8175
PE (40:5)	24.2623	24.2623	24.6861	24.6861	0.423787	1.34144	8.68728e-08	5.3724e-07	24.1923	24.329	24.1328	24.3496	24.3221	24.2896	24.0573	24.4257	24.7533	24.4635	24.7251	24.7359	24.7655	24.636	24.6575	24.7518
CDP-ethanolamine	20.4069	20.4069	19.8297	19.8297	-0.577158	0.670283	1.34197e-07	8.08621e-07	20.2822	20.1305	20.3244	20.4751	20.4956	20.5161	20.3342	20.6967	19.6612	19.6747	19.8847	19.8391	19.7095	19.942	19.9718	19.9547
UDP-glucose	23.2483	23.2483	22.6738	22.6738	-0.574576	0.671484	1.42471e-07	8.37016e-07	23.0204	22.928	23.1246	23.2697	23.2853	23.2954	23.2557	23.8076	22.3105	22.4254	22.7147	22.6618	22.6868	22.9563	22.7762	22.8585
Carnitine (16:0)	23.4155	23.4155	22.5511	22.5511	-0.864473	0.549247	1.54282e-07	8.84297e-07	23.4557	23.4851	23.3953	23.5473	23.4964	23.5378	23.3477	23.0589	22.7855	22.585	22.6388	22.5527	22.3585	22.4635	22.5153	22.5092
Cystathionine	15.8839	15.8839	14.2623	14.2623	-1.62164	0.324965	1.99198e-07	1.11456e-06	15.441	15.9523	14.2623	16.4284	16.5841	15.2623	16.8861	16.2549	14.2623	14.2623	14.2623	14.2623	14.2623	14.2623	14.2623	14.2623
UDP-N-acetylglucosamine	21.5172	21.5172	20.9219	20.9219	-0.595269	0.661921	2.11429e-07	1.15548e-06	21.4225	21.1192	21.4864	21.5045	21.5444	21.6434	21.4804	21.9366	20.866	20.5471	21.0033	20.9018	20.9952	21.2354	20.9067	20.9198
PC (32:0)	26.1529	26.1529	26.5015	26.5015	0.34858	1.27331	2.51482e-07	1.34314e-06	26.4011	26.2318	26.127	26.1158	26.2429	26.1639	26.0048	25.9359	26.7134	26.381	26.4727	26.4532	26.5081	26.4902	26.4861	26.507
Lyso-PC (16:0)	23.7184	23.7184	23.23	23.23	-0.488448	0.712792	3.34189e-07	1.74521e-06	23.9919	23.8395	23.7531	23.6301	23.7021	23.8021	23.6433	23.3854	23.6848	23.4475	23.1031	23.0131	23.2396	23.0419	23.1595	23.1506
PE (34:2)	23.0702	23.0702	23.4032	23.4032	0.33292	1.25956	3.75805e-07	1.91987e-06	23.1814	23.117	23.0382	23.1631	23.014	23.042	22.8822	23.1238	23.5041	23.2029	23.4939	23.3751	23.4003	23.3354	23.3967	23.517
Histidine	23.7601	23.7601	23.3574	23.3574	-0.402778	0.7564	3.99973e-07	1.99987e-06	23.5651	23.5522	23.8531	23.7671	23.8193	23.8027	23.7848	23.9368	22.8616	23.4422	23.3502	23.362	23.3045	23.5007	23.5829	23.4548
Carnitine (16:1)	20.4738	20.4738	17.7967	17.7967	-2.67714	0.156351	4.13935e-07	2.02656e-06	20.632	20.3078	20.4552	20.5939	20.6538	20.5022	20.5414	20.1044	19.2464	17.9856	16.4919	18.041	18.5874	18.2107	17.6352	16.1753
FA (8:0)	25.0249	25.0249	26.1552	26.1552	1.13022	2.18892	4.37998e-07	2.1006e-06	25.0307	24.6732	25.47	24.8951	25.3868	25.2148	24.4895	25.0395	26.827	26.3675	25.9826	25.8392	26.2154	25.8612	26.0169	26.1316
Proline	26.0371	26.0371	25.6453	25.6453	-0.39186	0.762146	4.66295e-07	2.19158e-06	25.9109	25.9151	26.0056	26.295	26.1331	26.149	26.1137	25.7746	25.5375	25.4613	25.7233	25.6723	25.6489	25.7178	25.6235	25.7775
Methionine	20.3652	20.3652	19.6046	19.6046	-0.760561	0.590267	4.79383e-07	2.20892e-06	20.2933	20.3551	20.2772	20.3652	20.5598	20.4876	20.3697	20.2134	19.7955	19.7907	19.7869	19.4795	19.2938	19.7279	19.2007	19.7618
3-Hydroxycarnitine (14:0)	16.2967	16.2967	14.3648	14.3648	-1.93194	0.262077	5.00549e-07	2.26209e-06	17.4353	16.5989	15.3551	16.246	16.5225	17.1513	16.2153	14.8494	16.4178	13.8494	13.8494	13.8494	13.8494	15.404	13.8494	13.8494
PS (40:5)	23.917	23.917	24.3179	24.3179	0.400947	1.32037	5.67089e-07	2.51445e-06	24.0409	24.0253	23.913	23.9294	24.0495	23.882	23.7369	23.7589	24.3917	24.2311	24.3274	24.2442	24.3702	24.3529	24.2598	24.366
Nicotinamide	22.5686	22.5686	21.4784	21.4784	-1.09019	0.4697	6.10918e-07	2.65863e-06	22.5418	22.7601	23.0038	22.4784	22.6376	22.9169	22.7319	21.4784	21.4784	21.4784	21.4784	21.4784	21.4784	21.4784	21.4784	21.4784
PS (38:3)	23.8931	23.8931	24.3614	24.3614	0.468267	1.38345	6.36992e-07	2.72169e-06	24.0332	24.0421	23.8436	23.9546	24.0378	23.8916	23.6692	23.6728	24.3993	24.2433	24.2508	24.314	24.4201	24.4316	24.3803	24.4516
2',4'-Dihydroxyacetophenone	21.356	21.356	22.4539	22.4539	1.09788	2.1404	7.42054e-07	3.04645e-06	20.9296	22.2614	21.0442	21.2682	21.1545	21.3852	21.9064	20.8984	22.2029	22.5382	22.8039	21.9975	22.6692	22.6976	22.4981	22.2237
3-Hydroxypyruvate	17.5184	17.5184	18.4949	18.4949	0.976561	1.96777	7.51889e-07	3.04645e-06	18.2199	17.8981	17.6232	17.2886	17.0636	17.1246	17.8908	17.0381	19.0318	18.5802	18.7394	18.4012	18.6647	18.486	18.5038	17.5522
Resorcinol monoacetate	21.356	21.356	22.4539	22.4539	1.09788	2.1404	7.42054e-07	3.04645e-06	20.9296	22.2614	21.0442	21.2682	21.1545	21.3852	21.9064	20.8984	22.2029	22.5382	22.8039	21.9975	22.6692	22.6976	22.4981	22.2237
NADH	17.93	17.93	16.0537	16.0537	-1.87634	0.272374	8.59051e-07	3.42164e-06	18.0576	17.4939	17.8504	17.7414	17.9928	17.9863	17.9419	18.3756	15.7264	16.0082	15.9957	15.7084	15.3196	16.2311	16.7578	16.682
Guanosine diphosphate mannose	16.4758	16.4758	13.9885	13.9885	-2.4873	0.17834	1.1159e-06	4.3706e-06	16.2541	15.7909	16.6115	16.5533	16.4766	16.6846	16.6111	16.8242	12.8355	12.8355	14.4443	12.8355	14.2603	15.2149	15.5381	13.9438
Decanoate	23.9653	23.9653	25.1902	25.1902	1.22482	2.33726	1.35503e-06	5.2202e-06	23.8852	23.5297	24.1997	24.0517	24.4617	24.4678	23.5059	23.6211	25.7864	25.6209	24.9588	24.6466	25.2827	24.9168	25.074	25.2351
Leucine	22.8842	22.8842	22.0314	22.0314	-0.852761	0.553724	1.56134e-06	5.82403e-06	22.8924	22.8511	22.8171	22.9609	23.0727	22.9884	22.8943	22.5965	22.0493	22.0129	21.7924	21.9345	22.0801	21.7397	22.8047	21.8379
PE (38:1)	24.744	24.744	25.0461	25.0461	0.302137	1.23297	1.55637e-06	5.82403e-06	24.9837	24.7796	24.7429	24.716	24.7884	24.7771	24.5382	24.6258	25.2398	24.9479	25.1324	24.9942	25.0313	25.0181	24.9894	25.0157
Oxalate	23.6574	23.6574	24.129	24.129	0.471548	1.3866	2.12251e-06	7.79359e-06	23.2968	23.2286	23.5064	23.8257	23.7655	23.8353	23.7414	24.0597	23.7624	24.0423	24.1646	24.0728	24.1974	24.3348	24.2337	24.2237
Hydroxy-FA (18:1)	22.6115	22.6115	23.3837	23.3837	0.772201	1.70787	2.85223e-06	1.03119e-05	23.4563	22.7381	22.4833	23.016	22.3974	22.0689	22.5112	22.2205	24.1963	23.4114	23.3132	23.4309	23.3174	23.2737	23.0445	23.0819
Citicoline	20.3357	20.3357	19.6872	19.6872	-0.648413	0.637982	2.91208e-06	1.03688e-05	20.1042	20.0786	20.2695	20.3904	20.4305	20.6312	20.3883	20.3925	19.0043	19.1765	19.8135	19.9017	19.6218	20.121	19.8935	19.9657
beta-Glycerophosphate	15.9198	15.9198	14.4528	14.4528	-1.467	0.361735	3.28163e-06	1.13409e-05	15.5425	15.3252	15.3715	16.0123	15.6305	16.659	16.5439	16.2738	14.4721	15.2869	13.9823	12.9823	15.0573	14.2859	15.0559	14.4999
Glycerol 3-phosphate	15.9198	15.9198	14.4528	14.4528	-1.467	0.361735	3.28163e-06	1.13409e-05	15.5425	15.3252	15.3715	16.0123	15.6305	16.659	16.5439	16.2738	14.4721	15.2869	13.9823	12.9823	15.0573	14.2859	15.0559	14.4999
Cyclic ADP-ribose	21.5008	21.5008	21.0073	21.0073	-0.493514	0.710293	3.60706e-06	1.22849e-05	21.3769	21.202	21.3387	21.5992	21.6211	21.5629	21.486	21.8195	20.8787	20.7727	21.0241	20.9917	20.9799	21.2779	21.0578	21.0755
Hydroxy-FA (10:0)	20.7431	20.7431	21.5401	21.5401	0.79697	1.73745	4.02731e-06	1.35203e-05	20.6143	20.6651	20.943	20.6794	20.737	20.889	21.1139	20.3036	22.0355	21.6309	21.3849	21.6607	21.1864	21.4585	21.3103	21.6536
Sedoheptulose 7-phosphate	17.0006	17.0006	14.4862	14.4862	-2.51445	0.175015	5.45376e-06	1.80512e-05	18.0128	16.7698	18.0163	15.3148	17.602	17.326	15.2539	17.7095	14.2539	14.2539	16.1126	14.2539	14.2539	14.2539	14.2539	14.2539
3-Hydroxycarnitine (4:0)	18.2862	18.2862	17.1257	17.1257	-1.16044	0.447377	6.42168e-06	2.09596e-05	18.1852	18.1147	18.8332	18.437	17.816	18.1276	18.3745	18.4011	17.0373	17.6175	17.2287	17.6743	17.6192	16.0373	17.7542	16.0373
FA (14:0)	25.41	25.41	26.6405	26.6405	1.23057	2.34659	7.85275e-06	2.52794e-05	26.0093	25.1126	25.4679	25.1939	25.0907	25.7301	25.0909	25.5843	28.0339	26.53	26.0537	26.5733	26.1783	26.097	26.7441	26.914
Acetylcarnitine	26.11	26.11	25.5627	25.5627	-0.547341	0.68428	1.03848e-05	3.29786e-05	26.0474	26.0155	26.0996	26.203	26.1973	26.1257	26.1553	26.0366	25.5033	25.5515	25.5793	25.528	25.5001	25.6248	25.6224	25.5923
2-Quinolinecarboxylate	18.3223	18.3223	16.9114	16.9114	-1.41085	0.37609	1.0963e-05	3.38986e-05	18.1947	18.4766	18.1459	18.1484	18.5348	18.3592	18.5816	18.1373	16.1152	17.3494	17.7401	17.6293	16.0598	17.4061	17.109	15.8826
4-Quinolinecarboxylate	18.3223	18.3223	16.9114	16.9114	-1.41085	0.37609	1.0963e-05	3.38986e-05	18.1947	18.4766	18.1459	18.1484	18.5348	18.3592	18.5816	18.1373	16.1152	17.3494	17.7401	17.6293	16.0598	17.4061	17.109	15.8826
3-Hydroxycarnitine (16:0)	16.72	16.72	14.9255	14.9255	-1.79447	0.288277	1.3375e-05	4.04188e-05	16.9077	17.8539	17.5821	17.591	16.299	16.4831	16.4439	14.599	14.599	15.599	14.599	16.2108	14.599	14.599	14.599	14.599
Hydroxy-FA (7:0)	22.3089	22.3089	23.0301	23.0301	0.721234	1.64859	1.34156e-05	4.04188e-05	22.2381	22.0916	22.4696	22.5214	22.3928	22.0938	22.5406	22.1234	23.6193	23.0486	22.743	22.8948	22.9237	22.7901	22.886	23.3356
Lyso-PC (18:0)	24.6919	24.6919	24.4005	24.4005	-0.291455	0.817078	1.65936e-05	4.87437e-05	24.8158	24.8534	24.6964	24.7419	24.75	24.7499	24.61	24.318	24.6734	24.4007	24.374	24.2495	24.356	24.4191	24.3398	24.3913
Platelet-activating factor	24.6919	24.6919	24.4005	24.4005	-0.291455	0.817078	1.65936e-05	4.87437e-05	24.8158	24.8534	24.6964	24.7419	24.75	24.7499	24.61	24.318	24.6734	24.4007	24.374	24.2495	24.356	24.4191	24.3398	24.3913
Acetylaminoadipate	19.688	19.688	19.1503	19.1503	-0.537738	0.68885	2.17996e-05	6.32458e-05	19.625	19.3843	19.576	19.7604	19.7863	19.7852	19.6564	19.9307	18.7153	19.3276	19.3718	18.6096	19.4865	19.2637	19.2053	19.2225
Adenosine monophosphate	20.9267	20.9267	21.7874	21.7874	0.860702	1.81592	2.39818e-05	6.87282e-05	20.9428	20.9738	21.0312	21.0332	21.1749	20.6941	20.8092	20.7543	20.5545	21.8015	21.8967	22.1611	21.928	22.1155	21.8199	22.0217
SM (d18:1/18:0)	24.0675	24.0675	24.499	24.499	0.431539	1.34867	4.11813e-05	0.000116598	24.3779	24.1645	24.0381	24.0535	24.1784	23.9509	23.9302	23.8465	24.5847	24.4034	24.4981	24.5185	24.5121	24.3577	24.6239	24.494
Salicylate	22.2074	22.2074	22.8691	22.8691	0.661674	1.58192	4.45515e-05	0.000124638	22.3516	21.9187	22.5318	22.2112	21.9161	22.0231	22.133	22.5734	22.7672	22.7431	22.4345	23.1084	22.7091	23.0273	22.8666	23.2962
Uridine monophosphate	16.6489	16.6489	17.7308	17.7308	1.08196	2.11692	4.80702e-05	0.0001329	16.1654	15.4891	16.3138	17.1196	17.3741	16.9202	16.4948	17.314	17.4201	17.6245	17.2913	17.8109	17.7505	18.0648	17.9931	17.8912
PS (40:6)	24.2558	24.2558	24.5356	24.5356	0.27976	1.21399	5.48214e-05	0.000149803	24.3456	24.438	24.2618	24.2946	24.3338	24.2164	24.051	24.1051	24.6155	24.3859	24.4821	24.5594	24.4972	24.5788	24.5385	24.6271
PC (34:1)	29.2254	29.2254	29.448	29.448	0.222559	1.1668	6.86591e-05	0.000185459	29.4287	29.3674	29.2575	29.2109	29.2788	29.1807	29.0347	29.0447	29.6063	29.3203	29.465	29.4469	29.4405	29.4448	29.4196	29.4407
S-Methylthioadenosine	18.8581	18.8581	17.2248	17.2248	-1.63325	0.322361	0.000118217	0.000315692	18.7045	19.2251	19.0128	19.1347	19.4887	18.8957	18.7723	17.6308	15.989	16.8694	17.564	17.822	17.4451	16.4218	18.0059	17.6813
SM (d18:1/16:0)	28.4827	28.4827	28.722	28.722	0.239338	1.18045	0.000125881	0.000332383	28.7182	28.6376	28.5204	28.464	28.5546	28.4451	28.2935	28.2278	28.809	28.6473	28.7181	28.6963	28.7038	28.7244	28.7302	28.7467
NADP+	18.7443	18.7443	16.5103	16.5103	-2.23403	0.212565	0.000138621	0.000361954	18.9337	18.6198	18.3394	18.6988	19.1876	18.4621	18.707	19.0059	16.3978	16.9322	17.5603	16.9496	15.168	15.8766	16.526	16.6716
Glu-Pro	19.0386	19.0386	17.6318	17.6318	-1.40679	0.37715	0.000177113	0.00045738	19.1155	18.8773	19.1017	19.1916	19.0976	19.1642	18.8943	18.8663	17.4369	18.432	18.2521	16.7525	17.2811	17.3468	17.7068	17.846
Ornithine	18.8606	18.8606	16.4661	16.4661	-2.39445	0.190195	0.000215093	0.000549423	18.401	19.2894	20.9357	19.4786	18.0853	18.5708	18.3664	17.7575	16.6096	18.3801	17.0578	17.0181	15.3279	15.206	15.2639	16.8658
Methacholine	19.7821	19.7821	19.3489	19.3489	-0.433221	0.740606	0.000229465	0.000575145	19.8012	19.7998	19.811	19.7755	19.9621	19.6982	19.6148	19.7944	19.3141	19.2956	19.4625	19.4315	19.2763	19.4426	19.4122	19.1566
PC (38:4)	26.9149	26.9149	27.0933	27.0933	0.178328	1.13157	0.000230058	0.000575145	27.0515	27.0397	26.9796	26.9119	26.9712	26.8466	26.7274	26.7915	27.1839	26.9633	27.1691	27.102	27.1126	27.1219	27.0486	27.0446
trans-Aconitate	20.1802	20.1802	19.6893	19.6893	-0.490897	0.711583	0.000248054	0.000613607	20.0564	19.805	20.2159	20.2078	20.2972	20.2315	20.2731	20.3548	19.6975	19.7364	19.4821	19.5539	19.5124	19.8379	19.8119	19.8826
PC (40:5)	24.3598	24.3598	24.5414	24.5414	0.181654	1.13418	0.000261366	0.000639802	24.392	24.4843	24.5359	24.3251	24.3647	24.3321	24.2038	24.2403	24.6517	24.4151	24.5847	24.5436	24.5827	24.5422	24.5353	24.4761
Azelate	19.8721	19.8721	21.2849	21.2849	1.41281	2.66255	0.00028684	0.000694922	19.3287	19.687	18.9351	19.7956	20.1098	19.4698	20.7215	20.9292	22.5006	22.5329	21.2957	20.9489	20.9377	20.4737	20.6223	20.9674
PC (36:4)	27.0189	27.0189	27.1882	27.1882	0.169284	1.1245	0.000303842	0.000728601	27.0698	27.133	27.055	27.0646	27.0196	27.0146	26.8134	26.9813	27.245	27.0535	27.2302	27.2369	27.1741	27.2267	27.1345	27.2047
Carnitine (18:0)	19.1027	19.1027	20.0857	20.0857	0.982992	1.97656	0.00032052	0.000753222	18.9779	19.5681	19.0467	19.2284	19.2104	19.5015	18.7137	18.5748	19.9145	20.0176	20.2829	19.8148	19.9415	19.9852	20.522	20.2068
N,N,N-Trimethyllysine	18.7658	18.7658	16.4373	16.4373	-2.32845	0.199098	0.000317981	0.000753222	18.622	18.5141	18.6715	18.8443	18.8275	18.6821	18.6834	19.2812	17.4321	17.3334	13.7851	17.6533	17.1215	17.5243	16.8638	13.7851
N-Acetylhexosamine phosphate	19.0875	19.0875	18.4175	18.4175	-0.670014	0.628501	0.000338976	0.000788707	19.0141	18.5036	19.0423	19.1664	19.2264	19.1311	19.2026	19.4136	18.3366	18.1165	18.4499	18.1171	18.5036	18.7577	18.6852	18.3734
Allantoin	15.8602	15.8602	14.5208	14.5208	-1.33945	0.395173	0.000401763	0.00092563	14.2968	15.8425	15.8709	16.0303	15.2968	16.4791	17.0827	15.9827	14.2968	14.2968	14.2968	14.2968	14.2968	14.2968	14.2968	16.0885
PC (36:2)	28.6466	28.6466	28.8338	28.8338	0.187191	1.13854	0.000411007	0.000937734	28.8394	28.7813	28.6848	28.6478	28.6964	28.6281	28.441	28.4541	28.9846	28.6943	28.8687	28.8513	28.8346	28.8128	28.8031	28.8209
PE (40:7)	22.9354	22.9354	23.2808	23.2808	0.345381	1.27049	0.000485659	0.0010974	22.8657	22.8468	22.6665	23.0232	22.8909	23.078	22.8041	23.3084	23.5661	23.023	23.3134	23.392	23.2245	23.1621	23.279	23.2864
Glucose 6-phosphate	18.4471	18.4471	17.0406	17.0406	-1.40651	0.377224	0.00051219	0.00114633	18.106	17.7848	18.3798	18.7836	18.3611	18.2944	18.726	19.1409	17.9067	15.0489	17.4431	16.9794	16.8604	17.4507	17.0841	17.5512
Trigonelline	19.4193	19.4193	18.6054	18.6054	-0.813973	0.568813	0.000726111	0.00160977	19.341	19.4379	19.0466	19.7583	19.7913	19.523	18.9057	19.551	17.9057	17.9057	19.2165	19.182	19.4287	17.9057	17.9057	19.3931
PI (32:0)	18.8044	18.8044	19.4675	19.4675	0.663073	1.58345	0.00080326	0.00176417	19.3504	19.3994	18.3727	19.2821	18.2057	18.7294	18.5688	18.5266	19.6501	19.352	19.5478	19.2613	19.3696	19.6077	19.4633	19.4879
S-Adenosylhomocysteine	15.9297	15.9297	14.404	14.404	-1.52564	0.347326	0.000932138	0.00202826	16.7404	16.9194	14.404	14.404	15.404	17.5358	17.6256	14.404	14.404	14.404	14.404	14.404	14.404	14.404	14.404	14.404
Guanosine monophosphate	13.6621	13.6621	15.7198	15.7198	2.05773	4.16331	0.00102244	0.00220434	12.4508	12.4508	13.4508	15.3455	14.2813	15.0588	12.4508	13.8082	12.4508	15.1436	16.7727	16.4581	16.8056	17.2816	15.0532	15.7933
PC (38:5)	27.068	27.068	27.2213	27.2213	0.153257	1.11208	0.00114148	0.00243862	27.1276	27.1711	27.1195	27.1166	27.1169	27.0733	26.9328	26.8864	27.2733	27.0751	27.2868	27.2449	27.2292	27.2576	27.1683	27.235
Tryptophan	18.5703	18.5703	18.1176	18.1176	-0.45276	0.730644	0.00116005	0.00245597	18.7301	18.793	18.8217	18.5368	18.4055	18.4421	18.5401	18.2933	18.5238	18.6559	18.1161	17.4962	18.0008	18.1805	17.7518	18.2153
Carnitine	22.4754	22.4754	22.1564	22.1564	-0.319009	0.80162	0.00124922	0.00262112	22.4132	22.3573	22.404	22.6616	22.5143	22.486	22.5411	22.426	22.1789	22.2496	21.9545	22.1695	22.1234	22.2137	22.2276	22.1343
FA (16:0)	29.2829	29.2829	30.1299	30.1299	0.847034	1.7988	0.00143205	0.00297815	31.8281	29.3249	28.8194	29.2139	28.9635	28.8752	28.7549	28.4829	31.2705	30.4028	30.1361	29.9821	30.0121	29.755	29.9683	29.5121
Lactate	28.2832	28.2832	29.1118	29.1118	0.828564	1.77592	0.00153853	0.00317154	28.6201	27.5445	28.9067	27.6322	28.525	28.4287	27.6572	28.9513	29.1358	29.3436	28.7774	29.3669	29.268	28.9918	28.3126	29.6981
PC (36:5)	25.5324	25.5324	25.674	25.674	0.141551	1.10309	0.00160304	0.00327579	25.5739	25.5816	25.4894	25.5316	25.5918	25.5472	25.3545	25.5893	25.6554	25.503	25.6973	25.7489	25.6698	25.7348	25.6958	25.6869
Lysine	18.7663	18.7663	17.3596	17.3596	-1.40667	0.377181	0.00167085	0.00338491	18.8874	19.1206	18.8044	18.9359	19.1506	18.8826	18.5631	17.7855	18.617	18.4553	16.736	16.736	16.736	16.736	16.736	18.1243
PE (36:3)	23.1884	23.1884	23.4807	23.4807	0.29232	1.22461	0.0017558	0.0035266	23.2478	23.1712	23.1721	23.032	23.0354	23.3108	23.1413	23.3964	23.5951	23.1132	23.5684	23.5129	23.693	23.3041	23.6587	23.4002
Malate	24.0839	24.0839	23.69	23.69	-0.393924	0.761057	0.00197339	0.00393006	23.9831	23.9162	23.9185	24.2314	24.0563	24.0543	24.0824	24.4289	23.3858	23.5975	23.8921	23.7755	23.8047	23.7215	23.6987	23.6439
FA (20:0)	22.5567	22.5567	23.3845	23.3845	0.827799	1.77498	0.00202629	0.00400149	24.5121	22.6174	22.1202	22.6827	22.4139	22.1421	22.1675	21.7981	24.917	23.6517	23.2583	23.468	23.0772	22.879	22.9804	22.8448
Carnitinamide	21.1355	21.1355	20.294	20.294	-0.841433	0.558089	0.00204881	0.00401226	21.0791	20.882	21.0433	21.183	21.3039	21.273	21.1358	21.1837	20.3512	20.2161	20.3163	20.1476	20.2534	20.4534	20.4111	20.2033
Glu-Glu	13.7806	13.7806	12.6806	12.6806	-1.09999	0.466521	0.00208216	0.00404387	13.441	12.441	15.4974	14.4311	13.8985	14.6412	13.4532	12.441	12.441	12.441	12.441	12.441	14.3574	12.441	12.441	12.441
FA (16:1)	24.3677	24.3677	25.7758	25.7758	1.40808	2.65384	0.00238832	0.00460045	24.4652	23.5059	24.7581	24.4898	24.4407	24.2125	24.1245	24.9447	28.3294	25.693	24.4804	25.7613	25.0211	24.8861	26.1175	25.9172
PC (32:1)	28.9175	28.9175	29.0629	29.0629	0.145409	1.10604	0.00245341	0.00468741	29.0663	29.0451	28.9755	28.9216	28.9675	28.9016	28.7434	28.719	29.1519	28.9386	29.1229	29.0701	29.0544	29.0773	29.0406	29.0475
Creatinine	23.3553	23.3553	22.9628	22.9628	-0.392404	0.761859	0.00301214	0.00570849	23.3269	23.4685	23.4206	23.3664	23.4714	23.4537	23.3935	22.941	22.3682	23.2329	22.7488	22.9597	23.1915	22.7738	23.1736	23.2543
PC (34:2)	28.2564	28.2564	28.3954	28.3954	0.138965	1.10111	0.00341636	0.00642276	28.4145	28.3849	28.2931	28.278	28.2616	28.2477	28.0764	28.0949	28.467	28.2665	28.4537	28.4139	28.3703	28.4144	28.3899	28.3871
Phosphoethanolamine	23.797	23.797	23.2082	23.2082	-0.588794	0.664898	0.00374504	0.0069848	23.6561	23.3849	23.6533	23.8961	23.8655	23.9326	23.8968	24.0907	23.0874	22.932	23.2029	23.1702	23.1389	23.4605	23.3074	23.3664
CMP-2-aminoethylphosphonate	17.2101	17.2101	15.4698	15.4698	-1.74027	0.299314	0.00389316	0.00720389	16.9195	16.5153	17.3831	17.389	17.1653	17.3468	17.1765	17.7853	14.3953	13.8044	16.5785	16.9271	15.8152	16.026	15.1514	15.0608
Lyso-PC (18:2)	16.1729	16.1729	14.9296	14.9296	-1.24333	0.422396	0.00458037	0.00840928	16.7646	17.6128	16.5632	15.3741	15.3002	16.1625	17.3058	14.3002	15.7852	15.4489	14.3002	14.3002	14.3002	14.3002	16.7016	14.3002
Indole	24.5654	24.5654	25.2508	25.2508	0.685352	1.60809	0.00552635	0.0100674	24.4765	24.0412	24.2441	26.1571	24.6919	24.3114	24.3346	24.2664	25.3523	25.1756	24.8283	25.4684	24.8968	25.1314	25.224	25.9293
NADPH	17.1123	17.1123	16.2283	16.2283	-0.884011	0.541859	0.00600056	0.0108472	16.9001	15.0653	16.9282	17.3316	17.3731	17.8443	17.5252	17.9304	14.5272	15.3666	15.9778	16.7632	16.5811	17.554	16.6242	16.4321
Ophthalmate	19.9749	19.9749	19.26	19.26	-0.714874	0.609258	0.00653218	0.011718	19.7926	19.6789	19.9095	20.0111	20.1146	20.2795	20.0917	19.9212	18.9391	19.0063	19.0627	19.3663	19.3106	19.5749	19.2309	19.5892
PC (40:6)	25.6725	25.6725	25.7936	25.7936	0.121094	1.08756	0.00801825	0.0142749	25.7802	25.8109	25.7136	25.6584	25.6939	25.6727	25.4784	25.5719	25.801	25.6595	25.8658	25.8234	25.8415	25.8648	25.7359	25.7568
Indole-3-acrylate	18.891	18.891	18.2471	18.2471	-0.643927	0.639969	0.00843456	0.0149032	18.7929	18.9876	19.0015	18.8553	19.2361	18.6909	19.0042	18.5598	17.8368	18.4822	18.1267	18.1325	18.2388	18.2237	18.5708	18.3654
Inosine monophosphate	17.736	17.736	18.9767	18.9767	1.24069	2.36312	0.00857411	0.0150367	17.7118	18.019	17.9782	16.9583	17.0808	17.9489	17.1502	19.0408	17.3606	18.1967	19.4578	19.2918	19.2619	19.9363	19.592	18.7165
3-Hydroxycarnitine (5:0)	16.5592	16.5592	15.781	15.781	-0.778186	0.583099	0.00930225	0.0161928	17.0721	16.3226	16.1308	17.0526	17.2433	16.4572	16.284	15.9108	14.9108	14.9108	16.6047	14.9108	17.3139	16.1304	16.5555	14.9108
Leu-Pro	18.5509	18.5509	17.9036	17.9036	-0.647317	0.638467	0.00959973	0.0165878	18.5668	18.5951	18.1578	18.5074	18.7914	18.7657	18.6663	18.357	18.0693	17.56	18.443	18.0609	18.0426	18.4155	17.7429	16.8947
Leu-Leu	20.5951	20.5951	21.481	21.481	0.885859	1.84786	0.0098859	0.0169576	20.0767	21.9648	20.0413	21.0329	20.7815	20.3828	21.4394	19.0413	20.9549	21.1507	22.1551	21.3461	22.0725	21.4775	21.8146	20.8763
PC (32:2)	25.8515	25.8515	25.9754	25.9754	0.123964	1.08972	0.011057	0.0188289	25.9629	25.9473	25.8868	25.8515	25.8882	25.8403	25.695	25.7397	25.993	25.8644	26.0489	25.9707	25.9966	26.0055	25.9395	25.9848
Adenosine diphosphate	22.8427	22.8427	23.0927	23.0927	0.250076	1.18927	0.0120609	0.0203907	22.6515	22.4447	22.8268	22.8302	22.8978	22.9186	22.7869	23.3849	22.6836	22.8474	22.9804	23.1078	23.1587	23.3673	23.2481	23.3486
FA (18:0)	28.2846	28.2846	28.9835	28.9835	0.698888	1.62325	0.0134343	0.0225505	31.0525	28.3187	27.93	28.2479	27.785	27.7623	27.6919	27.4883	30.2616	29.2395	28.9218	28.9501	28.8497	28.5264	28.7564	28.3622
FA (18:1)	24.8945	24.8945	25.7271	25.7271	0.832594	1.78088	0.0137821	0.0229701	27.0009	24.5069	24.4959	25.0687	24.9675	24.2486	24.3467	24.5205	28.1132	25.6882	25.1628	25.4445	25.3287	25.2508	25.4658	25.3624
Cytidine diphosphate	16.7885	16.7885	15.9374	15.9374	-0.851102	0.554361	0.0169966	0.0280562	16.1296	14.9759	17.162	16.4432	17.3833	17.0947	17.4863	17.6328	13.9759	15.1209	15.89	16.51	15.1339	16.9959	17.0591	16.8134
Myoinositol	26.0193	26.0193	25.818	25.818	-0.201354	0.869734	0.0170725	0.0280562	25.9133	25.8601	25.942	26.1171	25.9339	26.0926	26.0291	26.2665	25.9514	25.7448	25.8438	25.7677	25.8013	26.017	25.7711	25.6468
Malonate	20.9431	20.9431	21.3464	21.3464	0.403264	1.3225	0.0221102	0.0360826	21.0204	20.8083	20.6995	20.4269	20.8953	21.0122	21.4579	21.2243	21.3062	22.032	21.6125	21.0106	21.3066	21.2907	20.8408	21.3717
Lyso-PC (17:0)	20.1169	20.1169	19.4522	19.4522	-0.664647	0.630843	0.0243965	0.0395391	20.4168	20.3347	19.9959	20.1121	20.1828	20.3108	19.9132	19.6685	19.9004	19.4816	19.5734	19.5717	19.2677	19.4563	18.5954	19.7712
Pantothenate	19.4595	19.4595	19.0219	19.0219	-0.437662	0.73833	0.0273078	0.0439543	19.3963	19.6826	19.2423	19.1973	19.5598	19.6482	19.8217	19.1281	19.1111	18.8564	18.9571	19.1397	18.9734	19.0676	19.0675	19.0021
Hypoxanthine	20.8656	20.8656	19.9332	19.9332	-0.932466	0.523962	0.028219	0.045112	20.4572	20.8366	20.9682	21.2184	20.9236	20.8096	21.0627	20.6486	18.6942	19.1844	20.083	20.1573	20.4635	20.081	20.1299	20.672
Creatine	27.3076	27.3076	27.0258	27.0258	-0.281755	0.82259	0.0325717	0.0513715	27.0153	27.1873	27.1842	27.3547	27.234	27.1955	27.1172	28.1722	26.8288	26.9371	27.1584	27.0599	27.0296	27.0947	27.0259	27.0718
Glyceraldehyde 3-phosphate	20.0428	20.0428	19.3971	19.3971	-0.645626	0.639215	0.0325377	0.0513715	19.7113	19.6335	19.9498	20.1656	20.1392	20.2522	20.27	20.2204	19.0848	18.9317	19.242	19.4501	19.5741	19.6816	19.5953	19.6174
Methyl vanillate	18.2645	18.2645	19.3701	19.3701	1.10567	2.15198	0.0365991	0.0573385	18.5068	19.7483	18.3119	15.3678	17.6853	18.393	19.6344	18.4681	19.6517	19.1909	20.205	18.742	20.1903	19.8337	19.7375	17.41
Mevalolactone	24.3266	24.3266	24.0919	24.0919	-0.234686	0.84987	0.0374145	0.0582279	24.2586	24.1405	24.4447	24.4156	24.5619	24.4817	24.0992	24.2104	24.6638	24.0396	23.9727	24.0759	24.2202	23.9004	23.7965	24.066
FA (12:0)	25.3849	25.3849	26.2348	26.2348	0.849948	1.80244	0.0392421	0.0606704	25.411	24.7982	26.048	24.4827	24.658	26.7264	25.1922	25.7628	26.6041	25.8621	25.347	26.5742	25.6488	26.4993	25.9316	27.4117
5-Aminolevulinate	24.6605	24.6605	24.2497	24.2497	-0.410867	0.752171	0.0401303	0.0612378	24.2212	24.6506	24.5184	24.5642	24.5331	24.5004	24.3238	25.9726	24.1741	24.1444	24.3327	24.2425	24.1432	24.3614	24.2708	24.328
cis-4-Hydroxyproline	24.6605	24.6605	24.2497	24.2497	-0.410867	0.752171	0.0401303	0.0612378	24.2212	24.6506	24.5184	24.5642	24.5331	24.5004	24.3238	25.9726	24.1741	24.1444	24.3327	24.2425	24.1432	24.3614	24.2708	24.328
Glutathione disulfide	20.9424	20.9424	20.7396	20.7396	-0.202872	0.868819	0.043101	0.0653466	20.7837	20.9316	20.9058	21.0826	20.9353	20.7685	20.9413	21.1906	20.9248	20.8469	20.7803	20.7931	20.6789	20.7996	20.5772	20.5157
Phenylalanine	22.2325	22.2325	21.977	21.977	-0.255487	0.837704	0.0456579	0.0687795	22.2204	22.0617	22.503	22.22	22.2443	22.2457	22.2026	22.162	22.2864	22.3403	21.7328	21.802	21.8931	21.9306	22.0209	21.8096
trans-4-Hydroxyproline	24.7086	24.7086	24.3361	24.3361	-0.372556	0.772413	0.0508241	0.0760743	24.2565	24.7158	24.557	24.6252	24.5694	24.5488	24.4005	25.996	24.1741	24.2591	24.437	24.3382	24.2848	24.4052	24.395	24.3953
Suberate	19.0223	19.0223	20.1427	20.1427	1.12037	2.17403	0.053846	0.0800875	18.4019	18.4019	19.5643	18.4019	18.4019	19.4101	19.4019	20.1942	18.4019	23.0964	20.1245	20.6274	20.2037	18.4019	20.3323	19.9531
Adenosine diphosphate ribose	12.6578	12.6578	13.2832	13.2832	0.625411	1.54265	0.0641924	0.0938091	12.5328	12.5328	12.5328	12.5328	12.5328	13.5328	12.5328	12.5328	15.4295	13.9444	12.5328	12.5328	12.5328	14.2278	12.5328	12.5328
Dethiobiotin	18.1963	18.1963	18.909	18.909	0.712754	1.63893	0.0636364	0.0938091	17.7255	19.3033	17.7184	18.8963	17.8253	17.9729	19.0632	17.0655	16.9216	19.3195	19.5663	18.1471	19.4549	19.407	20.2607	18.1952
Hexosamines	15.5029	15.5029	16.5727	16.5727	1.06984	2.0992	0.0646684	0.0938091	14.5862	16.3644	15.3967	15.838	16.896	15.3925	13.5862	15.9629	16.7306	15.8929	17.2203	16.9341	17.5178	13.5862	17.947	16.7527
Succinate	21.253	21.253	21.6467	21.6467	0.393706	1.31376	0.0645886	0.0938091	20.7046	20.9118	21.7506	21.3646	21.2514	21.1553	21.7098	21.1756	21.412	22.0964	22.1113	21.7235	21.3425	21.1119	21.2404	22.1353
Cys-Gly	15.7582	15.7582	15.0746	15.0746	-0.683532	0.622639	0.0657782	0.0944107	16.3734	16.1719	15.0926	15.2644	15.6731	15.5532	15.5357	16.4011	16.0078	14.0926	14.0926	16.1686	15.431	14.0926	15.5985	15.1133
Sulfolactate	21.3933	21.3933	22.2281	22.2281	0.834838	1.78366	0.0658866	0.0944107	22.7112	19.5261	22.2834	20.6688	21.5448	22.0989	20.1094	22.2036	22.8044	22.3725	22.2231	22.9924	22.6553	21.848	20.3766	22.5526
1-Methylhistidine	18.8688	18.8688	18.3197	18.3197	-0.549155	0.68342	0.0733009	0.103769	18.7783	18.3859	19.1343	18.4905	19.0464	19.0838	19.1348	18.8965	16.9532	18.4534	18.8338	17.9532	18.5676	19.2031	18.3317	18.2613
5,6 Dimethylbenzimidazole	18.7406	18.7406	19.4784	19.4784	0.737843	1.66768	0.072894	0.103769	18.3193	18.265	19.0256	18.2979	18.5962	18.8677	19.5052	19.048	16.7633	19.8664	19.969	18.6179	19.6258	21.0413	19.9271	20.0169
Carnitine (14:0)	20.721	20.721	20.1476	20.1476	-0.573413	0.672025	0.0738624	0.103938	20.6065	20.848	20.6046	20.9178	20.915	20.9141	20.8513	20.1104	20.4252	19.7349	20.1987	20.363	20.2951	20.0864	20.0065	20.0706
Oxohexanoic acid	24.2842	24.2842	24.024	24.024	-0.260155	0.834998	0.076701	0.10729	24.2556	24.1136	24.3243	24.3777	24.5568	24.4179	24.0742	24.1533	24.5979	23.9359	23.9175	24.0616	24.1701	23.6684	23.7905	24.0502
Ureidosuccinate	13.8967	13.8967	12.7194	12.7194	-1.17734	0.442165	0.0838395	0.116582	13.8985	12.5013	12.5013	15.7218	14.4441	12.5013	13.5013	16.104	12.5013	12.5013	12.5013	14.2459	12.5013	12.5013	12.5013	12.5013
Glycerol cyclic phosphate	15.7892	15.7892	16.3828	16.3828	0.593579	1.50899	0.0865496	0.119642	16.6034	16.9515	15.3865	14.7874	15.646	15.3193	15.0356	16.5841	17.1491	16.6274	15.186	16.064	16.4587	16.0938	16.7929	16.6904
N-Formylmethionine	12.4159	12.4159	11.4891	11.4891	-0.926831	0.526013	0.0904645	0.124323	11.4891	11.4891	11.4891	13.4245	14.7351	12.7223	12.4891	11.4891	11.4891	11.4891	11.4891	11.4891	11.4891	11.4891	11.4891	11.4891
Hydroxy-FA (12:0)	21.0481	21.0481	21.4598	21.4598	0.411698	1.33025	0.103544	0.141471	21.2161	20.7039	21.5108	21.4834	20.9407	21.2533	20.7361	20.5403	22.0809	21.1964	20.7579	22.0137	20.3746	21.6368	21.4001	22.2177
Tyrosine	20.2584	20.2584	19.8128	19.8128	-0.445563	0.734298	0.10428	0.141652	20.0621	20.3485	20.2365	20.2885	20.4633	20.3871	20.2002	20.0808	19.6505	19.8206	19.676	19.8142	19.7278	19.9087	20.0683	19.8363
Quinolinate	15.31	15.31	14.4278	14.4278	-0.882192	0.542542	0.104915	0.141696	14.8344	14.9811	15.8604	15.2243	13.8344	14.9522	15.7215	17.0717	13.8344	13.8344	13.8344	16.5319	13.8344	13.8344	15.884	13.8344
SM (d18:1/22:0)	23.248	23.248	24.0607	24.0607	0.812675	1.75646	0.10935	0.146841	23.4506	23.2477	23.2439	23.1308	23.2584	23.3685	23.0502	23.2341	24.2821	23.8956	24.0557	24.0035	24.0598	23.9102	24.1273	24.1514
Alanine	21.4792	21.4792	21.6784	21.6784	0.199188	1.14805	0.115334	0.153998	21.3088	21.5378	21.7991	21.6854	21.7236	21.246	21.1128	21.4199	21.1535	21.8124	21.8937	21.7131	21.69	22.0073	21.7195	21.4373
Fructose 6-phosphate	22.0753	22.0753	21.7509	21.7509	-0.324422	0.798618	0.132199	0.174532	21.846	21.7482	21.8846	22.0416	22.2224	22.1044	22.2422	22.5128	21.3043	21.5324	21.7954	21.8625	21.8034	21.9628	21.8047	21.9414
Galactose 1-phosphate	22.0753	22.0753	21.7509	21.7509	-0.324422	0.798618	0.132199	0.174532	21.846	21.7482	21.8846	22.0416	22.2224	22.1044	22.2422	22.5128	21.3043	21.5324	21.7954	21.8625	21.8034	21.9628	21.8047	21.9414
PS (40:7)	19.0731	19.0731	18.7552	18.7552	-0.317847	0.802266	0.145976	0.191615	19.058	19.6224	19.0665	19.3892	19.114	18.9796	18.7504	18.6045	19.6552	18.021	18.4436	19.5498	18.9084	17.9342	18.8433	18.6864
SM (d18:1/14:0)	23.8574	23.8574	23.949	23.949	0.0915789	1.06554	0.146769	0.191615	24.1039	24.0204	23.8752	23.8695	23.9301	23.8493	23.6748	23.5364	24.0575	23.8965	23.9584	23.9138	23.982	23.9889	23.8683	23.9267
Carnitine (18:1)	20.9964	20.9964	20.5135	20.5135	-0.482919	0.715528	0.148466	0.19276	21.0444	20.9663	20.8851	21.1095	21.2675	21.049	20.8777	20.7717	20.8664	20.3933	20.8754	20.354	19.7582	20.4235	20.6315	20.8055
Itaconate	21.2254	21.2254	21.8259	21.8259	0.600501	1.51624	0.14988	0.193527	21.8463	21.4859	21.2897	21.3447	21.5226	21.1322	21.6282	19.5537	22.4537	21.8475	21.6372	21.5701	21.4645	21.7738	21.5264	22.3341
Carnitine (17:0)	15.4909	15.4909	16.0539	16.0539	0.563029	1.47737	0.159154	0.204379	14.7191	14.7191	14.7191	16.1269	17.02	16.13	14.7191	15.7735	16.1882	17.2545	14.7191	17.049	16.7999	16.9821	14.7191	14.7191
SM (d18:1/18:1)	21.1953	21.1953	20.9385	20.9385	-0.256799	0.836943	0.162707	0.207805	21.3625	21.271	21.2141	21.2751	21.1495	21.2925	20.932	21.0655	21.1129	20.7616	20.615	21.1824	21.2589	21.0774	20.9112	20.5885
Hexitols	17.7884	17.7884	17.234	17.234	-0.554424	0.680929	0.166564	0.211582	17.66	17.8864	17.6095	17.6935	17.7559	17.6643	17.8378	18.2001	16.3869	19.0369	17.46	18.4982	16.8491	16.8255	16.3386	16.4768
Uridine	14.0114	14.0114	14.8984	14.8984	0.886985	1.84931	0.172502	0.217946	13.4404	13.4404	14.8651	13.4404	13.4404	15.5835	14.4404	13.4404	13.4404	13.4404	13.4404	15.3601	16.5704	13.4404	16.8289	16.6659
Cytidine monophosphate	13.2108	13.2108	14.2424	14.2424	1.03155	2.04421	0.188039	0.236306	13.6279	13.9663	14.6271	12.2277	13.2277	13.5549	12.2277	12.2277	12.2277	12.2277	12.2277	14.2966	16.2097	16.2219	14.2766	16.2513
PC (40:8)	23.014	23.014	23.1022	23.1022	0.0882064	1.06305	0.197328	0.24666	22.7935	23.1163	22.7898	23.1127	23.0165	22.9769	22.9877	23.3183	23.1986	22.8607	23.0545	23.066	23.3528	22.9381	23.1189	23.2277
Carnitine (3:0)	22.2785	22.2785	22.5192	22.5192	0.2407	1.18157	0.218366	0.271514	22.2097	22.319	22.2557	22.3974	22.392	22.3413	22.3256	21.9875	22.2262	22.3984	22.5487	22.5663	22.6065	22.5714	22.7012	22.5351
Glutathione	23.6577	23.6577	23.7272	23.7272	0.0694248	1.0493	0.220224	0.272382	23.5572	23.4806	23.6098	23.7795	23.8077	23.6554	23.6197	23.752	23.5621	23.7008	23.8308	23.7871	23.6449	23.9081	23.6514	23.732
4-Pyridoxate	16.5843	16.5843	17.3654	17.3654	0.781098	1.71844	0.239446	0.294606	17.3726	16.0288	16.1989	16.6117	16.6506	17.0662	16.8459	15.8993	18.1757	17.127	18.4361	18.0875	17.4211	14.8993	16.8399	17.9363
4-Guanidinobutanoate	20.4955	20.4955	20.6822	20.6822	0.186625	1.1381	0.249085	0.3047	20.3171	20.1892	20.2112	20.5692	20.3786	20.5881	20.5337	21.1774	20.5972	21.7317	20.7031	20.7782	20.3322	20.5737	20.4783	20.2628
Lyso-PE (18:0)	20.6421	20.6421	20.7064	20.7064	0.0643085	1.04558	0.250243	0.3047	20.7625	20.7179	20.642	20.6252	20.595	20.7192	20.5656	20.5093	20.8959	20.5439	20.7907	20.8344	20.5642	20.6993	20.6543	20.6684
PE (38:6)	22.4447	22.4447	22.5448	22.5448	0.100105	1.07185	0.263891	0.319662	22.4549	22.6043	22.16	22.5685	22.3263	22.3394	22.2736	22.8304	22.6754	22.3103	22.6996	22.792	22.6647	22.5379	22.4703	22.2082
Lyso-PE (16:0)	16.0674	16.0674	15.3431	15.3431	-0.724243	0.605314	0.267371	0.322216	16.9284	16.6781	16.8361	15.838	14.3746	16.524	16.9849	14.3746	17.3436	16.4829	14.3746	14.3746	14.3746	14.3746	17.0452	14.3746
Gamma-aminobutyrate	24.464	24.464	24.5906	24.5906	0.126625	1.09174	0.270481	0.324301	24.1848	24.3928	24.4645	24.534	24.6381	24.5069	24.5533	24.4375	23.8517	24.6504	24.654	24.6821	24.6872	24.8122	24.8038	24.5834
Carnitine (4:0)	19.5248	19.5248	19.2346	19.2346	-0.290172	0.817805	0.275392	0.328513	19.3128	19.4808	19.4683	19.6067	19.5576	19.7136	19.912	19.1466	19.3474	19.5471	19.0012	18.6608	19.6912	18.5999	19.2755	19.7539
Adenosine	18.3674	18.3674	17.569	17.569	-0.798463	0.574961	0.28568	0.337361	15.0709	19.1064	19.2093	16.643	17.9837	20.0518	20.1087	18.7657	14.59	13.59	16.0601	16.8058	20.3582	17.8588	20.5292	20.7598
Ribulose/Ribose/Xylulose 5-phosphate	13.1062	13.1062	13.9429	13.9429	0.836769	1.78605	0.284909	0.337361	14.8075	14.7084	13.3442	12.1978	13.1978	12.1978	12.1978	12.1978	12.1978	12.1978	16.0378	12.1978	15.0015	14.4199	14.6005	14.8903
PS (38:5)	20.1765	20.1765	20.3105	20.3105	0.133992	1.09733	0.293857	0.345282	20.3539	20.6248	20.2198	20.1412	20.5991	19.9723	20.1447	19.3562	20.7329	20.1368	20.2736	20.6051	20.1405	19.9753	20.4	20.2197
PE (32:0)	22.5175	22.5175	22.7056	22.7056	0.188105	1.13927	0.299721	0.35042	22.7258	22.546	22.5745	22.5887	22.5371	22.3815	22.4973	22.2893	22.7226	22.5512	22.8358	22.8106	22.636	22.709	22.7196	22.6602
PC (40:4)	22.1541	22.1541	22.2403	22.2403	0.086242	1.0616	0.30671	0.356816	22.5039	22.1433	22.4321	21.8322	22.3128	22.1371	21.9223	21.949	22.4233	22.2681	22.1503	22.1424	22.1924	22.6053	22.0239	22.1168
2-/3-Phosphoglycerate	15.5448	15.5448	15.0419	15.0419	-0.502954	0.70566	0.321086	0.371701	14.5345	14.5914	15.7005	16.2327	16.07	16.0845	15.7965	15.3486	12.7992	14.311	14.0861	14.8262	15.6056	16.3955	16.1319	16.1796
Thiamine monophosphate	13.8309	13.8309	13.5821	13.5821	-0.248877	0.841551	0.323347	0.372483	14.378	13.378	13.378	13.378	13.378	13.378	14.4958	14.8839	13.378	13.378	13.378	15.0107	13.378	13.378	13.378	13.378
Citrulline	18.0971	18.0971	17.7677	17.7677	-0.329428	0.795852	0.329553	0.37778	17.908	18.5375	17.7477	18.3027	17.8173	18.0831	18.3714	18.0092	17.1194	18.9046	16.3989	18.3962	17.2154	17.6946	18.1587	18.2537
N-Undecanoylglycine	22.3956	22.3956	23.0011	23.0011	0.605509	1.52152	0.334918	0.382066	24.98	21.725	21.7533	21.7775	20.8219	22.846	23.5087	21.7524	22.6281	25.5337	21.8735	23.0071	22.6835	22.6803	23.145	22.4575
3-Hydroxycarnitine (6:0)	18.8059	18.8059	18.7063	18.7063	-0.0996354	0.933269	0.346004	0.392807	18.5712	18.6829	18.8334	18.7139	19.0542	18.927	18.938	18.7268	18.2223	18.876	18.7866	18.8016	18.7941	18.7261	18.7171	18.7265
PS (38:6)	16.6808	16.6808	16.1122	16.1122	-0.568597	0.674272	0.369679	0.417666	17.915	16.9151	17.2384	16.678	16.5279	14.5779	16.3719	17.2219	16.2283	17.247	14.5779	17.5868	16.4979	14.5779	14.5779	17.6038
Cortisol 21-acetate	15.8931	15.8931	16.4192	16.4192	0.526106	1.44004	0.390992	0.439632	15.4047	17.2043	16.5123	15.4047	15.4047	15.4047	16.4047	15.4047	15.4047	18.0533	17.1468	15.4047	17.123	15.4047	15.4047	17.4116
2-Hydroxybutyrate	18.894	18.894	19.1924	19.1924	0.298357	1.22974	0.411496	0.460484	19.3606	18.34	19.0556	18.6926	18.5389	18.9652	19.3397	18.8597	19.5104	19.824	19.8689	18.9263	19.3895	19.1596	17.34	19.5207
Urocanate	19.4958	19.4958	18.7889	18.7889	-0.706917	0.612628	0.423573	0.471752	17.6114	21.3697	23.6991	21.2619	16.6114	19.7203	17.8387	17.8542	19.3503	21.7309	16.6114	19.339	18.2907	16.6114	18.5706	19.807
Fumarate	20.9145	20.9145	20.6948	20.6948	-0.219741	0.85872	0.468135	0.518923	21.2743	21.1181	20.4924	21.351	20.6973	20.8733	20.2429	21.2669	19.2429	21.0041	21.0745	20.4204	21.2201	21.0293	21.2784	20.2884
Theanine	15.1609	15.1609	14.8111	14.8111	-0.349829	0.784677	0.538718	0.59436	14.9405	16.5318	13.9405	16.2331	15.7443	13.9405	16.0163	13.9405	13.9405	13.9405	16.0764	15.8914	13.9405	16.8186	13.9405	13.9405
2-Hydroxyglutarate	21.6212	21.6212	21.7262	21.7262	0.104973	1.07547	0.552734	0.606974	21.6083	21.5976	21.3038	21.6079	21.525	21.6967	21.8344	21.7958	21.499	21.6877	21.8465	21.8029	21.4654	22.3007	21.8224	21.3847
Choline	25.7071	25.7071	25.6023	25.6023	-0.104813	0.929926	0.596191	0.651651	26.071	26.0498	26.0453	24.8484	26.154	25.7521	25.8533	24.8831	25.8691	25.8775	24.9764	25.6998	25.4604	25.904	25.462	25.5692
PS (34:2)	20.6584	20.6584	20.7409	20.7409	0.0825063	1.05886	0.6102	0.663875	21.0431	20.8271	20.6661	20.7127	20.8815	20.5977	20.6031	19.9357	20.8642	20.913	20.851	20.6519	20.4334	21.0173	20.5033	20.693
Xanthine	15.0242	15.0242	14.6193	14.6193	-0.404858	0.755311	0.629288	0.681487	12.2977	15.2542	17.2628	15.1277	13.2977	15.3439	16.5809	15.0284	12.2977	16.1554	12.2977	15.0164	15.5974	12.2977	16.239	17.053
Glucuronolactone	12.2751	12.2751	11.9971	11.9971	-0.277996	0.824736	0.640799	0.69077	11.5853	12.8169	11.5853	12.6771	12.5853	11.5853	13.7805	11.5853	11.5853	14.8799	11.5853	11.5853	11.5853	11.5853	11.5853	11.5853
Lyso-PE (18:1)	18.6119	18.6119	18.7118	18.7118	0.0999303	1.07172	0.652734	0.700422	18.4548	18.644	18.5677	18.6134	18.749	18.8651	19.0123	17.9889	18.7902	19.2472	18.7306	18.6955	18.6335	18.5515	18.6401	18.4058
FA (20:2)	16.4506	16.4506	16.8101	16.8101	0.359593	1.28306	0.700888	0.745288	14.6564	18.4109	15.6564	17.4083	18.5661	15.8752	14.6564	16.3748	21.7971	14.6564	16.911	16.8382	17.9056	14.6564	14.6564	17.0601
Lyso-PE (20:4)	18.0258	18.0258	18.1899	18.1899	0.164121	1.12048	0.699326	0.745288	18.4396	18.0657	18.0909	18.0899	18.0831	18.2977	17.451	17.6884	18.9924	18.212	17.0184	18.3322	17.9872	18.0686	18.4867	18.4217
Citramalate	21.766	21.766	21.8463	21.8463	0.0802518	1.0572	0.709911	0.751483	21.8273	21.9718	21.3038	21.6079	21.525	22.2622	21.8344	21.7958	21.499	21.6877	22.0544	22.1429	21.4654	22.4838	22.0522	21.3847
Cellobiose	13.8524	13.8524	14.2582	14.2582	0.405799	1.32482	0.742309	0.777241	12.5799	12.5799	15.0635	12.5799	12.5799	13.5799	17.4142	14.4418	12.5799	18.0304	12.5799	17.5321	15.6033	12.5799	12.5799	12.5799
Maltose	13.8524	13.8524	14.2582	14.2582	0.405799	1.32482	0.742309	0.777241	12.5799	12.5799	15.0635	12.5799	12.5799	13.5799	17.4142	14.4418	12.5799	18.0304	12.5799	17.5321	15.6033	12.5799	12.5799	12.5799
Palatinose	13.8524	13.8524	14.2582	14.2582	0.405799	1.32482	0.744167	0.777241	12.5799	12.5799	15.0635	12.5799	12.5799	13.5799	17.4142	14.4418	12.5799	18.0304	12.5799	17.5321	15.6033	12.5799	12.5799	12.5799
PS (36:4)	18.2703	18.2703	18.3218	18.3218	0.0515705	1.03639	0.822316	0.855063	18.5628	18.5361	17.9178	18.4372	18.4944	18.1371	18.1337	17.943	19.0838	18.256	18.0025	16.9807	18.8369	18.2723	18.6275	18.5148
Lumichrome	21.1032	21.1032	21.1805	21.1805	0.077372	1.05509	0.856748	0.886942	23.3324	20.5815	20.9881	21.2628	20.2208	21.0852	20.8403	20.5142	21.2432	23.2156	20.7498	22.1206	20.5679	20.7071	20.8971	19.943
3-Hydroxymethylglutarate	22.4623	22.4623	22.4719	22.4719	0.00958302	1.00666	0.882412	0.909503	22.3621	22.3037	22.4085	22.4602	22.4058	22.4813	22.548	22.7289	22.6173	22.5152	22.432	22.4346	22.4326	22.5407	22.4205	22.3823
Deoxyribose	15.6601	15.6601	15.766	15.766	0.105952	1.0762	0.9076	0.93138	16.646	14.7475	17.0205	13.7475	16.1893	15.7359	13.7475	17.4463	17.5275	16.9942	13.7475	16.734	16.9881	13.7475	13.7475	16.6419
Carnitine (12:0)	15.4182	15.4182	15.3617	15.3617	-0.0565208	0.96158	0.916568	0.93244	16.4998	15.7048	16.5962	16.2519	13.5278	14.7304	16.5072	13.5278	16.5669	15.6387	13.5278	15.5875	13.5278	16.5475	14.5278	16.9697
Pentoses	15.1397	15.1397	15.1961	15.1961	0.0564366	1.03989	0.913231	0.93244	13.7387	16.0058	14.6237	13.7691	15.8237	14.1185	15.9898	17.0481	15.4515	15.3091	15.0653	14.7757	13.9355	15.3927	15.93	15.709
Oleamide	20.262	20.262	20.235	20.235	-0.0270058	0.981455	0.930189	0.942217	20.3583	20.5237	20.2927	20.5223	20.3344	20.4228	20.0904	19.5517	20.7174	20.4031	19.5542	20.1995	19.5962	20.4089	20.7007	20.3001
Uridine diphosphate	19.7839	19.7839	19.7761	19.7761	-0.00782249	0.994593	0.943754	0.951855	19.5253	19.1038	19.713	19.8492	20.0537	19.8419	19.8112	20.373	19.3089	19.3279	19.6801	19.8611	19.7542	20.2671	20.027	19.9824
Homocysteine thiolactone	15.4458	15.4458	15.4266	15.4266	-0.0192285	0.98676	0.962981	0.967096	15.0605	16.1379	16.0605	15.0605	15.0605	15.0605	16.0653	15.0605	17.9888	15.0605	15.0605	15.0605	15.0605	15.0605	15.0605	15.0605
alpha-Ketoglutarate	18.6018	18.6018	18.6062	18.6062	0.00442735	1.00307	0.993276	0.993276	19.0956	18.6081	18.3679	18.8351	17.9948	18.8274	18.0795	19.006	19.238	19.3526	19.0409	18.6967	19.0781	18.8444	15.6244	18.9748
1-Aminocyclopropanecarboxylate	11.4891	11.4891	11.4891	11.4891	0	1			11.4891	11.4891	11.4891	11.4891	11.4891	11.4891	11.4891	11.4891	11.4891	11.4891	11.4891	11.4891	11.4891	11.4891	11.4891	11.4891
1-Hydroxy-2-naphthoate	11.4891	11.4891	11.4891	11.4891	0	1			11.4891	11.4891	11.4891	11.4891	11.4891	11.4891	11.4891	11.4891	11.4891	11.4891	11.4891	11.4891	11.4891	11.4891	11.4891	11.4891
1-Methyladenosine	11.4891	11.4891	11.4891	11.4891	0	1			11.4891	11.4891	11.4891	11.4891	11.4891	11.4891	11.4891	11.4891	11.4891	11.4891	11.4891	11.4891	11.4891	11.4891	11.4891	11.4891
1-Methylnicotinamide	11.4891	11.4891	11.4891	11.4891	0	1			11.4891	11.4891	11.4891	11.4891	11.4891	11.4891	11.4891	11.4891	11.4891	11.4891	11.4891	11.4891	11.4891	11.4891	11.4891	11.4891
1,3/ 2,3-Bisphosphoglycerate	11.4891	11.4891	11.4891	11.4891	0	1			11.4891	11.4891	11.4891	11.4891	11.4891	11.4891	11.4891	11.4891	11.4891	11.4891	11.4891	11.4891	11.4891	11.4891	11.4891	11.4891
2-(3-Carboxy-3-aminopropyl)-histidine	11.4891	11.4891	11.4891	11.4891	0	1			11.4891	11.4891	11.4891	11.4891	11.4891	11.4891	11.4891	11.4891	11.4891	11.4891	11.4891	11.4891	11.4891	11.4891	11.4891	11.4891
2-Aminophenol	11.4891	11.4891	11.4891	11.4891	0	1			11.4891	11.4891	11.4891	11.4891	11.4891	11.4891	11.4891	11.4891	11.4891	11.4891	11.4891	11.4891	11.4891	11.4891	11.4891	11.4891
2-Deoxyglucose	11.4891	11.4891	11.4891	11.4891	0	1			11.4891	11.4891	11.4891	11.4891	11.4891	11.4891	11.4891	11.4891	11.4891	11.4891	11.4891	11.4891	11.4891	11.4891	11.4891	11.4891
2-Hydroxy-4-(methylthio)butanoate	11.4891	11.4891	11.4891	11.4891	0	1			11.4891	11.4891	11.4891	11.4891	11.4891	11.4891	11.4891	11.4891	11.4891	11.4891	11.4891	11.4891	11.4891	11.4891	11.4891	11.4891
2-Hydroxyphenylacetate	11.4891	11.4891	11.4891	11.4891	0	1			11.4891	11.4891	11.4891	11.4891	11.4891	11.4891	11.4891	11.4891	11.4891	11.4891	11.4891	11.4891	11.4891	11.4891	11.4891	11.4891
2-Mannosyl-3-phosphoglycerate	11.4891	11.4891	11.4891	11.4891	0	1			11.4891	11.4891	11.4891	11.4891	11.4891	11.4891	11.4891	11.4891	11.4891	11.4891	11.4891	11.4891	11.4891	11.4891	11.4891	11.4891
2-Methylmaleate	11.4891	11.4891	11.4891	11.4891	0	1			11.4891	11.4891	11.4891	11.4891	11.4891	11.4891	11.4891	11.4891	11.4891	11.4891	11.4891	11.4891	11.4891	11.4891	11.4891	11.4891
2,3-Diaminopropionate	11.4891	11.4891	11.4891	11.4891	0	1			11.4891	11.4891	11.4891	11.4891	11.4891	11.4891	11.4891	11.4891	11.4891	11.4891	11.4891	11.4891	11.4891	11.4891	11.4891	11.4891
2,3-Dihydroxybenzoate	11.4891	11.4891	11.4891	11.4891	0	1			11.4891	11.4891	11.4891	11.4891	11.4891	11.4891	11.4891	11.4891	11.4891	11.4891	11.4891	11.4891	11.4891	11.4891	11.4891	11.4891
2,4-Dihydroxypteridine	11.4891	11.4891	11.4891	11.4891	0	1			11.4891	11.4891	11.4891	11.4891	11.4891	11.4891	11.4891	11.4891	11.4891	11.4891	11.4891	11.4891	11.4891	11.4891	11.4891	11.4891
2,5-Dihydroxybenzoate	11.4891	11.4891	11.4891	11.4891	0	1			11.4891	11.4891	11.4891	11.4891	11.4891	11.4891	11.4891	11.4891	11.4891	11.4891	11.4891	11.4891	11.4891	11.4891	11.4891	11.4891
2,5-Dimethylpyrazine	11.4891	11.4891	11.4891	11.4891	0	1			11.4891	11.4891	11.4891	11.4891	11.4891	11.4891	11.4891	11.4891	11.4891	11.4891	11.4891	11.4891	11.4891	11.4891	11.4891	11.4891
2,6-Dihydroxypyridine	11.4891	11.4891	11.4891	11.4891	0	1			11.4891	11.4891	11.4891	11.4891	11.4891	11.4891	11.4891	11.4891	11.4891	11.4891	11.4891	11.4891	11.4891	11.4891	11.4891	11.4891
3-(2-Hydroxyphenyl)propanoate	11.4891	11.4891	11.4891	11.4891	0	1			11.4891	11.4891	11.4891	11.4891	11.4891	11.4891	11.4891	11.4891	11.4891	11.4891	11.4891	11.4891	11.4891	11.4891	11.4891	11.4891
3-(4-Hydroxyphenyl)pyruvate	11.4891	11.4891	11.4891	11.4891	0	1			11.4891	11.4891	11.4891	11.4891	11.4891	11.4891	11.4891	11.4891	11.4891	11.4891	11.4891	11.4891	11.4891	11.4891	11.4891	11.4891
3-Amino-4-hydroxybenzoate	11.4891	11.4891	11.4891	11.4891	0	1			11.4891	11.4891	11.4891	11.4891	11.4891	11.4891	11.4891	11.4891	11.4891	11.4891	11.4891	11.4891	11.4891	11.4891	11.4891	11.4891
3-Amino-5-hydroxybenzoate	11.4891	11.4891	11.4891	11.4891	0	1			11.4891	11.4891	11.4891	11.4891	11.4891	11.4891	11.4891	11.4891	11.4891	11.4891	11.4891	11.4891	11.4891	11.4891	11.4891	11.4891
3-Dehydroshikimate	11.4891	11.4891	11.4891	11.4891	0	1			11.4891	11.4891	11.4891	11.4891	11.4891	11.4891	11.4891	11.4891	11.4891	11.4891	11.4891	11.4891	11.4891	11.4891	11.4891	11.4891
3-Hydroxy-3-methylglutaryl-CoA	11.4891	11.4891	11.4891	11.4891	0	1			11.4891	11.4891	11.4891	11.4891	11.4891	11.4891	11.4891	11.4891	11.4891	11.4891	11.4891	11.4891	11.4891	11.4891	11.4891	11.4891
3-Hydroxyanthranilate	11.4891	11.4891	11.4891	11.4891	0	1			11.4891	11.4891	11.4891	11.4891	11.4891	11.4891	11.4891	11.4891	11.4891	11.4891	11.4891	11.4891	11.4891	11.4891	11.4891	11.4891
3-Hydroxybenzoate	11.4891	11.4891	11.4891	11.4891	0	1			11.4891	11.4891	11.4891	11.4891	11.4891	11.4891	11.4891	11.4891	11.4891	11.4891	11.4891	11.4891	11.4891	11.4891	11.4891	11.4891
3-Hydroxybutyrate	11.4891	11.4891	11.4891	11.4891	0	1			11.4891	11.4891	11.4891	11.4891	11.4891	11.4891	11.4891	11.4891	11.4891	11.4891	11.4891	11.4891	11.4891	11.4891	11.4891	11.4891
3-Hydroxycarnitine (18:1)	13.6812	13.6812	13.5472	13.5472	-0.133974	0.911318			13.1841	13.1841	13.1841	13.1841	13.1841	13.1841	14.1841	16.161	16.0892	13.1841	13.1841	13.1841	13.1841	13.1841	13.1841	13.1841
3-Hydroxycarnitine (8:0)	11.4891	11.4891	11.4891	11.4891	0	1			11.4891	11.4891	11.4891	11.4891	11.4891	11.4891	11.4891	11.4891	11.4891	11.4891	11.4891	11.4891	11.4891	11.4891	11.4891	11.4891
3-Hydroxyphenylacetate	11.4891	11.4891	11.4891	11.4891	0	1			11.4891	11.4891	11.4891	11.4891	11.4891	11.4891	11.4891	11.4891	11.4891	11.4891	11.4891	11.4891	11.4891	11.4891	11.4891	11.4891
3-Methoxy-4-hydroxymandelate	11.4891	11.4891	11.4891	11.4891	0	1			11.4891	11.4891	11.4891	11.4891	11.4891	11.4891	11.4891	11.4891	11.4891	11.4891	11.4891	11.4891	11.4891	11.4891	11.4891	11.4891
3-Methoxytyramine	11.4891	11.4891	11.4891	11.4891	0	1			11.4891	11.4891	11.4891	11.4891	11.4891	11.4891	11.4891	11.4891	11.4891	11.4891	11.4891	11.4891	11.4891	11.4891	11.4891	11.4891
3-Methoxytyrosine	11.4891	11.4891	11.4891	11.4891	0	1			11.4891	11.4891	11.4891	11.4891	11.4891	11.4891	11.4891	11.4891	11.4891	11.4891	11.4891	11.4891	11.4891	11.4891	11.4891	11.4891
3-Methyl-2-oxindole	11.4891	11.4891	11.4891	11.4891	0	1			11.4891	11.4891	11.4891	11.4891	11.4891	11.4891	11.4891	11.4891	11.4891	11.4891	11.4891	11.4891	11.4891	11.4891	11.4891	11.4891
3-Methyl-2-oxovalerate	11.4891	11.4891	11.4891	11.4891	0	1			11.4891	11.4891	11.4891	11.4891	11.4891	11.4891	11.4891	11.4891	11.4891	11.4891	11.4891	11.4891	11.4891	11.4891	11.4891	11.4891
3-Methyladenine	11.4891	11.4891	11.4891	11.4891	0	1			11.4891	11.4891	11.4891	11.4891	11.4891	11.4891	11.4891	11.4891	11.4891	11.4891	11.4891	11.4891	11.4891	11.4891	11.4891	11.4891
3-Methylcrotonyl-CoA	11.4891	11.4891	11.4891	11.4891	0	1			11.4891	11.4891	11.4891	11.4891	11.4891	11.4891	11.4891	11.4891	11.4891	11.4891	11.4891	11.4891	11.4891	11.4891	11.4891	11.4891
3-Methylhistamine	11.4891	11.4891	11.4891	11.4891	0	1			11.4891	11.4891	11.4891	11.4891	11.4891	11.4891	11.4891	11.4891	11.4891	11.4891	11.4891	11.4891	11.4891	11.4891	11.4891	11.4891
3-Nitrotyrosine	11.4891	11.4891	11.4891	11.4891	0	1			11.4891	11.4891	11.4891	11.4891	11.4891	11.4891	11.4891	11.4891	11.4891	11.4891	11.4891	11.4891	11.4891	11.4891	11.4891	11.4891
3-Sulfinoalanine	11.4891	11.4891	11.4891	11.4891	0	1			11.4891	11.4891	11.4891	11.4891	11.4891	11.4891	11.4891	11.4891	11.4891	11.4891	11.4891	11.4891	11.4891	11.4891	11.4891	11.4891
3,4 Dihydroxymandelate	11.4891	11.4891	11.4891	11.4891	0	1			11.4891	11.4891	11.4891	11.4891	11.4891	11.4891	11.4891	11.4891	11.4891	11.4891	11.4891	11.4891	11.4891	11.4891	11.4891	11.4891
3,4-Dihydroxybenzoate	11.4891	11.4891	11.4891	11.4891	0	1			11.4891	11.4891	11.4891	11.4891	11.4891	11.4891	11.4891	11.4891	11.4891	11.4891	11.4891	11.4891	11.4891	11.4891	11.4891	11.4891
3,4-Dihydroxyphenylacetate	11.4891	11.4891	11.4891	11.4891	0	1			11.4891	11.4891	11.4891	11.4891	11.4891	11.4891	11.4891	11.4891	11.4891	11.4891	11.4891	11.4891	11.4891	11.4891	11.4891	11.4891
3,4-Dihydroxyphenylglycol	11.4891	11.4891	11.4891	11.4891	0	1			11.4891	11.4891	11.4891	11.4891	11.4891	11.4891	11.4891	11.4891	11.4891	11.4891	11.4891	11.4891	11.4891	11.4891	11.4891	11.4891
3,5-Diiodothyronine	11.4891	11.4891	11.4891	11.4891	0	1			11.4891	11.4891	11.4891	11.4891	11.4891	11.4891	11.4891	11.4891	11.4891	11.4891	11.4891	11.4891	11.4891	11.4891	11.4891	11.4891
3,5-Diiodotyrosine	11.4891	11.4891	11.4891	11.4891	0	1			11.4891	11.4891	11.4891	11.4891	11.4891	11.4891	11.4891	11.4891	11.4891	11.4891	11.4891	11.4891	11.4891	11.4891	11.4891	11.4891
4-Acetamidobutanoate	11.4891	11.4891	11.4891	11.4891	0	1			11.4891	11.4891	11.4891	11.4891	11.4891	11.4891	11.4891	11.4891	11.4891	11.4891	11.4891	11.4891	11.4891	11.4891	11.4891	11.4891
4-Aminobenzoate	11.4891	11.4891	11.4891	11.4891	0	1			11.4891	11.4891	11.4891	11.4891	11.4891	11.4891	11.4891	11.4891	11.4891	11.4891	11.4891	11.4891	11.4891	11.4891	11.4891	11.4891
4-Coumarate	11.4891	11.4891	11.4891	11.4891	0	1			11.4891	11.4891	11.4891	11.4891	11.4891	11.4891	11.4891	11.4891	11.4891	11.4891	11.4891	11.4891	11.4891	11.4891	11.4891	11.4891
4-Hydroxybenzoate	11.4891	11.4891	11.4891	11.4891	0	1			11.4891	11.4891	11.4891	11.4891	11.4891	11.4891	11.4891	11.4891	11.4891	11.4891	11.4891	11.4891	11.4891	11.4891	11.4891	11.4891
4-Hydroxyphenylglycine	11.4891	11.4891	11.4891	11.4891	0	1			11.4891	11.4891	11.4891	11.4891	11.4891	11.4891	11.4891	11.4891	11.4891	11.4891	11.4891	11.4891	11.4891	11.4891	11.4891	11.4891
4-Imidazoleacetate	11.4891	11.4891	11.4891	11.4891	0	1			11.4891	11.4891	11.4891	11.4891	11.4891	11.4891	11.4891	11.4891	11.4891	11.4891	11.4891	11.4891	11.4891	11.4891	11.4891	11.4891
4-Methylcatechol	11.4891	11.4891	11.4891	11.4891	0	1			11.4891	11.4891	11.4891	11.4891	11.4891	11.4891	11.4891	11.4891	11.4891	11.4891	11.4891	11.4891	11.4891	11.4891	11.4891	11.4891
4alpha-Hydroxyformyl-4beta-methyl-5alpha-cholest-8-en-3beta-ol	15.9712	15.9712	15.9712	15.9712	0	1			15.9712	15.9712	15.9712	15.9712	15.9712	15.9712	15.9712	15.9712	15.9712	15.9712	15.9712	15.9712	15.9712	15.9712	15.9712	15.9712
5-Aminopentanoate	11.4891	11.4891	11.4891	11.4891	0	1			11.4891	11.4891	11.4891	11.4891	11.4891	11.4891	11.4891	11.4891	11.4891	11.4891	11.4891	11.4891	11.4891	11.4891	11.4891	11.4891
5-Hydroxyindoleacetate	11.4891	11.4891	11.4891	11.4891	0	1			11.4891	11.4891	11.4891	11.4891	11.4891	11.4891	11.4891	11.4891	11.4891	11.4891	11.4891	11.4891	11.4891	11.4891	11.4891	11.4891
5-Hydroxylysine	11.4891	11.4891	11.4891	11.4891	0	1			11.4891	11.4891	11.4891	11.4891	11.4891	11.4891	11.4891	11.4891	11.4891	11.4891	11.4891	11.4891	11.4891	11.4891	11.4891	11.4891
5-Hydroxytryptophan	11.4891	11.4891	11.4891	11.4891	0	1			11.4891	11.4891	11.4891	11.4891	11.4891	11.4891	11.4891	11.4891	11.4891	11.4891	11.4891	11.4891	11.4891	11.4891	11.4891	11.4891
5-Methylcytosine	11.4891	11.4891	11.4891	11.4891	0	1			11.4891	11.4891	11.4891	11.4891	11.4891	11.4891	11.4891	11.4891	11.4891	11.4891	11.4891	11.4891	11.4891	11.4891	11.4891	11.4891
6-Carboxyhexanoate	11.4891	11.4891	11.4891	11.4891	0	1			11.4891	11.4891	11.4891	11.4891	11.4891	11.4891	11.4891	11.4891	11.4891	11.4891	11.4891	11.4891	11.4891	11.4891	11.4891	11.4891
6-Hydroxynicotinate	11.4891	11.4891	11.4891	11.4891	0	1			11.4891	11.4891	11.4891	11.4891	11.4891	11.4891	11.4891	11.4891	11.4891	11.4891	11.4891	11.4891	11.4891	11.4891	11.4891	11.4891
6-Phosphogluconate	11.4891	11.4891	11.4891	11.4891	0	1			11.4891	11.4891	11.4891	11.4891	11.4891	11.4891	11.4891	11.4891	11.4891	11.4891	11.4891	11.4891	11.4891	11.4891	11.4891	11.4891
6-Phosphonogluconolactone	11.4891	11.4891	11.4891	11.4891	0	1			11.4891	11.4891	11.4891	11.4891	11.4891	11.4891	11.4891	11.4891	11.4891	11.4891	11.4891	11.4891	11.4891	11.4891	11.4891	11.4891
7-Methylxanthine	11.4891	11.4891	11.4891	11.4891	0	1			11.4891	11.4891	11.4891	11.4891	11.4891	11.4891	11.4891	11.4891	11.4891	11.4891	11.4891	11.4891	11.4891	11.4891	11.4891	11.4891
Acetoacetate	11.4891	11.4891	11.4891	11.4891	0	1			11.4891	11.4891	11.4891	11.4891	11.4891	11.4891	11.4891	11.4891	11.4891	11.4891	11.4891	11.4891	11.4891	11.4891	11.4891	11.4891
Acetoin	11.4891	11.4891	11.4891	11.4891	0	1			11.4891	11.4891	11.4891	11.4891	11.4891	11.4891	11.4891	11.4891	11.4891	11.4891	11.4891	11.4891	11.4891	11.4891	11.4891	11.4891
Acetyl-CoA	11.4891	11.4891	11.4891	11.4891	0	1			11.4891	11.4891	11.4891	11.4891	11.4891	11.4891	11.4891	11.4891	11.4891	11.4891	11.4891	11.4891	11.4891	11.4891	11.4891	11.4891
Acetylacrylate	11.4891	11.4891	11.4891	11.4891	0	1			11.4891	11.4891	11.4891	11.4891	11.4891	11.4891	11.4891	11.4891	11.4891	11.4891	11.4891	11.4891	11.4891	11.4891	11.4891	11.4891
Adenosine cyclic phosphate	11.4891	11.4891	11.4891	11.4891	0	1			11.4891	11.4891	11.4891	11.4891	11.4891	11.4891	11.4891	11.4891	11.4891	11.4891	11.4891	11.4891	11.4891	11.4891	11.4891	11.4891
Adenylsuccinate	11.4891	11.4891	11.4891	11.4891	0	1			11.4891	11.4891	11.4891	11.4891	11.4891	11.4891	11.4891	11.4891	11.4891	11.4891	11.4891	11.4891	11.4891	11.4891	11.4891	11.4891
Adipate	11.4891	11.4891	11.4891	11.4891	0	1			11.4891	11.4891	11.4891	11.4891	11.4891	11.4891	11.4891	11.4891	11.4891	11.4891	11.4891	11.4891	11.4891	11.4891	11.4891	11.4891
ADP-glucose	11.4891	11.4891	11.4891	11.4891	0	1			11.4891	11.4891	11.4891	11.4891	11.4891	11.4891	11.4891	11.4891	11.4891	11.4891	11.4891	11.4891	11.4891	11.4891	11.4891	11.4891
ADP-ribose	13.5173	13.5173	13.4781	13.4781	-0.0392642	0.973151			13.2597	13.2597	14.2597	13.2597	13.2597	14.3207	13.2597	13.2597	13.2597	13.2597	13.2597	13.2597	13.2597	13.2597	15.0065	13.2597
ADP-ribose phosphate	11.4891	11.4891	11.4891	11.4891	0	1			11.4891	11.4891	11.4891	11.4891	11.4891	11.4891	11.4891	11.4891	11.4891	11.4891	11.4891	11.4891	11.4891	11.4891	11.4891	11.4891
Agmatine sulfate	11.4891	11.4891	11.4891	11.4891	0	1			11.4891	11.4891	11.4891	11.4891	11.4891	11.4891	11.4891	11.4891	11.4891	11.4891	11.4891	11.4891	11.4891	11.4891	11.4891	11.4891
AICAR	11.4891	11.4891	11.4891	11.4891	0	1			11.4891	11.4891	11.4891	11.4891	11.4891	11.4891	11.4891	11.4891	11.4891	11.4891	11.4891	11.4891	11.4891	11.4891	11.4891	11.4891
Ala-Leu	12.2885	12.2885	12.4139	12.4139	0.125372	1.09079			11.9998	12.9998	13.3094	11.9998	11.9998	11.9998	11.9998	11.9998	11.9998	11.9998	11.9998	11.9998	13.9293	11.9998	13.3829	11.9998
Ala-Tyr	11.4891	11.4891	11.4891	11.4891	0	1			11.4891	11.4891	11.4891	11.4891	11.4891	11.4891	11.4891	11.4891	11.4891	11.4891	11.4891	11.4891	11.4891	11.4891	11.4891	11.4891
Allothreonine	11.4891	11.4891	11.4891	11.4891	0	1			11.4891	11.4891	11.4891	11.4891	11.4891	11.4891	11.4891	11.4891	11.4891	11.4891	11.4891	11.4891	11.4891	11.4891	11.4891	11.4891
Aminoadipate	11.4891	11.4891	11.4891	11.4891	0	1			11.4891	11.4891	11.4891	11.4891	11.4891	11.4891	11.4891	11.4891	11.4891	11.4891	11.4891	11.4891	11.4891	11.4891	11.4891	11.4891
Aminocaprylate	11.4891	11.4891	11.4891	11.4891	0	1			11.4891	11.4891	11.4891	11.4891	11.4891	11.4891	11.4891	11.4891	11.4891	11.4891	11.4891	11.4891	11.4891	11.4891	11.4891	11.4891
Aminoisobutanoate	11.4891	11.4891	11.4891	11.4891	0	1			11.4891	11.4891	11.4891	11.4891	11.4891	11.4891	11.4891	11.4891	11.4891	11.4891	11.4891	11.4891	11.4891	11.4891	11.4891	11.4891
Aniline-2-sulfonate	11.4891	11.4891	11.4891	11.4891	0	1			11.4891	11.4891	11.4891	11.4891	11.4891	11.4891	11.4891	11.4891	11.4891	11.4891	11.4891	11.4891	11.4891	11.4891	11.4891	11.4891
Anserine	11.4891	11.4891	11.4891	11.4891	0	1			11.4891	11.4891	11.4891	11.4891	11.4891	11.4891	11.4891	11.4891	11.4891	11.4891	11.4891	11.4891	11.4891	11.4891	11.4891	11.4891
Anthranilate	11.4891	11.4891	11.4891	11.4891	0	1			11.4891	11.4891	11.4891	11.4891	11.4891	11.4891	11.4891	11.4891	11.4891	11.4891	11.4891	11.4891	11.4891	11.4891	11.4891	11.4891
Arg-Ala	11.4891	11.4891	11.4891	11.4891	0	1			11.4891	11.4891	11.4891	11.4891	11.4891	11.4891	11.4891	11.4891	11.4891	11.4891	11.4891	11.4891	11.4891	11.4891	11.4891	11.4891
Asp-Pro	11.4891	11.4891	11.4891	11.4891	0	1			11.4891	11.4891	11.4891	11.4891	11.4891	11.4891	11.4891	11.4891	11.4891	11.4891	11.4891	11.4891	11.4891	11.4891	11.4891	11.4891
Aspartylglycosamine	11.4891	11.4891	11.4891	11.4891	0	1			11.4891	11.4891	11.4891	11.4891	11.4891	11.4891	11.4891	11.4891	11.4891	11.4891	11.4891	11.4891	11.4891	11.4891	11.4891	11.4891
beta-Alanine	11.4891	11.4891	11.4891	11.4891	0	1			11.4891	11.4891	11.4891	11.4891	11.4891	11.4891	11.4891	11.4891	11.4891	11.4891	11.4891	11.4891	11.4891	11.4891	11.4891	11.4891
Betaine	11.4891	11.4891	11.4891	11.4891	0	1			11.4891	11.4891	11.4891	11.4891	11.4891	11.4891	11.4891	11.4891	11.4891	11.4891	11.4891	11.4891	11.4891	11.4891	11.4891	11.4891
Biliverdin	11.4891	11.4891	11.4891	11.4891	0	1			11.4891	11.4891	11.4891	11.4891	11.4891	11.4891	11.4891	11.4891	11.4891	11.4891	11.4891	11.4891	11.4891	11.4891	11.4891	11.4891
Biotin	11.4891	11.4891	11.4891	11.4891	0	1			11.4891	11.4891	11.4891	11.4891	11.4891	11.4891	11.4891	11.4891	11.4891	11.4891	11.4891	11.4891	11.4891	11.4891	11.4891	11.4891
Biotin amide	11.4891	11.4891	11.4891	11.4891	0	1			11.4891	11.4891	11.4891	11.4891	11.4891	11.4891	11.4891	11.4891	11.4891	11.4891	11.4891	11.4891	11.4891	11.4891	11.4891	11.4891
Butanoate	11.4891	11.4891	11.4891	11.4891	0	1			11.4891	11.4891	11.4891	11.4891	11.4891	11.4891	11.4891	11.4891	11.4891	11.4891	11.4891	11.4891	11.4891	11.4891	11.4891	11.4891
Butyryl-CoA	11.4891	11.4891	11.4891	11.4891	0	1			11.4891	11.4891	11.4891	11.4891	11.4891	11.4891	11.4891	11.4891	11.4891	11.4891	11.4891	11.4891	11.4891	11.4891	11.4891	11.4891
Caffeate	11.4891	11.4891	11.4891	11.4891	0	1			11.4891	11.4891	11.4891	11.4891	11.4891	11.4891	11.4891	11.4891	11.4891	11.4891	11.4891	11.4891	11.4891	11.4891	11.4891	11.4891
Carnitine (20:0)	11.4891	11.4891	11.4891	11.4891	0	1			11.4891	11.4891	11.4891	11.4891	11.4891	11.4891	11.4891	11.4891	11.4891	11.4891	11.4891	11.4891	11.4891	11.4891	11.4891	11.4891
Carnitine (6:0)	11.4891	11.4891	11.4891	11.4891	0	1			11.4891	11.4891	11.4891	11.4891	11.4891	11.4891	11.4891	11.4891	11.4891	11.4891	11.4891	11.4891	11.4891	11.4891	11.4891	11.4891
Carnitine (8:0)	11.4891	11.4891	11.4891	11.4891	0	1			11.4891	11.4891	11.4891	11.4891	11.4891	11.4891	11.4891	11.4891	11.4891	11.4891	11.4891	11.4891	11.4891	11.4891	11.4891	11.4891
Carnitine (glutaryl)	11.4891	11.4891	11.4891	11.4891	0	1			11.4891	11.4891	11.4891	11.4891	11.4891	11.4891	11.4891	11.4891	11.4891	11.4891	11.4891	11.4891	11.4891	11.4891	11.4891	11.4891
Carnosine	13.3761	13.3761	13.1236	13.1236	-0.252499	0.839441			14.1236	13.1236	13.1236	13.1236	14.1436	13.1236	13.1236	13.1236	13.1236	13.1236	13.1236	13.1236	13.1236	13.1236	13.1236	13.1236
Cholate	11.4891	11.4891	11.4891	11.4891	0	1			11.4891	11.4891	11.4891	11.4891	11.4891	11.4891	11.4891	11.4891	11.4891	11.4891	11.4891	11.4891	11.4891	11.4891	11.4891	11.4891
Ciliatine	11.4891	11.4891	11.4891	11.4891	0	1			11.4891	11.4891	11.4891	11.4891	11.4891	11.4891	11.4891	11.4891	11.4891	11.4891	11.4891	11.4891	11.4891	11.4891	11.4891	11.4891
Citrate/Isocitrate	11.4891	11.4891	11.4891	11.4891	0	1			11.4891	11.4891	11.4891	11.4891	11.4891	11.4891	11.4891	11.4891	11.4891	11.4891	11.4891	11.4891	11.4891	11.4891	11.4891	11.4891
Cortexolone	11.4891	11.4891	11.4891	11.4891	0	1			11.4891	11.4891	11.4891	11.4891	11.4891	11.4891	11.4891	11.4891	11.4891	11.4891	11.4891	11.4891	11.4891	11.4891	11.4891	11.4891
Cortisol	11.4891	11.4891	11.4891	11.4891	0	1			11.4891	11.4891	11.4891	11.4891	11.4891	11.4891	11.4891	11.4891	11.4891	11.4891	11.4891	11.4891	11.4891	11.4891	11.4891	11.4891
Cyclic GMP	11.4891	11.4891	11.4891	11.4891	0	1			11.4891	11.4891	11.4891	11.4891	11.4891	11.4891	11.4891	11.4891	11.4891	11.4891	11.4891	11.4891	11.4891	11.4891	11.4891	11.4891
Cysteate	11.4891	11.4891	11.4891	11.4891	0	1			11.4891	11.4891	11.4891	11.4891	11.4891	11.4891	11.4891	11.4891	11.4891	11.4891	11.4891	11.4891	11.4891	11.4891	11.4891	11.4891
Cystine	11.4891	11.4891	11.4891	11.4891	0	1			11.4891	11.4891	11.4891	11.4891	11.4891	11.4891	11.4891	11.4891	11.4891	11.4891	11.4891	11.4891	11.4891	11.4891	11.4891	11.4891
Cytidine	11.4891	11.4891	11.4891	11.4891	0	1			11.4891	11.4891	11.4891	11.4891	11.4891	11.4891	11.4891	11.4891	11.4891	11.4891	11.4891	11.4891	11.4891	11.4891	11.4891	11.4891
Cytidine cyclic phosphate	11.4891	11.4891	11.4891	11.4891	0	1			11.4891	11.4891	11.4891	11.4891	11.4891	11.4891	11.4891	11.4891	11.4891	11.4891	11.4891	11.4891	11.4891	11.4891	11.4891	11.4891
Cytosine	11.4891	11.4891	11.4891	11.4891	0	1			11.4891	11.4891	11.4891	11.4891	11.4891	11.4891	11.4891	11.4891	11.4891	11.4891	11.4891	11.4891	11.4891	11.4891	11.4891	11.4891
Deoxyadenosine	11.4891	11.4891	11.4891	11.4891	0	1			11.4891	11.4891	11.4891	11.4891	11.4891	11.4891	11.4891	11.4891	11.4891	11.4891	11.4891	11.4891	11.4891	11.4891	11.4891	11.4891
Deoxyadenosine monophosphate	11.4891	11.4891	11.4891	11.4891	0	1			11.4891	11.4891	11.4891	11.4891	11.4891	11.4891	11.4891	11.4891	11.4891	11.4891	11.4891	11.4891	11.4891	11.4891	11.4891	11.4891
Deoxyadenosine triphosphate	11.4891	11.4891	11.4891	11.4891	0	1			11.4891	11.4891	11.4891	11.4891	11.4891	11.4891	11.4891	11.4891	11.4891	11.4891	11.4891	11.4891	11.4891	11.4891	11.4891	11.4891
Deoxycholate	11.4891	11.4891	11.4891	11.4891	0	1			11.4891	11.4891	11.4891	11.4891	11.4891	11.4891	11.4891	11.4891	11.4891	11.4891	11.4891	11.4891	11.4891	11.4891	11.4891	11.4891
Deoxycytidine	11.4891	11.4891	11.4891	11.4891	0	1			11.4891	11.4891	11.4891	11.4891	11.4891	11.4891	11.4891	11.4891	11.4891	11.4891	11.4891	11.4891	11.4891	11.4891	11.4891	11.4891
Deoxycytidine diphosphate	11.4891	11.4891	11.4891	11.4891	0	1			11.4891	11.4891	11.4891	11.4891	11.4891	11.4891	11.4891	11.4891	11.4891	11.4891	11.4891	11.4891	11.4891	11.4891	11.4891	11.4891
Deoxycytidine monophosphate	11.4891	11.4891	11.4891	11.4891	0	1			11.4891	11.4891	11.4891	11.4891	11.4891	11.4891	11.4891	11.4891	11.4891	11.4891	11.4891	11.4891	11.4891	11.4891	11.4891	11.4891
Deoxyguanosine	11.4891	11.4891	11.4891	11.4891	0	1			11.4891	11.4891	11.4891	11.4891	11.4891	11.4891	11.4891	11.4891	11.4891	11.4891	11.4891	11.4891	11.4891	11.4891	11.4891	11.4891
Deoxyguanosine diphosphate	11.4891	11.4891	11.4891	11.4891	0	1			11.4891	11.4891	11.4891	11.4891	11.4891	11.4891	11.4891	11.4891	11.4891	11.4891	11.4891	11.4891	11.4891	11.4891	11.4891	11.4891
Deoxyguanosine monophosphate	11.4891	11.4891	11.4891	11.4891	0	1			11.4891	11.4891	11.4891	11.4891	11.4891	11.4891	11.4891	11.4891	11.4891	11.4891	11.4891	11.4891	11.4891	11.4891	11.4891	11.4891
Deoxyinosine	11.4891	11.4891	11.4891	11.4891	0	1			11.4891	11.4891	11.4891	11.4891	11.4891	11.4891	11.4891	11.4891	11.4891	11.4891	11.4891	11.4891	11.4891	11.4891	11.4891	11.4891
Deoxypentose monophosphates	11.4891	11.4891	11.4891	11.4891	0	1			11.4891	11.4891	11.4891	11.4891	11.4891	11.4891	11.4891	11.4891	11.4891	11.4891	11.4891	11.4891	11.4891	11.4891	11.4891	11.4891
Deoxyuridine	11.4891	11.4891	11.4891	11.4891	0	1			11.4891	11.4891	11.4891	11.4891	11.4891	11.4891	11.4891	11.4891	11.4891	11.4891	11.4891	11.4891	11.4891	11.4891	11.4891	11.4891
Deoxyuridine monophosphate	11.4891	11.4891	11.4891	11.4891	0	1			11.4891	11.4891	11.4891	11.4891	11.4891	11.4891	11.4891	11.4891	11.4891	11.4891	11.4891	11.4891	11.4891	11.4891	11.4891	11.4891
Deoxyuridine triphosphate	11.4891	11.4891	11.4891	11.4891	0	1			11.4891	11.4891	11.4891	11.4891	11.4891	11.4891	11.4891	11.4891	11.4891	11.4891	11.4891	11.4891	11.4891	11.4891	11.4891	11.4891
Diaminopimelate	11.4891	11.4891	11.4891	11.4891	0	1			11.4891	11.4891	11.4891	11.4891	11.4891	11.4891	11.4891	11.4891	11.4891	11.4891	11.4891	11.4891	11.4891	11.4891	11.4891	11.4891
Diethanolamine	11.4891	11.4891	11.4891	11.4891	0	1			11.4891	11.4891	11.4891	11.4891	11.4891	11.4891	11.4891	11.4891	11.4891	11.4891	11.4891	11.4891	11.4891	11.4891	11.4891	11.4891
Dihydroorotate	11.4891	11.4891	11.4891	11.4891	0	1			11.4891	11.4891	11.4891	11.4891	11.4891	11.4891	11.4891	11.4891	11.4891	11.4891	11.4891	11.4891	11.4891	11.4891	11.4891	11.4891
Dihydrouracil	11.4891	11.4891	11.4891	11.4891	0	1			11.4891	11.4891	11.4891	11.4891	11.4891	11.4891	11.4891	11.4891	11.4891	11.4891	11.4891	11.4891	11.4891	11.4891	11.4891	11.4891
Dihydroxyacetone phosphate	11.4891	11.4891	11.4891	11.4891	0	1			11.4891	11.4891	11.4891	11.4891	11.4891	11.4891	11.4891	11.4891	11.4891	11.4891	11.4891	11.4891	11.4891	11.4891	11.4891	11.4891
Diphthamide	11.4891	11.4891	11.4891	11.4891	0	1			11.4891	11.4891	11.4891	11.4891	11.4891	11.4891	11.4891	11.4891	11.4891	11.4891	11.4891	11.4891	11.4891	11.4891	11.4891	11.4891
Dopamine	11.4891	11.4891	11.4891	11.4891	0	1			11.4891	11.4891	11.4891	11.4891	11.4891	11.4891	11.4891	11.4891	11.4891	11.4891	11.4891	11.4891	11.4891	11.4891	11.4891	11.4891
dTDP-glucose	11.4891	11.4891	11.4891	11.4891	0	1			11.4891	11.4891	11.4891	11.4891	11.4891	11.4891	11.4891	11.4891	11.4891	11.4891	11.4891	11.4891	11.4891	11.4891	11.4891	11.4891
Epinephrine	11.4891	11.4891	11.4891	11.4891	0	1			11.4891	11.4891	11.4891	11.4891	11.4891	11.4891	11.4891	11.4891	11.4891	11.4891	11.4891	11.4891	11.4891	11.4891	11.4891	11.4891
Erythritol	11.4891	11.4891	11.4891	11.4891	0	1			11.4891	11.4891	11.4891	11.4891	11.4891	11.4891	11.4891	11.4891	11.4891	11.4891	11.4891	11.4891	11.4891	11.4891	11.4891	11.4891
Erythrose 4-phosphate	11.4891	11.4891	11.4891	11.4891	0	1			11.4891	11.4891	11.4891	11.4891	11.4891	11.4891	11.4891	11.4891	11.4891	11.4891	11.4891	11.4891	11.4891	11.4891	11.4891	11.4891
Estradiol 17-alpha	15.7746	15.7746	15.8522	15.8522	0.0776095	1.05527			15.6496	15.6496	15.6496	15.6496	15.6496	15.6496	16.6496	15.6496	15.6496	15.6496	15.6496	15.6496	15.6496	15.6496	17.2705	15.6496
Ethanolamine	11.4891	11.4891	11.4891	11.4891	0	1			11.4891	11.4891	11.4891	11.4891	11.4891	11.4891	11.4891	11.4891	11.4891	11.4891	11.4891	11.4891	11.4891	11.4891	11.4891	11.4891
Ethylmalonate	11.4891	11.4891	11.4891	11.4891	0	1			11.4891	11.4891	11.4891	11.4891	11.4891	11.4891	11.4891	11.4891	11.4891	11.4891	11.4891	11.4891	11.4891	11.4891	11.4891	11.4891
Ferulate	11.4891	11.4891	11.4891	11.4891	0	1			11.4891	11.4891	11.4891	11.4891	11.4891	11.4891	11.4891	11.4891	11.4891	11.4891	11.4891	11.4891	11.4891	11.4891	11.4891	11.4891
Formylglycine	11.4891	11.4891	11.4891	11.4891	0	1			11.4891	11.4891	11.4891	11.4891	11.4891	11.4891	11.4891	11.4891	11.4891	11.4891	11.4891	11.4891	11.4891	11.4891	11.4891	11.4891
Fructose 1,6-bisphosphate	11.4891	11.4891	11.4891	11.4891	0	1			11.4891	11.4891	11.4891	11.4891	11.4891	11.4891	11.4891	11.4891	11.4891	11.4891	11.4891	11.4891	11.4891	11.4891	11.4891	11.4891
Fucose 1-phosphate	11.4891	11.4891	11.4891	11.4891	0	1			11.4891	11.4891	11.4891	11.4891	11.4891	11.4891	11.4891	11.4891	11.4891	11.4891	11.4891	11.4891	11.4891	11.4891	11.4891	11.4891
Galacturonate	11.4891	11.4891	11.4891	11.4891	0	1			11.4891	11.4891	11.4891	11.4891	11.4891	11.4891	11.4891	11.4891	11.4891	11.4891	11.4891	11.4891	11.4891	11.4891	11.4891	11.4891
Gamma-linolenate	11.4891	11.4891	11.4891	11.4891	0	1			11.4891	11.4891	11.4891	11.4891	11.4891	11.4891	11.4891	11.4891	11.4891	11.4891	11.4891	11.4891	11.4891	11.4891	11.4891	11.4891
Glu-Asp	11.4891	11.4891	11.4891	11.4891	0	1			11.4891	11.4891	11.4891	11.4891	11.4891	11.4891	11.4891	11.4891	11.4891	11.4891	11.4891	11.4891	11.4891	11.4891	11.4891	11.4891
Glu-Gln	11.4891	11.4891	11.4891	11.4891	0	1			11.4891	11.4891	11.4891	11.4891	11.4891	11.4891	11.4891	11.4891	11.4891	11.4891	11.4891	11.4891	11.4891	11.4891	11.4891	11.4891
Gluconate	11.4891	11.4891	11.4891	11.4891	0	1			11.4891	11.4891	11.4891	11.4891	11.4891	11.4891	11.4891	11.4891	11.4891	11.4891	11.4891	11.4891	11.4891	11.4891	11.4891	11.4891
Gluconolactone	11.4891	11.4891	11.4891	11.4891	0	1			11.4891	11.4891	11.4891	11.4891	11.4891	11.4891	11.4891	11.4891	11.4891	11.4891	11.4891	11.4891	11.4891	11.4891	11.4891	11.4891
Glucosaminate	11.4891	11.4891	11.4891	11.4891	0	1			11.4891	11.4891	11.4891	11.4891	11.4891	11.4891	11.4891	11.4891	11.4891	11.4891	11.4891	11.4891	11.4891	11.4891	11.4891	11.4891
Glucosamine 6-phosphate	13.0902	13.0902	13.0902	13.0902	0	1			13.0902	13.0902	13.0902	13.0902	13.0902	13.0902	13.0902	13.0902	13.0902	13.0902	13.0902	13.0902	13.0902	13.0902	13.0902	13.0902
Glucosamine 6-sulfate	11.4891	11.4891	11.4891	11.4891	0	1			11.4891	11.4891	11.4891	11.4891	11.4891	11.4891	11.4891	11.4891	11.4891	11.4891	11.4891	11.4891	11.4891	11.4891	11.4891	11.4891
Glucose	11.4891	11.4891	11.4891	11.4891	0	1			11.4891	11.4891	11.4891	11.4891	11.4891	11.4891	11.4891	11.4891	11.4891	11.4891	11.4891	11.4891	11.4891	11.4891	11.4891	11.4891
Glucose 1-phosphate	11.4891	11.4891	11.4891	11.4891	0	1			11.4891	11.4891	11.4891	11.4891	11.4891	11.4891	11.4891	11.4891	11.4891	11.4891	11.4891	11.4891	11.4891	11.4891	11.4891	11.4891
Glutarate	11.4891	11.4891	11.4891	11.4891	0	1			11.4891	11.4891	11.4891	11.4891	11.4891	11.4891	11.4891	11.4891	11.4891	11.4891	11.4891	11.4891	11.4891	11.4891	11.4891	11.4891
Gly-Leu	11.4891	11.4891	11.4891	11.4891	0	1			11.4891	11.4891	11.4891	11.4891	11.4891	11.4891	11.4891	11.4891	11.4891	11.4891	11.4891	11.4891	11.4891	11.4891	11.4891	11.4891
Glyceraldehyde	11.4891	11.4891	11.4891	11.4891	0	1			11.4891	11.4891	11.4891	11.4891	11.4891	11.4891	11.4891	11.4891	11.4891	11.4891	11.4891	11.4891	11.4891	11.4891	11.4891	11.4891
Glycerate	11.4891	11.4891	11.4891	11.4891	0	1			11.4891	11.4891	11.4891	11.4891	11.4891	11.4891	11.4891	11.4891	11.4891	11.4891	11.4891	11.4891	11.4891	11.4891	11.4891	11.4891
Glycine	11.4891	11.4891	11.4891	11.4891	0	1			11.4891	11.4891	11.4891	11.4891	11.4891	11.4891	11.4891	11.4891	11.4891	11.4891	11.4891	11.4891	11.4891	11.4891	11.4891	11.4891
Glycochenodeoxycholate	11.4891	11.4891	11.4891	11.4891	0	1			11.4891	11.4891	11.4891	11.4891	11.4891	11.4891	11.4891	11.4891	11.4891	11.4891	11.4891	11.4891	11.4891	11.4891	11.4891	11.4891
Glycocholate	11.4891	11.4891	11.4891	11.4891	0	1			11.4891	11.4891	11.4891	11.4891	11.4891	11.4891	11.4891	11.4891	11.4891	11.4891	11.4891	11.4891	11.4891	11.4891	11.4891	11.4891
Glycolaldehyde	11.4891	11.4891	11.4891	11.4891	0	1			11.4891	11.4891	11.4891	11.4891	11.4891	11.4891	11.4891	11.4891	11.4891	11.4891	11.4891	11.4891	11.4891	11.4891	11.4891	11.4891
Guanidinoacetate	11.4891	11.4891	11.4891	11.4891	0	1			11.4891	11.4891	11.4891	11.4891	11.4891	11.4891	11.4891	11.4891	11.4891	11.4891	11.4891	11.4891	11.4891	11.4891	11.4891	11.4891
Guanidinosuccinate	11.4891	11.4891	11.4891	11.4891	0	1			11.4891	11.4891	11.4891	11.4891	11.4891	11.4891	11.4891	11.4891	11.4891	11.4891	11.4891	11.4891	11.4891	11.4891	11.4891	11.4891
Guanine	11.4891	11.4891	11.4891	11.4891	0	1			11.4891	11.4891	11.4891	11.4891	11.4891	11.4891	11.4891	11.4891	11.4891	11.4891	11.4891	11.4891	11.4891	11.4891	11.4891	11.4891
Guanosine	11.4891	11.4891	11.4891	11.4891	0	1			11.4891	11.4891	11.4891	11.4891	11.4891	11.4891	11.4891	11.4891	11.4891	11.4891	11.4891	11.4891	11.4891	11.4891	11.4891	11.4891
Guanosine diphosphate	11.4891	11.4891	11.4891	11.4891	0	1			11.4891	11.4891	11.4891	11.4891	11.4891	11.4891	11.4891	11.4891	11.4891	11.4891	11.4891	11.4891	11.4891	11.4891	11.4891	11.4891
Gulonolactone	11.4891	11.4891	11.4891	11.4891	0	1			11.4891	11.4891	11.4891	11.4891	11.4891	11.4891	11.4891	11.4891	11.4891	11.4891	11.4891	11.4891	11.4891	11.4891	11.4891	11.4891
Hexarates	11.4891	11.4891	11.4891	11.4891	0	1			11.4891	11.4891	11.4891	11.4891	11.4891	11.4891	11.4891	11.4891	11.4891	11.4891	11.4891	11.4891	11.4891	11.4891	11.4891	11.4891
Hippurate	11.4891	11.4891	11.4891	11.4891	0	1			11.4891	11.4891	11.4891	11.4891	11.4891	11.4891	11.4891	11.4891	11.4891	11.4891	11.4891	11.4891	11.4891	11.4891	11.4891	11.4891
Histamine	11.4891	11.4891	11.4891	11.4891	0	1			11.4891	11.4891	11.4891	11.4891	11.4891	11.4891	11.4891	11.4891	11.4891	11.4891	11.4891	11.4891	11.4891	11.4891	11.4891	11.4891
Histidinol	11.4891	11.4891	11.4891	11.4891	0	1			11.4891	11.4891	11.4891	11.4891	11.4891	11.4891	11.4891	11.4891	11.4891	11.4891	11.4891	11.4891	11.4891	11.4891	11.4891	11.4891
Homoarginine	11.4891	11.4891	11.4891	11.4891	0	1			11.4891	11.4891	11.4891	11.4891	11.4891	11.4891	11.4891	11.4891	11.4891	11.4891	11.4891	11.4891	11.4891	11.4891	11.4891	11.4891
Homocysteine	11.4891	11.4891	11.4891	11.4891	0	1			11.4891	11.4891	11.4891	11.4891	11.4891	11.4891	11.4891	11.4891	11.4891	11.4891	11.4891	11.4891	11.4891	11.4891	11.4891	11.4891
Homocystine	11.4891	11.4891	11.4891	11.4891	0	1			11.4891	11.4891	11.4891	11.4891	11.4891	11.4891	11.4891	11.4891	11.4891	11.4891	11.4891	11.4891	11.4891	11.4891	11.4891	11.4891
Homogentisate	11.4891	11.4891	11.4891	11.4891	0	1			11.4891	11.4891	11.4891	11.4891	11.4891	11.4891	11.4891	11.4891	11.4891	11.4891	11.4891	11.4891	11.4891	11.4891	11.4891	11.4891
Homoserine	11.4891	11.4891	11.4891	11.4891	0	1			11.4891	11.4891	11.4891	11.4891	11.4891	11.4891	11.4891	11.4891	11.4891	11.4891	11.4891	11.4891	11.4891	11.4891	11.4891	11.4891
Homovanillate	11.4891	11.4891	11.4891	11.4891	0	1			11.4891	11.4891	11.4891	11.4891	11.4891	11.4891	11.4891	11.4891	11.4891	11.4891	11.4891	11.4891	11.4891	11.4891	11.4891	11.4891
Hydroquinone	11.4891	11.4891	11.4891	11.4891	0	1			11.4891	11.4891	11.4891	11.4891	11.4891	11.4891	11.4891	11.4891	11.4891	11.4891	11.4891	11.4891	11.4891	11.4891	11.4891	11.4891
Hydroxy-FA (6:0)	11.4891	11.4891	11.4891	11.4891	0	1			11.4891	11.4891	11.4891	11.4891	11.4891	11.4891	11.4891	11.4891	11.4891	11.4891	11.4891	11.4891	11.4891	11.4891	11.4891	11.4891
Hydroxycitrate	11.4891	11.4891	11.4891	11.4891	0	1			11.4891	11.4891	11.4891	11.4891	11.4891	11.4891	11.4891	11.4891	11.4891	11.4891	11.4891	11.4891	11.4891	11.4891	11.4891	11.4891
Hydroxyphenyllactate	11.4891	11.4891	11.4891	11.4891	0	1			11.4891	11.4891	11.4891	11.4891	11.4891	11.4891	11.4891	11.4891	11.4891	11.4891	11.4891	11.4891	11.4891	11.4891	11.4891	11.4891
Indole-3-acetamide	11.4891	11.4891	11.4891	11.4891	0	1			11.4891	11.4891	11.4891	11.4891	11.4891	11.4891	11.4891	11.4891	11.4891	11.4891	11.4891	11.4891	11.4891	11.4891	11.4891	11.4891
Indole-3-acetate	11.4891	11.4891	11.4891	11.4891	0	1			11.4891	11.4891	11.4891	11.4891	11.4891	11.4891	11.4891	11.4891	11.4891	11.4891	11.4891	11.4891	11.4891	11.4891	11.4891	11.4891
Indole-3-ethanol	11.4891	11.4891	11.4891	11.4891	0	1			11.4891	11.4891	11.4891	11.4891	11.4891	11.4891	11.4891	11.4891	11.4891	11.4891	11.4891	11.4891	11.4891	11.4891	11.4891	11.4891
Indole-3-methyl acetate	11.4891	11.4891	11.4891	11.4891	0	1			11.4891	11.4891	11.4891	11.4891	11.4891	11.4891	11.4891	11.4891	11.4891	11.4891	11.4891	11.4891	11.4891	11.4891	11.4891	11.4891
Indole-3-pyruvate	11.4891	11.4891	11.4891	11.4891	0	1			11.4891	11.4891	11.4891	11.4891	11.4891	11.4891	11.4891	11.4891	11.4891	11.4891	11.4891	11.4891	11.4891	11.4891	11.4891	11.4891
Indoleacetaldehyde	11.4891	11.4891	11.4891	11.4891	0	1			11.4891	11.4891	11.4891	11.4891	11.4891	11.4891	11.4891	11.4891	11.4891	11.4891	11.4891	11.4891	11.4891	11.4891	11.4891	11.4891
Indoxyl sulfate	11.4891	11.4891	11.4891	11.4891	0	1			11.4891	11.4891	11.4891	11.4891	11.4891	11.4891	11.4891	11.4891	11.4891	11.4891	11.4891	11.4891	11.4891	11.4891	11.4891	11.4891
Inosine	11.4891	11.4891	11.4891	11.4891	0	1			11.4891	11.4891	11.4891	11.4891	11.4891	11.4891	11.4891	11.4891	11.4891	11.4891	11.4891	11.4891	11.4891	11.4891	11.4891	11.4891
Inosine diphosphate	11.4891	11.4891	11.4891	11.4891	0	1			11.4891	11.4891	11.4891	11.4891	11.4891	11.4891	11.4891	11.4891	11.4891	11.4891	11.4891	11.4891	11.4891	11.4891	11.4891	11.4891
Isopentenyl pyrophosphate	11.4891	11.4891	11.4891	11.4891	0	1			11.4891	11.4891	11.4891	11.4891	11.4891	11.4891	11.4891	11.4891	11.4891	11.4891	11.4891	11.4891	11.4891	11.4891	11.4891	11.4891
Ketoleucine	11.4891	11.4891	11.4891	11.4891	0	1			11.4891	11.4891	11.4891	11.4891	11.4891	11.4891	11.4891	11.4891	11.4891	11.4891	11.4891	11.4891	11.4891	11.4891	11.4891	11.4891
Kynurenate	11.4891	11.4891	11.4891	11.4891	0	1			11.4891	11.4891	11.4891	11.4891	11.4891	11.4891	11.4891	11.4891	11.4891	11.4891	11.4891	11.4891	11.4891	11.4891	11.4891	11.4891
Kynurenine	11.4891	11.4891	11.4891	11.4891	0	1			11.4891	11.4891	11.4891	11.4891	11.4891	11.4891	11.4891	11.4891	11.4891	11.4891	11.4891	11.4891	11.4891	11.4891	11.4891	11.4891
L-DOPA	11.4891	11.4891	11.4891	11.4891	0	1			11.4891	11.4891	11.4891	11.4891	11.4891	11.4891	11.4891	11.4891	11.4891	11.4891	11.4891	11.4891	11.4891	11.4891	11.4891	11.4891
Lactose	11.4891	11.4891	11.4891	11.4891	0	1			11.4891	11.4891	11.4891	11.4891	11.4891	11.4891	11.4891	11.4891	11.4891	11.4891	11.4891	11.4891	11.4891	11.4891	11.4891	11.4891
Leu-Val	11.4891	11.4891	11.4891	11.4891	0	1			11.4891	11.4891	11.4891	11.4891	11.4891	11.4891	11.4891	11.4891	11.4891	11.4891	11.4891	11.4891	11.4891	11.4891	11.4891	11.4891
Liothyronine	11.4891	11.4891	11.4891	11.4891	0	1			11.4891	11.4891	11.4891	11.4891	11.4891	11.4891	11.4891	11.4891	11.4891	11.4891	11.4891	11.4891	11.4891	11.4891	11.4891	11.4891
Lipoamide	11.4891	11.4891	11.4891	11.4891	0	1			11.4891	11.4891	11.4891	11.4891	11.4891	11.4891	11.4891	11.4891	11.4891	11.4891	11.4891	11.4891	11.4891	11.4891	11.4891	11.4891
Lithocholate	11.4891	11.4891	11.4891	11.4891	0	1			11.4891	11.4891	11.4891	11.4891	11.4891	11.4891	11.4891	11.4891	11.4891	11.4891	11.4891	11.4891	11.4891	11.4891	11.4891	11.4891
Lithocholyltaurine	11.4891	11.4891	11.4891	11.4891	0	1			11.4891	11.4891	11.4891	11.4891	11.4891	11.4891	11.4891	11.4891	11.4891	11.4891	11.4891	11.4891	11.4891	11.4891	11.4891	11.4891
Lyso-PC (22:4)	11.4891	11.4891	11.4891	11.4891	0	1			11.4891	11.4891	11.4891	11.4891	11.4891	11.4891	11.4891	11.4891	11.4891	11.4891	11.4891	11.4891	11.4891	11.4891	11.4891	11.4891
Lyso-PG (18:1)	11.4891	11.4891	11.4891	11.4891	0	1			11.4891	11.4891	11.4891	11.4891	11.4891	11.4891	11.4891	11.4891	11.4891	11.4891	11.4891	11.4891	11.4891	11.4891	11.4891	11.4891
Maleate	11.4891	11.4891	11.4891	11.4891	0	1			11.4891	11.4891	11.4891	11.4891	11.4891	11.4891	11.4891	11.4891	11.4891	11.4891	11.4891	11.4891	11.4891	11.4891	11.4891	11.4891
Mandelate	11.4891	11.4891	11.4891	11.4891	0	1			11.4891	11.4891	11.4891	11.4891	11.4891	11.4891	11.4891	11.4891	11.4891	11.4891	11.4891	11.4891	11.4891	11.4891	11.4891	11.4891
Mannose 6-phosphate	11.4891	11.4891	11.4891	11.4891	0	1			11.4891	11.4891	11.4891	11.4891	11.4891	11.4891	11.4891	11.4891	11.4891	11.4891	11.4891	11.4891	11.4891	11.4891	11.4891	11.4891
Melatonin	11.4891	11.4891	11.4891	11.4891	0	1			11.4891	11.4891	11.4891	11.4891	11.4891	11.4891	11.4891	11.4891	11.4891	11.4891	11.4891	11.4891	11.4891	11.4891	11.4891	11.4891
Melibiose	11.4891	11.4891	11.4891	11.4891	0	1			11.4891	11.4891	11.4891	11.4891	11.4891	11.4891	11.4891	11.4891	11.4891	11.4891	11.4891	11.4891	11.4891	11.4891	11.4891	11.4891
Mesoxalate	11.4891	11.4891	11.4891	11.4891	0	1			11.4891	11.4891	11.4891	11.4891	11.4891	11.4891	11.4891	11.4891	11.4891	11.4891	11.4891	11.4891	11.4891	11.4891	11.4891	11.4891
Met-Leu	11.4891	11.4891	11.4891	11.4891	0	1			11.4891	11.4891	11.4891	11.4891	11.4891	11.4891	11.4891	11.4891	11.4891	11.4891	11.4891	11.4891	11.4891	11.4891	11.4891	11.4891
Methionine sulfoximine	11.4891	11.4891	11.4891	11.4891	0	1			11.4891	11.4891	11.4891	11.4891	11.4891	11.4891	11.4891	11.4891	11.4891	11.4891	11.4891	11.4891	11.4891	11.4891	11.4891	11.4891
Methyglutarate	11.4891	11.4891	11.4891	11.4891	0	1			11.4891	11.4891	11.4891	11.4891	11.4891	11.4891	11.4891	11.4891	11.4891	11.4891	11.4891	11.4891	11.4891	11.4891	11.4891	11.4891
Methyl 4-aminobutyrate	11.4891	11.4891	11.4891	11.4891	0	1			11.4891	11.4891	11.4891	11.4891	11.4891	11.4891	11.4891	11.4891	11.4891	11.4891	11.4891	11.4891	11.4891	11.4891	11.4891	11.4891
Methylguanine	11.4891	11.4891	11.4891	11.4891	0	1			11.4891	11.4891	11.4891	11.4891	11.4891	11.4891	11.4891	11.4891	11.4891	11.4891	11.4891	11.4891	11.4891	11.4891	11.4891	11.4891
Methylmalonate	11.4891	11.4891	11.4891	11.4891	0	1			11.4891	11.4891	11.4891	11.4891	11.4891	11.4891	11.4891	11.4891	11.4891	11.4891	11.4891	11.4891	11.4891	11.4891	11.4891	11.4891
Mevalonate	11.4891	11.4891	11.4891	11.4891	0	1			11.4891	11.4891	11.4891	11.4891	11.4891	11.4891	11.4891	11.4891	11.4891	11.4891	11.4891	11.4891	11.4891	11.4891	11.4891	11.4891
Monoethylmalonate	11.4891	11.4891	11.4891	11.4891	0	1			11.4891	11.4891	11.4891	11.4891	11.4891	11.4891	11.4891	11.4891	11.4891	11.4891	11.4891	11.4891	11.4891	11.4891	11.4891	11.4891
Monomethylglutarate	11.4891	11.4891	11.4891	11.4891	0	1			11.4891	11.4891	11.4891	11.4891	11.4891	11.4891	11.4891	11.4891	11.4891	11.4891	11.4891	11.4891	11.4891	11.4891	11.4891	11.4891
N-Acetylalanine	11.4891	11.4891	11.4891	11.4891	0	1			11.4891	11.4891	11.4891	11.4891	11.4891	11.4891	11.4891	11.4891	11.4891	11.4891	11.4891	11.4891	11.4891	11.4891	11.4891	11.4891
N-Acetylasparagine	11.4891	11.4891	11.4891	11.4891	0	1			11.4891	11.4891	11.4891	11.4891	11.4891	11.4891	11.4891	11.4891	11.4891	11.4891	11.4891	11.4891	11.4891	11.4891	11.4891	11.4891
N-Acetylcysteine	11.4891	11.4891	11.4891	11.4891	0	1			11.4891	11.4891	11.4891	11.4891	11.4891	11.4891	11.4891	11.4891	11.4891	11.4891	11.4891	11.4891	11.4891	11.4891	11.4891	11.4891
N-Acetylglutamate	11.4891	11.4891	11.4891	11.4891	0	1			11.4891	11.4891	11.4891	11.4891	11.4891	11.4891	11.4891	11.4891	11.4891	11.4891	11.4891	11.4891	11.4891	11.4891	11.4891	11.4891
N-Acetylglycine	11.4891	11.4891	11.4891	11.4891	0	1			11.4891	11.4891	11.4891	11.4891	11.4891	11.4891	11.4891	11.4891	11.4891	11.4891	11.4891	11.4891	11.4891	11.4891	11.4891	11.4891
N-Acetylhexosamine	11.4891	11.4891	11.4891	11.4891	0	1			11.4891	11.4891	11.4891	11.4891	11.4891	11.4891	11.4891	11.4891	11.4891	11.4891	11.4891	11.4891	11.4891	11.4891	11.4891	11.4891
N-Acetylhexosamine sulfate	11.4891	11.4891	11.4891	11.4891	0	1			11.4891	11.4891	11.4891	11.4891	11.4891	11.4891	11.4891	11.4891	11.4891	11.4891	11.4891	11.4891	11.4891	11.4891	11.4891	11.4891
N-Acetylleucine	11.4891	11.4891	11.4891	11.4891	0	1			11.4891	11.4891	11.4891	11.4891	11.4891	11.4891	11.4891	11.4891	11.4891	11.4891	11.4891	11.4891	11.4891	11.4891	11.4891	11.4891
N-Acetylmethionine	15.1735	15.1735	15.1735	15.1735	0	1			15.1735	15.1735	15.1735	15.1735	15.1735	15.1735	15.1735	15.1735	15.1735	15.1735	15.1735	15.1735	15.1735	15.1735	15.1735	15.1735
N-Acetylneuraminate	11.4891	11.4891	11.4891	11.4891	0	1			11.4891	11.4891	11.4891	11.4891	11.4891	11.4891	11.4891	11.4891	11.4891	11.4891	11.4891	11.4891	11.4891	11.4891	11.4891	11.4891
N-Acetylornithine	11.4891	11.4891	11.4891	11.4891	0	1			11.4891	11.4891	11.4891	11.4891	11.4891	11.4891	11.4891	11.4891	11.4891	11.4891	11.4891	11.4891	11.4891	11.4891	11.4891	11.4891
N-Acetylphenylalanine	11.4891	11.4891	11.4891	11.4891	0	1			11.4891	11.4891	11.4891	11.4891	11.4891	11.4891	11.4891	11.4891	11.4891	11.4891	11.4891	11.4891	11.4891	11.4891	11.4891	11.4891
N-Acetylproline	11.4891	11.4891	11.4891	11.4891	0	1			11.4891	11.4891	11.4891	11.4891	11.4891	11.4891	11.4891	11.4891	11.4891	11.4891	11.4891	11.4891	11.4891	11.4891	11.4891	11.4891
N-Acetylputrescine	11.4891	11.4891	11.4891	11.4891	0	1			11.4891	11.4891	11.4891	11.4891	11.4891	11.4891	11.4891	11.4891	11.4891	11.4891	11.4891	11.4891	11.4891	11.4891	11.4891	11.4891
N-Acetylserine	11.4891	11.4891	11.4891	11.4891	0	1			11.4891	11.4891	11.4891	11.4891	11.4891	11.4891	11.4891	11.4891	11.4891	11.4891	11.4891	11.4891	11.4891	11.4891	11.4891	11.4891
N-Acetylserotonin	11.4891	11.4891	11.4891	11.4891	0	1			11.4891	11.4891	11.4891	11.4891	11.4891	11.4891	11.4891	11.4891	11.4891	11.4891	11.4891	11.4891	11.4891	11.4891	11.4891	11.4891
N-Acetyltryptophan	11.4891	11.4891	11.4891	11.4891	0	1			11.4891	11.4891	11.4891	11.4891	11.4891	11.4891	11.4891	11.4891	11.4891	11.4891	11.4891	11.4891	11.4891	11.4891	11.4891	11.4891
N-alpha-Acetyllysine	11.4891	11.4891	11.4891	11.4891	0	1			11.4891	11.4891	11.4891	11.4891	11.4891	11.4891	11.4891	11.4891	11.4891	11.4891	11.4891	11.4891	11.4891	11.4891	11.4891	11.4891
N-Methylaspartate	11.4891	11.4891	11.4891	11.4891	0	1			11.4891	11.4891	11.4891	11.4891	11.4891	11.4891	11.4891	11.4891	11.4891	11.4891	11.4891	11.4891	11.4891	11.4891	11.4891	11.4891
N-Methylglutamate	11.4891	11.4891	11.4891	11.4891	0	1			11.4891	11.4891	11.4891	11.4891	11.4891	11.4891	11.4891	11.4891	11.4891	11.4891	11.4891	11.4891	11.4891	11.4891	11.4891	11.4891
N-Methyltryptamine	11.4891	11.4891	11.4891	11.4891	0	1			11.4891	11.4891	11.4891	11.4891	11.4891	11.4891	11.4891	11.4891	11.4891	11.4891	11.4891	11.4891	11.4891	11.4891	11.4891	11.4891
N-Ribosylnicotinamide	11.4891	11.4891	11.4891	11.4891	0	1			11.4891	11.4891	11.4891	11.4891	11.4891	11.4891	11.4891	11.4891	11.4891	11.4891	11.4891	11.4891	11.4891	11.4891	11.4891	11.4891
N,N-Dimethyllysine	11.4891	11.4891	11.4891	11.4891	0	1			11.4891	11.4891	11.4891	11.4891	11.4891	11.4891	11.4891	11.4891	11.4891	11.4891	11.4891	11.4891	11.4891	11.4891	11.4891	11.4891
N6-(delta2-Isopentenyl)-adenine	11.4891	11.4891	11.4891	11.4891	0	1			11.4891	11.4891	11.4891	11.4891	11.4891	11.4891	11.4891	11.4891	11.4891	11.4891	11.4891	11.4891	11.4891	11.4891	11.4891	11.4891
Nicotinamide hypoxanthine dinucleotide	11.4891	11.4891	11.4891	11.4891	0	1			11.4891	11.4891	11.4891	11.4891	11.4891	11.4891	11.4891	11.4891	11.4891	11.4891	11.4891	11.4891	11.4891	11.4891	11.4891	11.4891
Nicotinamide mononucleotide	11.4891	11.4891	11.4891	11.4891	0	1			11.4891	11.4891	11.4891	11.4891	11.4891	11.4891	11.4891	11.4891	11.4891	11.4891	11.4891	11.4891	11.4891	11.4891	11.4891	11.4891
Nicotinate	11.4891	11.4891	11.4891	11.4891	0	1			11.4891	11.4891	11.4891	11.4891	11.4891	11.4891	11.4891	11.4891	11.4891	11.4891	11.4891	11.4891	11.4891	11.4891	11.4891	11.4891
Norleucine	11.4891	11.4891	11.4891	11.4891	0	1			11.4891	11.4891	11.4891	11.4891	11.4891	11.4891	11.4891	11.4891	11.4891	11.4891	11.4891	11.4891	11.4891	11.4891	11.4891	11.4891
Normetanephrine	11.4891	11.4891	11.4891	11.4891	0	1			11.4891	11.4891	11.4891	11.4891	11.4891	11.4891	11.4891	11.4891	11.4891	11.4891	11.4891	11.4891	11.4891	11.4891	11.4891	11.4891
Norvaline	11.4891	11.4891	11.4891	11.4891	0	1			11.4891	11.4891	11.4891	11.4891	11.4891	11.4891	11.4891	11.4891	11.4891	11.4891	11.4891	11.4891	11.4891	11.4891	11.4891	11.4891
O-Acetylserine	11.4891	11.4891	11.4891	11.4891	0	1			11.4891	11.4891	11.4891	11.4891	11.4891	11.4891	11.4891	11.4891	11.4891	11.4891	11.4891	11.4891	11.4891	11.4891	11.4891	11.4891
O-Succinyl homoserine	11.4891	11.4891	11.4891	11.4891	0	1			11.4891	11.4891	11.4891	11.4891	11.4891	11.4891	11.4891	11.4891	11.4891	11.4891	11.4891	11.4891	11.4891	11.4891	11.4891	11.4891
Octenoylglycine	11.4891	11.4891	11.4891	11.4891	0	1			11.4891	11.4891	11.4891	11.4891	11.4891	11.4891	11.4891	11.4891	11.4891	11.4891	11.4891	11.4891	11.4891	11.4891	11.4891	11.4891
Octopamine	11.4891	11.4891	11.4891	11.4891	0	1			11.4891	11.4891	11.4891	11.4891	11.4891	11.4891	11.4891	11.4891	11.4891	11.4891	11.4891	11.4891	11.4891	11.4891	11.4891	11.4891
Orotate	11.4891	11.4891	11.4891	11.4891	0	1			11.4891	11.4891	11.4891	11.4891	11.4891	11.4891	11.4891	11.4891	11.4891	11.4891	11.4891	11.4891	11.4891	11.4891	11.4891	11.4891
Oxoadipate	11.4891	11.4891	11.4891	11.4891	0	1			11.4891	11.4891	11.4891	11.4891	11.4891	11.4891	11.4891	11.4891	11.4891	11.4891	11.4891	11.4891	11.4891	11.4891	11.4891	11.4891
Oxoproline	11.4891	11.4891	11.4891	11.4891	0	1			11.4891	11.4891	11.4891	11.4891	11.4891	11.4891	11.4891	11.4891	11.4891	11.4891	11.4891	11.4891	11.4891	11.4891	11.4891	11.4891
p-Hydroxyphenylacetate	11.4891	11.4891	11.4891	11.4891	0	1			11.4891	11.4891	11.4891	11.4891	11.4891	11.4891	11.4891	11.4891	11.4891	11.4891	11.4891	11.4891	11.4891	11.4891	11.4891	11.4891
PC (20:0)	11.4891	11.4891	11.4891	11.4891	0	1			11.4891	11.4891	11.4891	11.4891	11.4891	11.4891	11.4891	11.4891	11.4891	11.4891	11.4891	11.4891	11.4891	11.4891	11.4891	11.4891
PC (44:8)	15.5522	15.5522	15.6463	15.6463	0.0941178	1.06741			15.4272	15.4272	15.4272	15.4272	15.4272	15.4272	15.4272	16.4272	15.4272	17.1801	15.4272	15.4272	15.4272	15.4272	15.4272	15.4272
PE (36:6)	11.4891	11.4891	11.4891	11.4891	0	1			11.4891	11.4891	11.4891	11.4891	11.4891	11.4891	11.4891	11.4891	11.4891	11.4891	11.4891	11.4891	11.4891	11.4891	11.4891	11.4891
Pentanoate	11.4891	11.4891	11.4891	11.4891	0	1			11.4891	11.4891	11.4891	11.4891	11.4891	11.4891	11.4891	11.4891	11.4891	11.4891	11.4891	11.4891	11.4891	11.4891	11.4891	11.4891
Pentitols	11.4891	11.4891	11.4891	11.4891	0	1			11.4891	11.4891	11.4891	11.4891	11.4891	11.4891	11.4891	11.4891	11.4891	11.4891	11.4891	11.4891	11.4891	11.4891	11.4891	11.4891
Phenethylamine	11.4891	11.4891	11.4891	11.4891	0	1			11.4891	11.4891	11.4891	11.4891	11.4891	11.4891	11.4891	11.4891	11.4891	11.4891	11.4891	11.4891	11.4891	11.4891	11.4891	11.4891
Phenylacetate	11.4891	11.4891	11.4891	11.4891	0	1			11.4891	11.4891	11.4891	11.4891	11.4891	11.4891	11.4891	11.4891	11.4891	11.4891	11.4891	11.4891	11.4891	11.4891	11.4891	11.4891
Phenylethanolamine	11.4891	11.4891	11.4891	11.4891	0	1			11.4891	11.4891	11.4891	11.4891	11.4891	11.4891	11.4891	11.4891	11.4891	11.4891	11.4891	11.4891	11.4891	11.4891	11.4891	11.4891
Phenylpyruvate	11.4891	11.4891	11.4891	11.4891	0	1			11.4891	11.4891	11.4891	11.4891	11.4891	11.4891	11.4891	11.4891	11.4891	11.4891	11.4891	11.4891	11.4891	11.4891	11.4891	11.4891
Phosphoenolpyruvate	12.4829	12.4829	12.388	12.388	-0.0949928	0.936277			12.2432	12.2432	12.2432	12.2432	14.1614	12.2432	12.2432	12.2432	12.2432	12.2432	12.2432	12.2432	12.2432	12.2432	12.2432	13.4015
Phosphonoacetate	11.4891	11.4891	11.4891	11.4891	0	1			11.4891	11.4891	11.4891	11.4891	11.4891	11.4891	11.4891	11.4891	11.4891	11.4891	11.4891	11.4891	11.4891	11.4891	11.4891	11.4891
Pipecolate	11.4891	11.4891	11.4891	11.4891	0	1			11.4891	11.4891	11.4891	11.4891	11.4891	11.4891	11.4891	11.4891	11.4891	11.4891	11.4891	11.4891	11.4891	11.4891	11.4891	11.4891
Pregnenolone sulfate	11.4891	11.4891	11.4891	11.4891	0	1			11.4891	11.4891	11.4891	11.4891	11.4891	11.4891	11.4891	11.4891	11.4891	11.4891	11.4891	11.4891	11.4891	11.4891	11.4891	11.4891
Propionyl-CoA	11.4891	11.4891	11.4891	11.4891	0	1			11.4891	11.4891	11.4891	11.4891	11.4891	11.4891	11.4891	11.4891	11.4891	11.4891	11.4891	11.4891	11.4891	11.4891	11.4891	11.4891
Psicose	11.4891	11.4891	11.4891	11.4891	0	1			11.4891	11.4891	11.4891	11.4891	11.4891	11.4891	11.4891	11.4891	11.4891	11.4891	11.4891	11.4891	11.4891	11.4891	11.4891	11.4891
Purine	11.4891	11.4891	11.4891	11.4891	0	1			11.4891	11.4891	11.4891	11.4891	11.4891	11.4891	11.4891	11.4891	11.4891	11.4891	11.4891	11.4891	11.4891	11.4891	11.4891	11.4891
Pyridoxal	11.4891	11.4891	11.4891	11.4891	0	1			11.4891	11.4891	11.4891	11.4891	11.4891	11.4891	11.4891	11.4891	11.4891	11.4891	11.4891	11.4891	11.4891	11.4891	11.4891	11.4891
Pyridoxal phosphate	11.4891	11.4891	11.4891	11.4891	0	1			11.4891	11.4891	11.4891	11.4891	11.4891	11.4891	11.4891	11.4891	11.4891	11.4891	11.4891	11.4891	11.4891	11.4891	11.4891	11.4891
Pyridoxamine	11.4891	11.4891	11.4891	11.4891	0	1			11.4891	11.4891	11.4891	11.4891	11.4891	11.4891	11.4891	11.4891	11.4891	11.4891	11.4891	11.4891	11.4891	11.4891	11.4891	11.4891
Pyridoxine	15.2031	15.2031	15.2031	15.2031	0	1			15.2031	15.2031	15.2031	15.2031	15.2031	15.2031	15.2031	15.2031	15.2031	15.2031	15.2031	15.2031	15.2031	15.2031	15.2031	15.2031
Pyrocatechol	11.4891	11.4891	11.4891	11.4891	0	1			11.4891	11.4891	11.4891	11.4891	11.4891	11.4891	11.4891	11.4891	11.4891	11.4891	11.4891	11.4891	11.4891	11.4891	11.4891	11.4891
Pyroglutamate	11.4891	11.4891	11.4891	11.4891	0	1			11.4891	11.4891	11.4891	11.4891	11.4891	11.4891	11.4891	11.4891	11.4891	11.4891	11.4891	11.4891	11.4891	11.4891	11.4891	11.4891
Pyrrole 2-carboxylate	11.4891	11.4891	11.4891	11.4891	0	1			11.4891	11.4891	11.4891	11.4891	11.4891	11.4891	11.4891	11.4891	11.4891	11.4891	11.4891	11.4891	11.4891	11.4891	11.4891	11.4891
Pyruvate	11.4891	11.4891	11.4891	11.4891	0	1			11.4891	11.4891	11.4891	11.4891	11.4891	11.4891	11.4891	11.4891	11.4891	11.4891	11.4891	11.4891	11.4891	11.4891	11.4891	11.4891
Quinate	11.4891	11.4891	11.4891	11.4891	0	1			11.4891	11.4891	11.4891	11.4891	11.4891	11.4891	11.4891	11.4891	11.4891	11.4891	11.4891	11.4891	11.4891	11.4891	11.4891	11.4891
Quinoline	11.4891	11.4891	11.4891	11.4891	0	1			11.4891	11.4891	11.4891	11.4891	11.4891	11.4891	11.4891	11.4891	11.4891	11.4891	11.4891	11.4891	11.4891	11.4891	11.4891	11.4891
Raffinose	11.4891	11.4891	11.4891	11.4891	0	1			11.4891	11.4891	11.4891	11.4891	11.4891	11.4891	11.4891	11.4891	11.4891	11.4891	11.4891	11.4891	11.4891	11.4891	11.4891	11.4891
Riboflavin	11.4891	11.4891	11.4891	11.4891	0	1			11.4891	11.4891	11.4891	11.4891	11.4891	11.4891	11.4891	11.4891	11.4891	11.4891	11.4891	11.4891	11.4891	11.4891	11.4891	11.4891
Rosmarinate	11.4891	11.4891	11.4891	11.4891	0	1			11.4891	11.4891	11.4891	11.4891	11.4891	11.4891	11.4891	11.4891	11.4891	11.4891	11.4891	11.4891	11.4891	11.4891	11.4891	11.4891
S-Acetylthioethanolamine	11.4891	11.4891	11.4891	11.4891	0	1			11.4891	11.4891	11.4891	11.4891	11.4891	11.4891	11.4891	11.4891	11.4891	11.4891	11.4891	11.4891	11.4891	11.4891	11.4891	11.4891
S-Carboxymethylcysteine	11.4891	11.4891	11.4891	11.4891	0	1			11.4891	11.4891	11.4891	11.4891	11.4891	11.4891	11.4891	11.4891	11.4891	11.4891	11.4891	11.4891	11.4891	11.4891	11.4891	11.4891
S-Hexyl glutathione	11.4891	11.4891	11.4891	11.4891	0	1			11.4891	11.4891	11.4891	11.4891	11.4891	11.4891	11.4891	11.4891	11.4891	11.4891	11.4891	11.4891	11.4891	11.4891	11.4891	11.4891
SAICAR	11.4891	11.4891	11.4891	11.4891	0	1			11.4891	11.4891	11.4891	11.4891	11.4891	11.4891	11.4891	11.4891	11.4891	11.4891	11.4891	11.4891	11.4891	11.4891	11.4891	11.4891
Salicylamide	11.4891	11.4891	11.4891	11.4891	0	1			11.4891	11.4891	11.4891	11.4891	11.4891	11.4891	11.4891	11.4891	11.4891	11.4891	11.4891	11.4891	11.4891	11.4891	11.4891	11.4891
Salsolinol	11.4891	11.4891	11.4891	11.4891	0	1			11.4891	11.4891	11.4891	11.4891	11.4891	11.4891	11.4891	11.4891	11.4891	11.4891	11.4891	11.4891	11.4891	11.4891	11.4891	11.4891
Sarcosine	11.4891	11.4891	11.4891	11.4891	0	1			11.4891	11.4891	11.4891	11.4891	11.4891	11.4891	11.4891	11.4891	11.4891	11.4891	11.4891	11.4891	11.4891	11.4891	11.4891	11.4891
Sebacate	11.4891	11.4891	11.4891	11.4891	0	1			11.4891	11.4891	11.4891	11.4891	11.4891	11.4891	11.4891	11.4891	11.4891	11.4891	11.4891	11.4891	11.4891	11.4891	11.4891	11.4891
Selenomethionine	11.4891	11.4891	11.4891	11.4891	0	1			11.4891	11.4891	11.4891	11.4891	11.4891	11.4891	11.4891	11.4891	11.4891	11.4891	11.4891	11.4891	11.4891	11.4891	11.4891	11.4891
Ser-Arg	11.4891	11.4891	11.4891	11.4891	0	1			11.4891	11.4891	11.4891	11.4891	11.4891	11.4891	11.4891	11.4891	11.4891	11.4891	11.4891	11.4891	11.4891	11.4891	11.4891	11.4891
Serotonin	11.4891	11.4891	11.4891	11.4891	0	1			11.4891	11.4891	11.4891	11.4891	11.4891	11.4891	11.4891	11.4891	11.4891	11.4891	11.4891	11.4891	11.4891	11.4891	11.4891	11.4891
Shikimate	11.4891	11.4891	11.4891	11.4891	0	1			11.4891	11.4891	11.4891	11.4891	11.4891	11.4891	11.4891	11.4891	11.4891	11.4891	11.4891	11.4891	11.4891	11.4891	11.4891	11.4891
Sphingosine	11.4891	11.4891	11.4891	11.4891	0	1			11.4891	11.4891	11.4891	11.4891	11.4891	11.4891	11.4891	11.4891	11.4891	11.4891	11.4891	11.4891	11.4891	11.4891	11.4891	11.4891
Stachydrine	11.4891	11.4891	11.4891	11.4891	0	1			11.4891	11.4891	11.4891	11.4891	11.4891	11.4891	11.4891	11.4891	11.4891	11.4891	11.4891	11.4891	11.4891	11.4891	11.4891	11.4891
Stachyose	11.4891	11.4891	11.4891	11.4891	0	1			11.4891	11.4891	11.4891	11.4891	11.4891	11.4891	11.4891	11.4891	11.4891	11.4891	11.4891	11.4891	11.4891	11.4891	11.4891	11.4891
Succinyl-CoA	11.4891	11.4891	11.4891	11.4891	0	1			11.4891	11.4891	11.4891	11.4891	11.4891	11.4891	11.4891	11.4891	11.4891	11.4891	11.4891	11.4891	11.4891	11.4891	11.4891	11.4891
Sucrose	11.4891	11.4891	11.4891	11.4891	0	1			11.4891	11.4891	11.4891	11.4891	11.4891	11.4891	11.4891	11.4891	11.4891	11.4891	11.4891	11.4891	11.4891	11.4891	11.4891	11.4891
Tartrate	11.4891	11.4891	11.4891	11.4891	0	1			11.4891	11.4891	11.4891	11.4891	11.4891	11.4891	11.4891	11.4891	11.4891	11.4891	11.4891	11.4891	11.4891	11.4891	11.4891	11.4891
Taurocyamine	11.4891	11.4891	11.4891	11.4891	0	1			11.4891	11.4891	11.4891	11.4891	11.4891	11.4891	11.4891	11.4891	11.4891	11.4891	11.4891	11.4891	11.4891	11.4891	11.4891	11.4891
Theophylline	11.4891	11.4891	11.4891	11.4891	0	1			11.4891	11.4891	11.4891	11.4891	11.4891	11.4891	11.4891	11.4891	11.4891	11.4891	11.4891	11.4891	11.4891	11.4891	11.4891	11.4891
Thiamine	14.0391	14.0391	14.1641	14.1641	0.125	1.09051			14.0391	14.0391	14.0391	14.0391	14.0391	14.0391	14.0391	14.0391	15.0391	14.0391	14.0391	14.0391	14.0391	14.0391	14.0391	14.0391
Thioproline	11.4891	11.4891	11.4891	11.4891	0	1			11.4891	11.4891	11.4891	11.4891	11.4891	11.4891	11.4891	11.4891	11.4891	11.4891	11.4891	11.4891	11.4891	11.4891	11.4891	11.4891
Thiopurine S-methylether	11.4891	11.4891	11.4891	11.4891	0	1			11.4891	11.4891	11.4891	11.4891	11.4891	11.4891	11.4891	11.4891	11.4891	11.4891	11.4891	11.4891	11.4891	11.4891	11.4891	11.4891
Thr-Arg	11.4891	11.4891	11.4891	11.4891	0	1			11.4891	11.4891	11.4891	11.4891	11.4891	11.4891	11.4891	11.4891	11.4891	11.4891	11.4891	11.4891	11.4891	11.4891	11.4891	11.4891
Threonate	11.4891	11.4891	11.4891	11.4891	0	1			11.4891	11.4891	11.4891	11.4891	11.4891	11.4891	11.4891	11.4891	11.4891	11.4891	11.4891	11.4891	11.4891	11.4891	11.4891	11.4891
Threonine	11.4891	11.4891	11.4891	11.4891	0	1			11.4891	11.4891	11.4891	11.4891	11.4891	11.4891	11.4891	11.4891	11.4891	11.4891	11.4891	11.4891	11.4891	11.4891	11.4891	11.4891
Thymidine	11.4891	11.4891	11.4891	11.4891	0	1			11.4891	11.4891	11.4891	11.4891	11.4891	11.4891	11.4891	11.4891	11.4891	11.4891	11.4891	11.4891	11.4891	11.4891	11.4891	11.4891
Thymidine monophosphate	11.4891	11.4891	11.4891	11.4891	0	1			11.4891	11.4891	11.4891	11.4891	11.4891	11.4891	11.4891	11.4891	11.4891	11.4891	11.4891	11.4891	11.4891	11.4891	11.4891	11.4891
Thymine	11.4891	11.4891	11.4891	11.4891	0	1			11.4891	11.4891	11.4891	11.4891	11.4891	11.4891	11.4891	11.4891	11.4891	11.4891	11.4891	11.4891	11.4891	11.4891	11.4891	11.4891
Thyrotropin releasing hormone	11.4891	11.4891	11.4891	11.4891	0	1			11.4891	11.4891	11.4891	11.4891	11.4891	11.4891	11.4891	11.4891	11.4891	11.4891	11.4891	11.4891	11.4891	11.4891	11.4891	11.4891
Trehalose	11.4891	11.4891	11.4891	11.4891	0	1			11.4891	11.4891	11.4891	11.4891	11.4891	11.4891	11.4891	11.4891	11.4891	11.4891	11.4891	11.4891	11.4891	11.4891	11.4891	11.4891
Trimethylamine	11.4891	11.4891	11.4891	11.4891	0	1			11.4891	11.4891	11.4891	11.4891	11.4891	11.4891	11.4891	11.4891	11.4891	11.4891	11.4891	11.4891	11.4891	11.4891	11.4891	11.4891
Tryptamine	11.4891	11.4891	11.4891	11.4891	0	1			11.4891	11.4891	11.4891	11.4891	11.4891	11.4891	11.4891	11.4891	11.4891	11.4891	11.4891	11.4891	11.4891	11.4891	11.4891	11.4891
Tryptophanamide	11.4891	11.4891	11.4891	11.4891	0	1			11.4891	11.4891	11.4891	11.4891	11.4891	11.4891	11.4891	11.4891	11.4891	11.4891	11.4891	11.4891	11.4891	11.4891	11.4891	11.4891
Tyr-Arg	11.4891	11.4891	11.4891	11.4891	0	1			11.4891	11.4891	11.4891	11.4891	11.4891	11.4891	11.4891	11.4891	11.4891	11.4891	11.4891	11.4891	11.4891	11.4891	11.4891	11.4891
Tyramine	11.4891	11.4891	11.4891	11.4891	0	1			11.4891	11.4891	11.4891	11.4891	11.4891	11.4891	11.4891	11.4891	11.4891	11.4891	11.4891	11.4891	11.4891	11.4891	11.4891	11.4891
Uracil	11.4891	11.4891	11.4891	11.4891	0	1			11.4891	11.4891	11.4891	11.4891	11.4891	11.4891	11.4891	11.4891	11.4891	11.4891	11.4891	11.4891	11.4891	11.4891	11.4891	11.4891
Uracil 5-carboxylate	11.4891	11.4891	11.4891	11.4891	0	1			11.4891	11.4891	11.4891	11.4891	11.4891	11.4891	11.4891	11.4891	11.4891	11.4891	11.4891	11.4891	11.4891	11.4891	11.4891	11.4891
Urate	11.4891	11.4891	11.4891	11.4891	0	1			11.4891	11.4891	11.4891	11.4891	11.4891	11.4891	11.4891	11.4891	11.4891	11.4891	11.4891	11.4891	11.4891	11.4891	11.4891	11.4891
Urea	11.4891	11.4891	11.4891	11.4891	0	1			11.4891	11.4891	11.4891	11.4891	11.4891	11.4891	11.4891	11.4891	11.4891	11.4891	11.4891	11.4891	11.4891	11.4891	11.4891	11.4891
Ureidopropionate	11.4891	11.4891	11.4891	11.4891	0	1			11.4891	11.4891	11.4891	11.4891	11.4891	11.4891	11.4891	11.4891	11.4891	11.4891	11.4891	11.4891	11.4891	11.4891	11.4891	11.4891
Uridine triphosphate	11.4891	11.4891	11.4891	11.4891	0	1			11.4891	11.4891	11.4891	11.4891	11.4891	11.4891	11.4891	11.4891	11.4891	11.4891	11.4891	11.4891	11.4891	11.4891	11.4891	11.4891
Ursodeoxycholate	11.4891	11.4891	11.4891	11.4891	0	1			11.4891	11.4891	11.4891	11.4891	11.4891	11.4891	11.4891	11.4891	11.4891	11.4891	11.4891	11.4891	11.4891	11.4891	11.4891	11.4891
Val-Phe	11.4891	11.4891	11.4891	11.4891	0	1			11.4891	11.4891	11.4891	11.4891	11.4891	11.4891	11.4891	11.4891	11.4891	11.4891	11.4891	11.4891	11.4891	11.4891	11.4891	11.4891
Valine	11.4891	11.4891	11.4891	11.4891	0	1			11.4891	11.4891	11.4891	11.4891	11.4891	11.4891	11.4891	11.4891	11.4891	11.4891	11.4891	11.4891	11.4891	11.4891	11.4891	11.4891
Xanthosine	11.4891	11.4891	11.4891	11.4891	0	1			11.4891	11.4891	11.4891	11.4891	11.4891	11.4891	11.4891	11.4891	11.4891	11.4891	11.4891	11.4891	11.4891	11.4891	11.4891	11.4891
Xanthosine monophosphate	11.4891	11.4891	11.4891	11.4891	0	1			11.4891	11.4891	11.4891	11.4891	11.4891	11.4891	11.4891	11.4891	11.4891	11.4891	11.4891	11.4891	11.4891	11.4891	11.4891	11.4891
Xanthurenate	11.4891	11.4891	11.4891	11.4891	0	1			11.4891	11.4891	11.4891	11.4891	11.4891	11.4891	11.4891	11.4891	11.4891	11.4891	11.4891	11.4891	11.4891	11.4891	11.4891	11.4891

## Sheet: ALL_Pipetted_vs_ALL_Sorted
Metabolite	ALL_Pipetted_log2_Mean	ALL_Pipetted_log2_Adjusted_Mean	TALLS_log2_Mean	TALLS_log2_Adjusted_Mean	Log2 Fold Change (ALL_Sorted / ALL_Pipetted)	Fold Change (ALL_Sorted / ALL_Pipetted)	P	FDR	ALL_Pipetted_1	ALL_Pipetted_2	ALL_Pipetted_3	ALL_Pipetted_4	ALL_Pipetted_5	ALL_Pipetted_6	ALL_Pipetted_7	ALL_Pipetted_8	ALL_Sorted_1	ALL_Sorted_2	ALL_Sorted_3	ALL_Sorted_4	ALL_Sorted_5	ALL_Sorted_6	ALL_Sorted_7	ALL_Sorted_8
Lyso-PC (18:1)	22.0843	22.0843	21.0629	21.0629	-1.02141	0.492635	6.1835e-14	1.348e-11	22.5597	22.156	22.2828	22.1997	21.8757	21.9805	22.0475	21.5723	21.5434	21.3088	21.1369	20.9393	21.0507	20.8398	20.9614	20.7228
Lyso-PC (18:0)	23.7262	23.7262	22.9931	22.9931	-0.733113	0.601604	4.27637e-12	3.1075e-10	24.0571	23.8444	23.8328	23.7126	23.53	23.7467	23.6871	23.3988	23.2992	23.1963	22.991	22.9573	22.9757	22.8172	22.8919	22.8161
Platelet-activating factor	23.7262	23.7262	22.9931	22.9931	-0.733113	0.601604	4.27637e-12	3.1075e-10	24.0571	23.8444	23.8328	23.7126	23.53	23.7467	23.6871	23.3988	23.2992	23.1963	22.991	22.9573	22.9757	22.8172	22.8919	22.8161
Arginine	27.2116	27.2116	26.7133	26.7133	-0.498371	0.707905	1.05761e-10	5.764e-09	27.1768	27.2323	27.1234	27.038	27.1607	27.2103	27.3035	27.4481	26.6517	26.6483	26.6022	26.7783	26.6897	26.8277	26.7187	26.7896
Pyridoxine	19.0363	19.0363	15.9042	15.9042	-3.13208	0.114064	1.796e-10	7.83055e-09	19.4792	18.8262	19.6177	19.0151	18.6462	19.4224	18.9111	18.3726	15.2031	15.2031	17.6939	17.3215	16.2031	15.2031	15.2031	15.2031
Glycerophosphocholine	25.9559	25.9559	25.3271	25.3271	-0.628806	0.646712	1.39668e-09	5.07461e-08	25.6405	25.9352	25.8667	25.8078	25.8769	25.8983	26.1168	26.505	24.9832	25.2814	25.3772	25.4231	25.3124	25.4131	25.446	25.3803
Carnitine (16:0)	21.4607	21.4607	20.4012	20.4012	-1.05945	0.479813	5.41433e-09	1.61515e-07	21.7169	21.8174	21.4708	21.1843	21.376	21.5587	21.4745	21.0867	20.8403	21.0369	20.2468	20.6093	20.5893	20.3606	19.9935	19.533
Lyso-PC (16:0)	23.0578	23.0578	22.432	22.432	-0.625845	0.64804	5.92715e-09	1.61515e-07	23.4206	23.4695	23.0887	22.9357	22.7787	23.0108	23.0561	22.7025	22.8667	22.9279	22.5104	22.303	22.3945	22.2593	22.0598	22.1343
Glutamine	28.544	28.544	28.1942	28.1942	-0.34982	0.784682	3.0008e-08	7.2686e-07	28.4858	28.5596	28.5844	28.5224	28.5684	28.4823	28.6515	28.4977	28.038	28.21	28.2717	28.3504	28.1673	28.3097	28.1075	28.0992
UDP-glucose	24.6943	24.6943	24.0668	24.0668	-0.627529	0.647284	3.44568e-08	7.51158e-07	24.5886	24.7146	24.6382	24.4509	24.6387	24.5865	24.7224	25.2149	23.8331	23.9874	23.9802	24.154	24.1759	24.1249	24.154	24.1248
P-DMEA	22.4206	22.4206	22.0065	22.0065	-0.41404	0.750519	4.2937e-08	8.50933e-07	22.3518	22.3404	22.3774	22.2714	22.4822	22.3622	22.4814	22.6976	21.9069	21.8361	21.8713	22.2209	22.0264	22.0531	21.9975	22.1399
Adenosine monophosphate	20.273	20.273	21.5391	21.5391	1.26609	2.40509	9.49035e-08	1.72408e-06	20.4831	20.2961	20.4918	19.9798	20.3454	20.0956	20.3091	20.1827	21.3813	22.0884	21.6988	21.5978	21.6465	21.4414	21.2039	21.2543
Inosine monophosphate	14.1272	14.1272	17.4911	17.4911	3.36396	10.2956	1.08811e-07	1.82468e-06	13.8154	13.8154	13.8154	13.8154	14.8154	13.8154	13.8154	15.3098	18.2541	18.9998	17.3886	18.082	16.264	16.888	17.4449	16.6076
ADP-ribose	19.8567	19.8567	17.3271	17.3271	-2.52956	0.173192	1.28052e-07	1.99395e-06	19.6065	20.1565	19.5393	19.5951	19.9485	19.7801	19.8945	20.3328	17.5701	16.8013	17.8566	16.5952	18.0346	17.6542	15.7315	18.3735
Glycerophosphoethanolamine	23.5665	23.5665	23.2342	23.2342	-0.332266	0.794288	3.5537e-07	5.16471e-06	23.4595	23.5714	23.5591	23.4528	23.5301	23.4987	23.6466	23.8138	23.1378	23.2063	23.2573	23.3564	23.2409	23.3004	23.1835	23.191
Sphinganine	23.2194	23.2194	23.4909	23.4909	0.271443	1.20701	4.32206e-07	5.88881e-06	23.2055	23.29	23.2334	23.2388	23.2296	23.3223	23.2387	22.9972	23.4278	23.6398	23.5342	23.597	23.5174	23.4047	23.4458	23.3604
PC (40:6)	26.2829	26.2829	25.9886	25.9886	-0.294376	0.815425	5.05444e-07	6.48158e-06	26.3714	26.2786	26.3708	26.2765	26.1562	26.3437	26.3003	26.166	25.9935	26.1078	26.0392	26.0325	25.9884	25.8583	26.0335	25.8553
Isoleucine	22.1926	22.1926	21.752	21.752	-0.440581	0.736838	6.37214e-07	7.71737e-06	22.2438	22.3507	22.1882	22.0718	22.2553	22.2461	22.2968	21.8882	21.8628	21.6314	21.6237	21.8522	21.7786	21.7217	21.8536	21.6923
Uridine diphosphate	19.8591	19.8591	20.6076	20.6076	0.748496	1.68004	9.37352e-07	1.07549e-05	19.6628	19.791	19.9697	19.4848	19.8473	19.6997	20.0124	20.4052	20.2748	20.5703	20.6655	20.7486	20.6296	20.6289	20.5114	20.8318
trans-Aconitate	18.517	18.517	17.7582	17.7582	-0.758778	0.590997	9.93139e-07	1.08252e-05	18.4217	18.6738	18.5566	18.0377	18.6474	18.5038	18.552	18.7429	18.2449	17.1078	17.8368	17.4176	17.6361	17.9749	17.6575	18.1902
Fructose 6-phosphate	14.8686	14.8686	13.4684	13.4684	-1.40025	0.378864	1.09355e-06	1.08361e-05	14.3457	15.0493	14.1435	15.5506	15.7479	14.6287	14.9426	14.5409	13.1183	13.1183	13.1183	13.1183	14.1183	13.1183	13.1183	14.9193
Galactose 1-phosphate	14.8686	14.8686	13.4684	13.4684	-1.40025	0.378864	1.09355e-06	1.08361e-05	14.3457	15.0493	14.1435	15.5506	15.7479	14.6287	14.9426	14.5409	13.1183	13.1183	13.1183	13.1183	14.1183	13.1183	13.1183	14.9193
Malate	25.3658	25.3658	24.6151	24.6151	-0.750674	0.594326	1.16347e-06	1.10276e-05	25.236	25.3797	25.2771	25.1635	25.3091	25.2544	25.3836	25.923	25.0963	24.62	24.4611	24.8341	24.6369	24.3447	24.5719	24.356
Glutamate	28.1168	28.1168	27.7664	27.7664	-0.350337	0.784401	1.59224e-06	1.44629e-05	27.9941	28.1817	28.1673	27.9802	28.1109	28.0332	28.1403	28.3265	27.5571	27.6927	27.778	27.9144	27.8317	27.8117	27.7197	27.8262
Glycerophosphoinositol	19.8623	19.8623	19.3711	19.3711	-0.491187	0.711439	2.8766e-06	2.4295e-05	19.6673	19.849	19.6671	19.5287	19.9102	19.9479	19.9237	20.4044	19.1097	19.3945	19.1035	19.4525	19.5078	19.57	19.3796	19.451
UDP-N-acetylglucosamine	23.0013	23.0013	22.5023	22.5023	-0.498973	0.70761	2.89757e-06	2.4295e-05	22.924	22.9796	22.9702	22.75	22.9808	22.8634	23.0558	23.4862	22.3133	22.4614	22.4941	22.6193	22.5619	22.5387	22.4915	22.5383
Methionine	19.7738	19.7738	19.1039	19.1039	-0.669869	0.628564	3.0573e-06	2.46848e-05	19.9086	19.9429	19.8928	19.705	19.7159	19.6681	19.7378	19.6193	18.6187	19.2328	18.9579	19.2967	18.9515	19.6067	19.1311	19.0361
Aspartate	26.245	26.245	25.9445	25.9445	-0.300557	0.811939	3.32495e-06	2.58871e-05	26.0536	26.251	26.342	26.0686	26.3181	26.1759	26.3211	26.43	25.7958	25.8255	25.8907	26.1039	25.9707	26.1207	25.8825	25.9662
Adenosine diphosphate	22.5246	22.5246	23.0842	23.0842	0.55954	1.4738	4.23406e-06	3.18285e-05	22.4813	22.4987	22.3996	22.3394	22.6512	22.3863	22.4837	22.9569	22.7739	23.2035	23.2668	23.2177	23.1901	23.0827	22.9051	23.0337
Lyso-PC (17:0)	18.1787	18.1787	16.5026	16.5026	-1.67612	0.312923	4.54727e-06	3.30435e-05	18.8303	18.7514	18.5731	18.6403	18.3218	17.4987	17.8645	16.9497	17.4183	16.9848	16.959	17.8453	15.9285	14.6646	15.6646	16.5558
Phosphorylcholine	28.0066	28.0066	27.5988	27.5988	-0.407758	0.753794	4.89648e-06	3.44333e-05	27.9035	28.0777	28.1768	27.8862	28.0443	27.9818	28.1054	27.8769	27.4154	27.4787	27.5193	27.6916	27.7575	27.6507	27.5392	27.7381
PC (36:4)	27.6973	27.6973	27.4604	27.4604	-0.236928	0.84855	5.36035e-06	3.65174e-05	27.7536	27.6703	27.7641	27.7083	27.6021	27.7597	27.7066	27.6139	27.4762	27.5678	27.5176	27.5076	27.4915	27.2988	27.488	27.3356
Phosphoserine	17.6404	17.6404	15.6411	15.6411	-1.99929	0.250123	5.73782e-06	3.79044e-05	17.71	17.8192	17.6185	16.9722	18.213	16.7276	18.6049	17.4574	14.4279	15.6673	15.9753	14.4279	15.4279	17.3777	15.4845	16.3401
1-Phenylethanol	25.0451	25.0451	25.5466	25.5466	0.50146	1.41565	6.08771e-06	3.86896e-05	25.2044	24.8672	24.9903	25.1512	25.0042	25.0966	25.0477	24.9996	25.7633	25.3715	25.6118	25.3446	25.2367	25.3765	25.9366	25.7319
PC (38:4)	27.365	27.365	27.1246	27.1246	-0.240415	0.846502	6.21163e-06	3.86896e-05	27.4795	27.3443	27.427	27.3739	27.2869	27.4698	27.3849	27.1541	27.1864	27.2143	27.1658	27.1527	27.1287	26.9685	27.1475	27.033
Lyso-PE (18:0)	20.5481	20.5481	20.2277	20.2277	-0.320384	0.800857	7.57128e-06	4.58483e-05	20.6039	20.7044	20.5829	20.4841	20.5068	20.7252	20.5541	20.2233	20.466	20.2105	20.3786	20.0739	20.2392	20.1398	20.1039	20.2097
Hypoxanthine	16.9992	16.9992	19.274	19.274	2.27482	4.83938	1.04568e-05	5.99889e-05	16.9488	16.6047	17.096	15.0319	16.0319	17.9844	18.2755	18.0203	17.1772	19.3892	20.0765	19.7574	19.7518	19.8162	18.1881	20.0358
PC (38:5)	28.1185	28.1185	27.8841	27.8841	-0.234398	0.850039	1.02959e-05	5.99889e-05	28.2372	28.0546	28.2132	28.1086	28.0575	28.1897	28.116	27.9715	27.8974	27.9877	27.9288	27.9407	27.8808	27.7308	27.9633	27.7436
Hydroxy-FA (8:0)	21.8156	21.8156	22.2087	22.2087	0.393155	1.31326	1.35625e-05	7.58112e-05	21.9504	21.7699	21.8898	21.9311	21.763	21.7536	21.6908	21.776	22.3806	22.1409	22.2883	22.1486	22.0583	22.2221	22.0835	22.3477
Adenosine triphosphate	22.4221	22.4221	21.7535	21.7535	-0.668655	0.629093	1.61371e-05	8.79473e-05	22.43	22.2507	22.2813	22.1352	22.2871	22.2936	22.83	22.8691	21.0484	21.3057	21.8076	21.7402	21.9203	22.0203	22.0901	22.0952
Adenosine diphosphate ribose	19.142	19.142	17.3659	17.3659	-1.77611	0.291969	1.66289e-05	8.84173e-05	18.7431	19.1342	19.1448	18.7033	19.2048	19.2091	19.3459	19.6507	17.1641	17.0311	17.9152	16.6414	17.2397	17.5963	17.4417	17.8972
N,N-Dimethylarginine	19.8884	19.8884	19.1521	19.1521	-0.736338	0.600261	1.82193e-05	9.45667e-05	20.0199	19.9694	20.0852	19.7285	19.791	19.781	20.1457	19.5864	19.2518	19.3257	18.8128	19.5046	18.7283	19.4616	19.1362	18.9954
Uridine monophosphate	17.144	17.144	18.2997	18.2997	1.1557	2.22793	2.1336e-05	0.000108168	16.5304	17.1447	17.3084	17.3717	16.7944	17.2659	17.0244	17.7117	18.3971	18.7168	18.4047	18.6633	18.2138	18.4676	17.5817	17.9522
Glutathione	25.1496	25.1496	24.8602	24.8602	-0.289387	0.818249	3.19864e-05	0.000158478	25.1078	25.1902	25.2431	24.9404	25.1631	25.0328	25.2302	25.2893	24.6916	24.9093	24.7939	24.9911	24.9277	24.9008	24.8544	24.813
Nicotinamide	25.3189	25.3189	24.5179	24.5179	-0.800958	0.573968	4.0548e-05	0.000192162	24.9307	25.5354	25.2696	25.2449	25.1002	25.4346	25.4349	25.6007	24.442	24.2989	24.6003	24.3522	24.9014	24.5191	24.2484	24.7811
PC (36:5)	25.6467	25.6467	25.4445	25.4445	-0.202196	0.869227	3.99836e-05	0.000192162	25.7109	25.5929	25.7521	25.6638	25.5189	25.7162	25.6211	25.5974	25.4631	25.4457	25.464	25.5151	25.4646	25.3301	25.496	25.3771
Guanosine diphosphate mannose	15.663	15.663	13.7777	13.7777	-1.88534	0.27068	4.54343e-05	0.000210738	14.0938	16.4916	15.7592	13.8433	15.8924	16.0825	16.0023	17.1393	12.8355	12.8355	13.8464	12.8355	15.8082	13.8355	13.9398	14.2854
PC (40:5)	25.928	25.928	25.722	25.722	-0.206011	0.866931	6.4607e-05	0.000293424	26.0586	25.924	26.0088	25.9143	25.8798	26.0053	25.9011	25.7322	25.7318	25.862	25.8015	25.7542	25.7289	25.5393	25.7917	25.5667
PC (40:8)	24.2492	24.2492	23.9207	23.9207	-0.328532	0.796347	6.60448e-05	0.000293832	24.3088	24.1989	24.3153	24.2776	24.0784	24.2372	24.2517	24.3258	23.8607	23.8963	23.9975	24.0444	24.0113	23.6421	23.9014	24.0118
S-Adenosylmethionine	23.6034	23.6034	23.1724	23.1724	-0.430945	0.741776	6.95366e-05	0.000303179	23.6084	23.5332	23.8528	23.364	23.6793	23.5621	23.8134	23.4138	23.0358	23.064	22.9992	23.2191	23.277	23.4126	23.0832	23.2885
CDP-ethanolamine	19.6731	19.6731	19.3073	19.3073	-0.365817	0.77603	7.2865e-05	0.000311462	19.5447	19.7193	19.6322	19.5268	19.5632	19.4823	19.7967	20.1199	18.8412	19.2271	19.1534	19.5095	19.4932	19.4706	19.2356	19.528
Carnitinamide	17.6068	17.6068	16.4357	16.4357	-1.17111	0.44408	7.68528e-05	0.00032219	17.3087	17.7083	18.2093	17.4443	18.3349	17.5812	18.3834	15.8843	15.8843	16.8843	16.9101	17.0331	17.1206	15.8843	15.8843	15.8843
Serine	21.3142	21.3142	20.8582	20.8582	-0.456025	0.728992	8.4908e-05	0.000349244	21.2037	21.3545	21.4607	21.0358	21.3765	21.3926	21.2776	21.4122	20.5638	20.8168	20.8416	20.8721	20.8925	20.9013	21.0704	20.9068
PC (34:2)	27.8439	27.8439	27.6439	27.6439	-0.200068	0.870509	0.000108421	0.000429743	27.979	27.8342	27.9227	27.8206	27.7575	27.9324	27.876	27.629	27.6747	27.7613	27.6877	27.6868	27.6717	27.4854	27.6532	27.5301
SM (d18:1/14:0)	22.7175	22.7175	22.4287	22.4287	-0.288787	0.81859	0.000108012	0.000429743	23.0279	22.6814	22.8298	22.7932	22.7174	22.7028	22.691	22.2966	22.4725	22.576	22.4423	22.578	22.4545	22.1363	22.5068	22.2636
SM (d18:1/18:0)	21.5744	21.5744	21.1905	21.1905	-0.383897	0.766364	0.000158717	0.000617863	21.7977	21.7007	21.7728	21.6211	21.482	21.6316	21.6254	20.9636	21.5886	21.1424	21.4346	21.5135	21.168	20.8979	20.9215	20.8573
Glucose 6-phosphate	16.924	16.924	15.3715	15.3715	-1.55244	0.340932	0.000185291	0.000708656	17.6499	17.2404	16.9227	15.8819	16.9192	15.8967	17.2929	17.5882	15.5256	13.899	15.4367	16.7162	14.899	13.899	16.3925	16.2044
Deoxycarnitine	22.9324	22.9324	22.732	22.732	-0.200367	0.870329	0.000227369	0.000853526	22.9804	23.0581	22.9507	22.788	22.9236	22.9059	22.9067	22.9457	22.6444	22.7101	22.803	22.7282	22.7282	22.8369	22.7854	22.6202
Hydroxy-FA (10:0)	21.2959	21.2959	21.8684	21.8684	0.572526	1.48713	0.000231	0.000853526	21.2412	21.0572	21.4749	21.6573	21.2775	21.3302	21.3567	20.9719	22.2597	21.6016	21.9006	21.5394	21.9198	21.7739	21.803	22.1492
Acetylcholine	22.9318	22.9318	22.732	22.732	-0.199762	0.870694	0.000238509	0.000866582	22.9804	23.0581	22.9507	22.788	22.9236	22.9059	22.9019	22.9457	22.6444	22.7101	22.803	22.7282	22.7282	22.8369	22.7854	22.6202
N-Acetylhexosamine phosphate	18.3863	18.3863	17.6974	17.6974	-0.688855	0.620346	0.000254348	0.000908983	17.9659	18.2584	18.1339	17.7879	18.5445	18.4186	18.8137	19.1675	16.6565	17.886	17.9196	17.0869	18.027	18.3082	17.8877	17.8075
Val-Lys	20.3209	20.3209	19.9453	19.9453	-0.375593	0.770788	0.000259902	0.000913849	20.11	20.3212	20.7383	20.3065	20.4757	19.9445	20.5448	20.1265	19.7779	19.7273	20.0471	19.9911	20.058	20.0472	20.3024	19.6118
Oleamide	17.88	17.88	19.2077	19.2077	1.32776	2.51012	0.000275236	0.000952403	18.5713	18.7293	17.9558	18.0977	18.5538	16.8708	18.3903	15.8708	19.1243	19.4967	19.1425	18.7463	20.0182	19.3547	18.4328	19.3464
PC (36:2)	29.3059	29.3059	29.114	29.114	-0.191883	0.875462	0.000319686	0.00108893	29.4314	29.2986	29.3945	29.3077	29.2369	29.4136	29.306	29.0583	29.218	29.2282	29.1526	29.1736	29.1257	28.9236	29.102	28.9884
Hydroxy-FA (18:1)	23.0649	23.0649	23.5885	23.5885	0.523618	1.43756	0.00032586	0.00109289	23.1168	23.2376	23.2345	22.9704	22.9285	22.8309	23.0438	23.1565	23.9825	23.435	23.4886	23.365	23.4714	23.493	23.7242	23.7483
Acetylaminoadipate	21.2691	21.2691	20.8484	20.8484	-0.420622	0.747103	0.000358631	0.00116798	21.0761	21.3035	21.2595	21.0706	21.2546	21.1569	21.2749	21.7565	20.9196	20.7865	20.8018	20.8852	21.0142	20.8218	20.7037	20.8547
PC (36:1)	27.2871	27.2871	27.0833	27.0833	-0.203832	0.868241	0.000358967	0.00116798	27.4717	27.2947	27.3686	27.3212	27.252	27.4261	27.2522	26.9106	27.2432	27.238	27.1182	27.1038	27.0675	26.8506	27.1163	26.9289
N-Acetylmethionine	17.8732	17.8732	17.1843	17.1843	-0.688931	0.620314	0.000407861	0.00128861	17.2472	17.9843	17.9589	17.9075	17.8504	17.8347	18.1317	18.071	16.1735	16.4851	17.9084	16.8524	17.7003	17.8016	17.0638	17.4891
Taurine	24.9372	24.9372	24.791	24.791	-0.146114	0.903681	0.000404135	0.00128861	24.8992	25.0006	24.9055	24.8756	24.9226	24.8919	24.9688	25.0331	24.6256	24.8611	24.8353	24.9002	24.7926	24.7934	24.7987	24.7214
PC (34:1)	30.2728	30.2728	30.0862	30.0862	-0.186528	0.878718	0.000462293	0.00143971	30.3954	30.3184	30.3467	30.2681	30.1906	30.3729	30.2958	29.9941	30.1998	30.2078	30.1215	30.1376	30.0853	29.9073	30.0919	29.9386
PC (32:2)	24.6255	24.6255	24.4431	24.4431	-0.182449	0.881206	0.000510015	0.00156596	24.7581	24.6384	24.6626	24.5862	24.5434	24.7518	24.6225	24.4411	24.4038	24.581	24.5306	24.5242	24.4489	24.2454	24.4568	24.3538
Glutathione disulfide	22.7115	22.7115	22.3354	22.3354	-0.37606	0.770539	0.000664048	0.00201059	22.4938	22.8465	22.6695	22.3939	22.5786	22.6331	22.7836	23.2927	22.3149	22.2918	22.3799	22.435	22.2461	22.5204	22.1774	22.3178
Acetylcarnitine	21.1826	21.1826	20.8137	20.8137	-0.368974	0.774333	0.00086944	0.00259641	21.4225	21.5725	21.0218	21.0406	20.8761	21.2882	21.0541	21.1852	20.7626	20.9529	20.4562	20.7806	21.018	21.3075	20.3999	20.8315
FA (8:0)	25.6591	25.6591	26.2348	26.2348	0.575732	1.49043	0.00145482	0.00428582	25.6472	25.5037	25.4449	26.1732	25.7902	25.6933	25.6487	25.3716	26.7381	25.9557	26.4006	26.0397	25.8223	26.1602	26.4633	26.299
SM (d18:1/18:1)	20.4286	20.4286	19.7818	19.7818	-0.646769	0.638709	0.00151703	0.0044095	20.624	20.1447	20.8933	20.738	20.3417	20.6656	20.2378	19.7838	20.5253	20.1048	19.8914	19.8849	19.9417	18.5402	19.6229	19.7436
PC (32:1)	27.8041	27.8041	27.6518	27.6518	-0.152318	0.899804	0.00166801	0.00478454	27.9658	27.8225	27.8833	27.7938	27.7199	27.8975	27.806	27.5438	27.7441	27.7735	27.6698	27.7082	27.6799	27.4836	27.6409	27.5141
NADH	15.9533	15.9533	14.9962	14.9962	-0.957075	0.5151	0.00210507	0.0059598	16.4185	15.8287	15.9618	16.4255	16.2655	14.198	15.893	16.6353	15.2014	14.884	14.4603	14.3295	14.7279	15.8903	15.3279	15.1485
Decanoate	24.5448	24.5448	25.1829	25.1829	0.638104	1.55628	0.0022837	0.00630187	24.5347	24.6605	24.0694	24.9803	24.6423	24.4902	24.6125	24.3682	25.9037	25.0144	24.9902	25.4281	24.827	24.8607	25.3858	25.0529
PS (34:2)	19.4026	19.4026	18.8488	18.8488	-0.553756	0.681244	0.00227008	0.00630187	19.8805	19.7529	19.1592	19.6695	19.3981	19.2288	19.1774	18.9541	18.4692	19.2255	19.3737	18.4537	19.4449	18.3262	18.6846	18.8126
Phenylalanine	21.378	21.378	20.9721	20.9721	-0.405933	0.754748	0.0028563	0.00778341	21.2235	21.3228	21.5199	20.9936	21.8531	21.3474	21.2504	21.5134	20.4369	21.2327	20.8	21.013	21.0352	20.9579	20.9732	21.3277
Asparagine	23.2284	23.2284	22.9674	22.9674	-0.260943	0.834542	0.00299063	0.00804885	23.1267	23.2858	23.3188	23.1152	23.1973	23.1982	23.327	23.2581	22.7399	22.8879	23.0582	23.1862	22.9656	23.1775	22.8169	22.9073
Citicoline	20.479	20.479	20.1351	20.1351	-0.343853	0.787934	0.00304103	0.00808469	20.41	20.3446	20.5068	20.3593	20.5146	20.3543	20.6687	20.6734	19.9234	20.3503	19.9458	20.1194	20.2511	20.2018	20.0536	20.2355
PE (38:1)	25.8229	25.8229	25.6708	25.6708	-0.152097	0.899941	0.00323957	0.00850875	25.9601	25.878	25.8679	25.8359	25.7449	25.9505	25.7791	25.5665	25.7609	25.8241	25.7484	25.7419	25.6246	25.4777	25.6934	25.4952
Indole-3-acrylate	14.7786	14.7786	14.0485	14.0485	-0.730039	0.602888	0.00344601	0.00894323	14.0485	15.13	14.0485	15.2308	15.0485	14.0485	16.6251	14.0485	14.0485	14.0485	14.0485	14.0485	14.0485	14.0485	14.0485	14.0485
Pantothenate	17.9165	17.9165	17.3108	17.3108	-0.605772	0.65712	0.00354328	0.00908748	17.8842	18.0049	18.0988	17.8337	17.387	18.2149	17.8378	18.0709	17.0178	16.0178	17.6	17.9435	17.4887	17.413	17.2842	17.7211
Indole	25.0781	25.0781	25.794	25.794	0.715886	1.64249	0.00401806	0.0101853	25.0073	24.9098	25.3317	25.0892	25.1108	25.1018	25.5263	24.5477	26.3889	25.2297	25.0312	26.713	25.8182	26.1451	25.4406	25.585
PC (44:8)	20.4414	20.4414	19.4353	19.4353	-1.00611	0.497888	0.00421761	0.0105683	20.4669	20.411	20.334	20.8626	20.557	20.4809	20.1642	20.2547	18.5613	18.677	20.7423	18.28	20.5144	19.4184	19.6978	19.5912
Mevalolactone	23.793	23.793	24.1283	24.1283	0.335325	1.26166	0.00456381	0.0113058	23.5687	23.404	23.8067	24.2221	23.8339	24.0074	23.7359	23.7656	24.4886	24.0004	24.3444	24.016	24.0747	23.9323	24.0028	24.1675
Hypotaurine	21.9294	21.9294	21.7382	21.7382	-0.191135	0.875916	0.00466567	0.0114283	21.782	21.9371	21.9257	21.8598	21.9349	21.8813	21.9932	22.1211	21.547	21.6862	21.8272	21.8767	21.6652	21.8122	21.7893	21.7021
Cyclic ADP-ribose	20.5815	20.5815	20.3329	20.3329	-0.248618	0.841703	0.00502411	0.011877	20.5782	20.4465	20.6652	20.2549	20.442	20.5206	20.734	21.0105	19.9757	20.4505	20.2206	20.3791	20.398	20.4899	20.3543	20.3949
NAD+	21.7384	21.7384	21.5459	21.5459	-0.192441	0.875124	0.00501648	0.011877	21.642	21.8226	21.7359	21.4858	21.6684	21.6734	21.8296	22.0493	21.4114	21.3565	21.4082	21.6936	21.652	21.6646	21.5383	21.6428
PC (32:0)	27.6791	27.6791	27.5322	27.5322	-0.146941	0.903164	0.00492536	0.011877	27.8045	27.6861	27.7336	27.7039	27.6215	27.8017	27.7092	27.3726	27.665	27.6505	27.5538	27.6188	27.5305	27.3665	27.5262	27.3463
Phosphoenolpyruvate	13.3302	13.3302	12.2432	12.2432	-1.08701	0.470737	0.0050668	0.011877	12.2432	12.2432	13.8196	13.2432	13.2879	13.5694	12.2432	15.9918	12.2432	12.2432	12.2432	12.2432	12.2432	12.2432	12.2432	12.2432
Argininosuccinate	19.4645	19.4645	18.8874	18.8874	-0.577072	0.670323	0.00528395	0.0122543	19.1463	19.6485	19.3101	19.1123	19.6878	19.0755	19.6092	20.1263	18.916	18.4463	18.276	19.383	19.2775	19.2671	18.5761	18.9573
PC (40:4)	24.2087	24.2087	23.9582	23.9582	-0.25046	0.840629	0.00618902	0.0142022	24.3716	24.1196	24.3374	24.2707	24.145	24.1353	24.2082	24.0816	23.8885	24.109	23.939	24.0311	24.1359	23.8028	23.9709	23.7885
Glu-Pro	18.1395	18.1395	17.2322	17.2322	-0.907286	0.533187	0.00799335	0.0181516	18.0156	18.778	18.0375	18.7698	17.5902	17.5822	18.4548	17.888	17.594	17.6727	15.7525	16.9814	18.1493	15.7525	17.9615	17.9939
Phosphoethanolamine	19.4823	19.4823	18.9637	18.9637	-0.518562	0.698067	0.00914618	0.0205553	19.5446	19.5923	19.4526	19.443	18.9954	19.3774	19.3008	20.1522	19.281	18.3028	18.1223	19.2439	19.569	19.1276	19.6052	18.458
Oxohexanoic acid	23.6329	23.6329	24.0305	24.0305	0.397652	1.31736	0.00968354	0.0215409	23.127	23.0735	23.5117	24.1721	23.7788	23.948	23.6943	23.7574	24.4743	23.9858	24.0144	23.8302	24.056	23.7482	23.9805	24.1546
Hydroxy-FA (7:0)	23.0205	23.0205	23.3812	23.3812	0.360682	1.28403	0.010233	0.0223259	23.0027	22.8792	23.0606	23.2028	23.0228	23.2976	23.0442	22.6545	23.2475	23.2797	23.4238	23.1183	23.2063	23.5999	23.4276	23.7468
SM (d18:1/16:0)	26.728	26.728	26.5839	26.5839	-0.144038	0.904983	0.0102413	0.0223259	26.8443	26.8102	26.8245	26.7781	26.6605	26.8007	26.7308	26.3745	26.6637	26.7241	26.6125	26.6501	26.619	26.382	26.5763	26.4435
Carnitine (4:0)	18.9434	18.9434	18.2262	18.2262	-0.717212	0.608272	0.0115239	0.0248733	18.8342	19.425	18.5415	18.199	18.5043	19.6549	19.5336	18.8549	17.9759	18.5896	17.7568	18.0398	19.2329	18.9391	16.9509	18.3246
Ophthalmate	18.7275	18.7275	18.1049	18.1049	-0.622553	0.649521	0.0156825	0.0335174	18.3252	18.5207	18.8088	19.0633	18.6755	18.7136	19.1302	18.5827	17.8745	17.1604	16.1011	18.8975	18.763	18.9276	18.4703	18.6451
FA (16:0)	29.7057	29.7057	30.3028	30.3028	0.597118	1.51269	0.017238	0.0364843	30.1266	29.7829	29.5514	29.6705	30.2113	29.453	29.4958	29.354	30.9804	30.5097	30.1209	30.11	29.6998	29.9614	30.9296	30.1108
beta-Glycerophosphate	20.8359	20.8359	20.2353	20.2353	-0.6006	0.659479	0.0181008	0.0375807	20.6656	20.8872	21.0404	20.6041	20.8413	20.7142	20.845	21.0896	19.8933	20.2629	20.1783	20.3657	20.2283	20.4526	20.1945	20.3069
Glycerol 3-phosphate	20.8359	20.8359	20.2353	20.2353	-0.6006	0.659479	0.0181008	0.0375807	20.6656	20.8872	21.0404	20.6041	20.8413	20.7142	20.845	21.0896	19.8933	20.2629	20.1783	20.3657	20.2283	20.4526	20.1945	20.3069
Glyceraldehyde 3-phosphate	18.0055	18.0055	17.2985	17.2985	-0.707029	0.61258	0.0204761	0.0421113	18.1261	18.3447	18.2833	17.2022	17.7976	17.6718	18.1507	18.4679	14.8673	17.354	17.3514	18.0626	17.9451	17.0685	17.6318	18.1074
FA (18:0)	28.549	28.549	29.1875	29.1875	0.638469	1.55668	0.0223659	0.045568	28.8681	28.6066	28.4338	28.4213	29.3484	28.3364	28.3562	28.021	30.0181	29.3015	29.1999	28.9201	28.6042	28.7571	29.7834	28.9153
PS (40:6)	23.6268	23.6268	23.4918	23.4918	-0.135021	0.910657	0.0240798	0.0486055	23.6296	23.6574	23.7102	23.7042	23.4556	23.7572	23.6905	23.4099	23.4943	23.6428	23.4952	23.6429	23.4852	23.3517	23.4493	23.3732
Lyso-PE (18:1)	18.6679	18.6679	18.1711	18.1711	-0.496803	0.708675	0.0339036	0.0678072	19.0279	19.0105	19.3469	19.3755	18.1948	18.8607	18.5575	16.9695	18.5934	18.7405	18.4088	17.9542	18.6047	17.6713	17.4515	17.9446
Cys-Gly	18.1857	18.1857	17.3897	17.3897	-0.795929	0.575972	0.0345454	0.0684628	18.0787	18.74	18.2469	17.8088	18.7242	17.6545	17.8801	18.352	17.4099	15.4662	17.7833	18.3601	17.838	17.8112	17.2985	17.1506
FA (14:0)	26.1316	26.1316	26.6008	26.6008	0.469162	1.38431	0.0360483	0.0703298	25.8335	25.9422	26.5505	26.0021	26.3112	26.1902	26.4911	25.7321	26.9547	26.4962	26.5798	26.222	27.1382	26.3177	26.3918	26.7057
Glucosamine 6-phosphate	14.0899	14.0899	13.3432	13.3432	-0.746662	0.595981	0.0361327	0.0703298	13.0902	13.0902	13.0902	14.0902	16.2585	14.1606	15.849	13.0902	13.0902	13.0902	13.0902	13.0902	15.1144	13.0902	13.0902	13.0902
Lactate	28.9502	28.9502	29.4533	29.4533	0.503139	1.41729	0.0384088	0.0740984	28.514	27.8734	28.8662	29.4877	29.4517	29.4489	28.751	29.2087	29.7833	29.4992	29.6333	28.6558	29.1346	29.6033	29.3614	29.9558
Creatine	25.2734	25.2734	25.0027	25.0027	-0.270622	0.828962	0.03929	0.0751335	25.0151	25.2613	25.0759	25.1286	25.0545	25.2181	25.0956	26.3378	24.9052	25.1669	25.0176	25.1162	24.968	24.8967	25.0444	24.907
Salicylate	23.0229	23.0229	23.3035	23.3035	0.280649	1.21474	0.0412737	0.0782405	22.7418	22.2888	23.0411	23.1037	23.0516	23.4455	23.4508	23.0595	23.5082	22.7364	23.633	23.1645	23.2881	23.4112	23.1025	23.5843
Cytidine diphosphate	16.9353	16.9353	17.6396	17.6396	0.704302	1.62936	0.0437818	0.0822796	16.5364	16.5442	16.652	17.4875	17.1434	17.2933	16.0252	17.8	17.5276	17.5614	17.1042	17.4026	18.0222	17.7467	17.6804	18.0713
Lumichrome	21.1461	21.1461	22.0415	22.0415	0.895379	1.8601	0.0465708	0.086773	20.745	21.2428	20.5864	20.8121	22.0933	21.6452	20.992	21.0524	22.3228	22.3099	22.2288	21.5661	20.6043	22.1672	23.1124	22.0208
N,N,N-Trimethyllysine	17.7091	17.7091	16.5746	16.5746	-1.13445	0.455507	0.0485284	0.0896541	17.8099	17.157	18.2695	18.2595	18.6354	16.9386	17.7056	16.897	14.7851	16.0318	16.874	16.4294	16.7614	17.2825	16.6025	17.8303
Cytidine monophosphate	13.6873	13.6873	15.2655	15.2655	1.57816	2.98589	0.0497898	0.0912115	14.0271	14.0081	12.2277	14.6735	15.3113	12.2277	14.7957	12.2277	15.997	16.7793	14.3969	12.2277	15.0208	15.1411	16.2367	16.3245
PS (38:5)	20.7664	20.7664	20.5104	20.5104	-0.255996	0.837409	0.0523248	0.0950567	20.9538	20.7474	20.9676	20.7055	20.7103	20.881	20.795	20.3701	20.4545	20.7021	20.7051	20.6851	20.71	20.4499	20.0378	20.3384
Hexitols	17.2685	17.2685	16.4759	16.4759	-0.79261	0.577299	0.0531951	0.0958391	17.2287	18.1185	16.6781	16.6157	17.2466	17.0415	17.6033	17.6154	17.825	16.0366	15.743	16.8052	17.5904	16.0263	14.8867	16.8938
Lysine	18.2349	18.2349	17.4384	17.4384	-0.796551	0.575724	0.0540865	0.0966463	18.2346	19.1805	18.4662	18.8497	18.3806	17.805	18.2266	16.736	16.736	16.736	18.0194	18.1902	16.736	17.736	16.736	18.6171
Trigonelline	20.8509	20.8509	20.4325	20.4325	-0.418381	0.748264	0.0549882	0.0974588	21.0459	20.9958	21.0955	20.5668	20.7729	20.4696	20.5965	21.2642	20.4531	20.5296	20.2966	20.5428	20.2577	20.5631	20.3415	20.4759
N-Undecanoylglycine	22.6793	22.6793	23.9087	23.9087	1.22944	2.34477	0.0581532	0.102237	22.4935	22.9424	23.1744	21.2788	22.9846	22.4467	22.4383	23.6756	27.7487	22.996	22.3883	23.4047	24.0098	22.0469	24.8457	23.8298
Ureidosuccinate	14.5728	14.5728	13.2903	13.2903	-1.28245	0.411096	0.0613186	0.10694	12.5013	16.8629	16.0732	13.7316	15.7014	14.0266	15.1839	12.5013	12.5013	14.7711	14.5503	12.5013	14.4947	12.5013	12.5013	12.5013
3-Hydroxypyruvate	18.4162	18.4162	18.6898	18.6898	0.273511	1.20875	0.0656515	0.112749	18.7386	18.2883	18.8094	18.5056	18.3539	18.2675	18.1988	18.1679	19.8637	18.6061	18.9216	18.7043	18.8487	17.9523	18.5831	18.0383
FA (12:0)	26.0047	26.0047	26.7542	26.7542	0.749443	1.68114	0.0660902	0.112749	25.5734	25.2191	27.1359	26.0283	25.8207	26.1177	25.9198	26.2228	27.9105	26.3788	26.5255	25.5702	28.4988	25.9349	26.0549	27.1598
Leucine	22.2688	22.2688	22.0183	22.0183	-0.250482	0.840615	0.066201	0.112749	22.3539	22.3627	22.3101	22.0376	22.3554	22.3368	22.2802	22.1138	21.8347	22.0059	22.784	21.9005	21.7655	22.0931	21.9087	21.8543
PS (40:5)	23.5941	23.5941	23.485	23.485	-0.109052	0.927197	0.0682855	0.115397	23.6674	23.6529	23.7324	23.6502	23.474	23.6495	23.6313	23.2949	23.4924	23.7092	23.4569	23.6262	23.4833	23.2577	23.4973	23.3572
Myoinositol	24.1156	24.1156	23.9677	23.9677	-0.147838	0.902602	0.0709908	0.119046	24.0989	24.1095	24.0393	24.0564	24.1082	24.0189	23.9687	24.5249	24.0006	24.1518	23.8986	24.2052	23.9881	23.9159	23.79	23.7918
PS (38:6)	17.3655	17.3655	16.215	16.215	-1.15043	0.45049	0.0777113	0.129321	17.755	17.7791	18.3689	18.7182	16.8168	16.3522	17.352	15.7815	14.5779	14.5779	14.5779	18.7646	15.5779	15.8485	18.1956	17.6003
PS (36:1)	26.2518	26.2518	26.3442	26.3442	0.0924127	1.06615	0.0946943	0.156389	26.328	26.288	26.2757	26.3035	26.1518	26.3589	26.2861	26.0221	26.4062	26.4999	26.3125	26.5042	26.3243	26.1699	26.3692	26.1671
Carnitine (3:0)	18.8438	18.8438	18.5168	18.5168	-0.32693	0.797231	0.0994993	0.163089	19.1947	19.7379	18.2855	18.2117	18.6055	19.0512	18.756	18.9077	18.2748	19.1916	18.2071	17.2071	18.9117	18.9973	18.8113	18.5338
Sulfolactate	21.9682	21.9682	22.6939	22.6939	0.725759	1.65377	0.106442	0.173168	20.6033	20.4479	22.7402	22.5437	22.8887	23.5902	21.1875	21.7439	22.8026	22.4283	22.2488	21.7528	22.2938	24.0153	22.3182	23.6917
2',4'-Dihydroxyacetophenone	22.1758	22.1758	22.4354	22.4354	0.259604	1.19715	0.115659	0.185395	22.545	22.6383	22.0315	22.3006	21.7349	22.1217	22.0081	22.0264	22.6872	22.9089	22.2008	22.2424	21.988	22.1517	22.8479	22.4564
Resorcinol monoacetate	22.1758	22.1758	22.4354	22.4354	0.259604	1.19715	0.115659	0.185395	22.545	22.6383	22.0315	22.3006	21.7349	22.1217	22.0081	22.0264	22.6872	22.9089	22.2008	22.2424	21.988	22.1517	22.8479	22.4564
Oxalate	24.447	24.447	24.3301	24.3301	-0.116838	0.922206	0.124513	0.19813	24.2662	24.1989	24.2873	24.3543	24.4305	24.4422	24.6522	24.9442	24.2011	24.2782	24.2281	24.4959	24.3565	24.1659	24.4704	24.4451
Guanosine monophosphate	12.7385	12.7385	13.584	13.584	0.845499	1.79689	0.132418	0.209182	12.4508	14.7524	12.4508	12.4508	12.4508	12.4508	12.4508	12.4508	12.4508	12.4508	12.4508	15.3362	15.8859	15.1959	12.4508	12.4508
Tyrosine	17.6476	17.6476	17.2451	17.2451	-0.402487	0.756553	0.139999	0.219567	17.0054	17.8937	17.2335	17.4521	18.2754	17.9489	18.4658	16.9058	17.2653	16.8823	17.6445	17.5628	16.2048	16.8846	16.9073	18.6092
Lyso-PE (20:4)	16.4286	16.4286	17.0587	17.0587	0.630159	1.54774	0.147615	0.229857	15.5773	16.9016	17.4512	17.8687	16.4107	15.6063	14.5773	17.0355	17.5475	16.9091	15.8565	17.7788	17.7122	16.5253	18.3198	15.8207
alpha-Ketoglutarate	16.9018	16.9018	17.6668	17.6668	0.764943	1.6993	0.155431	0.240312	15.6244	17.6838	17.7281	16.6244	15.6244	18.5411	15.6244	17.764	18.6216	15.6244	15.6244	18.2503	18.4011	18.381	17.3934	19.038
Hydroxy-FA (12:0)	21.5025	21.5025	21.8493	21.8493	0.346866	1.2718	0.166339	0.255365	21.3185	20.9332	22.0565	21.4957	21.5254	21.7841	21.8465	21.06	22.3078	21.5018	21.5847	22.4043	22.2823	21.8359	20.9129	21.9651
Xanthine	14.7823	14.7823	13.6073	13.6073	-1.17506	0.442865	0.169747	0.258775	12.2977	16.1698	12.2977	12.2977	15.9654	16.49	16.452	16.2881	12.2977	12.2977	12.2977	12.2977	14.7224	16.2872	12.2977	16.3596
Carnitine (18:1)	15.1819	15.1819	14.7294	14.7294	-0.452503	0.730774	0.174452	0.261352	16.0311	15.4522	14.4522	14.4522	16.1782	14.4522	15.9849	14.4522	14.4522	14.4522	14.4522	16.6696	14.4522	14.4522	14.4522	14.4522
PE (40:5)	25.5024	25.5024	25.4278	25.4278	-0.0746054	0.949602	0.175034	0.261352	25.5149	25.3667	25.519	25.5051	25.4696	25.6049	25.5539	25.4854	25.4325	25.5738	25.3896	25.5185	25.4595	25.2535	25.4341	25.361
PS (40:7)	19.3428	19.3428	19.0459	19.0459	-0.296896	0.814002	0.173077	0.261352	20.1781	19.2747	19.3845	19.2975	19.4983	19.8446	18.7324	18.5327	19.283	19.1319	19.2075	18.9223	19.5257	19.1677	18.4772	18.6521
Gamma-aminobutyrate	24.3334	24.3334	24.4894	24.4894	0.155988	1.11418	0.177821	0.263707	24.3842	24.5305	24.2435	24.297	24.4089	23.8311	24.572	24.4	24.4674	24.7033	24.0967	24.8379	24.4643	24.4561	24.7294	24.1598
Histidine	23.3811	23.3811	23.3055	23.3055	-0.0756289	0.948928	0.188945	0.278311	23.1537	23.4934	23.2091	23.389	23.319	23.3972	23.4867	23.6008	22.9628	23.2777	23.3722	23.4645	23.2969	23.3222	23.2211	23.5265
FA (18:1)	25.2021	25.2021	25.6192	25.6192	0.417178	1.33531	0.192443	0.281561	24.9622	25.1369	25.099	25.1645	25.7457	25.1566	25.7865	24.565	25.6776	25.5014	25.2627	25.1113	26.2835	25.4509	26.1987	25.4678
Choline	26.153	26.153	26.3998	26.3998	0.246813	1.18658	0.219016	0.318304	26.5822	26.566	26.5318	26.2974	26.1397	25.7877	25.9864	25.3327	26.569	26.6219	26.4425	26.7441	26.0283	25.8058	26.5527	26.4342
FA (20:0)	22.9038	22.9038	23.2004	23.2004	0.296613	1.22826	0.220838	0.318825	22.659	22.8578	22.9962	22.8791	23.4822	22.8404	22.9219	22.5941	23.6327	23.2028	22.9043	23.205	22.9852	22.8741	23.6542	23.1452
Creatinine	23.0773	23.0773	22.9387	22.9387	-0.138648	0.90837	0.249363	0.357638	23.2248	23.3783	22.9653	22.8338	22.8776	23.2761	23.0228	23.0399	22.6802	22.9866	23.1142	22.7783	22.9425	23.3636	22.6857	22.9583
5,6 Dimethylbenzimidazole	20.0863	20.0863	19.6337	19.6337	-0.4526	0.730725	0.25977	0.366451	20.5268	20.366	19.7637	20.3656	19.3905	20.2899	20.0942	19.8937	18.9505	19.6227	21.2148	19.4631	17.7633	20.4291	19.5988	20.0272
Carnitine	20.7625	20.7625	20.6638	20.6638	-0.0986447	0.93391	0.262231	0.366451	21.0586	21.1175	20.3803	20.579	20.6508	20.7071	20.6502	20.9563	20.8814	20.7931	20.3757	20.7085	20.6646	21.0311	20.2919	20.5645
Itaconate	21.4774	21.4774	21.9451	21.9451	0.467628	1.38283	0.257505	0.366451	20.6392	20.5704	21.8294	22.3157	22.4188	22.6992	21.7931	19.5537	21.3986	20.5537	22.5209	21.3292	22.1097	23.3792	21.8398	22.4294
Palatinose	14.2689	14.2689	15.6842	15.6842	1.41533	2.66721	0.26174	0.366451	12.5799	12.5799	12.5799	16.3178	15.9132	12.5799	19.0207	12.5799	17.2336	12.5799	18.3812	15.0029	16.1368	17.8221	12.5799	15.7373
PI (32:0)	19.2803	19.2803	19.4655	19.4655	0.185195	1.13697	0.287041	0.398567	19.2319	19.8252	19.5342	19.2218	19.186	19.3387	19.1691	18.7357	18.7051	19.6969	19.9018	19.5297	19.5568	19.6773	19.36	19.2965
Leu-Leu	21.2767	21.2767	21.6085	21.6085	0.331783	1.25857	0.300143	0.414122	22.1581	22.3649	20.7032	21.7777	21.1676	21.4635	21.5378	19.0413	21.1591	22.333	21.5345	21.7674	21.2794	21.1928	22.0007	21.6012
2-Hydroxybutyrate	19.2278	19.2278	19.6025	19.6025	0.374773	1.29664	0.304502	0.417493	19.0475	17.34	19.8025	19.3392	19.9839	20.0234	18.6381	19.6475	20.0512	20.1065	19.6484	19.1345	18.9204	19.5108	20.1582	19.2903
Pentoses	14.5041	14.5041	15.0379	15.0379	0.533807	1.44774	0.308749	0.420671	15.0511	12.7387	14.8286	12.7387	14.1835	14.3545	15.5073	16.6301	15.6398	14.7247	15.9506	15.1006	14.1054	15.3623	12.7387	16.6808
1-Methylhistidine	17.9587	17.9587	17.659	17.659	-0.299609	0.812472	0.315375	0.425713	18.0855	16.9532	18.4367	18.1204	18.5982	18.2335	18.2886	16.9532	18.2172	16.9532	16.9532	16.9532	18.1739	18.5301	16.9532	18.5383
Proline	25.7481	25.7481	25.6919	25.6919	-0.0561887	0.961802	0.316355	0.425713	25.7233	25.839	25.8906	25.8281	25.802	25.7116	25.7845	25.4058	25.6102	25.5814	25.7691	25.7778	25.7327	25.8362	25.7064	25.5216
Cellobiose	14.4673	14.4673	15.6842	15.6842	1.21688	2.32444	0.329124	0.437495	12.5799	14.1674	12.5799	16.3178	15.9132	12.5799	19.0207	12.5799	17.2336	12.5799	18.3812	15.0029	16.1368	17.8221	12.5799	15.7373
Maltose	14.4673	14.4673	15.6842	15.6842	1.21688	2.32444	0.329124	0.437495	12.5799	14.1674	12.5799	16.3178	15.9132	12.5799	19.0207	12.5799	17.2336	12.5799	18.3812	15.0029	16.1368	17.8221	12.5799	15.7373
Carnitine (14:0)	14.6455	14.6455	14.9365	14.9365	0.291009	1.2235	0.350547	0.460357	14.2402	15.4192	15.3036	14.2402	15.2402	14.2402	14.2402	14.2402	14.2402	14.2402	14.2402	14.2402	16.2169	16.6249	14.2402	15.4493
FA (16:1)	25.3514	25.3514	25.7419	25.7419	0.390522	1.31087	0.349279	0.460357	24.7907	24.7318	26.076	25.0201	25.7702	25.2029	26.5201	24.6995	25.4966	25.7372	25.9594	25.2099	27.0356	25.3331	25.4044	25.7592
Deoxyribose	15.6229	15.6229	16.4698	16.4698	0.846916	1.79865	0.358394	0.465058	13.7475	13.7475	16.9106	17.3557	16.6232	16.6643	16.1868	13.7475	17.3972	15.9997	17.5439	13.7475	13.7475	17.2839	17.6138	18.4249
PE (38:5)	25.9016	25.9016	25.8596	25.8596	-0.0420281	0.971289	0.357953	0.465058	25.92	25.8495	25.9057	25.8648	25.885	25.9028	25.932	25.9529	25.7929	25.9494	25.8608	25.9604	25.8942	25.7656	25.9025	25.7508
Quinolinate	15.7063	15.7063	16.0971	16.0971	0.390781	1.3111	0.461171	0.594883	16.182	15.9385	15.8728	16.4293	15.8001	13.8344	13.8344	17.7589	13.8344	16.4197	16.2151	16.7236	16.7578	15.6904	16.8475	16.2881
Glycerol cyclic phosphate	16.7698	16.7698	16.5297	16.5297	-0.240046	0.846718	0.475149	0.608727	16.9913	16.7952	16.5862	16.6498	16.4826	16.665	16.6216	17.3667	16.5245	17.4615	16.8753	17.3166	17.2764	16.2012	15.3826	15.1997
PS (36:4)	19.3801	19.3801	19.2161	19.2161	-0.164031	0.892528	0.477488	0.608727	19.529	19.5964	19.3352	19.1833	18.7479	19.6711	19.496	19.4822	19.0757	19.7996	19.0754	19.2459	19.3959	19.2766	18.1832	19.6765
Alanine	22.5982	22.5982	22.6831	22.6831	0.0848979	1.06061	0.491516	0.619367	22.5222	22.4674	22.9432	22.8241	22.3299	22.3686	22.5934	22.7372	22.559	22.6753	22.4655	23.0973	22.8983	22.8729	22.7559	22.1409
PS (38:3)	22.6733	22.6733	22.6265	22.6265	-0.0468738	0.968032	0.490456	0.619367	22.8184	22.6694	22.7219	22.7977	22.62	22.8297	22.6435	22.2862	22.6121	22.7862	22.5816	22.7742	22.5883	22.4265	22.6875	22.5554
N-Formylmethionine	13.4497	13.4497	13.0913	13.0913	-0.358407	0.780025	0.50007	0.622945	13.5412	14.032	13.8457	11.4891	14.6284	11.4891	13.7617	14.8103	14.2167	11.4891	11.4891	13.8052	14.3563	11.4891	13.6046	14.2801
SM (d18:1/22:0)	15.993	15.993	16.3276	16.3276	0.334619	1.26104	0.498695	0.622945	18.1843	16.657	14.3739	14.3739	16.6115	17.4209	15.9487	14.3739	15.3739	16.2053	16.5605	18.0414	17.6099	15.9631	16.4929	14.3739
Suberate	20.1576	20.1576	19.785	19.785	-0.372624	0.772376	0.504335	0.624688	19.9106	18.4019	19.8171	20.4168	19.9585	20.7883	20.6264	21.341	18.4019	18.4019	20.9487	18.4019	20.3325	20.4636	20.8299	20.4991
trans-4-Hydroxyproline	24.5891	24.5891	24.4724	24.4724	-0.116714	0.922286	0.523405	0.644646	24.1099	24.5591	24.2027	24.4576	24.2767	24.5024	24.392	26.2126	24.4227	24.5851	24.4836	24.6332	24.5122	24.1695	24.5285	24.4447
3-Hydroxymethylglutarate	22.3253	22.3253	22.2844	22.2844	-0.0408829	0.97206	0.529894	0.648971	22.1989	22.3297	22.3171	22.2977	22.2075	22.1706	22.3096	22.7713	22.3611	22.2525	22.3099	22.4176	22.2804	22.2146	22.1853	22.2541
5-Aminolevulinate	24.4992	24.4992	24.3813	24.3813	-0.117912	0.92152	0.536854	0.65019	24.0282	24.4323	24.0521	24.3625	24.1368	24.4805	24.3071	26.1947	24.4227	24.4888	24.3639	24.5348	24.3411	24.0993	24.4522	24.3479
cis-4-Hydroxyproline	24.4992	24.4992	24.3813	24.3813	-0.117912	0.92152	0.536854	0.65019	24.0282	24.4323	24.0521	24.3625	24.1368	24.4805	24.3071	26.1947	24.4227	24.4888	24.3639	24.5348	24.3411	24.0993	24.4522	24.3479
FA (20:2)	16.082	16.082	15.5129	15.5129	-0.569063	0.674054	0.544345	0.652017	17.1608	16.6455	18.633	14.6564	14.6564	14.6564	17.5908	14.6564	14.6564	14.6564	16.9214	14.6564	19.2435	14.6564	14.6564	14.6564
PE (38:6)	24.1749	24.1749	24.121	24.121	-0.0538905	0.963335	0.54322	0.652017	24.1895	24.1454	24.2114	24.1122	24.1471	24.1786	24.22	24.1953	24.0774	24.2139	24.0968	24.2424	24.1128	23.9519	24.2636	24.0095
4-Guanidinobutanoate	21.0845	21.0845	21.1683	21.1683	0.0838458	1.05984	0.599911	0.706922	20.6681	21.2399	20.8646	21.2468	21.1767	20.8421	21.3296	21.3079	21.2695	21.2899	21.1169	21.24	21.0633	21.1236	21.1017	21.1415
Citramalate	21.6509	21.6509	21.7648	21.7648	0.113906	1.08215	0.598144	0.706922	20.8243	21.8962	21.6959	21.6881	21.6993	21.6575	21.4402	22.3053	22.5259	20.976	21.7664	21.8683	21.746	21.4952	21.9901	21.7503
Leu-Pro	17.699	17.699	17.5774	17.5774	-0.121554	0.919197	0.598213	0.706922	18.7821	18.0239	17.8194	17.1566	17.8742	17.8489	18.1922	15.8947	17.6423	17.7706	17.3776	18.161	18.1299	17.253	17.3646	16.9204
CMP-2-aminoethylphosphonate	14.7551	14.7551	14.4885	14.4885	-0.266621	0.831264	0.624442	0.731873	12.8044	16.256	16.1334	15.1804	13.9262	15.2891	12.8044	15.6472	15.4243	14.4735	14.0988	12.8044	14.1628	13.8308	15.0663	16.047
4-Pyridoxate	16.6019	16.6019	16.9172	16.9172	0.315335	1.2443	0.630059	0.732549	17.112	16.628	17.5741	17.4197	16.0594	14.8993	17.0624	16.0599	14.8993	14.8993	16.7566	14.8993	17.5987	18.8562	18.4692	18.959
Urocanate	19.9284	19.9284	20.3497	20.3497	0.421275	1.33911	0.631739	0.732549	18.5785	19.5452	18.8758	20.9796	20.5832	19.8186	19.8415	21.2051	18.2521	19.5679	20.538	19.8208	20.8705	21.755	20.0191	21.9744
PE (38:4)	27.3239	27.3239	27.343	27.343	0.0190735	1.01331	0.642735	0.741356	27.2842	27.2472	27.3471	27.3148	27.2842	27.4071	27.3479	27.3591	27.3436	27.4143	27.3437	27.4404	27.3419	27.2065	27.4108	27.2429
PE (36:1)	27.1655	27.1655	27.1847	27.1847	0.0192225	1.01341	0.646564	0.741847	27.2237	27.1381	27.2333	27.1625	27.1298	27.2485	27.1773	27.0109	27.3221	27.2847	27.185	27.2798	27.1719	26.9982	27.2058	27.0305
2-/3-Phosphoglycerate	13.6126	13.6126	13.4085	13.4085	-0.204064	0.868101	0.684286	0.781018	12.7992	15.0036	14.9683	12.7992	12.7992	13.9332	13.7992	12.7992	12.7992	12.7992	15.4125	12.7992	12.7992	12.7992	12.7992	15.061
PE (40:7)	24.7455	24.7455	24.7781	24.7781	0.0326543	1.02289	0.700687	0.795572	24.7638	24.7104	24.7666	24.7967	24.7064	24.8974	24.3245	24.998	24.6618	24.8188	24.8148	24.9002	24.8094	24.6206	24.8913	24.7081
Ornithine	18.1979	18.1979	18.3991	18.3991	0.201209	1.14966	0.711435	0.80359	16.511	17.6473	18.1926	19.1482	18.7652	18.6863	18.9577	17.6746	18.3596	16.9547	17.4632	18.5288	17.8595	19.3323	18.7005	19.994
Azelate	20.5921	20.5921	20.7089	20.7089	0.116754	1.08429	0.723315	0.812797	20.3801	20.427	19.9836	19.8809	20.0478	21.1486	20.8497	22.0195	20.5784	20.7146	20.725	20.7866	20.6001	20.8613	20.6299	20.7753
PE (36:2)	26.1493	26.1493	26.1644	26.1644	0.0150989	1.01052	0.730963	0.816715	26.1683	26.101	26.1909	26.1208	26.0514	26.2306	26.1812	26.1505	26.1809	26.3123	26.1706	26.2378	26.2044	26.003	26.154	26.0525
Succinate	21.9276	21.9276	21.997	21.997	0.0694282	1.0493	0.734295	0.816715	21.2584	22.6533	21.9428	21.7179	22.5057	21.7813	21.602	21.9594	22.2617	22.9497	22.3225	21.2843	21.8293	21.8392	21.4646	22.0252
Ribulose/Ribose/Xylulose 5-phosphate	13.0681	13.0681	13.3207	13.3207	0.252574	1.19133	0.743752	0.823035	15.7447	12.1978	15.6131	12.1978	12.1978	12.1978	12.1978	12.1978	12.1978	12.1978	12.1978	12.1978	12.1978	15.4457	14.9348	15.1957
Adenosine	19.0952	19.0952	18.8594	18.8594	-0.235783	0.849224	0.749507	0.825215	18.2697	19.8932	16.2232	17.1621	18.9069	20.7793	20.3975	21.1293	17.5686	17.9555	17.2233	17.4622	20.5122	20.5199	18.7675	20.8658
PE (36:3)	23.4918	23.4918	23.4662	23.4662	-0.0256354	0.982388	0.756506	0.828735	23.5226	23.3401	23.6163	23.4668	23.5534	23.703	23.3768	23.3555	23.4298	23.5807	23.3275	23.5883	23.4144	23.2637	23.6182	23.5067
Fumarate	21.6105	21.6105	21.5213	21.5213	-0.0891947	0.940047	0.767177	0.836222	21.2607	21.7385	20.8132	22.1904	21.9317	21.0578	21.2319	22.6594	21.735	21.2843	20.7684	22.0519	21.8233	21.7922	21.9513	20.7638
2-Hydroxyglutarate	21.6509	21.6509	21.693	21.693	0.0421376	1.02964	0.810978	0.870903	20.8243	21.8962	21.6959	21.6881	21.6993	21.6575	21.4402	22.3053	22.1959	20.976	21.7664	21.8683	21.746	21.4952	21.746	21.7503
Lyso-PE (16:0)	16.4888	16.4888	16.3311	16.3311	-0.157671	0.896471	0.806505	0.870903	18.2124	16.9606	17.2844	16.5339	17.4313	14.3746	14.3746	16.7386	15.3746	17.4436	16.112	17.4143	16.9966	17.1935	14.3746	15.7398
NADP+	17.6497	17.6497	17.5329	17.5329	-0.11678	0.922244	0.810446	0.870903	17.2226	17.0679	18.2562	17.1451	18.4745	17.5467	18.0992	17.3856	17.5808	18.3686	14.168	16.8589	18.5578	18.3918	18.1647	18.1729
PE (38:3)	24.4282	24.4282	24.4161	24.4161	-0.0120687	0.991669	0.824728	0.881327	24.3941	24.3909	24.3595	24.4492	24.3181	24.5702	24.5521	24.3911	24.3395	24.6274	24.2569	24.533	24.4201	24.2835	24.497	24.3715
Carnitine (16:1)	14.9951	14.9951	14.922	14.922	-0.0730972	0.950595	0.845724	0.890666	14.5702	14.5702	14.5702	14.5702	14.5702	15.5702	15.9561	15.5832	14.5702	14.5702	16.1104	15.8441	14.5702	14.5702	14.5702	14.5702
PE (32:0)	20.1195	20.1195	20.0842	20.0842	-0.0352995	0.975829	0.843762	0.890666	20.2996	20.013	20.7558	20.5597	19.7855	20.5324	19.4632	19.5467	19.9685	19.8758	20.7087	20.5674	18.9595	19.8794	20.0097	20.7046
Uridine	14.0525	14.0525	14.18	14.18	0.127562	1.09245	0.841001	0.890666	13.4404	15.6245	13.4404	13.4404	13.4404	16.1528	13.4404	13.4404	15.3259	13.4404	13.4404	13.4404	13.4404	15.6181	13.4404	15.2942
Malonate	21.4859	21.4859	21.4575	21.4575	-0.0284314	0.980486	0.863356	0.904864	21.5311	21.4652	20.9186	21.4622	21.5237	21.4793	21.5738	21.9336	22.2873	21.1456	21.0351	21.108	21.3876	21.474	21.6136	21.6087
Citrulline	17.9297	17.9297	17.9772	17.9772	0.047411	1.03341	0.88714	0.925342	18.2907	18.273	18.2185	18.0433	17.4872	18.5345	17.9619	16.6289	17.2477	17.2504	16.6946	18.0789	18.6572	18.696	18.1718	19.0207
Cortisol 21-acetate	17.0245	17.0245	16.9447	16.9447	-0.0797442	0.946225	0.895644	0.928772	17.9205	17.2572	15.4047	15.4047	18.6532	17.4405	18.7104	15.4047	15.4047	18.8084	17.3756	17.0752	15.4047	17.7197	15.4047	18.3648
PE (34:2)	22.7358	22.7358	22.7417	22.7417	0.00589357	1.00409	0.898949	0.928772	22.8111	22.5999	22.8444	22.6959	22.6479	22.7956	22.8469	22.645	22.7619	22.7222	22.8368	22.7994	22.7203	22.6844	22.8068	22.602
N-Acetylaspartate	21.3617	21.3617	21.3518	21.3518	-0.00988846	0.993169	0.906573	0.93223	21.1574	21.4568	21.6838	21.3191	21.0993	21.1069	21.3361	21.734	21.379	21.4696	21.4802	21.4913	21.1536	21.1759	21.3577	21.3071
Hexosamines	16.7234	16.7234	16.7823	16.7823	0.0588776	1.04166	0.915562	0.937054	16.9896	16.4932	17.1446	16.5545	16.0205	17.4127	15.3995	17.7723	16.5897	16.6563	17.3561	15.2118	17.399	17.4525	17.4315	16.1612
Sedoheptulose 7-phosphate	14.8855	14.8855	14.844	14.844	-0.0414823	0.971656	0.921628	0.938855	14.2539	14.2539	16.4627	15.5146	14.2539	14.2539	14.2539	15.8376	14.2539	14.2539	16.6436	14.2539	14.2539	14.2539	16.5857	14.2539
Dethiobiotin	19.2246	19.2246	19.2526	19.2526	0.0280211	1.01961	0.939368	0.948066	20.0752	20.3472	18.1166	18.3229	19.3671	19.2139	19.7346	18.619	18.1916	20.2375	19.4394	19.9703	19.123	18.157	20.1373	18.7645
S-Methylthioadenosine	17.9623	17.9623	17.9895	17.9895	0.027143	1.01899	0.938305	0.948066	18.2494	16.6624	18.373	17.475	18.3261	19.3088	18.6571	16.6468	17.0346	17.6519	18.4058	17.5144	18.2104	18.6637	17.9821	18.4529
Methyl vanillate	19.0842	19.0842	19.0489	19.0489	-0.0353061	0.975825	0.943842	0.948192	20.3418	20.6894	18.1408	18.8429	18.3188	19.4657	17.9039	18.9705	19.5327	20.404	19.8333	16.2323	18.3178	18.5718	20.5521	18.9473
PE (34:1)	25.6546	25.6546	25.656	25.656	0.00139495	1.00097	0.971032	0.971032	25.673	25.5898	25.6887	25.6436	25.6114	25.7272	25.6847	25.6188	25.7065	25.7618	25.6977	25.7124	25.6897	25.4824	25.6292	25.5685
1-Aminocyclopropanecarboxylate	11.4891	11.4891	11.4891	11.4891	0	1			11.4891	11.4891	11.4891	11.4891	11.4891	11.4891	11.4891	11.4891	11.4891	11.4891	11.4891	11.4891	11.4891	11.4891	11.4891	11.4891
1-Hydroxy-2-naphthoate	11.4891	11.4891	11.4891	11.4891	0	1			11.4891	11.4891	11.4891	11.4891	11.4891	11.4891	11.4891	11.4891	11.4891	11.4891	11.4891	11.4891	11.4891	11.4891	11.4891	11.4891
1-Methyladenosine	11.4891	11.4891	11.4891	11.4891	0	1			11.4891	11.4891	11.4891	11.4891	11.4891	11.4891	11.4891	11.4891	11.4891	11.4891	11.4891	11.4891	11.4891	11.4891	11.4891	11.4891
1-Methylnicotinamide	11.4891	11.4891	11.4891	11.4891	0	1			11.4891	11.4891	11.4891	11.4891	11.4891	11.4891	11.4891	11.4891	11.4891	11.4891	11.4891	11.4891	11.4891	11.4891	11.4891	11.4891
1,3/ 2,3-Bisphosphoglycerate	11.4891	11.4891	11.4891	11.4891	0	1			11.4891	11.4891	11.4891	11.4891	11.4891	11.4891	11.4891	11.4891	11.4891	11.4891	11.4891	11.4891	11.4891	11.4891	11.4891	11.4891
2-(3-Carboxy-3-aminopropyl)-histidine	11.4891	11.4891	11.4891	11.4891	0	1			11.4891	11.4891	11.4891	11.4891	11.4891	11.4891	11.4891	11.4891	11.4891	11.4891	11.4891	11.4891	11.4891	11.4891	11.4891	11.4891
2-Aminophenol	11.4891	11.4891	11.4891	11.4891	0	1			11.4891	11.4891	11.4891	11.4891	11.4891	11.4891	11.4891	11.4891	11.4891	11.4891	11.4891	11.4891	11.4891	11.4891	11.4891	11.4891
2-Deoxyglucose	11.4891	11.4891	11.4891	11.4891	0	1			11.4891	11.4891	11.4891	11.4891	11.4891	11.4891	11.4891	11.4891	11.4891	11.4891	11.4891	11.4891	11.4891	11.4891	11.4891	11.4891
2-Hydroxy-4-(methylthio)butanoate	11.4891	11.4891	11.4891	11.4891	0	1			11.4891	11.4891	11.4891	11.4891	11.4891	11.4891	11.4891	11.4891	11.4891	11.4891	11.4891	11.4891	11.4891	11.4891	11.4891	11.4891
2-Hydroxyphenylacetate	11.4891	11.4891	11.4891	11.4891	0	1			11.4891	11.4891	11.4891	11.4891	11.4891	11.4891	11.4891	11.4891	11.4891	11.4891	11.4891	11.4891	11.4891	11.4891	11.4891	11.4891
2-Mannosyl-3-phosphoglycerate	11.4891	11.4891	11.4891	11.4891	0	1			11.4891	11.4891	11.4891	11.4891	11.4891	11.4891	11.4891	11.4891	11.4891	11.4891	11.4891	11.4891	11.4891	11.4891	11.4891	11.4891
2-Methylmaleate	11.4891	11.4891	11.4891	11.4891	0	1			11.4891	11.4891	11.4891	11.4891	11.4891	11.4891	11.4891	11.4891	11.4891	11.4891	11.4891	11.4891	11.4891	11.4891	11.4891	11.4891
2-Quinolinecarboxylate	14.0456	14.0456	13.9199	13.9199	-0.125703	0.916557			14.7945	13.7945	14.8029	13.7945	13.7945	13.7945	13.7945	13.7945	13.7945	13.7945	13.7945	13.7945	13.7945	13.7945	14.7973	13.7945
2,3-Diaminopropionate	11.4891	11.4891	11.4891	11.4891	0	1			11.4891	11.4891	11.4891	11.4891	11.4891	11.4891	11.4891	11.4891	11.4891	11.4891	11.4891	11.4891	11.4891	11.4891	11.4891	11.4891
2,3-Dihydroxybenzoate	11.4891	11.4891	11.4891	11.4891	0	1			11.4891	11.4891	11.4891	11.4891	11.4891	11.4891	11.4891	11.4891	11.4891	11.4891	11.4891	11.4891	11.4891	11.4891	11.4891	11.4891
2,4-Dihydroxypteridine	11.4891	11.4891	11.4891	11.4891	0	1			11.4891	11.4891	11.4891	11.4891	11.4891	11.4891	11.4891	11.4891	11.4891	11.4891	11.4891	11.4891	11.4891	11.4891	11.4891	11.4891
2,5-Dihydroxybenzoate	11.4891	11.4891	11.4891	11.4891	0	1			11.4891	11.4891	11.4891	11.4891	11.4891	11.4891	11.4891	11.4891	11.4891	11.4891	11.4891	11.4891	11.4891	11.4891	11.4891	11.4891
2,5-Dimethylpyrazine	11.4891	11.4891	11.4891	11.4891	0	1			11.4891	11.4891	11.4891	11.4891	11.4891	11.4891	11.4891	11.4891	11.4891	11.4891	11.4891	11.4891	11.4891	11.4891	11.4891	11.4891
2,6-Dihydroxypyridine	11.4891	11.4891	11.4891	11.4891	0	1			11.4891	11.4891	11.4891	11.4891	11.4891	11.4891	11.4891	11.4891	11.4891	11.4891	11.4891	11.4891	11.4891	11.4891	11.4891	11.4891
3-(2-Hydroxyphenyl)propanoate	11.4891	11.4891	11.4891	11.4891	0	1			11.4891	11.4891	11.4891	11.4891	11.4891	11.4891	11.4891	11.4891	11.4891	11.4891	11.4891	11.4891	11.4891	11.4891	11.4891	11.4891
3-(4-Hydroxyphenyl)pyruvate	11.4891	11.4891	11.4891	11.4891	0	1			11.4891	11.4891	11.4891	11.4891	11.4891	11.4891	11.4891	11.4891	11.4891	11.4891	11.4891	11.4891	11.4891	11.4891	11.4891	11.4891
3-Amino-4-hydroxybenzoate	11.4891	11.4891	11.4891	11.4891	0	1			11.4891	11.4891	11.4891	11.4891	11.4891	11.4891	11.4891	11.4891	11.4891	11.4891	11.4891	11.4891	11.4891	11.4891	11.4891	11.4891
3-Amino-5-hydroxybenzoate	11.4891	11.4891	11.4891	11.4891	0	1			11.4891	11.4891	11.4891	11.4891	11.4891	11.4891	11.4891	11.4891	11.4891	11.4891	11.4891	11.4891	11.4891	11.4891	11.4891	11.4891
3-Dehydroshikimate	11.4891	11.4891	11.4891	11.4891	0	1			11.4891	11.4891	11.4891	11.4891	11.4891	11.4891	11.4891	11.4891	11.4891	11.4891	11.4891	11.4891	11.4891	11.4891	11.4891	11.4891
3-Hydroxy-3-methylglutaryl-CoA	11.4891	11.4891	11.4891	11.4891	0	1			11.4891	11.4891	11.4891	11.4891	11.4891	11.4891	11.4891	11.4891	11.4891	11.4891	11.4891	11.4891	11.4891	11.4891	11.4891	11.4891
3-Hydroxyanthranilate	11.4891	11.4891	11.4891	11.4891	0	1			11.4891	11.4891	11.4891	11.4891	11.4891	11.4891	11.4891	11.4891	11.4891	11.4891	11.4891	11.4891	11.4891	11.4891	11.4891	11.4891
3-Hydroxybenzoate	11.4891	11.4891	11.4891	11.4891	0	1			11.4891	11.4891	11.4891	11.4891	11.4891	11.4891	11.4891	11.4891	11.4891	11.4891	11.4891	11.4891	11.4891	11.4891	11.4891	11.4891
3-Hydroxybutyrate	11.4891	11.4891	11.4891	11.4891	0	1			11.4891	11.4891	11.4891	11.4891	11.4891	11.4891	11.4891	11.4891	11.4891	11.4891	11.4891	11.4891	11.4891	11.4891	11.4891	11.4891
3-Hydroxycarnitine (14:0)	13.8494	13.8494	14.0764	14.0764	0.226996	1.1704			13.8494	13.8494	13.8494	13.8494	13.8494	13.8494	13.8494	13.8494	15.6654	13.8494	13.8494	13.8494	13.8494	13.8494	13.8494	13.8494
3-Hydroxycarnitine (16:0)	14.599	14.599	14.7836	14.7836	0.184572	1.13648			14.599	14.599	14.599	14.599	14.599	14.599	14.599	14.599	14.599	14.599	14.599	14.599	16.0756	14.599	14.599	14.599
3-Hydroxycarnitine (18:1)	13.3836	13.3836	13.4924	13.4924	0.108854	1.07837			13.1841	13.1841	13.1841	13.1841	13.1841	13.1841	14.7798	13.1841	15.6506	13.1841	13.1841	13.1841	13.1841	13.1841	13.1841	13.1841
3-Hydroxycarnitine (4:0)	16.0373	16.0373	16.0373	16.0373	0	1			16.0373	16.0373	16.0373	16.0373	16.0373	16.0373	16.0373	16.0373	16.0373	16.0373	16.0373	16.0373	16.0373	16.0373	16.0373	16.0373
3-Hydroxycarnitine (5:0)	14.9108	14.9108	14.9108	14.9108	0	1			14.9108	14.9108	14.9108	14.9108	14.9108	14.9108	14.9108	14.9108	14.9108	14.9108	14.9108	14.9108	14.9108	14.9108	14.9108	14.9108
3-Hydroxycarnitine (6:0)	13.7734	13.7734	13.6484	13.6484	-0.125	0.917004			13.6484	13.6484	14.6484	13.6484	13.6484	13.6484	13.6484	13.6484	13.6484	13.6484	13.6484	13.6484	13.6484	13.6484	13.6484	13.6484
3-Hydroxycarnitine (8:0)	11.4891	11.4891	11.4891	11.4891	0	1			11.4891	11.4891	11.4891	11.4891	11.4891	11.4891	11.4891	11.4891	11.4891	11.4891	11.4891	11.4891	11.4891	11.4891	11.4891	11.4891
3-Hydroxyphenylacetate	11.4891	11.4891	11.4891	11.4891	0	1			11.4891	11.4891	11.4891	11.4891	11.4891	11.4891	11.4891	11.4891	11.4891	11.4891	11.4891	11.4891	11.4891	11.4891	11.4891	11.4891
3-Methoxy-4-hydroxymandelate	11.4891	11.4891	11.4891	11.4891	0	1			11.4891	11.4891	11.4891	11.4891	11.4891	11.4891	11.4891	11.4891	11.4891	11.4891	11.4891	11.4891	11.4891	11.4891	11.4891	11.4891
3-Methoxytyramine	11.4891	11.4891	11.4891	11.4891	0	1			11.4891	11.4891	11.4891	11.4891	11.4891	11.4891	11.4891	11.4891	11.4891	11.4891	11.4891	11.4891	11.4891	11.4891	11.4891	11.4891
3-Methoxytyrosine	11.4891	11.4891	11.4891	11.4891	0	1			11.4891	11.4891	11.4891	11.4891	11.4891	11.4891	11.4891	11.4891	11.4891	11.4891	11.4891	11.4891	11.4891	11.4891	11.4891	11.4891
3-Methyl-2-oxindole	11.4891	11.4891	11.4891	11.4891	0	1			11.4891	11.4891	11.4891	11.4891	11.4891	11.4891	11.4891	11.4891	11.4891	11.4891	11.4891	11.4891	11.4891	11.4891	11.4891	11.4891
3-Methyl-2-oxovalerate	11.4891	11.4891	11.4891	11.4891	0	1			11.4891	11.4891	11.4891	11.4891	11.4891	11.4891	11.4891	11.4891	11.4891	11.4891	11.4891	11.4891	11.4891	11.4891	11.4891	11.4891
3-Methyladenine	11.4891	11.4891	11.4891	11.4891	0	1			11.4891	11.4891	11.4891	11.4891	11.4891	11.4891	11.4891	11.4891	11.4891	11.4891	11.4891	11.4891	11.4891	11.4891	11.4891	11.4891
3-Methylcrotonyl-CoA	11.4891	11.4891	11.4891	11.4891	0	1			11.4891	11.4891	11.4891	11.4891	11.4891	11.4891	11.4891	11.4891	11.4891	11.4891	11.4891	11.4891	11.4891	11.4891	11.4891	11.4891
3-Methylhistamine	11.4891	11.4891	11.4891	11.4891	0	1			11.4891	11.4891	11.4891	11.4891	11.4891	11.4891	11.4891	11.4891	11.4891	11.4891	11.4891	11.4891	11.4891	11.4891	11.4891	11.4891
3-Nitrotyrosine	11.4891	11.4891	11.4891	11.4891	0	1			11.4891	11.4891	11.4891	11.4891	11.4891	11.4891	11.4891	11.4891	11.4891	11.4891	11.4891	11.4891	11.4891	11.4891	11.4891	11.4891
3-Sulfinoalanine	11.4891	11.4891	11.4891	11.4891	0	1			11.4891	11.4891	11.4891	11.4891	11.4891	11.4891	11.4891	11.4891	11.4891	11.4891	11.4891	11.4891	11.4891	11.4891	11.4891	11.4891
3,4 Dihydroxymandelate	11.4891	11.4891	11.4891	11.4891	0	1			11.4891	11.4891	11.4891	11.4891	11.4891	11.4891	11.4891	11.4891	11.4891	11.4891	11.4891	11.4891	11.4891	11.4891	11.4891	11.4891
3,4-Dihydroxybenzoate	11.4891	11.4891	11.4891	11.4891	0	1			11.4891	11.4891	11.4891	11.4891	11.4891	11.4891	11.4891	11.4891	11.4891	11.4891	11.4891	11.4891	11.4891	11.4891	11.4891	11.4891
3,4-Dihydroxyphenylacetate	11.4891	11.4891	11.4891	11.4891	0	1			11.4891	11.4891	11.4891	11.4891	11.4891	11.4891	11.4891	11.4891	11.4891	11.4891	11.4891	11.4891	11.4891	11.4891	11.4891	11.4891
3,4-Dihydroxyphenylglycol	11.4891	11.4891	11.4891	11.4891	0	1			11.4891	11.4891	11.4891	11.4891	11.4891	11.4891	11.4891	11.4891	11.4891	11.4891	11.4891	11.4891	11.4891	11.4891	11.4891	11.4891
3,5-Diiodothyronine	11.4891	11.4891	11.4891	11.4891	0	1			11.4891	11.4891	11.4891	11.4891	11.4891	11.4891	11.4891	11.4891	11.4891	11.4891	11.4891	11.4891	11.4891	11.4891	11.4891	11.4891
3,5-Diiodotyrosine	11.4891	11.4891	11.4891	11.4891	0	1			11.4891	11.4891	11.4891	11.4891	11.4891	11.4891	11.4891	11.4891	11.4891	11.4891	11.4891	11.4891	11.4891	11.4891	11.4891	11.4891
4-Acetamidobutanoate	11.4891	11.4891	11.4891	11.4891	0	1			11.4891	11.4891	11.4891	11.4891	11.4891	11.4891	11.4891	11.4891	11.4891	11.4891	11.4891	11.4891	11.4891	11.4891	11.4891	11.4891
4-Aminobenzoate	11.4891	11.4891	11.4891	11.4891	0	1			11.4891	11.4891	11.4891	11.4891	11.4891	11.4891	11.4891	11.4891	11.4891	11.4891	11.4891	11.4891	11.4891	11.4891	11.4891	11.4891
4-Coumarate	11.4891	11.4891	11.4891	11.4891	0	1			11.4891	11.4891	11.4891	11.4891	11.4891	11.4891	11.4891	11.4891	11.4891	11.4891	11.4891	11.4891	11.4891	11.4891	11.4891	11.4891
4-Hydroxybenzoate	11.4891	11.4891	11.4891	11.4891	0	1			11.4891	11.4891	11.4891	11.4891	11.4891	11.4891	11.4891	11.4891	11.4891	11.4891	11.4891	11.4891	11.4891	11.4891	11.4891	11.4891
4-Hydroxyphenylglycine	11.4891	11.4891	11.4891	11.4891	0	1			11.4891	11.4891	11.4891	11.4891	11.4891	11.4891	11.4891	11.4891	11.4891	11.4891	11.4891	11.4891	11.4891	11.4891	11.4891	11.4891
4-Imidazoleacetate	11.4891	11.4891	11.4891	11.4891	0	1			11.4891	11.4891	11.4891	11.4891	11.4891	11.4891	11.4891	11.4891	11.4891	11.4891	11.4891	11.4891	11.4891	11.4891	11.4891	11.4891
4-Methylcatechol	11.4891	11.4891	11.4891	11.4891	0	1			11.4891	11.4891	11.4891	11.4891	11.4891	11.4891	11.4891	11.4891	11.4891	11.4891	11.4891	11.4891	11.4891	11.4891	11.4891	11.4891
4-Quinolinecarboxylate	14.0456	14.0456	13.9199	13.9199	-0.125703	0.916557			14.7945	13.7945	14.8029	13.7945	13.7945	13.7945	13.7945	13.7945	13.7945	13.7945	13.7945	13.7945	13.7945	13.7945	14.7973	13.7945
4alpha-Hydroxyformyl-4beta-methyl-5alpha-cholest-8-en-3beta-ol	15.9712	15.9712	16.3333	16.3333	0.362121	1.28531			15.9712	15.9712	15.9712	15.9712	15.9712	15.9712	15.9712	15.9712	15.9712	15.9712	15.9712	15.9712	16.9712	17.8681	15.9712	15.9712
5-Aminopentanoate	11.4891	11.4891	11.4891	11.4891	0	1			11.4891	11.4891	11.4891	11.4891	11.4891	11.4891	11.4891	11.4891	11.4891	11.4891	11.4891	11.4891	11.4891	11.4891	11.4891	11.4891
5-Hydroxyindoleacetate	11.4891	11.4891	11.4891	11.4891	0	1			11.4891	11.4891	11.4891	11.4891	11.4891	11.4891	11.4891	11.4891	11.4891	11.4891	11.4891	11.4891	11.4891	11.4891	11.4891	11.4891
5-Hydroxylysine	11.4891	11.4891	11.4891	11.4891	0	1			11.4891	11.4891	11.4891	11.4891	11.4891	11.4891	11.4891	11.4891	11.4891	11.4891	11.4891	11.4891	11.4891	11.4891	11.4891	11.4891
5-Hydroxytryptophan	11.4891	11.4891	11.4891	11.4891	0	1			11.4891	11.4891	11.4891	11.4891	11.4891	11.4891	11.4891	11.4891	11.4891	11.4891	11.4891	11.4891	11.4891	11.4891	11.4891	11.4891
5-Methylcytosine	11.4891	11.4891	11.4891	11.4891	0	1			11.4891	11.4891	11.4891	11.4891	11.4891	11.4891	11.4891	11.4891	11.4891	11.4891	11.4891	11.4891	11.4891	11.4891	11.4891	11.4891
6-Carboxyhexanoate	11.4891	11.4891	11.4891	11.4891	0	1			11.4891	11.4891	11.4891	11.4891	11.4891	11.4891	11.4891	11.4891	11.4891	11.4891	11.4891	11.4891	11.4891	11.4891	11.4891	11.4891
6-Hydroxynicotinate	11.4891	11.4891	11.4891	11.4891	0	1			11.4891	11.4891	11.4891	11.4891	11.4891	11.4891	11.4891	11.4891	11.4891	11.4891	11.4891	11.4891	11.4891	11.4891	11.4891	11.4891
6-Phosphogluconate	11.4891	11.4891	11.4891	11.4891	0	1			11.4891	11.4891	11.4891	11.4891	11.4891	11.4891	11.4891	11.4891	11.4891	11.4891	11.4891	11.4891	11.4891	11.4891	11.4891	11.4891
6-Phosphonogluconolactone	11.4891	11.4891	11.4891	11.4891	0	1			11.4891	11.4891	11.4891	11.4891	11.4891	11.4891	11.4891	11.4891	11.4891	11.4891	11.4891	11.4891	11.4891	11.4891	11.4891	11.4891
7-Methylxanthine	11.4891	11.4891	11.4891	11.4891	0	1			11.4891	11.4891	11.4891	11.4891	11.4891	11.4891	11.4891	11.4891	11.4891	11.4891	11.4891	11.4891	11.4891	11.4891	11.4891	11.4891
Acetoacetate	11.4891	11.4891	11.4891	11.4891	0	1			11.4891	11.4891	11.4891	11.4891	11.4891	11.4891	11.4891	11.4891	11.4891	11.4891	11.4891	11.4891	11.4891	11.4891	11.4891	11.4891
Acetoin	11.4891	11.4891	11.4891	11.4891	0	1			11.4891	11.4891	11.4891	11.4891	11.4891	11.4891	11.4891	11.4891	11.4891	11.4891	11.4891	11.4891	11.4891	11.4891	11.4891	11.4891
Acetyl-CoA	11.4891	11.4891	11.4891	11.4891	0	1			11.4891	11.4891	11.4891	11.4891	11.4891	11.4891	11.4891	11.4891	11.4891	11.4891	11.4891	11.4891	11.4891	11.4891	11.4891	11.4891
Acetylacrylate	11.4891	11.4891	11.4891	11.4891	0	1			11.4891	11.4891	11.4891	11.4891	11.4891	11.4891	11.4891	11.4891	11.4891	11.4891	11.4891	11.4891	11.4891	11.4891	11.4891	11.4891
Adenosine cyclic phosphate	11.4891	11.4891	11.4891	11.4891	0	1			11.4891	11.4891	11.4891	11.4891	11.4891	11.4891	11.4891	11.4891	11.4891	11.4891	11.4891	11.4891	11.4891	11.4891	11.4891	11.4891
Adenylsuccinate	11.4891	11.4891	11.4891	11.4891	0	1			11.4891	11.4891	11.4891	11.4891	11.4891	11.4891	11.4891	11.4891	11.4891	11.4891	11.4891	11.4891	11.4891	11.4891	11.4891	11.4891
Adipate	11.4891	11.4891	11.4891	11.4891	0	1			11.4891	11.4891	11.4891	11.4891	11.4891	11.4891	11.4891	11.4891	11.4891	11.4891	11.4891	11.4891	11.4891	11.4891	11.4891	11.4891
ADP-glucose	11.4891	11.4891	11.4891	11.4891	0	1			11.4891	11.4891	11.4891	11.4891	11.4891	11.4891	11.4891	11.4891	11.4891	11.4891	11.4891	11.4891	11.4891	11.4891	11.4891	11.4891
ADP-ribose phosphate	11.4891	11.4891	11.4891	11.4891	0	1			11.4891	11.4891	11.4891	11.4891	11.4891	11.4891	11.4891	11.4891	11.4891	11.4891	11.4891	11.4891	11.4891	11.4891	11.4891	11.4891
Agmatine sulfate	11.4891	11.4891	11.4891	11.4891	0	1			11.4891	11.4891	11.4891	11.4891	11.4891	11.4891	11.4891	11.4891	11.4891	11.4891	11.4891	11.4891	11.4891	11.4891	11.4891	11.4891
AICAR	11.4891	11.4891	11.4891	11.4891	0	1			11.4891	11.4891	11.4891	11.4891	11.4891	11.4891	11.4891	11.4891	11.4891	11.4891	11.4891	11.4891	11.4891	11.4891	11.4891	11.4891
Ala-Leu	12.4619	12.4619	12.5476	12.5476	0.0856359	1.06116			13.8253	13.8712	11.9998	11.9998	11.9998	11.9998	11.9998	11.9998	11.9998	11.9998	11.9998	11.9998	11.9998	11.9998	15.0265	13.3551
Ala-Tyr	11.4891	11.4891	11.4891	11.4891	0	1			11.4891	11.4891	11.4891	11.4891	11.4891	11.4891	11.4891	11.4891	11.4891	11.4891	11.4891	11.4891	11.4891	11.4891	11.4891	11.4891
Allantoin	14.2968	14.2968	14.6171	14.6171	0.320306	1.24859			14.2968	14.2968	14.2968	14.2968	14.2968	14.2968	14.2968	14.2968	14.2968	14.2968	14.2968	14.2968	14.2968	14.2968	16.8593	14.2968
Allothreonine	11.4891	11.4891	11.4891	11.4891	0	1			11.4891	11.4891	11.4891	11.4891	11.4891	11.4891	11.4891	11.4891	11.4891	11.4891	11.4891	11.4891	11.4891	11.4891	11.4891	11.4891
Aminoadipate	11.4891	11.4891	11.4891	11.4891	0	1			11.4891	11.4891	11.4891	11.4891	11.4891	11.4891	11.4891	11.4891	11.4891	11.4891	11.4891	11.4891	11.4891	11.4891	11.4891	11.4891
Aminocaprylate	11.4891	11.4891	11.4891	11.4891	0	1			11.4891	11.4891	11.4891	11.4891	11.4891	11.4891	11.4891	11.4891	11.4891	11.4891	11.4891	11.4891	11.4891	11.4891	11.4891	11.4891
Aminoisobutanoate	11.4891	11.4891	11.4891	11.4891	0	1			11.4891	11.4891	11.4891	11.4891	11.4891	11.4891	11.4891	11.4891	11.4891	11.4891	11.4891	11.4891	11.4891	11.4891	11.4891	11.4891
Aniline-2-sulfonate	11.4891	11.4891	11.4891	11.4891	0	1			11.4891	11.4891	11.4891	11.4891	11.4891	11.4891	11.4891	11.4891	11.4891	11.4891	11.4891	11.4891	11.4891	11.4891	11.4891	11.4891
Anserine	11.4891	11.4891	11.4891	11.4891	0	1			11.4891	11.4891	11.4891	11.4891	11.4891	11.4891	11.4891	11.4891	11.4891	11.4891	11.4891	11.4891	11.4891	11.4891	11.4891	11.4891
Anthranilate	11.4891	11.4891	11.4891	11.4891	0	1			11.4891	11.4891	11.4891	11.4891	11.4891	11.4891	11.4891	11.4891	11.4891	11.4891	11.4891	11.4891	11.4891	11.4891	11.4891	11.4891
Arg-Ala	11.4891	11.4891	11.4891	11.4891	0	1			11.4891	11.4891	11.4891	11.4891	11.4891	11.4891	11.4891	11.4891	11.4891	11.4891	11.4891	11.4891	11.4891	11.4891	11.4891	11.4891
Asp-Pro	11.4891	11.4891	11.4891	11.4891	0	1			11.4891	11.4891	11.4891	11.4891	11.4891	11.4891	11.4891	11.4891	11.4891	11.4891	11.4891	11.4891	11.4891	11.4891	11.4891	11.4891
Aspartylglycosamine	11.4891	11.4891	11.4891	11.4891	0	1			11.4891	11.4891	11.4891	11.4891	11.4891	11.4891	11.4891	11.4891	11.4891	11.4891	11.4891	11.4891	11.4891	11.4891	11.4891	11.4891
beta-Alanine	11.4891	11.4891	11.4891	11.4891	0	1			11.4891	11.4891	11.4891	11.4891	11.4891	11.4891	11.4891	11.4891	11.4891	11.4891	11.4891	11.4891	11.4891	11.4891	11.4891	11.4891
Betaine	11.4891	11.4891	11.4891	11.4891	0	1			11.4891	11.4891	11.4891	11.4891	11.4891	11.4891	11.4891	11.4891	11.4891	11.4891	11.4891	11.4891	11.4891	11.4891	11.4891	11.4891
Biliverdin	11.4891	11.4891	11.4891	11.4891	0	1			11.4891	11.4891	11.4891	11.4891	11.4891	11.4891	11.4891	11.4891	11.4891	11.4891	11.4891	11.4891	11.4891	11.4891	11.4891	11.4891
Biotin	11.4891	11.4891	11.4891	11.4891	0	1			11.4891	11.4891	11.4891	11.4891	11.4891	11.4891	11.4891	11.4891	11.4891	11.4891	11.4891	11.4891	11.4891	11.4891	11.4891	11.4891
Biotin amide	11.4891	11.4891	11.4891	11.4891	0	1			11.4891	11.4891	11.4891	11.4891	11.4891	11.4891	11.4891	11.4891	11.4891	11.4891	11.4891	11.4891	11.4891	11.4891	11.4891	11.4891
Butanoate	11.4891	11.4891	11.4891	11.4891	0	1			11.4891	11.4891	11.4891	11.4891	11.4891	11.4891	11.4891	11.4891	11.4891	11.4891	11.4891	11.4891	11.4891	11.4891	11.4891	11.4891
Butyryl-CoA	11.4891	11.4891	11.4891	11.4891	0	1			11.4891	11.4891	11.4891	11.4891	11.4891	11.4891	11.4891	11.4891	11.4891	11.4891	11.4891	11.4891	11.4891	11.4891	11.4891	11.4891
Caffeate	11.4891	11.4891	11.4891	11.4891	0	1			11.4891	11.4891	11.4891	11.4891	11.4891	11.4891	11.4891	11.4891	11.4891	11.4891	11.4891	11.4891	11.4891	11.4891	11.4891	11.4891
Carnitine (12:0)	13.9105	13.9105	13.8012	13.8012	-0.109366	0.926995			15.4604	13.5278	14.6568	13.5278	13.5278	13.5278	13.5278	13.5278	13.5278	13.5278	15.7144	13.5278	13.5278	13.5278	13.5278	13.5278
Carnitine (17:0)	14.8441	14.8441	14.9123	14.9123	0.0681799	1.04839			14.7191	14.7191	14.7191	14.7191	14.7191	14.7191	14.7191	15.7191	14.7191	14.7191	14.7191	14.7191	14.7191	14.7191	14.7191	16.2646
Carnitine (18:0)	15.2428	15.2428	15.1515	15.1515	-0.0912914	0.938682			14.9618	15.9618	14.9618	14.9618	16.2097	14.9618	14.9618	14.9618	14.9618	14.9618	14.9618	14.9618	14.9618	14.9618	14.9618	16.4794
Carnitine (20:0)	11.4891	11.4891	11.4891	11.4891	0	1			11.4891	11.4891	11.4891	11.4891	11.4891	11.4891	11.4891	11.4891	11.4891	11.4891	11.4891	11.4891	11.4891	11.4891	11.4891	11.4891
Carnitine (5:0)	18.4171	18.4171	18.4171	18.4171	0	1			18.4171	18.4171	18.4171	18.4171	18.4171	18.4171	18.4171	18.4171	18.4171	18.4171	18.4171	18.4171	18.4171	18.4171	18.4171	18.4171
Carnitine (6:0)	11.4891	11.4891	11.4891	11.4891	0	1			11.4891	11.4891	11.4891	11.4891	11.4891	11.4891	11.4891	11.4891	11.4891	11.4891	11.4891	11.4891	11.4891	11.4891	11.4891	11.4891
Carnitine (8:0)	11.4891	11.4891	11.4891	11.4891	0	1			11.4891	11.4891	11.4891	11.4891	11.4891	11.4891	11.4891	11.4891	11.4891	11.4891	11.4891	11.4891	11.4891	11.4891	11.4891	11.4891
Carnitine (glutaryl)	11.4891	11.4891	11.4891	11.4891	0	1			11.4891	11.4891	11.4891	11.4891	11.4891	11.4891	11.4891	11.4891	11.4891	11.4891	11.4891	11.4891	11.4891	11.4891	11.4891	11.4891
Carnosine	13.3907	13.3907	13.6124	13.6124	0.221721	1.16612			13.1236	13.1236	13.1236	13.1236	13.1236	15.2601	13.1236	13.1236	13.1236	14.9793	13.1236	15.1782	13.1236	13.1236	13.1236	13.1236
Cholate	11.4891	11.4891	11.4891	11.4891	0	1			11.4891	11.4891	11.4891	11.4891	11.4891	11.4891	11.4891	11.4891	11.4891	11.4891	11.4891	11.4891	11.4891	11.4891	11.4891	11.4891
Ciliatine	11.4891	11.4891	11.4891	11.4891	0	1			11.4891	11.4891	11.4891	11.4891	11.4891	11.4891	11.4891	11.4891	11.4891	11.4891	11.4891	11.4891	11.4891	11.4891	11.4891	11.4891
Citrate/Isocitrate	11.4891	11.4891	11.4891	11.4891	0	1			11.4891	11.4891	11.4891	11.4891	11.4891	11.4891	11.4891	11.4891	11.4891	11.4891	11.4891	11.4891	11.4891	11.4891	11.4891	11.4891
Cortexolone	11.4891	11.4891	11.4891	11.4891	0	1			11.4891	11.4891	11.4891	11.4891	11.4891	11.4891	11.4891	11.4891	11.4891	11.4891	11.4891	11.4891	11.4891	11.4891	11.4891	11.4891
Cortisol	11.4891	11.4891	11.4891	11.4891	0	1			11.4891	11.4891	11.4891	11.4891	11.4891	11.4891	11.4891	11.4891	11.4891	11.4891	11.4891	11.4891	11.4891	11.4891	11.4891	11.4891
Cyclic GMP	11.4891	11.4891	11.4891	11.4891	0	1			11.4891	11.4891	11.4891	11.4891	11.4891	11.4891	11.4891	11.4891	11.4891	11.4891	11.4891	11.4891	11.4891	11.4891	11.4891	11.4891
Cystathionine	14.2623	14.2623	14.2623	14.2623	0	1			14.2623	14.2623	14.2623	14.2623	14.2623	14.2623	14.2623	14.2623	14.2623	14.2623	14.2623	14.2623	14.2623	14.2623	14.2623	14.2623
Cysteate	11.4891	11.4891	11.4891	11.4891	0	1			11.4891	11.4891	11.4891	11.4891	11.4891	11.4891	11.4891	11.4891	11.4891	11.4891	11.4891	11.4891	11.4891	11.4891	11.4891	11.4891
Cystine	11.4891	11.4891	11.4891	11.4891	0	1			11.4891	11.4891	11.4891	11.4891	11.4891	11.4891	11.4891	11.4891	11.4891	11.4891	11.4891	11.4891	11.4891	11.4891	11.4891	11.4891
Cytidine	11.4891	11.4891	11.4891	11.4891	0	1			11.4891	11.4891	11.4891	11.4891	11.4891	11.4891	11.4891	11.4891	11.4891	11.4891	11.4891	11.4891	11.4891	11.4891	11.4891	11.4891
Cytidine cyclic phosphate	11.4891	11.4891	11.4891	11.4891	0	1			11.4891	11.4891	11.4891	11.4891	11.4891	11.4891	11.4891	11.4891	11.4891	11.4891	11.4891	11.4891	11.4891	11.4891	11.4891	11.4891
Cytosine	11.4891	11.4891	11.4891	11.4891	0	1			11.4891	11.4891	11.4891	11.4891	11.4891	11.4891	11.4891	11.4891	11.4891	11.4891	11.4891	11.4891	11.4891	11.4891	11.4891	11.4891
Deoxyadenosine	11.4891	11.4891	11.4891	11.4891	0	1			11.4891	11.4891	11.4891	11.4891	11.4891	11.4891	11.4891	11.4891	11.4891	11.4891	11.4891	11.4891	11.4891	11.4891	11.4891	11.4891
Deoxyadenosine monophosphate	11.4891	11.4891	11.4891	11.4891	0	1			11.4891	11.4891	11.4891	11.4891	11.4891	11.4891	11.4891	11.4891	11.4891	11.4891	11.4891	11.4891	11.4891	11.4891	11.4891	11.4891
Deoxyadenosine triphosphate	11.4891	11.4891	11.4891	11.4891	0	1			11.4891	11.4891	11.4891	11.4891	11.4891	11.4891	11.4891	11.4891	11.4891	11.4891	11.4891	11.4891	11.4891	11.4891	11.4891	11.4891
Deoxycholate	11.4891	11.4891	11.4891	11.4891	0	1			11.4891	11.4891	11.4891	11.4891	11.4891	11.4891	11.4891	11.4891	11.4891	11.4891	11.4891	11.4891	11.4891	11.4891	11.4891	11.4891
Deoxycytidine	11.4891	11.4891	11.4891	11.4891	0	1			11.4891	11.4891	11.4891	11.4891	11.4891	11.4891	11.4891	11.4891	11.4891	11.4891	11.4891	11.4891	11.4891	11.4891	11.4891	11.4891
Deoxycytidine diphosphate	11.4891	11.4891	11.4891	11.4891	0	1			11.4891	11.4891	11.4891	11.4891	11.4891	11.4891	11.4891	11.4891	11.4891	11.4891	11.4891	11.4891	11.4891	11.4891	11.4891	11.4891
Deoxycytidine monophosphate	11.4891	11.4891	11.4891	11.4891	0	1			11.4891	11.4891	11.4891	11.4891	11.4891	11.4891	11.4891	11.4891	11.4891	11.4891	11.4891	11.4891	11.4891	11.4891	11.4891	11.4891
Deoxyguanosine	11.4891	11.4891	11.4891	11.4891	0	1			11.4891	11.4891	11.4891	11.4891	11.4891	11.4891	11.4891	11.4891	11.4891	11.4891	11.4891	11.4891	11.4891	11.4891	11.4891	11.4891
Deoxyguanosine diphosphate	11.4891	11.4891	11.4891	11.4891	0	1			11.4891	11.4891	11.4891	11.4891	11.4891	11.4891	11.4891	11.4891	11.4891	11.4891	11.4891	11.4891	11.4891	11.4891	11.4891	11.4891
Deoxyguanosine monophosphate	11.4891	11.4891	11.4891	11.4891	0	1			11.4891	11.4891	11.4891	11.4891	11.4891	11.4891	11.4891	11.4891	11.4891	11.4891	11.4891	11.4891	11.4891	11.4891	11.4891	11.4891
Deoxyinosine	11.4891	11.4891	11.4891	11.4891	0	1			11.4891	11.4891	11.4891	11.4891	11.4891	11.4891	11.4891	11.4891	11.4891	11.4891	11.4891	11.4891	11.4891	11.4891	11.4891	11.4891
Deoxypentose monophosphates	11.4891	11.4891	11.4891	11.4891	0	1			11.4891	11.4891	11.4891	11.4891	11.4891	11.4891	11.4891	11.4891	11.4891	11.4891	11.4891	11.4891	11.4891	11.4891	11.4891	11.4891
Deoxyuridine	11.4891	11.4891	11.4891	11.4891	0	1			11.4891	11.4891	11.4891	11.4891	11.4891	11.4891	11.4891	11.4891	11.4891	11.4891	11.4891	11.4891	11.4891	11.4891	11.4891	11.4891
Deoxyuridine monophosphate	11.4891	11.4891	11.4891	11.4891	0	1			11.4891	11.4891	11.4891	11.4891	11.4891	11.4891	11.4891	11.4891	11.4891	11.4891	11.4891	11.4891	11.4891	11.4891	11.4891	11.4891
Deoxyuridine triphosphate	11.4891	11.4891	11.4891	11.4891	0	1			11.4891	11.4891	11.4891	11.4891	11.4891	11.4891	11.4891	11.4891	11.4891	11.4891	11.4891	11.4891	11.4891	11.4891	11.4891	11.4891
Diaminopimelate	11.4891	11.4891	11.4891	11.4891	0	1			11.4891	11.4891	11.4891	11.4891	11.4891	11.4891	11.4891	11.4891	11.4891	11.4891	11.4891	11.4891	11.4891	11.4891	11.4891	11.4891
Diethanolamine	11.4891	11.4891	11.4891	11.4891	0	1			11.4891	11.4891	11.4891	11.4891	11.4891	11.4891	11.4891	11.4891	11.4891	11.4891	11.4891	11.4891	11.4891	11.4891	11.4891	11.4891
Dihydroorotate	11.4891	11.4891	11.4891	11.4891	0	1			11.4891	11.4891	11.4891	11.4891	11.4891	11.4891	11.4891	11.4891	11.4891	11.4891	11.4891	11.4891	11.4891	11.4891	11.4891	11.4891
Dihydrouracil	11.4891	11.4891	11.4891	11.4891	0	1			11.4891	11.4891	11.4891	11.4891	11.4891	11.4891	11.4891	11.4891	11.4891	11.4891	11.4891	11.4891	11.4891	11.4891	11.4891	11.4891
Dihydroxyacetone phosphate	11.4891	11.4891	11.4891	11.4891	0	1			11.4891	11.4891	11.4891	11.4891	11.4891	11.4891	11.4891	11.4891	11.4891	11.4891	11.4891	11.4891	11.4891	11.4891	11.4891	11.4891
Diphthamide	11.4891	11.4891	11.4891	11.4891	0	1			11.4891	11.4891	11.4891	11.4891	11.4891	11.4891	11.4891	11.4891	11.4891	11.4891	11.4891	11.4891	11.4891	11.4891	11.4891	11.4891
Dopamine	11.4891	11.4891	11.4891	11.4891	0	1			11.4891	11.4891	11.4891	11.4891	11.4891	11.4891	11.4891	11.4891	11.4891	11.4891	11.4891	11.4891	11.4891	11.4891	11.4891	11.4891
dTDP-glucose	11.4891	11.4891	11.4891	11.4891	0	1			11.4891	11.4891	11.4891	11.4891	11.4891	11.4891	11.4891	11.4891	11.4891	11.4891	11.4891	11.4891	11.4891	11.4891	11.4891	11.4891
Epinephrine	11.4891	11.4891	11.4891	11.4891	0	1			11.4891	11.4891	11.4891	11.4891	11.4891	11.4891	11.4891	11.4891	11.4891	11.4891	11.4891	11.4891	11.4891	11.4891	11.4891	11.4891
Erythritol	11.4891	11.4891	11.4891	11.4891	0	1			11.4891	11.4891	11.4891	11.4891	11.4891	11.4891	11.4891	11.4891	11.4891	11.4891	11.4891	11.4891	11.4891	11.4891	11.4891	11.4891
Erythrose 4-phosphate	11.4891	11.4891	11.4891	11.4891	0	1			11.4891	11.4891	11.4891	11.4891	11.4891	11.4891	11.4891	11.4891	11.4891	11.4891	11.4891	11.4891	11.4891	11.4891	11.4891	11.4891
Estradiol 17-alpha	15.6496	15.6496	15.9817	15.9817	0.332117	1.25886			15.6496	15.6496	15.6496	15.6496	15.6496	15.6496	15.6496	15.6496	15.6496	16.731	15.6496	15.6496	15.6496	15.6496	17.2251	15.6496
Ethanolamine	11.4891	11.4891	11.4891	11.4891	0	1			11.4891	11.4891	11.4891	11.4891	11.4891	11.4891	11.4891	11.4891	11.4891	11.4891	11.4891	11.4891	11.4891	11.4891	11.4891	11.4891
Ethylmalonate	11.4891	11.4891	11.4891	11.4891	0	1			11.4891	11.4891	11.4891	11.4891	11.4891	11.4891	11.4891	11.4891	11.4891	11.4891	11.4891	11.4891	11.4891	11.4891	11.4891	11.4891
Ferulate	11.4891	11.4891	11.4891	11.4891	0	1			11.4891	11.4891	11.4891	11.4891	11.4891	11.4891	11.4891	11.4891	11.4891	11.4891	11.4891	11.4891	11.4891	11.4891	11.4891	11.4891
Formylglycine	11.4891	11.4891	11.4891	11.4891	0	1			11.4891	11.4891	11.4891	11.4891	11.4891	11.4891	11.4891	11.4891	11.4891	11.4891	11.4891	11.4891	11.4891	11.4891	11.4891	11.4891
Fructose 1,6-bisphosphate	11.4891	11.4891	11.4891	11.4891	0	1			11.4891	11.4891	11.4891	11.4891	11.4891	11.4891	11.4891	11.4891	11.4891	11.4891	11.4891	11.4891	11.4891	11.4891	11.4891	11.4891
Fucose 1-phosphate	11.4891	11.4891	11.4891	11.4891	0	1			11.4891	11.4891	11.4891	11.4891	11.4891	11.4891	11.4891	11.4891	11.4891	11.4891	11.4891	11.4891	11.4891	11.4891	11.4891	11.4891
Galacturonate	11.4891	11.4891	11.4891	11.4891	0	1			11.4891	11.4891	11.4891	11.4891	11.4891	11.4891	11.4891	11.4891	11.4891	11.4891	11.4891	11.4891	11.4891	11.4891	11.4891	11.4891
Gamma-linolenate	11.4891	11.4891	11.4891	11.4891	0	1			11.4891	11.4891	11.4891	11.4891	11.4891	11.4891	11.4891	11.4891	11.4891	11.4891	11.4891	11.4891	11.4891	11.4891	11.4891	11.4891
Glu-Asp	11.4891	11.4891	11.4891	11.4891	0	1			11.4891	11.4891	11.4891	11.4891	11.4891	11.4891	11.4891	11.4891	11.4891	11.4891	11.4891	11.4891	11.4891	11.4891	11.4891	11.4891
Glu-Gln	11.4891	11.4891	11.4891	11.4891	0	1			11.4891	11.4891	11.4891	11.4891	11.4891	11.4891	11.4891	11.4891	11.4891	11.4891	11.4891	11.4891	11.4891	11.4891	11.4891	11.4891
Glu-Glu	12.441	12.441	12.441	12.441	0	1			12.441	12.441	12.441	12.441	12.441	12.441	12.441	12.441	12.441	12.441	12.441	12.441	12.441	12.441	12.441	12.441
Gluconate	11.4891	11.4891	11.4891	11.4891	0	1			11.4891	11.4891	11.4891	11.4891	11.4891	11.4891	11.4891	11.4891	11.4891	11.4891	11.4891	11.4891	11.4891	11.4891	11.4891	11.4891
Gluconolactone	11.4891	11.4891	11.4891	11.4891	0	1			11.4891	11.4891	11.4891	11.4891	11.4891	11.4891	11.4891	11.4891	11.4891	11.4891	11.4891	11.4891	11.4891	11.4891	11.4891	11.4891
Glucosaminate	11.4891	11.4891	11.4891	11.4891	0	1			11.4891	11.4891	11.4891	11.4891	11.4891	11.4891	11.4891	11.4891	11.4891	11.4891	11.4891	11.4891	11.4891	11.4891	11.4891	11.4891
Glucosamine 6-sulfate	11.4891	11.4891	11.4891	11.4891	0	1			11.4891	11.4891	11.4891	11.4891	11.4891	11.4891	11.4891	11.4891	11.4891	11.4891	11.4891	11.4891	11.4891	11.4891	11.4891	11.4891
Glucose	11.4891	11.4891	11.4891	11.4891	0	1			11.4891	11.4891	11.4891	11.4891	11.4891	11.4891	11.4891	11.4891	11.4891	11.4891	11.4891	11.4891	11.4891	11.4891	11.4891	11.4891
Glucose 1-phosphate	11.4891	11.4891	11.4891	11.4891	0	1			11.4891	11.4891	11.4891	11.4891	11.4891	11.4891	11.4891	11.4891	11.4891	11.4891	11.4891	11.4891	11.4891	11.4891	11.4891	11.4891
Glucuronolactone	12.2001	12.2001	12.1773	12.1773	-0.022803	0.984318			13.8808	11.5853	11.5853	11.5853	11.5853	14.2082	11.5853	11.5853	11.5853	11.5853	11.5853	11.5853	13.5467	11.5853	11.5853	14.3599
Glutarate	11.4891	11.4891	11.4891	11.4891	0	1			11.4891	11.4891	11.4891	11.4891	11.4891	11.4891	11.4891	11.4891	11.4891	11.4891	11.4891	11.4891	11.4891	11.4891	11.4891	11.4891
Gly-Leu	11.4891	11.4891	11.4891	11.4891	0	1			11.4891	11.4891	11.4891	11.4891	11.4891	11.4891	11.4891	11.4891	11.4891	11.4891	11.4891	11.4891	11.4891	11.4891	11.4891	11.4891
Glyceraldehyde	11.4891	11.4891	11.4891	11.4891	0	1			11.4891	11.4891	11.4891	11.4891	11.4891	11.4891	11.4891	11.4891	11.4891	11.4891	11.4891	11.4891	11.4891	11.4891	11.4891	11.4891
Glycerate	11.4891	11.4891	11.4891	11.4891	0	1			11.4891	11.4891	11.4891	11.4891	11.4891	11.4891	11.4891	11.4891	11.4891	11.4891	11.4891	11.4891	11.4891	11.4891	11.4891	11.4891
Glycine	11.4891	11.4891	11.4891	11.4891	0	1			11.4891	11.4891	11.4891	11.4891	11.4891	11.4891	11.4891	11.4891	11.4891	11.4891	11.4891	11.4891	11.4891	11.4891	11.4891	11.4891
Glycochenodeoxycholate	11.4891	11.4891	11.4891	11.4891	0	1			11.4891	11.4891	11.4891	11.4891	11.4891	11.4891	11.4891	11.4891	11.4891	11.4891	11.4891	11.4891	11.4891	11.4891	11.4891	11.4891
Glycocholate	11.4891	11.4891	11.4891	11.4891	0	1			11.4891	11.4891	11.4891	11.4891	11.4891	11.4891	11.4891	11.4891	11.4891	11.4891	11.4891	11.4891	11.4891	11.4891	11.4891	11.4891
Glycolaldehyde	11.4891	11.4891	11.4891	11.4891	0	1			11.4891	11.4891	11.4891	11.4891	11.4891	11.4891	11.4891	11.4891	11.4891	11.4891	11.4891	11.4891	11.4891	11.4891	11.4891	11.4891
Guanidinoacetate	11.4891	11.4891	11.4891	11.4891	0	1			11.4891	11.4891	11.4891	11.4891	11.4891	11.4891	11.4891	11.4891	11.4891	11.4891	11.4891	11.4891	11.4891	11.4891	11.4891	11.4891
Guanidinosuccinate	11.4891	11.4891	11.4891	11.4891	0	1			11.4891	11.4891	11.4891	11.4891	11.4891	11.4891	11.4891	11.4891	11.4891	11.4891	11.4891	11.4891	11.4891	11.4891	11.4891	11.4891
Guanine	11.4891	11.4891	11.4891	11.4891	0	1			11.4891	11.4891	11.4891	11.4891	11.4891	11.4891	11.4891	11.4891	11.4891	11.4891	11.4891	11.4891	11.4891	11.4891	11.4891	11.4891
Guanosine	11.4891	11.4891	11.4891	11.4891	0	1			11.4891	11.4891	11.4891	11.4891	11.4891	11.4891	11.4891	11.4891	11.4891	11.4891	11.4891	11.4891	11.4891	11.4891	11.4891	11.4891
Guanosine diphosphate	11.4891	11.4891	11.4891	11.4891	0	1			11.4891	11.4891	11.4891	11.4891	11.4891	11.4891	11.4891	11.4891	11.4891	11.4891	11.4891	11.4891	11.4891	11.4891	11.4891	11.4891
Gulonolactone	11.4891	11.4891	11.4891	11.4891	0	1			11.4891	11.4891	11.4891	11.4891	11.4891	11.4891	11.4891	11.4891	11.4891	11.4891	11.4891	11.4891	11.4891	11.4891	11.4891	11.4891
Hexarates	11.4891	11.4891	11.4891	11.4891	0	1			11.4891	11.4891	11.4891	11.4891	11.4891	11.4891	11.4891	11.4891	11.4891	11.4891	11.4891	11.4891	11.4891	11.4891	11.4891	11.4891
Hippurate	11.4891	11.4891	11.4891	11.4891	0	1			11.4891	11.4891	11.4891	11.4891	11.4891	11.4891	11.4891	11.4891	11.4891	11.4891	11.4891	11.4891	11.4891	11.4891	11.4891	11.4891
Histamine	11.4891	11.4891	11.4891	11.4891	0	1			11.4891	11.4891	11.4891	11.4891	11.4891	11.4891	11.4891	11.4891	11.4891	11.4891	11.4891	11.4891	11.4891	11.4891	11.4891	11.4891
Histidinol	11.4891	11.4891	11.4891	11.4891	0	1			11.4891	11.4891	11.4891	11.4891	11.4891	11.4891	11.4891	11.4891	11.4891	11.4891	11.4891	11.4891	11.4891	11.4891	11.4891	11.4891
Homoarginine	11.4891	11.4891	11.4891	11.4891	0	1			11.4891	11.4891	11.4891	11.4891	11.4891	11.4891	11.4891	11.4891	11.4891	11.4891	11.4891	11.4891	11.4891	11.4891	11.4891	11.4891
Homocysteine	11.4891	11.4891	11.4891	11.4891	0	1			11.4891	11.4891	11.4891	11.4891	11.4891	11.4891	11.4891	11.4891	11.4891	11.4891	11.4891	11.4891	11.4891	11.4891	11.4891	11.4891
Homocysteine thiolactone	15.3227	15.3227	15.649	15.649	0.326339	1.25383			15.0605	17.1577	15.0605	15.0605	15.0605	15.0605	15.0605	15.0605	17.8467	15.0605	15.0605	15.0605	15.0605	15.0605	16.9823	15.0605
Homocystine	11.4891	11.4891	11.4891	11.4891	0	1			11.4891	11.4891	11.4891	11.4891	11.4891	11.4891	11.4891	11.4891	11.4891	11.4891	11.4891	11.4891	11.4891	11.4891	11.4891	11.4891
Homogentisate	11.4891	11.4891	11.4891	11.4891	0	1			11.4891	11.4891	11.4891	11.4891	11.4891	11.4891	11.4891	11.4891	11.4891	11.4891	11.4891	11.4891	11.4891	11.4891	11.4891	11.4891
Homoserine	11.4891	11.4891	11.4891	11.4891	0	1			11.4891	11.4891	11.4891	11.4891	11.4891	11.4891	11.4891	11.4891	11.4891	11.4891	11.4891	11.4891	11.4891	11.4891	11.4891	11.4891
Homovanillate	11.4891	11.4891	11.4891	11.4891	0	1			11.4891	11.4891	11.4891	11.4891	11.4891	11.4891	11.4891	11.4891	11.4891	11.4891	11.4891	11.4891	11.4891	11.4891	11.4891	11.4891
Hydroquinone	11.4891	11.4891	11.4891	11.4891	0	1			11.4891	11.4891	11.4891	11.4891	11.4891	11.4891	11.4891	11.4891	11.4891	11.4891	11.4891	11.4891	11.4891	11.4891	11.4891	11.4891
Hydroxy-FA (6:0)	11.4891	11.4891	11.4891	11.4891	0	1			11.4891	11.4891	11.4891	11.4891	11.4891	11.4891	11.4891	11.4891	11.4891	11.4891	11.4891	11.4891	11.4891	11.4891	11.4891	11.4891
Hydroxycitrate	11.4891	11.4891	11.4891	11.4891	0	1			11.4891	11.4891	11.4891	11.4891	11.4891	11.4891	11.4891	11.4891	11.4891	11.4891	11.4891	11.4891	11.4891	11.4891	11.4891	11.4891
Hydroxyphenyllactate	11.4891	11.4891	11.4891	11.4891	0	1			11.4891	11.4891	11.4891	11.4891	11.4891	11.4891	11.4891	11.4891	11.4891	11.4891	11.4891	11.4891	11.4891	11.4891	11.4891	11.4891
Indole-3-acetamide	11.4891	11.4891	11.4891	11.4891	0	1			11.4891	11.4891	11.4891	11.4891	11.4891	11.4891	11.4891	11.4891	11.4891	11.4891	11.4891	11.4891	11.4891	11.4891	11.4891	11.4891
Indole-3-acetate	11.4891	11.4891	11.4891	11.4891	0	1			11.4891	11.4891	11.4891	11.4891	11.4891	11.4891	11.4891	11.4891	11.4891	11.4891	11.4891	11.4891	11.4891	11.4891	11.4891	11.4891
Indole-3-ethanol	11.4891	11.4891	11.4891	11.4891	0	1			11.4891	11.4891	11.4891	11.4891	11.4891	11.4891	11.4891	11.4891	11.4891	11.4891	11.4891	11.4891	11.4891	11.4891	11.4891	11.4891
Indole-3-methyl acetate	11.4891	11.4891	11.4891	11.4891	0	1			11.4891	11.4891	11.4891	11.4891	11.4891	11.4891	11.4891	11.4891	11.4891	11.4891	11.4891	11.4891	11.4891	11.4891	11.4891	11.4891
Indole-3-pyruvate	11.4891	11.4891	11.4891	11.4891	0	1			11.4891	11.4891	11.4891	11.4891	11.4891	11.4891	11.4891	11.4891	11.4891	11.4891	11.4891	11.4891	11.4891	11.4891	11.4891	11.4891
Indoleacetaldehyde	11.4891	11.4891	11.4891	11.4891	0	1			11.4891	11.4891	11.4891	11.4891	11.4891	11.4891	11.4891	11.4891	11.4891	11.4891	11.4891	11.4891	11.4891	11.4891	11.4891	11.4891
Indoxyl sulfate	11.4891	11.4891	11.4891	11.4891	0	1			11.4891	11.4891	11.4891	11.4891	11.4891	11.4891	11.4891	11.4891	11.4891	11.4891	11.4891	11.4891	11.4891	11.4891	11.4891	11.4891
Inosine	11.4891	11.4891	11.4891	11.4891	0	1			11.4891	11.4891	11.4891	11.4891	11.4891	11.4891	11.4891	11.4891	11.4891	11.4891	11.4891	11.4891	11.4891	11.4891	11.4891	11.4891
Inosine diphosphate	11.4891	11.4891	11.4891	11.4891	0	1			11.4891	11.4891	11.4891	11.4891	11.4891	11.4891	11.4891	11.4891	11.4891	11.4891	11.4891	11.4891	11.4891	11.4891	11.4891	11.4891
Isopentenyl pyrophosphate	11.4891	11.4891	11.4891	11.4891	0	1			11.4891	11.4891	11.4891	11.4891	11.4891	11.4891	11.4891	11.4891	11.4891	11.4891	11.4891	11.4891	11.4891	11.4891	11.4891	11.4891
Ketoleucine	11.4891	11.4891	11.4891	11.4891	0	1			11.4891	11.4891	11.4891	11.4891	11.4891	11.4891	11.4891	11.4891	11.4891	11.4891	11.4891	11.4891	11.4891	11.4891	11.4891	11.4891
Kynurenate	11.4891	11.4891	11.4891	11.4891	0	1			11.4891	11.4891	11.4891	11.4891	11.4891	11.4891	11.4891	11.4891	11.4891	11.4891	11.4891	11.4891	11.4891	11.4891	11.4891	11.4891
Kynurenine	11.4891	11.4891	11.4891	11.4891	0	1			11.4891	11.4891	11.4891	11.4891	11.4891	11.4891	11.4891	11.4891	11.4891	11.4891	11.4891	11.4891	11.4891	11.4891	11.4891	11.4891
L-DOPA	11.4891	11.4891	11.4891	11.4891	0	1			11.4891	11.4891	11.4891	11.4891	11.4891	11.4891	11.4891	11.4891	11.4891	11.4891	11.4891	11.4891	11.4891	11.4891	11.4891	11.4891
Lactose	11.4891	11.4891	11.4891	11.4891	0	1			11.4891	11.4891	11.4891	11.4891	11.4891	11.4891	11.4891	11.4891	11.4891	11.4891	11.4891	11.4891	11.4891	11.4891	11.4891	11.4891
Leu-Val	11.4891	11.4891	11.4891	11.4891	0	1			11.4891	11.4891	11.4891	11.4891	11.4891	11.4891	11.4891	11.4891	11.4891	11.4891	11.4891	11.4891	11.4891	11.4891	11.4891	11.4891
Liothyronine	11.4891	11.4891	11.4891	11.4891	0	1			11.4891	11.4891	11.4891	11.4891	11.4891	11.4891	11.4891	11.4891	11.4891	11.4891	11.4891	11.4891	11.4891	11.4891	11.4891	11.4891
Lipoamide	11.4891	11.4891	11.4891	11.4891	0	1			11.4891	11.4891	11.4891	11.4891	11.4891	11.4891	11.4891	11.4891	11.4891	11.4891	11.4891	11.4891	11.4891	11.4891	11.4891	11.4891
Lithocholate	11.4891	11.4891	11.4891	11.4891	0	1			11.4891	11.4891	11.4891	11.4891	11.4891	11.4891	11.4891	11.4891	11.4891	11.4891	11.4891	11.4891	11.4891	11.4891	11.4891	11.4891
Lithocholyltaurine	11.4891	11.4891	11.4891	11.4891	0	1			11.4891	11.4891	11.4891	11.4891	11.4891	11.4891	11.4891	11.4891	11.4891	11.4891	11.4891	11.4891	11.4891	11.4891	11.4891	11.4891
Lyso-PC (18:2)	14.5101	14.5101	14.4692	14.4692	-0.0408623	0.972074			14.3002	14.3002	15.979	14.3002	14.3002	14.3002	14.3002	14.3002	14.3002	14.3002	14.3002	15.6521	14.3002	14.3002	14.3002	14.3002
Lyso-PC (22:4)	11.4891	11.4891	11.4891	11.4891	0	1			11.4891	11.4891	11.4891	11.4891	11.4891	11.4891	11.4891	11.4891	11.4891	11.4891	11.4891	11.4891	11.4891	11.4891	11.4891	11.4891
Lyso-PG (18:1)	11.4891	11.4891	11.4891	11.4891	0	1			11.4891	11.4891	11.4891	11.4891	11.4891	11.4891	11.4891	11.4891	11.4891	11.4891	11.4891	11.4891	11.4891	11.4891	11.4891	11.4891
Maleate	11.4891	11.4891	11.4891	11.4891	0	1			11.4891	11.4891	11.4891	11.4891	11.4891	11.4891	11.4891	11.4891	11.4891	11.4891	11.4891	11.4891	11.4891	11.4891	11.4891	11.4891
Mandelate	11.4891	11.4891	11.4891	11.4891	0	1			11.4891	11.4891	11.4891	11.4891	11.4891	11.4891	11.4891	11.4891	11.4891	11.4891	11.4891	11.4891	11.4891	11.4891	11.4891	11.4891
Mannose 6-phosphate	11.4891	11.4891	11.4891	11.4891	0	1			11.4891	11.4891	11.4891	11.4891	11.4891	11.4891	11.4891	11.4891	11.4891	11.4891	11.4891	11.4891	11.4891	11.4891	11.4891	11.4891
Melatonin	11.4891	11.4891	11.4891	11.4891	0	1			11.4891	11.4891	11.4891	11.4891	11.4891	11.4891	11.4891	11.4891	11.4891	11.4891	11.4891	11.4891	11.4891	11.4891	11.4891	11.4891
Melibiose	11.4891	11.4891	11.4891	11.4891	0	1			11.4891	11.4891	11.4891	11.4891	11.4891	11.4891	11.4891	11.4891	11.4891	11.4891	11.4891	11.4891	11.4891	11.4891	11.4891	11.4891
Mesoxalate	11.4891	11.4891	11.4891	11.4891	0	1			11.4891	11.4891	11.4891	11.4891	11.4891	11.4891	11.4891	11.4891	11.4891	11.4891	11.4891	11.4891	11.4891	11.4891	11.4891	11.4891
Met-Leu	11.4891	11.4891	11.4891	11.4891	0	1			11.4891	11.4891	11.4891	11.4891	11.4891	11.4891	11.4891	11.4891	11.4891	11.4891	11.4891	11.4891	11.4891	11.4891	11.4891	11.4891
Methacholine	14.4644	14.4644	14.3394	14.3394	-0.125	0.917004			14.3394	15.3394	14.3394	14.3394	14.3394	14.3394	14.3394	14.3394	14.3394	14.3394	14.3394	14.3394	14.3394	14.3394	14.3394	14.3394
Methionine sulfoximine	11.4891	11.4891	11.4891	11.4891	0	1			11.4891	11.4891	11.4891	11.4891	11.4891	11.4891	11.4891	11.4891	11.4891	11.4891	11.4891	11.4891	11.4891	11.4891	11.4891	11.4891
Methyglutarate	11.4891	11.4891	11.4891	11.4891	0	1			11.4891	11.4891	11.4891	11.4891	11.4891	11.4891	11.4891	11.4891	11.4891	11.4891	11.4891	11.4891	11.4891	11.4891	11.4891	11.4891
Methyl 4-aminobutyrate	11.4891	11.4891	11.4891	11.4891	0	1			11.4891	11.4891	11.4891	11.4891	11.4891	11.4891	11.4891	11.4891	11.4891	11.4891	11.4891	11.4891	11.4891	11.4891	11.4891	11.4891
Methylguanine	11.4891	11.4891	11.4891	11.4891	0	1			11.4891	11.4891	11.4891	11.4891	11.4891	11.4891	11.4891	11.4891	11.4891	11.4891	11.4891	11.4891	11.4891	11.4891	11.4891	11.4891
Methylmalonate	11.4891	11.4891	11.4891	11.4891	0	1			11.4891	11.4891	11.4891	11.4891	11.4891	11.4891	11.4891	11.4891	11.4891	11.4891	11.4891	11.4891	11.4891	11.4891	11.4891	11.4891
Mevalonate	11.4891	11.4891	11.4891	11.4891	0	1			11.4891	11.4891	11.4891	11.4891	11.4891	11.4891	11.4891	11.4891	11.4891	11.4891	11.4891	11.4891	11.4891	11.4891	11.4891	11.4891
Monoethylmalonate	11.4891	11.4891	11.4891	11.4891	0	1			11.4891	11.4891	11.4891	11.4891	11.4891	11.4891	11.4891	11.4891	11.4891	11.4891	11.4891	11.4891	11.4891	11.4891	11.4891	11.4891
Monomethylglutarate	11.4891	11.4891	11.4891	11.4891	0	1			11.4891	11.4891	11.4891	11.4891	11.4891	11.4891	11.4891	11.4891	11.4891	11.4891	11.4891	11.4891	11.4891	11.4891	11.4891	11.4891
N-Acetylalanine	11.4891	11.4891	11.4891	11.4891	0	1			11.4891	11.4891	11.4891	11.4891	11.4891	11.4891	11.4891	11.4891	11.4891	11.4891	11.4891	11.4891	11.4891	11.4891	11.4891	11.4891
N-Acetylasparagine	11.4891	11.4891	11.4891	11.4891	0	1			11.4891	11.4891	11.4891	11.4891	11.4891	11.4891	11.4891	11.4891	11.4891	11.4891	11.4891	11.4891	11.4891	11.4891	11.4891	11.4891
N-Acetylcysteine	11.4891	11.4891	11.4891	11.4891	0	1			11.4891	11.4891	11.4891	11.4891	11.4891	11.4891	11.4891	11.4891	11.4891	11.4891	11.4891	11.4891	11.4891	11.4891	11.4891	11.4891
N-Acetylglutamate	11.4891	11.4891	11.4891	11.4891	0	1			11.4891	11.4891	11.4891	11.4891	11.4891	11.4891	11.4891	11.4891	11.4891	11.4891	11.4891	11.4891	11.4891	11.4891	11.4891	11.4891
N-Acetylglycine	11.4891	11.4891	11.4891	11.4891	0	1			11.4891	11.4891	11.4891	11.4891	11.4891	11.4891	11.4891	11.4891	11.4891	11.4891	11.4891	11.4891	11.4891	11.4891	11.4891	11.4891
N-Acetylhexosamine	11.4891	11.4891	11.4891	11.4891	0	1			11.4891	11.4891	11.4891	11.4891	11.4891	11.4891	11.4891	11.4891	11.4891	11.4891	11.4891	11.4891	11.4891	11.4891	11.4891	11.4891
N-Acetylhexosamine sulfate	11.4891	11.4891	11.4891	11.4891	0	1			11.4891	11.4891	11.4891	11.4891	11.4891	11.4891	11.4891	11.4891	11.4891	11.4891	11.4891	11.4891	11.4891	11.4891	11.4891	11.4891
N-Acetylleucine	11.4891	11.4891	11.4891	11.4891	0	1			11.4891	11.4891	11.4891	11.4891	11.4891	11.4891	11.4891	11.4891	11.4891	11.4891	11.4891	11.4891	11.4891	11.4891	11.4891	11.4891
N-Acetylneuraminate	11.4891	11.4891	11.4891	11.4891	0	1			11.4891	11.4891	11.4891	11.4891	11.4891	11.4891	11.4891	11.4891	11.4891	11.4891	11.4891	11.4891	11.4891	11.4891	11.4891	11.4891
N-Acetylornithine	11.4891	11.4891	11.4891	11.4891	0	1			11.4891	11.4891	11.4891	11.4891	11.4891	11.4891	11.4891	11.4891	11.4891	11.4891	11.4891	11.4891	11.4891	11.4891	11.4891	11.4891
N-Acetylphenylalanine	11.4891	11.4891	11.4891	11.4891	0	1			11.4891	11.4891	11.4891	11.4891	11.4891	11.4891	11.4891	11.4891	11.4891	11.4891	11.4891	11.4891	11.4891	11.4891	11.4891	11.4891
N-Acetylproline	11.4891	11.4891	11.4891	11.4891	0	1			11.4891	11.4891	11.4891	11.4891	11.4891	11.4891	11.4891	11.4891	11.4891	11.4891	11.4891	11.4891	11.4891	11.4891	11.4891	11.4891
N-Acetylputrescine	11.4891	11.4891	11.4891	11.4891	0	1			11.4891	11.4891	11.4891	11.4891	11.4891	11.4891	11.4891	11.4891	11.4891	11.4891	11.4891	11.4891	11.4891	11.4891	11.4891	11.4891
N-Acetylserine	11.4891	11.4891	11.4891	11.4891	0	1			11.4891	11.4891	11.4891	11.4891	11.4891	11.4891	11.4891	11.4891	11.4891	11.4891	11.4891	11.4891	11.4891	11.4891	11.4891	11.4891
N-Acetylserotonin	11.4891	11.4891	11.4891	11.4891	0	1			11.4891	11.4891	11.4891	11.4891	11.4891	11.4891	11.4891	11.4891	11.4891	11.4891	11.4891	11.4891	11.4891	11.4891	11.4891	11.4891
N-Acetyltryptophan	11.4891	11.4891	11.4891	11.4891	0	1			11.4891	11.4891	11.4891	11.4891	11.4891	11.4891	11.4891	11.4891	11.4891	11.4891	11.4891	11.4891	11.4891	11.4891	11.4891	11.4891
N-alpha-Acetyllysine	11.4891	11.4891	11.4891	11.4891	0	1			11.4891	11.4891	11.4891	11.4891	11.4891	11.4891	11.4891	11.4891	11.4891	11.4891	11.4891	11.4891	11.4891	11.4891	11.4891	11.4891
N-Methylaspartate	11.4891	11.4891	11.4891	11.4891	0	1			11.4891	11.4891	11.4891	11.4891	11.4891	11.4891	11.4891	11.4891	11.4891	11.4891	11.4891	11.4891	11.4891	11.4891	11.4891	11.4891
N-Methylglutamate	11.4891	11.4891	11.4891	11.4891	0	1			11.4891	11.4891	11.4891	11.4891	11.4891	11.4891	11.4891	11.4891	11.4891	11.4891	11.4891	11.4891	11.4891	11.4891	11.4891	11.4891
N-Methyltryptamine	11.4891	11.4891	11.4891	11.4891	0	1			11.4891	11.4891	11.4891	11.4891	11.4891	11.4891	11.4891	11.4891	11.4891	11.4891	11.4891	11.4891	11.4891	11.4891	11.4891	11.4891
N-Ribosylnicotinamide	11.4891	11.4891	11.4891	11.4891	0	1			11.4891	11.4891	11.4891	11.4891	11.4891	11.4891	11.4891	11.4891	11.4891	11.4891	11.4891	11.4891	11.4891	11.4891	11.4891	11.4891
N,N-Dimethyllysine	11.4891	11.4891	11.4891	11.4891	0	1			11.4891	11.4891	11.4891	11.4891	11.4891	11.4891	11.4891	11.4891	11.4891	11.4891	11.4891	11.4891	11.4891	11.4891	11.4891	11.4891
[truncated: 94 more rows]

## Sheet: AML_Pipetted_vs_ALL_Pipetted
Metabolite	AML_Pipetted_log2_Mean	AML_Pipetted_log2_Adjusted_Mean	ALL_Pipetted_log2_Mean	ALL_Pipetted_log2_Adjusted_Mean	Log2 Fold Change (ALL pipetted / AML pipetted)	Fold Change (ALL pipetted / AML pipetted)	P	FDR	AML_Pipetted_1	AML_Pipetted_2	AML_Pipetted_3	AML_Pipetted_4	AML_Pipetted_5	AML_Pipetted_6	AML_Pipetted_7	AML_Pipetted_8	ALL_Pipetted_1	ALL_Pipetted_2	ALL_Pipetted_3	ALL_Pipetted_4	ALL_Pipetted_5	ALL_Pipetted_6	ALL_Pipetted_7	ALL_Pipetted_8
[truncated: 571 more rows]

[truncated: 1 more sheets: AML_Sorted_vs_ALL_Sorted]
