# Supplementary material for: Metabolomic profiling of rare cell populations isolated by flow cytometry from tissues
Source: eLife. 2021 Jan 20;10:e61980. doi: 10.7554/eLife.61980 (PMC7847306; doi:10.7554/eLife.61980)
Supplement: Figure 2—source data 1. [file elife-61980-fig2-data1.xlsx]

## Sheet: 2A
Metabolites detected above background from 10,000 HSC/MPPs or 10,000 whole bone marrow cells.
	WBM	WBM	WBM	WBM
	Mice 1,3,5,6	Mice 8,10,11	Mice 13,14,16,17	Mice 19,20,22,23
	136	144	139	168
Experiment #	1	2	3	4
	HSC/MPP	HSC/MPP	HSC/MPP	HSC/MPP
	Mice 1-7	Mice 8-12	Mice 13-18	Mice 19-24
	153	149	155	181
Experiment #	1	2	3	4
Table Analyzed	1Factor_fully paired_Count_AboveBlank_HSCMPP_WBM_V3_07062020
Column B	WBM
vs.	vs.
Column A	HSC/MPP
Paired t test
P value	0.0183
P value summary	*
Significantly different (P < 0.05)?	Yes
One- or two-tailed P value?	Two-tailed
t, df	t=4.688, df=3
Number of pairs	4
How big is the difference?
Mean of differences (B - A)	-12.75
SD of differences	5.439
SEM of differences	2.72
95% confidence interval	-21.40 to -4.095
R squared (partial eta squared)	0.8799
How effective was the pairing?
Correlation coefficient (r)	0.9301
P value (one tailed)	0.0349
P value summary	*
Was the pairing significantly effective?	Yes
Normality of Residuals
Test name	Statistics	P value	Passed normality test (alpha=0.05)?	P value summary
Anderson-Darling (A2*)	N too small
D'Agostino-Pearson omnibus (K2)	N too small
Shapiro-Wilk (W)	0.8619	0.2672	Yes	ns
Kolmogorov-Smirnov (distance)	N too small

## Sheet: 2B
Log2 transformed, normalized values for heatmap comparing metabolites that significantly differed (FDR < 0.01, FC > 2.5) between HSCs/MPPs and whole bone marrow cells.
Feature	WBM_log2_Mean	WBM_log2_Adjusted_Mean	HSC-MPP_log2_Mean	HSC-MPP_log2_Adjusted_Mean	Fold Change (HSC-MPP / WBM)	Fold Change (HSC-MPP / WBM)	P	FDR	WBM1	WBM2	WBM3	WBM4	WBM5	WBM6	WBM7	WBM9	WBM10	WBM12	WBM13	HSC-MPP1	HSC-MPP2	HSC-MPP3	HSC-MPP4	HSC-MPP5	HSC-MPP6	HSC-MPP7	HSC-MPP9	HSC-MPP10	HSC-MPP12	HSC-MPP13
PC(18:0/18:0)	25.2393	25.2393	16.8799	16.8799	-8.35944	0.00304479	8.80433e-17	1.62146e-15	25.2093	25.1912	25.3559	25.6484	25.3801	25.2967	25.6471	25.4831	24.948	24.7343	24.7381	18.2107	19.264	18.4165	15.0966	18.1733	15.0966	18.3005	17.8304	15.0966	15.0966	15.0966
Uric acid	20.5674	20.5674	14.782	14.782	-5.78549	0.0181299	6.35259e-07	2.5248e-06	20.7512	21.6808	21.4231	21.5047	22.1314	20.6131	21.8825	22.2684	21.7404	14.4545	17.7918	16.1645	12.9275	15.9883	18.9528	12.9275	16.9199	17.0111	12.9275	12.9275	12.9275	12.9275
N-Ribosylnicotinamide	17.6973	17.6973	12.8867	12.8867	-4.81063	0.0356333	5.67185e-13	5.22283e-12	18.2262	16.0541	18.6688	18.8131	18.5932	18.4502	18.2155	16.3285	15.4494	18.0851	17.7861	11.9231	11.9231	14.6774	14.6881	11.9231	14.2988	13.5386	11.9231	11.9231	13.0121	11.9231
Acetyl-hexosamine-sulfate	16.9728	16.9728	13.0643	13.0643	-3.90857	0.0665892	2.08649e-07	8.86759e-07	18.7901	18.8589	18.694	18.5981	14.1424	15.4431	15.4702	16.053	14.1929	18.3222	18.1362	15.5152	11.8034	11.8034	11.8034	15.3417	13.8294	11.8034	14.0319	11.8034	14.1683	11.8034
2'_3'-CyclicCMP	19.9884	19.9884	16.2906	16.2906	-3.69786	0.0770605	9.11448e-09	5.03575e-08	20.2101	20.041	20.2144	20.1264	20.523	20.6199	20.1694	18.8239	18.8146	20.3307	19.9994	15.5208	13.8362	13.8362	13.8362	19.6331	20.3129	19.2568	17.9549	14.8362	16.3367	13.8362
Argininosuccinic acid	15.9741	15.9741	12.3506	12.3506	-3.62351	0.0811365	1.05153e-08	5.53306e-08	17.2704	17.4373	17.4154	16.1485	14.7552	16.1862	14.4975	16.5508	11.8015	17.079	16.5735	13.6995	13.8626	11.8015	11.8015	11.8015	11.8015	11.8015	11.8015	11.8015	13.8827	11.8015
Inosine-5'-monophosphate (IMP)	20.5084	20.5084	17.2418	17.2418	-3.26661	0.103909	2.19353e-15	3.46264e-14	21.1695	20.754	20.8897	21.4584	20.0467	20.8959	20.4768	19.1532	19.5828	20.6145	20.5512	19.9313	17.9288	16.88	18.2949	15.7347	16.1246	15.6027	17.1095	18.0889	15.8289	18.1358
DL-Stachydrine	24.405	24.405	21.2213	21.2213	-3.18369	0.110056	1.60497e-08	7.8822e-08	24.7573	24.4725	24.4228	24.5421	24.6894	24.4076	21.3491	25.1583	24.7536	25.066	24.836	21.1015	21.1757	21.8161	21.4517	20.814	20.5354	20.7562	22.3673	21.7042	20.6971	21.0148
2-(alpha-D-Mannosyl)-3-phosphoglycerate	20.8267	20.8267	17.7469	17.7469	-3.07973	0.118279	6.2236e-15	8.09068e-14	21.6091	21.0169	21.2756	21.7852	20.3365	20.9851	20.9775	19.5693	19.9582	20.69	20.8898	19.9534	18.2048	16.726	19.1765	16.7871	17.0138	16.6609	17.6655	18.5855	16.7979	17.6448
AICAR	12.9075	12.9075	9.88446	9.88446	-3.02303	0.123021	1.47229e-08	7.39493e-08	13.4349	12.861	13.2431	12.6053	13.82	12.8006	15.0874	10.964	12.1019	12.5025	12.5617	12.4328	10.1367	8.60557	10.6216	8.60557	8.60557	8.60557	11.0287	10.6569	8.60557	10.8246
PS (38:6)	20.6038	20.6038	17.8105	17.8105	-2.79327	0.144259	3.44279e-08	1.61884e-07	19.8614	20.6336	20.7382	19.7445	21.0124	20.3355	19.1149	21.2424	20.9336	21.6363	21.389	19.7011	16.9528	15.2112	17.2352	16.7281	16.2112	15.2112	19.3528	19.6141	20.2337	19.4641
3-Hydroxycarnitine (18:1)	20.6761	20.6761	18.1436	18.1436	-2.53252	0.172837	3.97117e-06	1.3713e-05	20.8868	20.9275	21.3078	20.0089	20.9628	20.8232	20.6203	20.6775	20.2693	20.7807	20.172	18.6478	17.9654	16.6402	15.6402	19.133	18.5289	18.6098	17.9275	19.6087	17.505	19.3728
PS (34:2)	21.8108	21.8108	19.3375	19.3375	-2.47331	0.180077	4.52484e-15	6.61253e-14	22.0398	21.9593	21.7293	22.0367	21.7078	21.9441	22.0449	21.8523	21.2196	21.694	21.6912	20.4979	18.891	17.3575	19.7099	18.443	19.559	17.7014	20.0287	19.4339	20.57	20.5201
4alpha-formyl-4beta-methyl-5alpha-8-cholesten-3beta-ol	21.6841	21.6841	19.2461	19.2461	-2.43795	0.184545	0.000225604	0.000664779	23.0447	22.0416	22.6854	22.9301	20.9222	21.2377	21.1019	23.6007	20.5487	20.2934	20.1186	21.511	18.9295	20.6966	21.937	20.3567	18.7257	19.8999	22.8816	22.197	11.7862	12.7862
DL-Carnitine	26.3737	26.3737	24.1022	24.1022	-2.27144	0.207124	9.61551e-15	1.11844e-13	26.4778	26.2761	26.0456	26.1183	26.5292	26.3373	25.4215	26.8169	26.7776	26.6727	26.6374	24.3705	24.6086	24.7521	24.1456	24.0385	24.4609	24.1733	23.2856	23.57	23.7343	23.985
Isoleucine/ Leucine	21.4135	21.4135	19.3491	19.3491	-2.06443	0.239081	0.000903716	0.00229565	21.44	21.7246	21.3993	21.3244	21.5273	21.4925	21.7295	21.72	20.7389	21.5655	20.8865	18.8956	18.8956	18.8956	18.8956	18.8956	18.8956	21.475	18.8956	18.8956	21.3045	18.8956
PC (36:4)	23.8201	23.8201	21.8005	21.8005	-2.01968	0.246614	5.22819e-09	3.12278e-08	23.773	23.9362	23.7383	24.434	23.9339	23.8346	24.5939	24.0516	23.6872	22.914	23.1248	22.5286	22.0838	22.6352	22.5873	21.7265	21.9874	22.0258	21.1455	21.4724	21.315	20.2975
Propionylcarnitine	24.1749	24.1749	22.2326	22.2326	-1.94226	0.260208	2.39983e-10	1.71085e-09	24.2172	23.7772	23.708	24.0492	24.1871	24.786	23.8893	24.9704	24.8437	23.6894	23.8062	23.2457	22.4027	22.8959	22.7016	22.9896	22.2674	22.378	21.4818	21.7178	20.9476	21.5307
N6,N6,N6-Trimethyl-L-lysine	21.0027	21.0027	19.0906	19.0906	-1.91216	0.265694	1.1608e-06	4.34809e-06	21.2192	19.6262	21.1678	21.266	21.033	20.8315	22.0853	20.7882	20.7045	21.2029	21.1056	19.5862	18.848	19.8441	19.0609	19.8386	19.2837	19.3181	18.6434	17.2889	19.1133	19.1713
PI (32:0)	20.9445	20.9445	19.1712	19.1712	-1.77327	0.292546	1.22554e-06	4.51406e-06	20.274	20.6231	20.4933	21.099	21.2688	20.6452	20.691	21.2758	20.9059	21.7263	21.3873	20.5351	16.9676	18.1214	19.1082	17.8318	19.7783	19.7407	19.2694	19.8858	20.2421	19.4031
Lyso-PC (18:0)	21.0542	21.0542	19.3844	19.3844	-1.66983	0.314291	0.000477345	0.0012865	19.8893	19.8837	20.9864	21.4729	20.9836	21.3549	21.7133	21.6178	21.2176	21.4113	21.0654	19.4747	16.9088	19.3983	18.9704	20.6501	19.888	20.2224	19.0346	18.6783	20.0289	19.9738
Carnitine (16:1)	24.8654	24.8654	23.2296	23.2296	-1.63584	0.321784	4.52e-10	2.77478e-09	25.1657	25.4148	25.4682	25.2947	25.1317	25.0797	24.2878	24.6369	24.3555	24.4261	24.2582	23.8728	23.8005	23.6509	23.8186	22.9878	22.693	22.6255	23.1395	23.208	22.6436	23.0849
Glutamine	23.076	23.076	21.4818	21.4818	-1.59416	0.331214	6.51611e-06	2.21548e-05	22.2967	22.4887	22.2182	21.5613	22.8172	23.2799	25.487	23.5151	23.3278	23.3321	23.5118	20.9019	21.1178	21.2468	21.2636	21.3213	21.3939	22.3239	21.5226	21.4765	22.0564	21.6752
Carnitine (4:0)	22.5636	22.5636	21.1061	21.1061	-1.45748	0.36413	5.24601e-08	2.36606e-07	22.6165	22.6257	22.6908	21.9515	22.728	22.6868	21.1407	22.836	22.9602	22.9734	22.9897	19.2877	20.6532	21.9741	21.3739	21.8076	21.1512	21.1759	21.4988	21.1098	20.6171	21.5178
Acetylcholine	23.3088	23.3088	21.8868	21.8868	-1.42201	0.373193	5.34121e-18	1.0731e-16	23.3363	23.159	22.9921	23.1745	23.4984	23.4226	23.2395	23.5377	23.3603	23.2544	23.4223	21.6696	21.8542	21.7773	21.3675	22.1188	22.6544	22.0182	21.9881	21.9864	21.3246	21.9961
Aminolevulinic Acid	18.7126	18.7126	17.3261	17.3261	-1.38652	0.382485	0.000625802	0.00164646	22.4218	22.4178	21.8272	21.8113	16.7658	16.7658	16.7658	16.7658	16.7658	16.7658	16.7658	19.5541	20.1407	16.7658	16.7658	16.7658	16.7658	16.7658	16.7658	16.7658	16.7658	16.7658
3-Dehydroxycarnitine	23.2471	23.2471	21.8753	21.8753	-1.37185	0.386396	5.33298e-16	9.06606e-15	23.3363	23.159	22.9921	23.1745	23.4984	23.4226	23.2405	23.0619	23.159	23.2518	23.4223	21.6696	21.8542	21.7773	21.3675	22.1188	22.6544	22.0182	21.9191	21.9285	21.3246	21.9961
Cytidine 5'-diphosphocholine	16.0915	16.0915	17.439	17.439	1.34754	2.54477	0.000223419	0.000664779	16.0823	15.5688	15.3331	16.789	16.4857	17.0575	17.2897	15.0981	15.3294	16.4214	15.5511	19.0711	18.4719	18.4906	17.1324	16.6888	17.0532	16.1364	18.0211	18.3152	15.8764	16.5718
S-Adenosylmethionine	18.2448	18.2448	19.6677	19.6677	1.4229	2.68125	5.12572e-08	2.35997e-07	18.9382	18.7529	18.5253	17.211	18.6865	19.1937	16.9445	17.1518	17.4234	18.9631	18.9025	19.7921	19.2873	19.0837	18.9706	20.4107	19.7742	19.5706	19.3761	19.4243	20.2821	20.3729
Dipthamide	17.9677	17.9677	19.4547	19.4547	1.48707	2.80319	0.000284762	0.000828057	18.1014	16.6203	19.0617	19.5254	18.5163	18.171	19.4412	16.0562	17.2558	17.9892	16.9059	19.4351	19.9972	20.3363	19.6963	20.4682	19.9691	19.7552	18.9048	17.9232	19.313	18.2036
PC (40:5)	23.4417	23.4417	25.0786	25.0786	1.63692	3.11001	3.79117e-18	8.37849e-17	23.5919	23.4352	23.8649	23.8364	23.2001	23.3185	23.7566	23.5152	23.5328	22.8593	22.9477	25.3754	25.0536	25.4933	25.5594	25.1234	25.1867	24.9104	24.9195	24.8582	24.793	24.5916
Lyso-PC (18:1)	20.7498	20.7498	22.5665	22.5665	1.81669	3.52273	4.10359e-10	2.60201e-09	20.777	20.418	21.0737	20.6111	20.8088	21.0153	21.2856	21.2354	19.7297	20.533	20.7603	23.0603	22.2115	22.2876	22.3562	22.6019	22.7754	22.2704	22.8272	22.7096	22.2586	22.8728
Deoxy-heptulose-7-phosphate	11.5425	11.5425	13.3866	13.3866	1.84412	3.59034	0.00187271	0.00441753	11.3254	11.3254	11.3254	11.3254	11.3254	11.3254	11.3254	11.3254	11.3254	11.3254	13.7134	14.8733	11.3254	11.3254	11.3254	15.1195	11.3254	14.0011	13.9602	11.3254	15.9013	16.7704
S-Methyl-thioadenosine	17.6796	17.6796	19.5248	19.5248	1.84523	3.59311	4.09877e-05	0.00012581	15.4261	18.3984	18.245	16.6181	19.4244	19.4212	17.0508	17.9913	16.5991	17.4176	17.8836	19.243	19.2506	19.5025	18.514	20.8203	20.808	20.9325	18.3536	18.61	19.6229	19.1157
Valyllysine	19.0693	19.0693	20.9599	20.9599	1.89056	3.70779	4.57964e-14	4.81953e-13	18.9217	17.3557	18.9257	19.0954	19.085	19.015	19.8808	19.2743	19.2627	19.5015	19.4446	21.1786	20.8363	20.9469	20.6101	21.4381	20.8211	20.8136	21.0066	20.7034	20.886	21.3181
UTP	15.5104	15.5104	17.4383	17.4383	1.92796	3.80516	0.00144643	0.00347458	14.4518	13.7164	14.1362	15.6464	17.1112	18.3447	16.0065	15.0322	15.6241	15.5561	14.9886	19.6621	14.1727	14.8659	12.6246	19.2384	17.9952	18.2695	18.4024	18.1632	19.1128	19.3148
Cholinephosphate	23.7712	23.7712	25.8619	25.8619	2.09079	4.25981	8.99473e-21	2.83976e-19	23.8908	23.657	23.6345	23.4496	23.8439	23.8045	23.5929	24.3364	23.9979	23.6484	23.6269	25.9969	25.6529	25.4377	25.3551	26.2396	26.0368	25.982	26.1718	25.8553	25.5224	26.2309
Choline	28.5416	28.5416	30.7008	30.7008	2.15922	4.46672	1.36382e-13	1.37002e-12	28.822	28.8226	29.0068	28.7632	28.666	28.7315	28.4941	28.1858	27.6623	28.3452	28.4577	30.7562	30.7123	30.5847	30.4659	31.0082	31.0705	30.8391	30.622	30.5389	30.3337	30.7773
P-DMEA	19.763	19.763	21.9639	21.9639	2.20089	4.59764	3.45469e-20	9.54359e-19	19.7859	19.8121	19.7483	19.3285	19.9829	20.0429	19.2566	20.2693	20.1911	19.4726	19.5026	22.1869	21.7046	21.5701	21.4778	22.3853	22.0802	22.031	22.3283	22.051	21.779	22.0082
Adenosine diphosphate ribose	13.068	13.068	15.3716	15.3716	2.30358	4.93682	7.5129e-05	0.000227445	12.1379	12.1379	13.6561	12.1379	12.1379	12.1379	12.1379	15.5584	15.1146	14.4545	12.1379	16.3729	12.1379	12.1379	12.1379	15.0346	15.4582	14.4651	18.0322	17.5484	17.5699	18.1931
L-Tyrosine	16.4451	16.4451	18.8326	18.8326	2.38753	5.23261	0.00114363	0.00283979	16.0817	17.8175	16.0525	15.1576	17.5149	17.4552	15.7467	15.8202	17.8083	14.3953	17.0461	19.6739	19.4145	19.231	17.3349	18.9509	18.3102	19.4321	18.2046	19.2007	19.0181	18.3879
SM (d18:1/18:0)	24.0915	24.0915	26.6113	26.6113	2.51972	5.73472	4.83876e-24	3.56456e-22	23.8598	24.0195	23.8887	24.0088	24.0822	24.1853	24.8755	24.5121	23.9497	23.8868	23.7385	26.7151	26.5247	26.7036	26.8392	26.5628	26.6841	26.6717	26.7216	26.668	26.4412	26.1918
Glycerol1_2-cyclicphosphate	12.7758	12.7758	15.3206	15.3206	2.5448	5.83529	1.58156e-05	5.06557e-05	14.4702	12.3558	12.3558	12.3558	12.3558	12.3558	14.8618	12.3558	12.3558	12.3558	12.3558	14.8249	15.2569	15.1758	14.8652	17.2928	16.4648	12.3558	16.6802	16.07	14.7239	14.8165
Cysteinylglycine(Cys-Gly)	14.2533	14.2533	17.1455	17.1455	2.89218	7.42392	1.9994e-06	7.01378e-06	13.9423	13.8574	14.0148	12.1242	15.1834	14.9405	15.0561	16.7664	15.1051	13.6721	12.1242	18.1774	16.2698	17.2614	16.4173	17.3779	17.4367	17.1599	16.1089	17.5562	17.9664	16.8684
Lyso-PC (22:4)	16.8921	16.8921	20.165	20.165	3.27291	9.66594	1.89031e-08	9.08172e-08	17.6496	15.6487	15.6487	18.1908	15.6487	15.6487	17.7287	15.6487	17.378	18.5237	18.0992	21.5517	19.1269	20.0132	19.1381	20.7929	19.1811	18.3979	21.1368	21.0764	20.4412	20.9593
PC (44:8)	15.9769	15.9769	19.8249	19.8249	3.84806	14.4006	3.88171e-12	3.29945e-11	15.9769	15.9769	15.9769	15.9769	15.9769	15.9769	15.9769	15.9769	15.9769	15.9769	15.9769	21.4116	20.2338	20.0349	18.5987	18.0454	19.0099	19.0468	20.3079	20.4789	20.5191	20.3872
Hexoses	17.351	17.351	21.3158	21.3158	3.9648	15.6143	9.25526e-15	1.11844e-13	18.3352	18.5865	18.0959	17.9932	16.8176	17.3453	17.1536	15.8176	15.8176	15.8176	19.0811	21.5638	21.7799	21.2576	21.4898	20.9841	21.1569	20.6814	21.5127	20.9709	21.2431	21.8338
PE (38:1)	18.2923	18.2923	22.5737	22.5737	4.28144	19.4465	9.0121e-20	2.21297e-18	19.7779	19.2898	16.8178	19.4425	18.9946	16.8178	18.4478	18.9202	18.0715	17.8178	16.8178	23.2596	22.7396	23.4833	23.1881	22.5924	22.5398	22.5599	21.3194	21.9855	22.6428	22.0009
sn-glycero-3-Phosphoethanolamine	16.3383	16.3383	20.7868	20.7868	4.4485	21.8339	2.38688e-22	1.055e-20	15.8553	16.8713	16.9075	15.4256	15.9905	16.893	15.9549	17.1046	15.2846	16.5646	16.8689	20.8775	20.6105	20.5175	20.2798	21.3389	20.902	20.7596	21.0014	20.8606	20.7717	20.7347
Glycerophosphorylethanolamine	16.3383	16.3383	20.7915	20.7915	4.45324	21.9057	2.3526e-22	1.055e-20	15.8553	16.8713	16.9075	15.4256	15.9905	16.893	15.9549	17.1046	15.2846	16.5646	16.8689	20.8775	20.6105	20.5175	20.2798	21.3389	20.902	20.7918	21.0212	20.8606	20.7717	20.7347
L-alpha-Glycerylphosphorylcholine	20.5003	20.5003	25.3667	25.3667	4.86646	29.1709	6.69573e-26	1.47976e-23	20.4409	20.0974	20.2048	20.1125	20.1859	20.3911	20.9348	20.9242	20.4542	20.9823	20.775	24.8593	25.1173	25.3153	24.6605	25.1927	24.9047	24.8147	25.9247	25.729	26.2692	26.2468
sn-glycero-3-Phosphocholine	20.2135	20.2135	25.3674	25.3674	5.15389	35.602	4.07419e-25	4.50198e-23	20.4041	20.0803	20.2048	20.0934	20.1863	20.4561	18.3	20.9047	20.0861	20.8576	20.775	24.8428	25.1166	25.3108	24.6531	25.2255	24.9483	24.8543	25.894	25.6809	26.2688	26.2462
SM (d18:1/18:1)	16.4326	16.4326	21.9377	21.9377	5.50509	45.4149	6.56496e-21	2.41809e-19	16.3417	16.3417	16.3417	16.3417	16.3417	16.3417	16.3417	16.3417	16.3417	17.3417	16.3417	22.181	21.9771	21.9592	21.771	21.9033	22.1707	22.1664	21.8758	21.7478	21.9943	21.5683
