# Supplementary material for: Metabolomic profiling of rare cell populations isolated by flow cytometry from tissues
Source: eLife. 2021 Jan 20;10:e61980. doi: 10.7554/eLife.61980 (PMC7847306; doi:10.7554/eLife.61980)
Supplement: Figure 2—source data 2. — Metabolites enriched or depleted in sorted hematopoietic stem cell (HSC)/multipotent progenitors (MPPs) as compared to whole bone marrow (WBM) cells (fold change >2 and false discovery rate [FDR] < 0.05). [file elife-61980-fig2-data2.xlsx]

## Sheet: Sheet1
	Figure 2 - source data 2
	Figure 2 – supplementary table 1. Metabolites enriched or depleted in sorted HSC/MPPs as compared to WBM cells (fold change > 2 and FDR < 0.05)
	Metabolite	FC (HSC-MPP / WBM)	FDR
	Urate	0.018	0
	N-Ribosylnicotinamide	0.036	0
	N-Acetylhexosamine sulfate	0.067	0
	Cytidine cyclic phosphate	0.077	0
	Argininosuccinate	0.081	0
	Inosine monophosphate	0.104	0
	Stachydrine	0.11	0
	2-Mannosyl-3-phosphoglycerate	0.118	0
	AICAR	0.123	0
	PS (38:6)	0.144	0
	3-Hydroxycarnitine (18:1)	0.173	0
	PS (34:2)	0.18	0
	4alpha-Hydroxyformyl-4beta-methyl-5alpha-cholest-8-en-3beta-ol	0.185	0.0007
	Ala-Tyr	0.186	0.0117
	Carnitine	0.207	0
	Isoleucine/ Leucine	0.239	0.0023
	PC (36:4)	0.247	0
	Carnitine (3:0)	0.26	0
	N,N,N-Trimethyllysine	0.266	0
	PI (32:0)	0.293	0
	Lyso-PC (18:0)	0.314	0.0013
	Carnitine (16:1)	0.322	0
	Ala-Leu	0.329	0.0326
	Glutamine	0.331	0
	Carnitine (4:0)	0.364	0
	PC (38:5)	0.368	0.0238
	Methionine	0.371	0.0461
	Acetylcholine	0.373	0
	5-Aminolevulinate	0.382	0.0016
	Deoxycarnitine	0.386	0
	Taurocyamine	0.404	0.0461
	Carnitine (18:1)	0.416	0
	SM (d18:1/14:0)	0.422	0.0482
	Guanidinoacetate	0.429	0
	Carnitine (14:0)	0.439	0
	3-Hydroxycarnitine (16:0)	0.444	0.0012
	3-Hydroxycarnitine (14:0)	0.447	0.0054
	Hypoxanthine	0.458	0.0477
	SM (d18:1/16:1)	0.466	0
	Carnitine (16:0)	0.479	0
	Carnitine (12:0)	0.484	0.0015
	SM (d18:1/22:0)	2.038	0
	Carnitine (5:0)	2.068	0.0422
	PC (40:8)	2.143	0
	PC (34:1)	2.192	0
	Saccharate	2.228	0.0001
	Hydroxypyruvate	2.307	0.001
	PC (36:1)	2.327	0
	PC (40:4)	2.371	0
	Phosphoethanolamine	2.41	0
	Lyso-PC (17:0)	2.424	0.0262
	Lyso-PC (18:2)	2.504	0.0252
	Citicoline	2.545	0.0007
	S-Adenosylmethionine	2.681	0
	Uridine monophosphate	2.753	0.0202
	Diphthamide	2.803	0.0008
	PC (40:5)	3.11	0
	Lyso-PC (18:1)	3.523	0
	S-Methylthioadenosine	3.593	0.0001
	Val-Lys	3.708	0
	Uridine triphosphate	3.805	0.0035
	Indole-3-acrylate	4.218	0.0215
	Phosphorylcholine	4.26	0
	Choline	4.467	0
	P-DMEA	4.598	0
	Adenosine diphosphate ribose	4.937	0.0002
	Tyrosine	5.233	0.0028
	SM (d18:1/18:0)	5.735	0
	Glycerol cyclic phosphate	5.835	0.0001
	Cys-Gly	7.424	0
	Lyso-PC (22:4)	9.666	0
	PC (44:8)	14.401	0
	Myoinositol	15.614	0
	PE (38:1)	19.447	0
	Glycerophosphoethanolamine	21.906	0
	Glycerophosphocholine	29.171	0
	SM (d18:1/18:1)	45.415	0
