# Supplementary material for: Metabolomic profiling of rare cell populations isolated by flow cytometry from tissues
Source: eLife. 2021 Jan 20;10:e61980. doi: 10.7554/eLife.61980 (PMC7847306; doi:10.7554/eLife.61980)
Supplement: Figure 3—source data 1. [file elife-61980-fig3-data1.xlsx]

## Sheet: 3A
Bone marrow cellularity of control treated mice or methotrexate (MTX) treated mice. Cellularity is calculated per 2 legs.
	Control	Control	Control	Control	Control
	Mouse 1	Mouse 2	Mouse 3	Mouse 4	Mouse 5
	99.3	89.34	104.94	85.5	110.7
Experiment #	1	1	2	2	2
	MTX	MTX	MTX	MTX	MTX
	Mouse 6	Mouse 7	Mouse 8	Mouse 9	Mouse 10
	62.22	135.18	95.52	69.12	86.58
Experiment #	1	1	2	2	2
Table Analyzed	1Factor_unpaired_Value_CtrlMTX_Cellularity_0623-0624_2020_V1
Column B	MTX
vs.	vs.
Column A	Control
Unpaired t test
P value	0.5635
P value summary	ns
Significantly different (P < 0.05)?	No
One- or two-tailed P value?	Two-tailed
t, df	t=0.6025, df=8
How big is the difference?
Mean of column A	97.96
Mean of column B	89.72
Difference between means (B - A) ± SEM	-8.232 ± 13.66
95% confidence interval	-39.74 to 23.27
R squared (eta squared)	0.04341
F test to compare variances
F, DFn, Dfd	7.439, 4, 4
P value	0.0776
P value summary	ns
Significantly different (P < 0.05)?	No
Model comparison	SS	DF	Probability it is correct
Null H. Population means identical	3903	9	87.22%
Alternative H: Distinct population means	3733	8	12.78%
Ratio of probabilities			6.827
Difference in AICc			-3.842
Normality of Residuals
Test name	Statistics	P value	Passed normality test (alpha=0.05)?	P value summary
Anderson-Darling (A2*)	0.312	0.492	Yes	ns
D'Agostino-Pearson omnibus (K2)	4.587	0.1009	Yes	ns
Shapiro-Wilk (W)	0.9307	0.4552	Yes	ns
Kolmogorov-Smirnov (distance)	0.1658	0.1	Yes	ns
Data analyzed
Sample size, column A	5
Sample size, column B	5

## Sheet: 3B
HSC frequency in bone marrow of control treated or methotrexate (MTX) treated mice.
	Ctrl	Ctrl	Ctrl	Ctrl
	Mouse 1	Mouse 2	Mouse 3	Mouse 4				Statistical test was done using HSC, MPP, and LSK data together.
	0.013	0.013	0.022	0.017
Experiment #	1	1	2	2
	MTX	MTX	MTX	MTX
	Mouse 5	Mouse 6	Mouse 7	Mouse 8
	0.021	0.019	0.037	0.037
Experiment #	1	1	2	2
Table Analyzed	log2+0_CtrlMTX_CellsFreq_0623-0624_2020_V1							Compare each cell mean with the other cell mean in that row
Two-way RM ANOVA	Matching: Stacked							Number of families	1
Assume sphericity?	No							Number of comparisons per family	3
Alpha	0.05							Alpha	0.05
Source of Variation	% of total variation	P value	P value summary	Significant?	Geisser-Greenhouse's epsilon			Sidak's multiple comparisons test	Mean Diff.	95.00% CI of diff.	Significant?	Summary	Adjusted P Value
Row Factor x Column Factor	2.966	0.127	ns	No
Row Factor	86.64	0.0001	***	Yes	0.5199			Ctrl - MTX
Column Factor	0.03682	0.7994	ns	No				HSC	-0.7778	-1.855 to 0.2997	No	ns	0.1524
Subject	3.132	0.5455	ns	No				LSK	0.04548	-2.589 to 2.680	No	ns	0.9998
								MPP	0.5495	-0.1692 to 1.268	No	ns	0.1226
ANOVA table	SS	DF	MS	F (DFn, DFd)	P value
Row Factor x Column Factor	1.796	2	0.8979	F (2, 12) = 2.463	P=0.1270
Row Factor	52.46	2	26.23	F (1.040, 6.238) = 71.96	P=0.0001			Test details	Mean 1	Mean 2	Mean Diff.	SE of diff.	N1	N2	t	DF
Column Factor	0.0223	1	0.0223	F (1, 6) = 0.07053	P=0.7994
Subject	1.897	6	0.3161	F (6, 12) = 0.8672	P=0.5455			Ctrl - MTX
Residual	4.374	12	0.3645					HSC	-5.979	-5.201	-0.7778	0.3161	4	4	2.461	5.389
								LSK	-2.383	-2.429	0.04548	0.6183	4	4	0.07355	3.534
Difference between column means								MPP	-5.218	-5.767	0.5495	0.2009	4	4	2.735	4.819
Mean of Ctrl	-4.527
Mean of MTX	-4.466
Difference between means	-0.06096
SE of difference	0.2295
95% CI of difference	-0.6226 to 0.5007
Data summary
Number of columns (Column Factor)	2
Number of rows (Row Factor)	3
Number of subjects (Subject)	8
Number of missing values	0

## Sheet: 3C
MPP frequency in bone marrow of control treated or methotrexate (MTX) treated mice.								Statistical test was done using HSC, MPP, and LSK data together.
	Ctrl	Ctrl	Ctrl	Ctrl
	Mouse 1	Mouse 2	Mouse 3	Mouse 4
	0.022	0.038	0.026	0.024
Experiment #	1	1	2	2
	MTX	MTX	MTX	MTX
	Mouse 5	Mouse 6	Mouse 7	Mouse 8
	0.016	0.017	0.019	0.022
Experiment #	1	1	2	2
Table Analyzed	log2+0_CtrlMTX_CellsFreq_0623-0624_2020_V1							Compare each cell mean with the other cell mean in that row
Two-way RM ANOVA	Matching: Stacked							Number of families	1
Assume sphericity?	No							Number of comparisons per family	3
Alpha	0.05							Alpha	0.05
Source of Variation	% of total variation	P value	P value summary	Significant?	Geisser-Greenhouse's epsilon			Sidak's multiple comparisons test	Mean Diff.	95.00% CI of diff.	Significant?	Summary	Adjusted P Value
Row Factor x Column Factor	2.966	0.127	ns	No
Row Factor	86.64	0.0001	***	Yes	0.5199			Ctrl - MTX
Column Factor	0.03682	0.7994	ns	No				HSC	-0.7778	-1.855 to 0.2997	No	ns	0.1524
Subject	3.132	0.5455	ns	No				LSK	0.04548	-2.589 to 2.680	No	ns	0.9998
								MPP	0.5495	-0.1692 to 1.268	No	ns	0.1226
ANOVA table	SS	DF	MS	F (DFn, DFd)	P value
Row Factor x Column Factor	1.796	2	0.8979	F (2, 12) = 2.463	P=0.1270
Row Factor	52.46	2	26.23	F (1.040, 6.238) = 71.96	P=0.0001			Test details	Mean 1	Mean 2	Mean Diff.	SE of diff.	N1	N2	t	DF
Column Factor	0.0223	1	0.0223	F (1, 6) = 0.07053	P=0.7994
Subject	1.897	6	0.3161	F (6, 12) = 0.8672	P=0.5455			Ctrl - MTX
Residual	4.374	12	0.3645					HSC	-5.979	-5.201	-0.7778	0.3161	4	4	2.461	5.389
								LSK	-2.383	-2.429	0.04548	0.6183	4	4	0.07355	3.534
Difference between column means								MPP	-5.218	-5.767	0.5495	0.2009	4	4	2.735	4.819
Mean of Ctrl	-4.527
Mean of MTX	-4.466
Difference between means	-0.06096
SE of difference	0.2295
95% CI of difference	-0.6226 to 0.5007
Data summary
Number of columns (Column Factor)	2
Number of rows (Row Factor)	3
Number of subjects (Subject)	8
Number of missing values	0

## Sheet: 3D
LSK frequency in bone marrow of control treated or methotrexate (MTX) treated mice.								Statistical test was done using HSC, MPP, and LSK data together.
	Ctrl	Ctrl	Ctrl	Ctrl
	Mouse 1	Mouse 2	Mouse 3	Mouse 4
	0.2	0.59	0.13	0.088
Experiment #	1	1	2	2
	MTX	MTX	MTX	MTX
	Mouse 5	Mouse 6	Mouse 7	Mouse 8
	0.25	0.2	0.14	0.17
Experiment #	1	1	2	2
Table Analyzed	log2+0_CtrlMTX_CellsFreq_0623-0624_2020_V1							Compare each cell mean with the other cell mean in that row
Two-way RM ANOVA	Matching: Stacked							Number of families	1
Assume sphericity?	No							Number of comparisons per family	3
Alpha	0.05							Alpha	0.05
Source of Variation	% of total variation	P value	P value summary	Significant?	Geisser-Greenhouse's epsilon			Sidak's multiple comparisons test	Mean Diff.	95.00% CI of diff.	Significant?	Summary	Adjusted P Value
Row Factor x Column Factor	2.966	0.127	ns	No
Row Factor	86.64	0.0001	***	Yes	0.5199			Ctrl - MTX
Column Factor	0.03682	0.7994	ns	No				HSC	-0.7778	-1.855 to 0.2997	No	ns	0.1524
Subject	3.132	0.5455	ns	No				LSK	0.04548	-2.589 to 2.680	No	ns	0.9998
								MPP	0.5495	-0.1692 to 1.268	No	ns	0.1226
ANOVA table	SS	DF	MS	F (DFn, DFd)	P value
Row Factor x Column Factor	1.796	2	0.8979	F (2, 12) = 2.463	P=0.1270
Row Factor	52.46	2	26.23	F (1.040, 6.238) = 71.96	P=0.0001			Test details	Mean 1	Mean 2	Mean Diff.	SE of diff.	N1	N2	t	DF
Column Factor	0.0223	1	0.0223	F (1, 6) = 0.07053	P=0.7994
Subject	1.897	6	0.3161	F (6, 12) = 0.8672	P=0.5455			Ctrl - MTX
Residual	4.374	12	0.3645					HSC	-5.979	-5.201	-0.7778	0.3161	4	4	2.461	5.389
								LSK	-2.383	-2.429	0.04548	0.6183	4	4	0.07355	3.534
Difference between column means								MPP	-5.218	-5.767	0.5495	0.2009	4	4	2.735	4.819
Mean of Ctrl	-4.527
Mean of MTX	-4.466
Difference between means	-0.06096
SE of difference	0.2295
95% CI of difference	-0.6226 to 0.5007
Data summary
Number of columns (Column Factor)	2
Number of rows (Row Factor)	3
Number of subjects (Subject)	8
Number of missing values	0

## Sheet: 3E
Peripheral blood chimerism of recipient mice competitively transplanted with either control-treated whole bone marrow or methotrexate (MTX)-treated whole bone marrow cells.
		Control	Control	Control	Control	Control	Control	Control	Control	Control	Control	Control	Control	Control	Control	Control
		Mouse 1	Mouse 2	Mouse 3	Mouse 4	Mouse 5	Mouse 6	Mouse 7	Mouse 8	Mouse 9	Mouse 10	Mouse 11	Mouse 12	Mouse 13	Mouse 14	Mouse 15
	4	60.6	53.7	50.3	60.9	56.5	55.5	33.5	66.2	38.5	46.5	66.8	74.3	67.2	31.8	72.3
Experiment #		1	1	1	1	1	1	1	1	1	1	2	2	2	2	2
		MTX	MTX	MTX	MTX	MTX	MTX	MTX	MTX	MTX	MTX
		Mouse 16	Mouse 17	Mouse 18	Mouse 19	Mouse 20	Mouse 21	Mouse 22	Mouse 23	Mouse 24	Mouse 25
	4	62.9	45.7	57.3	53.7	59.8	58.4	60.9	49.9	57	60.3
Experiment #		1	1	1	1	1	2	2	2	2	2
		Control	Control	Control	Control	Control	Control	Control	Control	Control	Control	Control	Control	Control	Control	Control
		Mouse 1	Mouse 2	Mouse 3	Mouse 4	Mouse 5	Mouse 6	Mouse 7	Mouse 8	Mouse 9	Mouse 10	Mouse 11	Mouse 12	Mouse 13	Mouse 14	Mouse 15
	8	58.58	54.79	65.95	69.33	67.67	60.56	39.78	76.43	50.33	61.22	50.98	56.25	41.23	58.71	74.92
Experiment #		1	1	1	1	1	1	1	1	1	1	2	2	2	2	2
		MTX	MTX	MTX	MTX	MTX	MTX	MTX	MTX	MTX	MTX
		Mouse 16	Mouse 17	Mouse 18	Mouse 19	Mouse 20	Mouse 21	Mouse 22	Mouse 23	Mouse 24	Mouse 25
	8	79.69	28.06	47.54	72.85	67.19	64.67	39.82	38.91	16.67	45.6
Experiment #		1	1	1	1	1	2	2	2	2	2
		Control	Control	Control	Control	Control
		Mouse 1	Mouse 2	Mouse 3	Mouse 4	Mouse 5
	12	62.42	80.33	69.41	41.87	69.72
Experiment #		1	1	1	1	1
		MTX	MTX	MTX	MTX	MTX	MTX	MTX	MTX	MTX	MTX
		Mouse 16	Mouse 17	Mouse 18	Mouse 19	Mouse 20	Mouse 21	Mouse 22	Mouse 23	Mouse 24	Mouse 25
	12	80.51	33.05	55.77	83.16	68.8	61.38	78.5	45.61	38.55	45.23
Experiment #		1	1	1	1	1	2	2	2	2	2
		Control	Control	Control	Control	Control	Control	Control	Control	Control	Control	Control	Control	Control	Control	Control
		Mouse 1	Mouse 2	Mouse 3	Mouse 4	Mouse 5	Mouse 6	Mouse 7	Mouse 8	Mouse 9	Mouse 10	Mouse 11	Mouse 12	Mouse 13	Mouse 14	Mouse 15
	16	62.8	85.8	75.5	32.1	72.9	78.2	64.6	62.8	86	73.2	82.8	57.1	76.1	3.6	18.5
Experiment #		1	1	1	1	1	1	1	1	1	1	2	2	2	2	2
		MTX	MTX	MTX	MTX	MTX	MTX	MTX	MTX	MTX	MTX
		Mouse 16	Mouse 17	Mouse 18	Mouse 19	Mouse 20	Mouse 21	Mouse 22	Mouse 23	Mouse 24	Mouse 25
	16	67.4	54.3	63.5	91.4	66.1	82.8	57.1	76.1	3.6	18.5
Experiment #		1	1	1	1	1	2	2	2	2	2
Table Analyzed	2Factor_partially paired_Percent_TransplantMTX_0623-0624_2020_V1							Compare each cell mean with the other cell mean in that row
Mixed-effects model (REML)	Matching: Stacked							Number of families	1
Assume sphericity?	No							Number of comparisons per family	4
Alpha	0.05							Alpha	0.05
Fixed effects (type III)	P value	P value summary	Statistically significant (P < 0.05)?	F (DFn, DFd)	Geisser-Greenhouse's epsilon			Sidak's multiple comparisons test	Mean Diff.	95.00% CI of diff.	Significant?	Summary	Adjusted P Value
Row Factor	0.3641	ns	No	F (1.653, 32.52) = 1.003	0.5511
Column Factor	0.3534	ns	No	F (1, 23) = 0.8972				Control - MTX
Row Factor x Column Factor	0.7246	ns	No	F (3, 59) = 0.4409				4	-0.95	-11.51 to 9.606	No	ns	0.9986
								8	9.015	-11.46 to 29.49	No	ns	0.6372
Random effects	SD	Variance						12	5.694	-20.29 to 31.68	No	ns	0.9484
Subject	9.118	83.15						16	4.053	-25.80 to 33.91	No	ns	0.9931
Residual	15.75	248.2
Was the matching effective?								Test details	Mean 1	Mean 2	Mean Diff.	SE of diff.	N1	N2	t	DF
Chi-square, df	6.570, 1
P value	0.0104							Control - MTX
P value summary	*							4	55.64	56.59	-0.95	3.854	15	10	0.2465	19.74
Is there significant matching (P < 0.05)?	Yes							8	59.12	50.1	9.015	7.042	15	10	1.28	12.41
								12	64.75	59.06	5.694	8.616	5	10	0.6609	10.17
Difference between column means								16	62.13	58.08	4.053	10.8	15	10	0.3752	18.1
Predicted mean of Control	60.84
Predicted mean of MTX	55.96
Difference between predicted means	4.886
SE of difference	5.159
95% CI of difference	-5.785 to 15.56
Data summary
Number of columns (Column Factor)	2
Number of rows (Row Factor)	4
Number of subjects (Subject)	25
Number of missing values	10

## Sheet: 3F
AICAR levels in HSC/MPPs of control-treated or methotrexate (MTX)-treated mice.
	Control	Control	Control	Control	Control	Control	Control	Control	Control	Control	Control
	Mouse 1	Mouse 2	Mouse 3	Mouse 4	Mouse 5	Mouse 6	Mouse 7	Mouse 8	Mouse 9	Mouse 10	Mouse 11
	5529.14	1125.77	389.524	1575.51	389.524	389.524	389.524	2089.13	1614.51	389.524	1813.52
Experiment #	1	1	1	1	2	2	2	3	3	4	4
	MTX	MTX	MTX	MTX	MTX	MTX	MTX	MTX	MTX
	Mouse 12	Mouse 13	Mouse 14	Mouse 15	Mouse 16	Mouse 17	Mouse 18	Mouse 19	Mouse 20
	168025	139304	59928.1	180528	334411	25818.9	49837.9	29974.2	56617.8
Experiment #	1	1	1	2	2	3	3	4	4
Feature	Control_HSC-MPP_log2_Mean	Control_HSC-MPP_log2_Adjusted_Mean	MTX_HSC-MPP_log2_Mean	MTX_HSC-MPP_log2_Adjusted_Mean	Log2 Fold Change (MTX / Control)	Fold change (MTX / Control)	P	FDR	Control_HSC-MPP_1	Control_HSC-MPP_2	Control_HSC-MPP_3	Control_HSC-MPP_4	Control_HSC-MPP_5	Control_HSC-MPP_6	Control_HSC-MPP_7	Control_HSC-MPP_9	Control_HSC-MPP_10	Control_HSC-MPP_12	Control_HSC-MPP_13	MTX_HSC-MPP_1	MTX_HSC-MPP_2	MTX_HSC-MPP_4	MTX_HSC-MPP_5	MTX_HSC-MPP_6	MTX_HSC-MPP_9	MTX_HSC-MPP_10	MTX_HSC-MPP_12	MTX_HSC-MPP_13
AICAR	9.88446	9.88446	16.3391	16.3391	6.45462	87.707	3.89657e-19	8.49453e-17	12.4328	10.1367	8.60557	10.6216	8.60557	8.60557	8.60557	11.0287	10.6569	8.60557	10.8246	17.3583	17.0879	15.8709	17.4619	18.3513	14.6561	15.605	14.8714	15.789

## Sheet: 3G
Metabolites observed above background in 10,000 sorted subcutaneous tumor melanoma cells or 10,000 sorted circulating melanoma cells.
	Tumor
	Mice 1-4
Experiment 1	145
	CMC
	Mice 1-4
Experiment 1	154

## Sheet: 3H
IMP levels detected in 10,000 subcutaneous tumor cells or 10,000 sorted circulating melanoma cells.
	Tumor	Tumor	Tumor	Tumor
	Mouse 1	Mouse 2	Mouse 3	Mouse 4
Experiment 1	1.38876e+06	1.75513e+06	1.09132e+06	1.2786e+06
	CMC	CMC	CMC	CMC
	Mouse 1	Mouse 2	Mouse 3	Mouse 4
Experiment 1	244336	733915	597758	448803
Feature	Tumor_log2_Mean	Tumor_log2_Adjusted_Mean	CMC_log2_Mean	CMC_log2_Adjusted_Mean	Log2 Fold Change (CMC / Tumor)	Fold Change (CMC / Tumor)	P	FDR	Tumor_1	Tumor_2	Tumor_3	Tumor_4	CMC_1	CMC_2	CMC_3	CMC_4
Xanthosine monophosphate	17.584	17.584	13.7442	13.7442	-3.83978	0.0698413	0.00578892	0.207295	18.6852	18.0046	17.2287	16.4174	14.8099	13.0556	13.0556	14.0556
Adenosine monophosphate	24.0608	24.0608	23.5448	23.5448	-0.51601	0.699303	0.00424869	0.207295	24.2063	24.0041	24.077	23.956	23.8472	23.5467	23.4601	23.3253
Inosine monophosphate	20.3731	20.3731	18.8372	18.8372	-1.5359	0.344864	0.0218433	0.232286	20.4054	20.7431	20.0576	20.2861	17.8985	19.4853	19.1892	18.7757
Guanosine monophosphate	19.9514	19.9514	19.1296	19.1296	-0.821781	0.565743	0.029289	0.232286	20.1896	19.8088	20.0034	19.8037	19.7621	19.2956	18.7151	18.7457

## Sheet: 3I
XMP levels detected in 10,000 sorted subcutaneous tumor cells or 10,000 sorted circulating melanoma cells.
	Tumor	Tumor	Tumor	Tumor
	Mouse1	Mouse2	Mouse3	Mouse4
Experiment 1	421514	262985	153584	87525.6
	CMC	CMC	CMC	CMC
	Mouse1	Mouse2	Mouse3	Mouse4
Experiment 1	28723.3	8515.09	8515.09	17029.2
Feature	Tumor_log2_Mean	Tumor_log2_Adjusted_Mean	CMC_log2_Mean	CMC_log2_Adjusted_Mean	Log2 Fold Change (CMC / Tumor)	Fold Change (CMC / Tumor)	P	FDR	Tumor_1	Tumor_2	Tumor_3	Tumor_4	CMC_1	CMC_2	CMC_3	CMC_4
Xanthosine monophosphate	17.584	17.584	13.7442	13.7442	-3.83978	0.0698413	0.00578892	0.207295	18.6852	18.0046	17.2287	16.4174	14.8099	13.0556	13.0556	14.0556
Adenosine monophosphate	24.0608	24.0608	23.5448	23.5448	-0.51601	0.699303	0.00424869	0.207295	24.2063	24.0041	24.077	23.956	23.8472	23.5467	23.4601	23.3253
Inosine monophosphate	20.3731	20.3731	18.8372	18.8372	-1.5359	0.344864	0.0218433	0.232286	20.4054	20.7431	20.0576	20.2861	17.8985	19.4853	19.1892	18.7757
Guanosine monophosphate	19.9514	19.9514	19.1296	19.1296	-0.821781	0.565743	0.029289	0.232286	20.1896	19.8088	20.0034	19.8037	19.7621	19.2956	18.7151	18.7457

## Sheet: 3J
GMP levels detected in 10,000 sorted subcutaneous tumor cells or 10,000 sorted circulating melanoma cells.
	Tumor	Tumor	Tumor	Tumor
	Mouse1	Mouse2	Mouse3	Mouse4
Experiment 1	1.19585e+06	918454	1.05108e+06	915208
	CMC	CMC	CMC	CMC
	Mouse1	Mouse2	Mouse3	Mouse4
Experiment 1	889179	643496	430329	439575
Feature	Tumor_log2_Mean	Tumor_log2_Adjusted_Mean	CMC_log2_Mean	CMC_log2_Adjusted_Mean	Log2 Fold Change (CMC / Tumor)	Fold Change (CMC / Tumor)	P	FDR	Tumor_1	Tumor_2	Tumor_3	Tumor_4	CMC_1	CMC_2	CMC_3	CMC_4
Xanthosine monophosphate	17.584	17.584	13.7442	13.7442	-3.83978	0.0698413	0.00578892	0.207295	18.6852	18.0046	17.2287	16.4174	14.8099	13.0556	13.0556	14.0556
Adenosine monophosphate	24.0608	24.0608	23.5448	23.5448	-0.51601	0.699303	0.00424869	0.207295	24.2063	24.0041	24.077	23.956	23.8472	23.5467	23.4601	23.3253
Inosine monophosphate	20.3731	20.3731	18.8372	18.8372	-1.5359	0.344864	0.0218433	0.232286	20.4054	20.7431	20.0576	20.2861	17.8985	19.4853	19.1892	18.7757
Guanosine monophosphate	19.9514	19.9514	19.1296	19.1296	-0.821781	0.565743	0.029289	0.232286	20.1896	19.8088	20.0034	19.8037	19.7621	19.2956	18.7151	18.7457

[truncated: 1 more sheets: 3K]
