# Supplementary material for: Metabolomic profiling of rare cell populations isolated by flow cytometry from tissues
Source: eLife. 2021 Jan 20;10:e61980. doi: 10.7554/eLife.61980 (PMC7847306; doi:10.7554/eLife.61980)
Supplement: Figure 3—source data 2. — Metabolites that differed between circulating melanoma cells and melanoma cells from primary subcutaneous tumors in xenografted mice (fold change >2 and p<0.05). [file elife-61980-fig3-data2.xlsx]

## Sheet: Sheet1
	Figure 3 - source data 2
	Figure 3 – supplementary table 1. Metabolites that differed between circulating melanoma cells and melanoma cells from primary subcutaneous tumors in xenografted mice (Fold change > 2 and P < 0.05).
	Metabolite	FC (CMC / Tumor)	P
	Xanthosine monophosphate	0.07	0.0058
	FA (20:2)	0.15	0.02
	5,6 Dimethylbenzimidazole	0.2	0.0115
	S-Adenosylhomocysteine	0.27	0.0082
	2-Mannosyl-3-phosphoglycerate	0.34	0.0214
	Inosine monophosphate	0.34	0.0218
	Aminocaprylate	0.48	0.0111
	Glycerophosphocholine	2.05	0.0031
	Glycerophosphoethanolamine	2.05	0.0055
	Adenosine triphosphate	2.5	0.0207
	Cystathionine	2.82	0.0122
	Ribulose/Ribose/Xylulose 5-phosphate	3.07	0.0402
	Acetylcarnitine	3.14	0.006
	Uridine triphosphate	5.66	0.0367
	Glu-Glu	7.02	0.0249
