# Supplementary material for: Metabolomic profiling of rare cell populations isolated by flow cytometry from tissues
Source: eLife. 2021 Jan 20;10:e61980. doi: 10.7554/eLife.61980 (PMC7847306; doi:10.7554/eLife.61980)
Supplement: Figure 4—source data 1. [file elife-61980-fig4-data1.xlsx]

## Sheet: 4A
Metabolites detected above background from 10,000 sorted HSC/MPPs in a typical experiment.
Metabolite	Category
Asparagine	Amino acid anabolism
Cysteinylglycine(Cys-Gly)	Amino acid anabolism
D-(+)-Proline	Amino acid anabolism
Dipthamide	Amino acid anabolism
DL-Lysine	Amino acid anabolism
Glutamine	Amino acid anabolism
Isoleucine/ Leucine	Amino acid anabolism
L-Aspartic acid	Amino acid anabolism
L-Glutamic acid	Amino acid anabolism
L-Glutathione (reduced)	Amino acid anabolism
L-Glutathione oxidized	Amino acid anabolism
L-Histidine	Amino acid anabolism
L-Phenylalanine	Amino acid anabolism
L-Tyrosine	Amino acid anabolism
Methionine	Amino acid anabolism
ophthalmic acid	Amino acid anabolism
Valyllysine	Amino acid anabolism
5-Aminovaleric acid	Amino acid catabolism
Acetyl-L-aminoadipate	Amino acid catabolism
Ala-Leu	Amino acid catabolism
Guanidine acetic acid	Amino acid catabolism
Hypotaurine	Amino acid catabolism
Indole-3-acrylic acid	Amino acid catabolism
Taurine	Amino acid catabolism
3-Dehydroxycarnitine	Beta oxidation
3-hydroxybutyrylcarnitine	Beta oxidation
3-Hydroxycarnitine (18:1)	Beta oxidation
Acetyl-L-carnitine	Beta oxidation
Carnitine (12:0)	Beta oxidation
Carnitine (14:0)	Beta oxidation
Carnitine (16:0)	Beta oxidation
Carnitine (16:1)	Beta oxidation
Carnitine (18:0)	Beta oxidation
Carnitine (18:1)	Beta oxidation
Carnitine (3-hydroxy-14:0)	Beta oxidation
Carnitine (4:0)	Beta oxidation
Carnitine (methylbutyryl)	Beta oxidation
DL-Carnitine	Beta oxidation
Hydroxybutyrylcarnitine	Beta oxidation
Hydroxyisovaleroyl carnitine	Beta oxidation
Propionylcarnitine	Beta oxidation
2-(alpha-D-Mannosyl)-3-phosphoglycerate	Glycan Metabolism
Acetyl-hexosamine-sulfate	Glycan Metabolism
Hexoseamine	Glycan Metabolism
UDP-Hexose	Glycan Metabolism
UDP-N-acetyl-D-hexosamine (mix of glucose and galactose)	Glycan Metabolism
D-(+)-Glucose	Glycolysis
Glucose-6-Phosphate	Glycolysis
Glycerol 3-phosphate	Glycolysis
Hexoses	Glycolysis
Phosphoglyceric acid	Glycolysis
Aminolevulinic Acid	Heme Biosynthesis
hydroxycitric acid	keto acids
Eicosadienoic acid	Lipid Metabolism
FA (16:1)	Lipid Metabolism
Glycerol1_2-cyclicphosphate	Lipid Metabolism
Glycerophosphorylethanolamine	Lipid Metabolism
LPC (17:0)	Lipid Metabolism
Lyso-PC (16:0)	Lipid Metabolism
Lyso-PC (18:0)	Lipid Metabolism
Lyso-PC (18:1)	Lipid Metabolism
Lyso-PC (18:2)	Lipid Metabolism
Lyso-PC (22:4)	Lipid Metabolism
Lyso-PE (16:0)	Lipid Metabolism
Lyso-PE (18:0)	Lipid Metabolism
Lyso-PE (18:1)	Lipid Metabolism
Lyso-PE (20:4)	Lipid Metabolism
PC (18:0/18/0)	Lipid Metabolism
O-Phosphorylethanolamine	Lipid Metabolism
PC (32:0)	Lipid Metabolism
PC (32:1)	Lipid Metabolism
PC (32:2)	Lipid Metabolism
PC (34:1)	Lipid Metabolism
PC (34:2)	Lipid Metabolism
PC (36:1)	Lipid Metabolism
PC (36:2)	Lipid Metabolism
PC (36:4)	Lipid Metabolism
PC (36:5)	Lipid Metabolism
PC (38:4)	Lipid Metabolism
PC (38:5)	Lipid Metabolism
PC (40:4)	Lipid Metabolism
PC (40:5)	Lipid Metabolism
PC (40:6)	Lipid Metabolism
PC (40:8)	Lipid Metabolism
PC (44:8)	Lipid Metabolism
PE (32:0)	Lipid Metabolism
PE (34:1)	Lipid Metabolism
PE (34:2)	Lipid Metabolism
PE (36:1)	Lipid Metabolism
PE (36:2)	Lipid Metabolism
PE (36:3)	Lipid Metabolism
PE (36:6)	Lipid Metabolism
PE (38:1)	Lipid Metabolism
PE (38:3)	Lipid Metabolism
PE (38:4)	Lipid Metabolism
PE (38:5)	Lipid Metabolism
PE (38:6)	Lipid Metabolism
PE (40:5)	Lipid Metabolism
PE (40:7)	Lipid Metabolism
PI (32:0)	Lipid Metabolism
Platelet-activating factor	Lipid Metabolism
PS (34:2)	Lipid Metabolism
PS (36:1)	Lipid Metabolism
PS (36:4)	Lipid Metabolism
PS (38:3)	Lipid Metabolism
PS (38:5)	Lipid Metabolism
PS (38:6)	Lipid Metabolism
PS (40:5)	Lipid Metabolism
PS (40:6)	Lipid Metabolism
PS (40:7)	Lipid Metabolism
SM (d18:1/16:1)	Lipid Metabolism
SM (d18:1/18:0)	Lipid Metabolism
SM (d18:1/18:1)	Lipid Metabolism
SM (d18:1/22:0)	Lipid Metabolism
NAD+	NAD-NADP Metabolism
NADH	NAD-NADP Metabolism
NADP+	NAD-NADP Metabolism
NADPH	NAD-NADP Metabolism
N-glycoloyl-beta-D-glucosamine	NAD-NADP Metabolism
Nicotinamide	NAD-NADP Metabolism
N-Ribosylnicotinamide	NAD-NADP Metabolism
2'_3'-CyclicCMP	Nucleotide Metabolism
Adenosine	Nucleotide Metabolism
Adenosine diphosphate ribose	Nucleotide Metabolism
AICAR	Nucleotide Metabolism
CDP-ethanolamine	Nucleotide Metabolism
CyclicADP-ribose	Nucleotide Metabolism
Cytidine 5'-diphosphocholine	Nucleotide Metabolism
Cytidine monophosphate	Nucleotide Metabolism
Guanosine 5'-diphosphate (GDP)	Nucleotide Metabolism
Guanosine monophosphate (GMP)	Nucleotide Metabolism
Hypoxanthine	Nucleotide Metabolism
Inosine-5'-monophosphate (IMP)	Nucleotide Metabolism
Uric acid	Nucleotide Metabolism
Uridine Monophosphate	Nucleotide Metabolism
Uridine5'-diphosphate(UDP)	Nucleotide Metabolism
UTP	Nucleotide Metabolism
Adenosine diphosphate (ADP)	OxPhos
Adenosine monophosphate	OxPhos
Adenosine triphosphate (ATP)	OxPhos
Creatine	OxPhos
Acetylcholine	Single Carbon Metabolism
Choline	Single Carbon Metabolism
Cholinephosphate	Single Carbon Metabolism
Dimethylarginine	Single Carbon Metabolism
Dimethyllysine	Single Carbon Metabolism
L-alpha-Glycerylphosphorylcholine	Single Carbon Metabolism
N6,N6,N6-Trimethyl-L-lysine	Single Carbon Metabolism
P-DMEA	Single Carbon Metabolism
S-Adenosylmethionine	Single Carbon Metabolism
S-Methyl-thioadenosine	Single Carbon Metabolism
a-Ketoglutarate	TCA cycle
D-(+)-Malic acid	TCA cycle
Argininosuccinic acid	Urea cycle
DL-Arginine	Urea cycle
L(+)-Citrulline	Urea cycle
Ornithine	Urea cycle
Trigonelline	Vitamin Metabolism
Trigonelline isomer	Vitamin Metabolism
