# Supplementary material for: Metabolomic profiling of rare cell populations isolated by flow cytometry from tissues
Source: eLife journal article supplement (doi:10.7554/elife.61980), 2021-01-20
Supplement: supp [file elife_poa_e61980_Figure_2_figure_supplement_1.pdf › elife_poa_e61980_Figure_2_figure_supplement_1.pdf]

# Figure 2 - figure supplement 1

| A | Enriched in HSC/MPP v WBM |     |         |                      |         |
|---|---------------------------|-----|---------|----------------------|---------|
|   | Agathocleous et al        |     |         | DeVilbiss et al      |         |
|   | Metabolite                | FC  | FDR     | FC                   | FDR     |
|   | glycerophosphorylcholine  | 34  | <0.0001 | 29                   | <0.0001 |
|   | ascorbate                 | 18  | 0.0001  | n.d. (no EDTA added) |         |
|   | phosphocholine            | 2.7 | <0.0001 | 4.3                  | <0.0001 |
|   | choline                   | 2.1 | <0.0001 | 4.5                  | <0.0001 |
|   | GSH                       | 2.0 | 0.002   | 1.6                  | 0.0025  |

  

| B | Depleted in HSC/MPP v WBM |      |         |                 |         |
|---|---------------------------|------|---------|-----------------|---------|
|   | Agathocleous et al        |      |         | DeVilbiss et al |         |
|   | Metabolite                | FC   | FDR     | FC              | FDR     |
|   | glutamine                 | 0.18 | <0.0001 | 0.33            | <0.0001 |
|   | N-acetylaspartate         | 0.30 | <0.0001 | 0.57            | <0.0001 |
|   | hypoxanthine              | 0.34 | <0.0001 | 0.46            | 0.048   |
|   | carnitine                 | 0.36 | <0.0001 | 0.21            | <0.0001 |
|   | IMP                       | 0.36 | 0.0003  | 0.10            | <0.0001 |
|   | spermidine                | 0.38 | 0.002   | n.d.            |         |
|   | acetylcholine             | 0.42 | <0.0001 | 0.37            | <0.0001 |
|   | trimethyllysine           | 0.48 | <0.0001 | 0.27            | <0.0001 |
|   | betaine                   | 0.50 | <0.0001 | n.d.            |         |
|   | glutamate                 | 0.64 | <0.0001 | 0.69            | 0.030   |
|   | taurine                   | 0.77 | 0.0001  | 0.64            | <0.0001 |
