# Supplementary material for: Metabolomic profiling of rare cell populations isolated by flow cytometry from tissues
Source: eLife journal article supplement (doi:10.7554/elife.61980), 2021-01-20

# Figure 3 - figure supplement 1

## A Flow cytometry gating strategy for haematopoietic cells

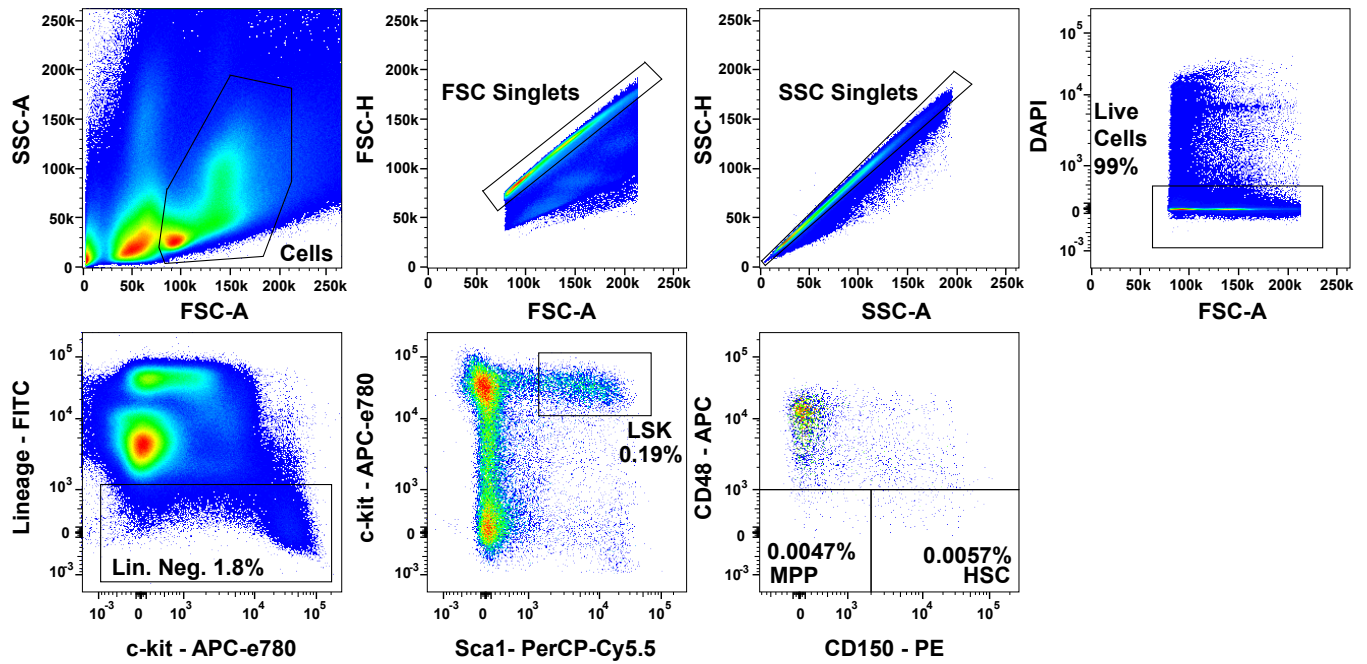

## B Flow cytometry gating strategy for human melanoma cells from subcutaneous tumors

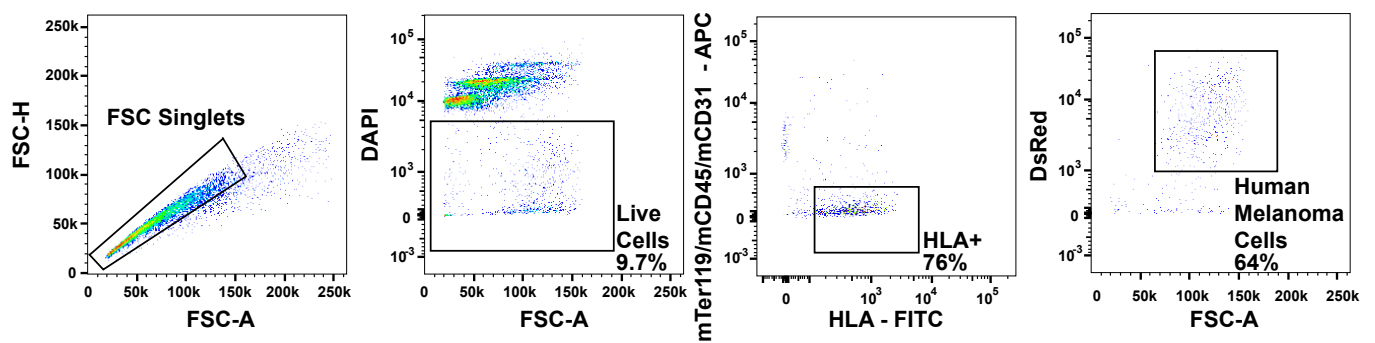

## C Flow cytometry gating strategy for circulating human melanoma cells from NSG mouse blood

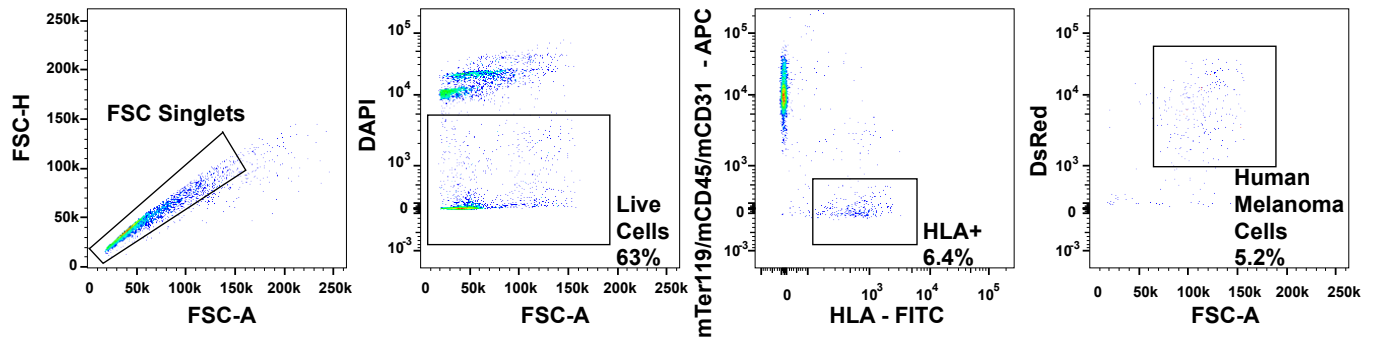

Supplement: supp [file elife_poa_e61980_Figure_3_figure_supplement_1.pdf › elife_poa_e61980_Figure_3_figure_supplement_1.pdf]
