# Supplementary figures and images for: Metabolomic profiling of rare cell populations isolated by flow cytometry from tissues
Source: eLife journal article supplement (doi:10.7554/elife.61980), 2021-01-20

Figure 1 - figure supplement 1

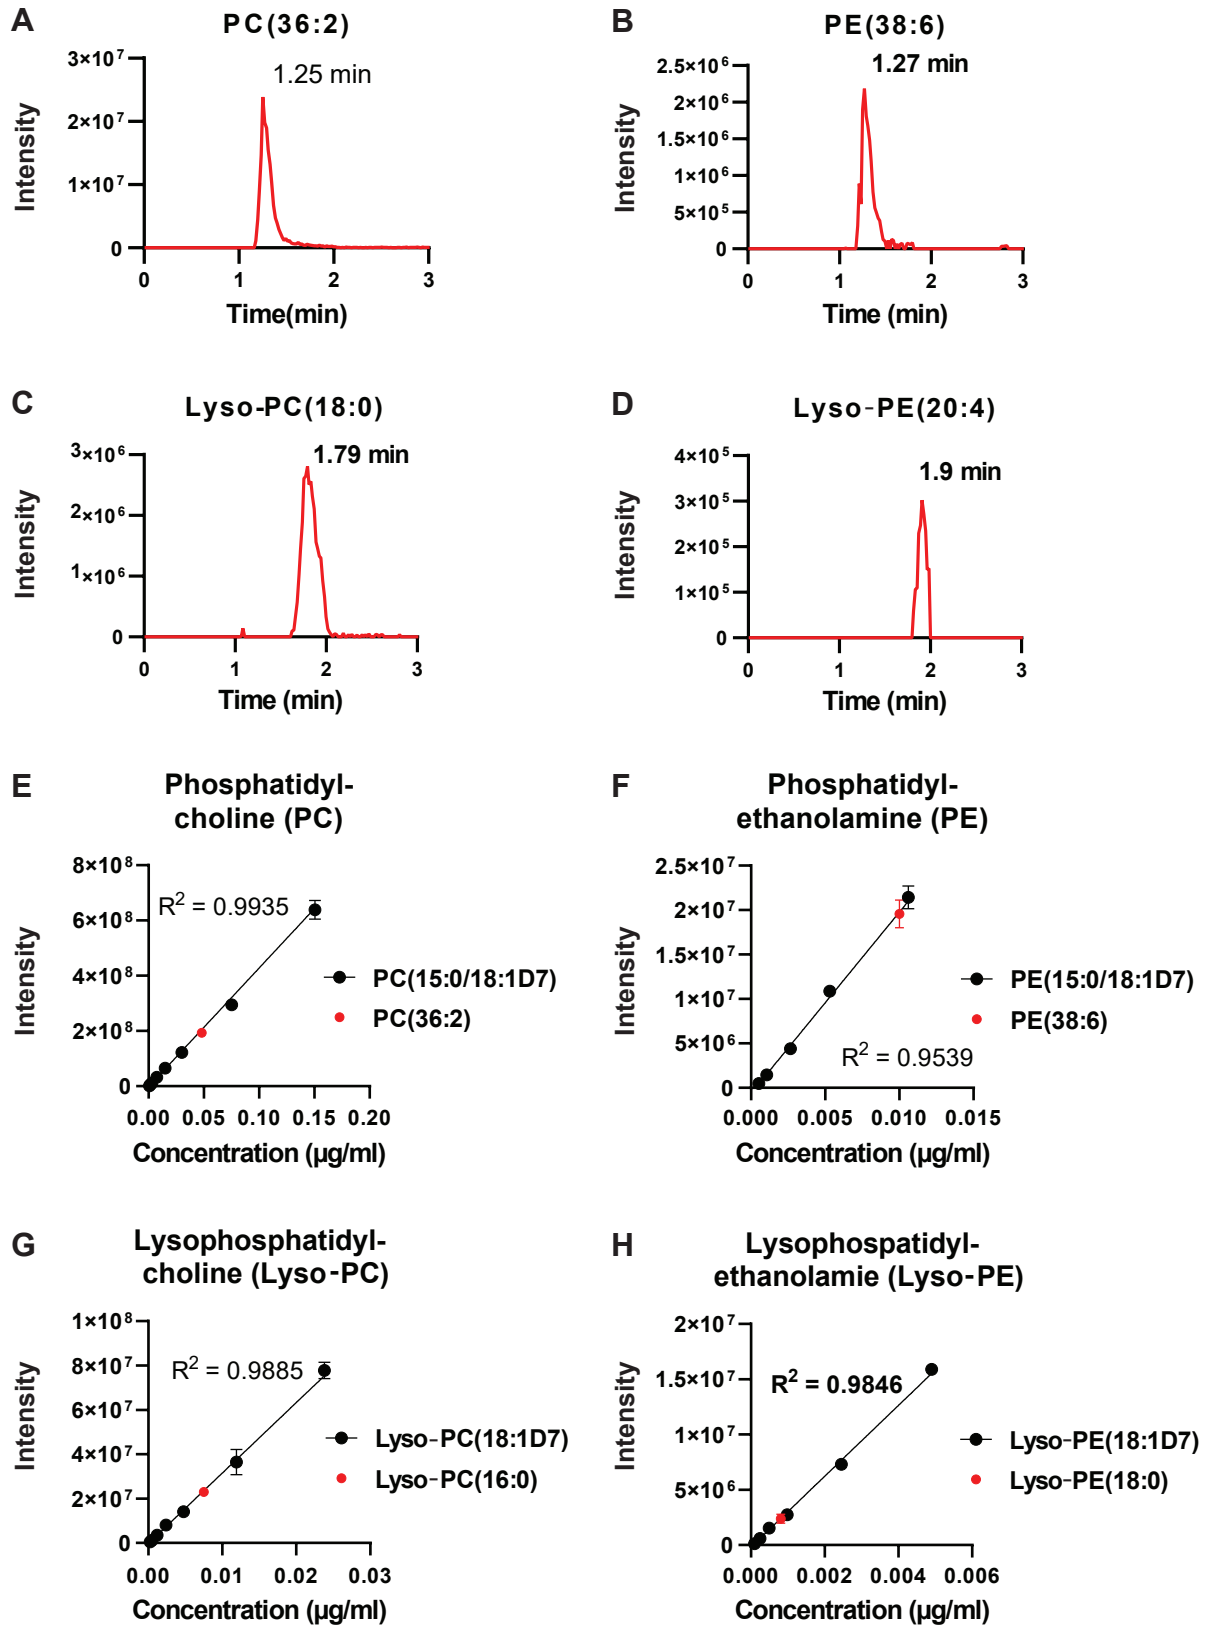

Supplement: supp [file elife_poa_e61980_Figure_1_figure_supplement_1.pdf › elife_poa_e61980_Figure_1_figure_supplement_1.pdf]

**A**

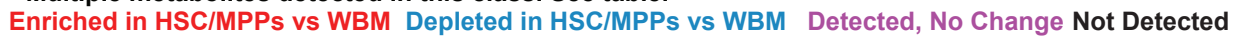[illegible]

Supplement: supp [file elife_poa_e61980_Figure_2_figure_supplement_2.pdf › elife_poa_e61980_Figure_2_figure_supplement_2.pdf]
